# Supplementary material for: Persistent cortical excitatory neuron dysregulation in adult Chd8 haploinsufficient mice
Source: bioRxiv preprint, doi:10.1101/2025.06.04.657776, version 3 (2025-07-19)
Supplement: Supplementary Tables [file 657776_file03.xlsx]

## Sheet: Supp Tables
Table S1	snRNA-seq metadata
Table S2	Replicate level snRNA-seq cell cluster counts - CT1
Table S3	Replicate level snRNA-seq cell cluster counts - CT2
Table S4	Replicate level snRNA-seq cell cluster counts - CT3
Table S5	snRNA-seq DEGs - CT1
Table S6	snRNA-seq DEGs - CT2
Table S7	snRNA-seq DEGs - CT3
Table S8	hdWGCNA module genes
Table S9	Bulk metadata- const
Table S10	Bulk metadata- cond
Table S11	Bulk metadata- syn nuc
Table S12	Bulk constitutive DEGs
Table S13	Bulk conditional DEGs
Table S14	Bulk synaptic DEGs
Table S15	Bulk nuclear DEGs
Table S16	Bulk constitutive qPCR validation primers and logFCs

## Sheet: Table S1
sample	condition	sex	batch
HET_ctx1	het	male	ctx1
HET_ctx2	het	male	ctx2
HET_ctx4	het	female	ctx4
HET_ctx5	het	male	ctx5
HET_ctx6	het	female	ctx6
WT_ctx1	wt	female	ctx1
WT_ctx2	wt	female	ctx2
WT_ctx4	wt	male	ctx4
WT_ctx5	wt	female	ctx5
WT_ctx6	wt	male	ctx6

## Sheet: Table S2
cluster	MHET_ctx1	FWT_ctx1	MHET_ctx2	FWT_ctx2	FHET_ctx4	MWT_ctx4	MHET_ctx5	FWT_ctx5	FHET_ctx6	MWT_ctx6	Total
L2/3 IT Glut1	220	171	123	116	191	130	273	345	257	198	2024
Astro1	326	141	231	68	106	283	222	188	203	252	2020
L4/5 IT Glut1	191	104	127	83	149	181	50	291	219	222	1617
L2/3 IT Glut2	131	189	110	89	128	132	101	318	182	234	1614
Oligo1	141	188	91	65	158	166	192	171	134	214	1520
L6 IT Glut	176	169	113	78	74	101	136	212	160	234	1453
L6 CT Glut1	161	180	114	76	114	107	142	208	134	179	1415
L2/3 IT Glut3	160	136	91	71	78	87	167	213	138	176	1317
L6 CT Glut2	153	130	108	44	122	61	142	113	99	167	1139
L4/5 IT Glut2	142	122	68	54	70	75	145	156	121	177	1130
L4/5 IT Glut3	119	110	72	70	86	78	181	112	57	102	987
L5 IT Glut	100	117	77	44	80	68	85	155	129	132	987
L5 ET Glut	86	88	43	26	57	51	125	117	114	135	842
Pvalb Gaba	86	105	53	31	64	59	104	110	111	113	836
L4/5 IT Glut4	61	56	47	36	65	70	53	127	100	60	675
Microglia	86	58	21	29	24	58	44	145	66	104	635
OPC	100	39	63	13	28	52	94	62	67	72	590
Sst Gaba	65	65	28	27	46	39	77	77	49	53	526
Endo	32	35	68	78	108	78	11	3	25	46	484
Lamp5 Gaba	49	29	21	25	12	46	62	38	71	39	392
Peri	20	23	37	64	50	52	24	22	17	28	337
Oligo2	51	21	22	20	45	28	29	41	30	34	321
Vip Gaba	42	42	11	10	11	39	36	30	40	45	306
VLMC	30	17	66	26	37	89	13	15	3	5	301
Astro2	64	14	44	25	51	25	26	8	5	9	271
L6b Glut	17	18	18	14	22	8	17	25	17	25	181
Total	2809	2367	1867	1282	1976	2163	2551	3302	2548	3055	23920

## Sheet: Table S3
cluster	MHET_ctx1	FWT_ctx1	MHET_ctx2	FWT_ctx2	FHET_ctx4	MWT_ctx4	MHET_ctx5	FWT_ctx5	FHET_ctx6	MWT_ctx6	Total
L4/5 IT Glut	513	392	314	243	370	404	429	686	497	561	4409
L2/3 IT Glut	511	496	324	276	397	349	541	876	577	608	4955
L6 IT Glut	176	169	113	78	74	101	136	212	160	234	1453
Astro	390	155	275	93	157	308	248	196	208	261	2291
L6 CT Glut	314	310	222	120	236	168	284	321	233	346	2554
Oligo	192	209	113	85	203	194	221	212	164	248	1841
L5 IT Glut	100	117	77	44	80	68	85	155	129	132	987
Peri	20	23	37	64	50	52	24	22	17	28	337
Microglia	86	58	21	29	24	58	44	145	66	104	635
Pvalb Gaba	86	105	53	31	64	59	104	110	111	113	836
Sst Gaba	65	65	28	27	46	39	77	77	49	53	526
OPC	100	39	63	13	28	52	94	62	67	72	590
L5 ET Glut	86	88	43	26	57	51	125	117	114	135	842
Endo	32	35	68	78	108	78	11	3	25	46	484
Vip Gaba	42	42	11	10	11	39	36	30	40	45	306
Lamp5 Gaba	49	29	21	25	12	46	62	38	71	39	392
VLMC	30	17	66	26	37	89	13	15	3	5	301
L6b Glut	17	18	18	14	22	8	17	25	17	25	181
Total	2809	2367	1867	1282	1976	2163	2551	3302	2548	3055	23920

## Sheet: Table S4
cluster	MHET_ctx1	FWT_ctx1	MHET_ctx2	FWT_ctx2	FHET_ctx4	MWT_ctx4	MHET_ctx5	FWT_ctx5	FHET_ctx6	MWT_ctx6	Total
Glutamatergic	1717	1590	1111	801	1236	1149	1617	2392	1727	2041	15381
Glial	682	403	451	191	388	554	563	470	439	581	4722
Vasculature-associated	82	75	171	168	195	219	48	40	45	79	1122
Microglia	86	58	21	29	24	58	44	145	66	104	635
Gabaergic	242	241	113	93	133	183	279	255	271	250	2060
Total	2809	2367	1867	1282	1976	2163	2551	3302	2548	3055	23920

## Sheet: Table S5
gene	baseMean	log2FoldChange	lfcSE	stat	pvalue	padj	Cell_Type_1	DE
Ddx3y	12.868	3.47943	1.65451	2.10299	0.0354667	0.999959	L4/5 IT Glut4	up
Polg2	1.21086	3.05102	1.57982	1.93125	0.0534521	0.999959	L4/5 IT Glut4	up
Lrrc23	2.18522	2.86539	1.23873	2.31316	0.0207138	0.999959	L4/5 IT Glut4	up
Pnpla2	1.61247	2.63136	1.34961	1.94972	0.0512092	0.999959	L4/5 IT Glut4	up
Kdm5d	15.1706	2.56115	1.44404	1.7736	0.076129	0.999959	L4/5 IT Glut4	up
Olfr655	0.609574	2.49379	2.19697	1.1351	0.256332	0.999959	L4/5 IT Glut4	up
D930020B18Rik	0.975271	2.49126	1.96505	1.26779	0.204874	0.999959	L4/5 IT Glut4	up
Eif2s3y	31.623	2.47136	1.41218	1.75003	0.0801132	0.999959	L4/5 IT Glut4	up
Syk	1.29619	2.45625	1.60818	1.52735	0.126674	0.999959	L4/5 IT Glut4	up
Rwdd2b	0.938799	2.44294	1.67633	1.45732	0.145028	0.999959	L4/5 IT Glut4	up
4933407L21Rik	0.861801	2.40035	1.82546	1.31493	0.188533	0.999959	L4/5 IT Glut4	up
Nop16	0.79351	2.40013	1.80333	1.33094	0.18321	0.999959	L4/5 IT Glut4	up
Pdgfra	1.06576	2.3965	1.69623	1.41284	0.157703	0.999959	L4/5 IT Glut4	up
Yif1a	1.09462	2.32992	1.55979	1.49374	0.135244	0.999959	L4/5 IT Glut4	up
Cklf	1.54366	2.32353	1.46084	1.59055	0.111712	0.999959	L4/5 IT Glut4	up
Slc29a1	0.654247	2.30693	2.27939	1.01208	0.3115	0.999959	L4/5 IT Glut4	up
Cdk18	4.21174	2.28973	0.96927	2.36233	0.0181606	0.999959	L4/5 IT Glut4	up
Cald1	0.913713	2.28575	1.73558	1.31699	0.187841	0.999959	L4/5 IT Glut4	up
Dazl	1.45194	2.27644	1.37534	1.65518	0.0978872	0.999959	L4/5 IT Glut4	up
Gm3248	1.05642	2.27249	1.55636	1.46013	0.144255	0.999959	L4/5 IT Glut4	up
Lmx1b	0.514389	2.27147	2.33999	0.970716	0.33169	0.999959	L4/5 IT Glut4	up
Mdga1	0.519258	2.22972	2.32653	0.958388	0.337867	0.999959	L4/5 IT Glut4	up
Pbld1	0.583321	2.21029	2.37555	0.930432	0.352147	0.999959	L4/5 IT Glut4	up
Cnga2	0.583321	2.21029	2.37555	0.930432	0.352147	0.999959	L4/5 IT Glut4	up
Tapbpl	1.54841	2.20528	1.46182	1.50859	0.131404	0.999959	L4/5 IT Glut4	up
Dusp4	1.1807	2.18085	1.54714	1.4096	0.158657	0.999959	L4/5 IT Glut4	up
Egln3	0.759753	2.11858	1.9233	1.10153	0.270664	0.999959	L4/5 IT Glut4	up
Minar1	0.551197	2.11144	2.43458	0.86727	0.385794	0.999959	L4/5 IT Glut4	up
Mrps16	2.49225	2.10545	1.17273	1.79534	0.0725991	0.999959	L4/5 IT Glut4	up
Il4i1	1.15928	2.08279	1.56769	1.32858	0.183987	0.999959	L4/5 IT Glut4	up
Ccnb1	0.721087	2.06052	2.08866	0.986529	0.323874	0.999959	L4/5 IT Glut4	up
Tmem74	0.448674	2.04391	2.64869	0.771668	0.440311	0.999959	L4/5 IT Glut4	up
Spata48	1.12759	2.02917	1.53718	1.32006	0.186814	0.999959	L4/5 IT Glut4	up
Sphk1	0.552199	2.0146	2.4403	0.825553	0.409058	0.999959	L4/5 IT Glut4	up
Klhl35	0.667164	1.98005	1.99793	0.991053	0.32166	0.999959	L4/5 IT Glut4	up
Lrrc74b	0.658863	1.97779	2.01616	0.980969	0.326608	0.999959	L4/5 IT Glut4	up
Thap1	1.07805	1.96526	1.67595	1.17263	0.240946	0.999959	L4/5 IT Glut4	up
Zfp189	1.62378	1.962	1.45044	1.35269	0.176154	0.999959	L4/5 IT Glut4	up
Aard	0.886425	1.9472	1.65722	1.17498	0.240001	0.999959	L4/5 IT Glut4	up
Nudt18	1.68573	1.94655	1.34415	1.44816	0.147571	0.999959	L4/5 IT Glut4	up
Urod	0.923772	1.94561	1.78711	1.08869	0.27629	0.999959	L4/5 IT Glut4	up
Gm2115	0.66798	1.93718	2.02041	0.958807	0.337656	0.999959	L4/5 IT Glut4	up
Gm14444	0.600486	1.93481	2.0965	0.922879	0.35607	0.999959	L4/5 IT Glut4	up
Hdac10	2.66633	1.93206	1.0377	1.86186	0.0626231	0.999959	L4/5 IT Glut4	up
Cstad	1.0119	1.91821	1.75976	1.09004	0.275695	0.999959	L4/5 IT Glut4	up
Adgra2	1.33779	1.91637	1.54942	1.23683	0.21615	0.999959	L4/5 IT Glut4	up
Mybpc3	0.803356	1.9124	1.85398	1.03151	0.3023	0.999959	L4/5 IT Glut4	up
Gtf3c6	1.25105	1.8967	1.53736	1.23374	0.2173	0.999959	L4/5 IT Glut4	up
Il17rb	2.41016	1.89621	1.20019	1.57992	0.114125	0.999959	L4/5 IT Glut4	up
Myrfl	1.72241	1.88385	1.36728	1.37781	0.168262	0.999959	L4/5 IT Glut4	up
Uty	50.4474	1.87001	1.71964	1.08745	0.27684	0.999959	L4/5 IT Glut4	up
Cntd1	1.47536	1.8639	1.36561	1.36489	0.172288	0.999959	L4/5 IT Glut4	up
Plod1	1.00227	1.8491	1.63497	1.13097	0.258068	0.999959	L4/5 IT Glut4	up
Coa3	1.81848	1.84904	1.34211	1.37771	0.168292	0.999959	L4/5 IT Glut4	up
Lck	0.383795	1.84004	2.82725	0.650822	0.515161	0.999959	L4/5 IT Glut4	up
Ucp1	0.44951	1.82857	2.65964	0.687528	0.49175	0.999959	L4/5 IT Glut4	up
Col13a1	0.44951	1.82857	2.65964	0.687528	0.49175	0.999959	L4/5 IT Glut4	up
4931429L15Rik	0.614599	1.82514	2.08492	0.8754	0.381357	0.999959	L4/5 IT Glut4	up
Tmem256	3.785	1.82444	0.913972	1.99617	0.0459156	0.999959	L4/5 IT Glut4	up
Lama5	1.36954	1.82245	1.48648	1.22601	0.220193	0.999959	L4/5 IT Glut4	up
Gfap	0.592146	1.81405	2.10508	0.861748	0.388826	0.999959	L4/5 IT Glut4	up
Wnt10b	0.656228	1.8138	2.03864	0.889711	0.373621	0.999959	L4/5 IT Glut4	up
Tnfrsf9	1.09647	1.80839	1.61018	1.1231	0.261396	0.999959	L4/5 IT Glut4	up
Arl4d	1.6886	1.80581	1.23971	1.45664	0.145215	0.999959	L4/5 IT Glut4	up
Rhox8	0.381996	1.80504	2.83086	0.637631	0.523714	0.999959	L4/5 IT Glut4	up
Cdpf1	1.10147	1.80019	1.57007	1.14657	0.25156	0.999959	L4/5 IT Glut4	up
Sbk3	0.563669	1.79813	2.43574	0.738229	0.460376	0.999959	L4/5 IT Glut4	up
Kcns3	2.69308	1.79702	1.00823	1.78235	0.0746923	0.999959	L4/5 IT Glut4	up
Siva1	0.796506	1.79467	1.86839	0.960544	0.336782	0.999959	L4/5 IT Glut4	up
Foxc1	0.359155	1.79046	2.89441	0.618593	0.536184	0.999959	L4/5 IT Glut4	up
Scd4	0.920859	1.78927	1.91095	0.936325	0.349106	0.999959	L4/5 IT Glut4	up
Slc40a1	0.535587	1.78482	2.1707	0.822233	0.410944	0.999959	L4/5 IT Glut4	up
C530025M09Rik	1.03777	1.7664	1.7193	1.0274	0.304234	0.999959	L4/5 IT Glut4	up
Cass4	0.35654	1.7626	2.90234	0.607304	0.543649	0.999959	L4/5 IT Glut4	up
Apol7a	0.35654	1.7626	2.90234	0.607304	0.543649	0.999959	L4/5 IT Glut4	up
Mrln	0.357356	1.7543	2.89842	0.605263	0.545004	0.999959	L4/5 IT Glut4	up
Serpinb9	0.410068	1.74244	2.75611	0.63221	0.52725	0.999959	L4/5 IT Glut4	up
Nefh	0.923404	1.73511	1.68975	1.02685	0.304493	0.999959	L4/5 IT Glut4	up
Gtsf1	0.605355	1.73166	2.07436	0.834791	0.403836	0.999959	L4/5 IT Glut4	up
Mob3a	1.9843	1.72905	1.23376	1.40145	0.161079	0.999959	L4/5 IT Glut4	up
Acad12	3.27774	1.72862	0.94303	1.83305	0.0667947	0.999959	L4/5 IT Glut4	up
Dpysl5	1.77606	1.70634	1.29022	1.32252	0.185996	0.999959	L4/5 IT Glut4	up
Lrrc1	2.14314	1.70537	1.18359	1.44084	0.14963	0.999959	L4/5 IT Glut4	up
Col17a1	1.31029	1.70183	1.44137	1.18071	0.237718	0.999959	L4/5 IT Glut4	up
Arsj	5.21571	1.70155	0.768665	2.21364	0.0268532	0.999959	L4/5 IT Glut4	up
Ppef1	1.70252	1.70045	1.24585	1.3649	0.172286	0.999959	L4/5 IT Glut4	up
Rxrg	0.564074	1.70002	2.26828	0.749476	0.45357	0.999959	L4/5 IT Glut4	up
Ptgs1	0.978072	1.69789	1.70893	0.99354	0.320447	0.999959	L4/5 IT Glut4	up
Fam129c	1.23356	1.69193	1.56309	1.08243	0.279064	0.999959	L4/5 IT Glut4	up
Pcdhga7	1.18107	1.68965	1.57548	1.07247	0.283509	0.999959	L4/5 IT Glut4	up
Stxbp2	2.83315	1.68567	1.0336	1.63087	0.102918	0.999959	L4/5 IT Glut4	up
Rassf2	2.35937	1.6838	1.09172	1.54233	0.122993	0.999959	L4/5 IT Glut4	up
Nostrin	0.425667	1.67184	2.93636	0.569358	0.569113	0.999959	L4/5 IT Glut4	up
Enho	0.425667	1.67184	2.93636	0.569358	0.569113	0.999959	L4/5 IT Glut4	up
4930563M21Rik	0.589741	1.66777	2.20229	0.757289	0.448877	0.999959	L4/5 IT Glut4	up
Ubiad1	2.35757	1.66418	1.0544	1.57833	0.114491	0.999959	L4/5 IT Glut4	up
Cln6	1.32948	1.66406	1.40662	1.18303	0.236799	0.999959	L4/5 IT Glut4	up
Cftr	1.52606	1.6586	1.53528	1.08033	0.279996	0.999959	L4/5 IT Glut4	up
Emx2	0.686932	1.65751	2.01339	0.823246	0.410368	0.999959	L4/5 IT Glut4	up
Jpt2	1.38389	1.65719	1.43629	1.1538	0.248583	0.999959	L4/5 IT Glut4	up
Xrcc3	0.716441	1.65476	1.98958	0.831714	0.40557	0.999959	L4/5 IT Glut4	up
Cd52	0.72757	1.64921	2.21905	0.743206	0.457357	0.999959	L4/5 IT Glut4	up
Ticam1	1.6381	1.62864	1.34879	1.20748	0.227246	0.999959	L4/5 IT Glut4	up
Gas2l2	0.319732	1.61688	3.05212	0.529756	0.596281	0.999959	L4/5 IT Glut4	up
Cavin1	0.60795	1.61208	2.17784	0.740219	0.459167	0.999959	L4/5 IT Glut4	up
Slc22a22	0.350058	1.61157	2.9448	0.547258	0.584201	0.999959	L4/5 IT Glut4	up
Uqcc3	0.591572	1.60781	2.20758	0.728312	0.466423	0.999959	L4/5 IT Glut4	up
Plac8l1	0.285975	1.60741	3.13772	0.512288	0.60845	0.999959	L4/5 IT Glut4	up
Tm4sf20	0.44119	1.60728	2.89585	0.555028	0.578876	0.999959	L4/5 IT Glut4	up
Aif1	0.520211	1.60542	2.35885	0.680597	0.496127	0.999959	L4/5 IT Glut4	up
Rtl8b	1.53676	1.60204	1.40544	1.13988	0.254335	0.999959	L4/5 IT Glut4	up
Nr1i3	1.02568	1.60021	1.5635	1.02348	0.306081	0.999959	L4/5 IT Glut4	up
Rps27l	2.01754	1.60017	1.27496	1.25507	0.209452	0.999959	L4/5 IT Glut4	up
Tagln	0.286792	1.59828	3.13609	0.509641	0.610303	0.999959	L4/5 IT Glut4	up
Prdm1	0.286792	1.59828	3.13609	0.509641	0.610303	0.999959	L4/5 IT Glut4	up
Olfr115	0.286792	1.59828	3.13609	0.509641	0.610303	0.999959	L4/5 IT Glut4	up
Zfp521	0.8214	1.59395	1.78389	0.893521	0.371578	0.999959	L4/5 IT Glut4	up
Pdcl2	0.317117	1.59242	3.05803	0.520733	0.602553	0.999959	L4/5 IT Glut4	up
Trim72	0.317117	1.59242	3.05803	0.520733	0.602553	0.999959	L4/5 IT Glut4	up
P4ha2	1.79227	1.58711	1.25533	1.2643	0.206122	0.999959	L4/5 IT Glut4	up
Mtbp	2.19308	1.58601	1.14941	1.37984	0.167635	0.999959	L4/5 IT Glut4	up
Llgl2	0.700062	1.58064	1.98109	0.797865	0.424949	0.999959	L4/5 IT Glut4	up
Mad2l2	1.18168	1.57975	1.50432	1.05014	0.293652	0.999959	L4/5 IT Glut4	up
Anxa4	1.1433	1.57825	1.61619	0.976523	0.328805	0.999959	L4/5 IT Glut4	up
1700020D05Rik	0.764144	1.57618	1.92848	0.81732	0.413746	0.999959	L4/5 IT Glut4	up
Lpar1	5.8043	1.57538	0.820713	1.91953	0.0549175	0.999959	L4/5 IT Glut4	up
Suox	0.90302	1.56886	1.8706	0.838692	0.401642	0.999959	L4/5 IT Glut4	up
Tmem238	0.592192	1.56407	2.11976	0.737851	0.460605	0.999959	L4/5 IT Glut4	up
Skint6	0.501033	1.56295	2.23027	0.700792	0.483433	0.999959	L4/5 IT Glut4	up
Etfrf1	3.5177	1.55797	0.951203	1.63789	0.101444	0.999959	L4/5 IT Glut4	up
Ankrd36	0.325418	1.55613	3.02236	0.514872	0.606642	0.999959	L4/5 IT Glut4	up
Syndig1l	0.325418	1.55613	3.02236	0.514872	0.606642	0.999959	L4/5 IT Glut4	up
Fam149a	2.47398	1.55528	1.02653	1.51508	0.129752	0.999959	L4/5 IT Glut4	up
Igf2bp2	0.628186	1.55305	2.18763	0.709927	0.47775	0.999959	L4/5 IT Glut4	up
Gdpd4	0.261335	1.55204	3.13037	0.495802	0.620034	0.999959	L4/5 IT Glut4	up
Myh8	0.261335	1.55204	3.13037	0.495802	0.620034	0.999959	L4/5 IT Glut4	up
Apobec2	0.261335	1.55204	3.13037	0.495802	0.620034	0.999959	L4/5 IT Glut4	up
Stkld1	0.291661	1.54546	3.12897	0.49392	0.621363	0.999959	L4/5 IT Glut4	up
Cd40	0.291661	1.54546	3.12897	0.49392	0.621363	0.999959	L4/5 IT Glut4	up
Gm9844	0.291661	1.54546	3.12897	0.49392	0.621363	0.999959	L4/5 IT Glut4	up
Ankrd31	0.661914	1.54252	2.14069	0.720573	0.471172	0.999959	L4/5 IT Glut4	up
Pars2	0.987502	1.53869	1.77008	0.869277	0.384696	0.999959	L4/5 IT Glut4	up
Maff	0.492139	1.53832	2.2427	0.685922	0.492762	0.999959	L4/5 IT Glut4	up
Tbl2	3.33303	1.53744	0.907998	1.69322	0.0904129	0.999959	L4/5 IT Glut4	up
Plb1	0.507705	1.53651	2.3609	0.650815	0.515166	0.999959	L4/5 IT Glut4	up
Tmem72	0.292477	1.53563	3.12734	0.491033	0.623403	0.999959	L4/5 IT Glut4	up
Plek2	0.292477	1.53563	3.12734	0.491033	0.623403	0.999959	L4/5 IT Glut4	up
Gm12689	2.24033	1.53278	1.0905	1.40558	0.159849	0.999959	L4/5 IT Glut4	up
Il3ra	0.995394	1.52786	1.76573	0.865286	0.386882	0.999959	L4/5 IT Glut4	up
Lrrc37a	0.419185	1.52389	2.97931	0.511492	0.609007	0.999959	L4/5 IT Glut4	up
Col6a1	0.82644	1.52376	1.94523	0.783332	0.433432	0.999959	L4/5 IT Glut4	up
Olfml2b	1.47548	1.52274	1.40789	1.08158	0.279441	0.999959	L4/5 IT Glut4	up
Nlrc4	1.48669	1.52109	2.42976	0.626024	0.531299	0.999959	L4/5 IT Glut4	up
Gm3417	1.15013	1.51151	1.67473	0.902536	0.366772	0.999959	L4/5 IT Glut4	up
Rftn2	1.08493	1.5091	1.66616	0.905735	0.365076	0.999959	L4/5 IT Glut4	up
Frat1	1.7261	1.5086	1.31626	1.14613	0.251742	0.999959	L4/5 IT Glut4	up
Lpar6	0.505907	1.49362	2.36117	0.632578	0.527009	0.999959	L4/5 IT Glut4	up
Aunip	0.66533	1.49329	1.82799	0.816902	0.413984	0.999959	L4/5 IT Glut4	up
Pifo	0.317914	1.49277	3.13963	0.47546	0.634459	0.999959	L4/5 IT Glut4	up
Mboat4	0.317914	1.49277	3.13963	0.47546	0.634459	0.999959	L4/5 IT Glut4	up
Sgcg	0.317914	1.49277	3.13963	0.47546	0.634459	0.999959	L4/5 IT Glut4	up
Lrrc36	1.3267	1.49004	1.49778	0.994831	0.319818	0.999959	L4/5 IT Glut4	up
Ppp1r1c	0.491711	1.48571	2.40225	0.618468	0.536267	0.999959	L4/5 IT Glut4	up
Tnfrsf25	9.21154	1.48543	0.565534	2.6266	0.0086242	0.999959	L4/5 IT Glut4	up
Kcnmb2	4.47468	1.47904	0.910223	1.62492	0.104179	0.999959	L4/5 IT Glut4	up
Gab1	0.791866	1.47899	1.96415	0.752992	0.451455	0.999959	L4/5 IT Glut4	up
Bend7	4.41666	1.4768	0.828632	1.78221	0.0747144	0.999959	L4/5 IT Glut4	up
Fndc10	1.39109	1.47562	1.47657	0.999355	0.317623	0.999959	L4/5 IT Glut4	up
Prps1l3	0.459424	1.47441	2.85792	0.515902	0.605923	0.999959	L4/5 IT Glut4	up
Fut10	0.771247	1.47365	2.08773	0.70586	0.480275	0.999959	L4/5 IT Glut4	up
Pigx	8.28729	1.4611	0.581072	2.51449	0.0119203	0.999959	L4/5 IT Glut4	up
Wdr5b	0.708784	1.45879	1.88208	0.775093	0.438284	0.999959	L4/5 IT Glut4	up
Shh	1.04367	1.45514	1.60226	0.908179	0.363784	0.999959	L4/5 IT Glut4	up
Nr2f6	3.51747	1.45292	0.930604	1.56127	0.118461	0.999959	L4/5 IT Glut4	up
Htr4	0.911519	1.45055	3.10332	0.46742	0.6402	0.999959	L4/5 IT Glut4	up
Rnf113a1	0.533978	1.44813	2.30717	0.627666	0.530223	0.999959	L4/5 IT Glut4	up
Tnfaip3	1.48988	1.44554	1.43514	1.00724	0.313817	0.999959	L4/5 IT Glut4	up
Zfp781	1.20216	1.44508	1.53784	0.939683	0.34738	0.999959	L4/5 IT Glut4	up
Zfp536	1.23039	1.44091	1.51838	0.948973	0.342634	0.999959	L4/5 IT Glut4	up
Gsn	0.661943	1.44017	2.16699	0.664594	0.50631	0.999959	L4/5 IT Glut4	up
Cd164l2	0.582442	1.43764	2.22702	0.645544	0.518575	0.999959	L4/5 IT Glut4	up
Snai3	0.704752	1.43625	1.88413	0.762289	0.445887	0.999959	L4/5 IT Glut4	up
Acaa2	0.293274	1.43527	3.13173	0.4583	0.646737	0.999959	L4/5 IT Glut4	up
Ftl1-ps1	0.777524	1.43024	1.82023	0.785745	0.432017	0.999959	L4/5 IT Glut4	up
Acot4	0.735644	1.42876	1.87939	0.760226	0.447119	0.999959	L4/5 IT Glut4	up
Fchsd1	1.31193	1.42826	1.4915	0.9576	0.338265	0.999959	L4/5 IT Glut4	up
Pelo	1.47232	1.42588	1.36893	1.0416	0.297597	0.999959	L4/5 IT Glut4	up
Gpr146	3.71688	1.42155	0.886576	1.60342	0.108843	0.999959	L4/5 IT Glut4	up
Bglap3	0.748807	1.41963	1.8161	0.781689	0.434397	0.999959	L4/5 IT Glut4	up
Lrp10	1.27165	1.41255	1.48505	0.951181	0.341512	0.999959	L4/5 IT Glut4	up
Tgds	2.67941	1.40839	0.98546	1.42917	0.152954	0.999959	L4/5 IT Glut4	up
Vwa1	2.09541	1.40737	1.13836	1.23632	0.216341	0.999959	L4/5 IT Glut4	up
Thoc6	0.869427	1.40356	1.89645	0.740096	0.459242	0.999959	L4/5 IT Glut4	up
F8a	1.76674	1.40323	1.36865	1.02527	0.305237	0.999959	L4/5 IT Glut4	up
1700061G19Rik	1.96854	1.40147	1.16774	1.20016	0.230079	0.999959	L4/5 IT Glut4	up
Acat3	0.607534	1.40142	2.21863	0.631658	0.527611	0.999959	L4/5 IT Glut4	up
Tmem81	1.6566	1.39873	1.25505	1.11448	0.265074	0.999959	L4/5 IT Glut4	up
Ttyh2	0.318916	1.39811	3.14542	0.44449	0.656688	0.999959	L4/5 IT Glut4	up
Layn	0.422421	1.39341	2.96006	0.470738	0.637828	0.999959	L4/5 IT Glut4	up
Gm3435	2.10771	1.39321	1.13325	1.2293880382217801	0.218926	0.999959	L4/5 IT Glut4	up
Dmpk	3.16482	1.39263	0.926999	1.5023	0.133019	0.999959	L4/5 IT Glut4	up
Stk26	1.73879	1.38532	1.36461	1.01518	0.310021	0.999959	L4/5 IT Glut4	up
Prox1	0.358338	1.38412	3.12281	0.44323	0.6576	0.999959	L4/5 IT Glut4	up
Guca1b	0.358338	1.38412	3.12281	0.44323	0.6576	0.999959	L4/5 IT Glut4	up
Gm1673	1.73983	1.38154	1.50153	0.920094	0.357523	0.999959	L4/5 IT Glut4	up
Gm6169	0.9873	1.38136	1.65977	0.832258	0.405264	0.999959	L4/5 IT Glut4	up
Pcp4l1	0.539664	1.38118	2.32284	0.59461	0.552104	0.999959	L4/5 IT Glut4	up
Acot5	0.443453	1.37668	2.48357	0.554317	0.579362	0.999959	L4/5 IT Glut4	up
Urb2	3.01824	1.37149	0.976192	1.40493	0.160041	0.999959	L4/5 IT Glut4	up
Tgfbr3l	0.48727	1.37035	2.40946	0.568738	0.569534	0.999959	L4/5 IT Glut4	up
March9	1.4313	1.36836	1.44776	0.945153	0.344581	0.999959	L4/5 IT Glut4	up
Clgn	3.2242	1.36812	0.927579	1.47493	0.14023	0.999959	L4/5 IT Glut4	up
Nqo1	0.702308	1.36548	1.87316	0.728971	0.466019	0.999959	L4/5 IT Glut4	up
Zfp703	2.4683	1.36541	1.01879	1.34022	0.180173	0.999959	L4/5 IT Glut4	up
Mnd1	0.72684	1.3614	2.06203	0.660224	0.50911	0.999959	L4/5 IT Glut4	up
Card19	0.645321	1.35896	2.14544	0.633419	0.52646	0.999959	L4/5 IT Glut4	up
Nnt	2.5136	1.35583	0.981529	1.38135	0.167172	0.999959	L4/5 IT Glut4	up
Gm31371	0.253035	1.35538	3.14333	0.431192	0.666329	0.999959	L4/5 IT Glut4	up
Smim26	2.3121898799100302	1.3519	1.22674	1.10203	0.270449	0.999959	L4/5 IT Glut4	up
Islr	1.41538	1.34939	1.33684	1.00939	0.312788	0.999959	L4/5 IT Glut4	up
Ntn1	0.565116	1.3469	2.27722	0.591464	0.554209	0.999959	L4/5 IT Glut4	up
Adssl1	1.75101	1.34526	1.24509	1.08045	0.279943	0.999959	L4/5 IT Glut4	up
Zscan12	2.86662	1.34094	1.0012	1.33934	0.18046	0.999959	L4/5 IT Glut4	up
Gjc3	0.294276	1.33855	3.13747	0.426634	0.669646	0.999959	L4/5 IT Glut4	up
Tmppe	0.294276	1.33855	3.13747	0.426634	0.669646	0.999959	L4/5 IT Glut4	up
Nde1	0.294276	1.33855	3.13747	0.426634	0.669646	0.999959	L4/5 IT Glut4	up
Rnf17	3.97099	1.33675	0.833844	1.60311	0.108909	0.999959	L4/5 IT Glut4	up
Kcnn1	2.09947	1.33462	1.11544	1.1965	0.231502	0.999959	L4/5 IT Glut4	up
Plekhs1	0.460997	1.3335	2.45237	0.543759	0.586608	0.999959	L4/5 IT Glut4	up
Asprv1	0.90668	1.33213	1.71024	0.778918	0.436028	0.999959	L4/5 IT Glut4	up
Pgd	5.46497	1.33188	0.6909	1.92774	0.053887	0.999959	L4/5 IT Glut4	up
Lamc3	0.295092	1.33022	3.13835	0.42386	0.671668	0.999959	L4/5 IT Glut4	up
Colq	0.295092	1.33022	3.13835	0.42386	0.671668	0.999959	L4/5 IT Glut4	up
Gpatch3	2.86015	1.32694	0.937347	1.41563	0.156884	0.999959	L4/5 IT Glut4	up
Nos1	0.98851	1.32692	1.59635	0.831222	0.405848	0.999959	L4/5 IT Glut4	up
Asic3	0.260519	1.32656	3.135	0.423143	0.672191	0.999959	L4/5 IT Glut4	up
Igtp	0.260519	1.32656	3.135	0.423143	0.672191	0.999959	L4/5 IT Glut4	up
Rtp4	2.097	1.3265	1.24768	1.06317	0.287703	0.999959	L4/5 IT Glut4	up
Slco4a1	0.461814	1.32425	2.44611	0.541371	0.588252	0.999959	L4/5 IT Glut4	up
A4galt	1.53237	1.32269	1.37721	0.96041	0.336849	0.999959	L4/5 IT Glut4	up
Dnah6	0.573959	1.32108	2.21655	0.596007	0.551171	0.999959	L4/5 IT Glut4	up
Mef2b	0.492923	1.31915	2.37328	0.555835	0.578324	0.999959	L4/5 IT Glut4	up
Gm13199	0.435342	1.31717	2.48234	0.530618	0.595684	0.999959	L4/5 IT Glut4	up
Mmel1	2.59098	1.31419	1.01299	1.29733	0.194516	0.999959	L4/5 IT Glut4	up
Il20rb	1.93157	1.31271	1.18514	1.10764	0.268016	0.999959	L4/5 IT Glut4	up
Thpo	5.10544	1.31214	0.75499	1.73796	0.082218	0.999959	L4/5 IT Glut4	up
Hus1b	0.326234	1.31127	3.13511	0.418253	0.675762	0.999959	L4/5 IT Glut4	up
Pak4	0.972142	1.30831	1.6634	0.786527	0.431559	0.999959	L4/5 IT Glut4	up
Slc12a4	0.262152	1.30697	3.13414	0.417013	0.676669	0.999959	L4/5 IT Glut4	up
Msln	0.262152	1.30697	3.13414	0.417013	0.676669	0.999959	L4/5 IT Glut4	up
Nfkbie	0.262152	1.30697	3.13414	0.417013	0.676669	0.999959	L4/5 IT Glut4	up
Cdc42bpg	0.262152	1.30697	3.13414	0.417013	0.676669	0.999959	L4/5 IT Glut4	up
Vsig8	0.227578	1.30523	3.13711	0.416061	0.677365	0.999959	L4/5 IT Glut4	up
Vmn1r183	0.227578	1.30523	3.13711	0.416061	0.677365	0.999959	L4/5 IT Glut4	up
1700016D06Rik	0.227578	1.30523	3.13711	0.416061	0.677365	0.999959	L4/5 IT Glut4	up
Fgf17	0.35656	1.30357	3.13585	0.415699	0.67763	0.999959	L4/5 IT Glut4	up
Card10	0.35656	1.30357	3.13585	0.415699	0.67763	0.999959	L4/5 IT Glut4	up
Pole	0.492956	1.30235	2.38653	0.545707	0.585268	0.999959	L4/5 IT Glut4	up
Fam129a	0.628166	1.30053	2.17773	0.597195	0.550377	0.999959	L4/5 IT Glut4	up
Nmb	1.9294	1.29902	1.22389	1.06138	0.288515	0.999959	L4/5 IT Glut4	up
Zglp1	1.36017	1.29606	1.45011	0.893765	0.371447	0.999959	L4/5 IT Glut4	up
Cdc42ep4	0.446068	1.29449	2.46619	0.524894	0.599657	0.999959	L4/5 IT Glut4	up
Pxdc1	0.446068	1.29449	2.46619	0.524894	0.599657	0.999959	L4/5 IT Glut4	up
Ttf2	0.228395	1.29399	3.13536	0.412708	0.67982	0.999959	L4/5 IT Glut4	up
Sh3bp2	0.435929	1.29174	2.48903	0.518976	0.603778	0.999959	L4/5 IT Glut4	up
H2-DMb2	0.322803	1.29109	3.13338	0.412044	0.680308	0.999959	L4/5 IT Glut4	up
Cidea	0.567552	1.29042	2.269	0.568716	0.569549	0.999959	L4/5 IT Glut4	up
Chek1	1.47208	1.29038	1.50826	0.855547	0.392248	0.999959	L4/5 IT Glut4	up
Fam110a	0.25872	1.2858	3.13386	0.410294	0.68159	0.999959	L4/5 IT Glut4	up
Dqx1	0.25872	1.2858	3.13386	0.410294	0.68159	0.999959	L4/5 IT Glut4	up
Rhod	0.25872	1.2858	3.13386	0.410294	0.68159	0.999959	L4/5 IT Glut4	up
Aldh1l1	4.77583	1.28551	0.77837	1.65154	0.0986275	0.999959	L4/5 IT Glut4	up
Med18	0.496164	1.28352	2.39873	0.535083	0.592592	0.999959	L4/5 IT Glut4	up
Tmem140	0.496164	1.28352	2.39873	0.535083	0.592592	0.999959	L4/5 IT Glut4	up
Pmf1	0.950096	1.28342	1.62613	0.789249	0.429967	0.999959	L4/5 IT Glut4	up
Fcer2a	0.42726	1.2794	2.53226	0.505242	0.613389	0.999959	L4/5 IT Glut4	up
Usp27x	1.06668	1.27933	1.63585	0.782057	0.434181	0.999959	L4/5 IT Glut4	up
Ccdc97	1.81649	1.2761	1.23655	1.03198	0.302081	0.999959	L4/5 IT Glut4	up
Pcdhgc4	3.12866	1.27474	0.968192	1.31662	0.187968	0.999959	L4/5 IT Glut4	up
Rgs16	0.766992	1.27208	1.7794	0.714891	0.474676	0.999959	L4/5 IT Glut4	up
Eaf1	2.786	1.26104	0.974186	1.29445	0.19551	0.999959	L4/5 IT Glut4	up
AW011738	0.533768	1.26095	2.30722	0.546526	0.584704	0.999959	L4/5 IT Glut4	up
Itga7	1.11277	1.25982	1.54428	0.815797	0.414616	0.999959	L4/5 IT Glut4	up
Man2b2	0.953338	1.25904	1.82197	0.691034	0.489544	0.999959	L4/5 IT Glut4	up
Cmtr2	1.06588	1.2589	1.57786	0.797851	0.424957	0.999959	L4/5 IT Glut4	up
Tmem69	3.05649	1.25888	0.93995	1.33931	0.18047093933456201	0.999959	L4/5 IT Glut4	up
Dusp2	0.428057	1.25719	2.50284	0.502308	0.615451	0.999959	L4/5 IT Glut4	up
Rdm1	0.428057	1.25719	2.50284	0.502308	0.615451	0.999959	L4/5 IT Glut4	up
Zmynd10	0.445251	1.25659	2.45897	0.511022	0.609336	0.999959	L4/5 IT Glut4	up
Otogl	0.441028	1.2535	2.49451	0.502506	0.615312	0.999959	L4/5 IT Glut4	up
Abca6	1.64862	1.24901	1.24873	1.00022	0.317204	0.999959	L4/5 IT Glut4	up
Zfp964	1.76392	1.24898	1.27919	0.976382	0.328875	0.999959	L4/5 IT Glut4	up
Myo3b	0.458382	1.24744	2.4397	0.511308	0.609135	0.999959	L4/5 IT Glut4	up
Dpys	0.601247	1.24673	1.9578	0.636802	0.524254	0.999959	L4/5 IT Glut4	up
Stk36	3.43878	1.24442	0.882523	1.41007	0.158518	0.999959	L4/5 IT Glut4	up
Pkhd1l1	1.24194	1.24167	1.45178	0.855272	0.392401	0.999959	L4/5 IT Glut4	up
Olfr543	0.407271	1.23937	2.56699	0.482811	0.62923	0.999959	L4/5 IT Glut4	up
Barx2	2.72249	1.23761	1.13851	1.08705	0.277014	0.999959	L4/5 IT Glut4	up
Angptl7	1.80074	1.23572	1.23268	1.00246	0.316121	0.999959	L4/5 IT Glut4	up
Ino80e	6.18881	1.23444	0.715652	1.72492	0.0845414	0.999959	L4/5 IT Glut4	up
Prlr	4.17729	1.23326	0.81012	1.52232	0.127929	0.999959	L4/5 IT Glut4	up
Mas1	1.3571	1.23302	1.3821	0.892134	0.372321	0.999959	L4/5 IT Glut4	up
Nynrin	0.71447	1.23206	1.89842	0.64899	0.516345	0.999959	L4/5 IT Glut4	up
Cntnap3	10.7627	1.23202	0.56401	2.1844	0.0289329	0.999959	L4/5 IT Glut4	up
Trim71	1.20131	1.2298	1.41746	0.867608	0.385609	0.999959	L4/5 IT Glut4	up
Mfsd12	3.13533	1.22854	0.938045	1.30968	0.190304	0.999959	L4/5 IT Glut4	up
Eid3	0.901183	1.22751	1.81776	0.675289	0.499492	0.999959	L4/5 IT Glut4	up
Olfr1369-ps1	0.557984	1.22715	2.64882	0.46328	0.643164	0.999959	L4/5 IT Glut4	up
Spata24	3.47333	1.22713	0.854773	1.43561	0.151112	0.999959	L4/5 IT Glut4	up
Fam71f2	0.751469	1.22672	1.84361	0.665388	0.505802	0.999959	L4/5 IT Glut4	up
Jmjd7	0.426832	1.22598	2.54147	0.482392	0.629527	0.999959	L4/5 IT Glut4	up
Atp5e	3.75519	1.22375	0.928338	1.31821	0.187432	0.999959	L4/5 IT Glut4	up
Cenpw	1.24861	1.22374	1.59583	0.766834	0.44318	0.999959	L4/5 IT Glut4	up
Prc1	1.11884	1.22296	1.55577	0.786078	0.431822	0.999959	L4/5 IT Glut4	up
Ttc9c	4.99395	1.2197	0.745513	1.63606	0.101828	0.999959	L4/5 IT Glut4	up
Dysf	3.53914	1.21952	0.881683	1.38318	0.166611	0.999959	L4/5 IT Glut4	up
4931414P19Rik	2.4964	1.21452	0.976849	1.24331	0.213755	0.999959	L4/5 IT Glut4	up
Tspan15	2.87776	1.20834	0.951418	1.27004	0.204071	0.999959	L4/5 IT Glut4	up
Pde11a	1.90799	1.20521	1.2515	0.963011	0.335542	0.999959	L4/5 IT Glut4	up
Dbndd1	2.5	1.20507	1.0913	1.10425	0.269484	0.999959	L4/5 IT Glut4	up
Fkbp11	0.49879	1.20455	2.77159	0.434606	0.663848	0.999959	L4/5 IT Glut4	up
Mal	2.23382	1.20107	1.11958	1.07278	0.283369	0.999959	L4/5 IT Glut4	up
Fam186b	1.22085	1.19879	1.46151	0.820242	0.412078	0.999959	L4/5 IT Glut4	up
Padi2	2.1356	1.19784	1.12969	1.06032	0.288998	0.999959	L4/5 IT Glut4	up
Rnf43	1.27735	1.19761	1.43466	0.834773	0.403845	0.999959	L4/5 IT Glut4	up
Zfp69	1.03636	1.19718	1.58977	0.753053	0.451418	0.999959	L4/5 IT Glut4	up
Gzmk	6.59107	1.19571	0.62159	1.92364	0.0544003	0.999959	L4/5 IT Glut4	up
Kctd4	10.9598	1.1949	0.538628	2.21842	0.0265265	0.999959	L4/5 IT Glut4	up
Snn	5.78118	1.19438	0.710006	1.68222	0.0925271	0.999959	L4/5 IT Glut4	up
Doc2b	0.435112	1.19248	2.69912	0.441803	0.658632	0.999959	L4/5 IT Glut4	up
Gxylt2	0.565496	1.19207	2.10848	0.565366	0.571825	0.999959	L4/5 IT Glut4	up
BC055324	1.81778	1.19024	1.2184	0.976886	0.328626	0.999959	L4/5 IT Glut4	up
Foxo6	2.14493	1.19019	1.05628	1.12677	0.259839	0.999959	L4/5 IT Glut4	up
Mtcp1	3.39738	1.18406	0.860821	1.3755	0.168976	0.999959	L4/5 IT Glut4	up
Muc6	0.436971	1.18292	2.52347	0.468766	0.639237	0.999959	L4/5 IT Glut4	up
Alg11	7.35423	1.17987	0.603245	1.95587	0.0504803	0.999959	L4/5 IT Glut4	up
Psph	4.42379	1.17545	0.791853	1.48442	0.137697	0.999959	L4/5 IT Glut4	up
Pde1c	3.62853	1.17409	0.887071	1.32356	0.185651	0.999959	L4/5 IT Glut4	up
Asnsd1	2.23648	1.17332	1.15155	1.0189	0.30825	0.999959	L4/5 IT Glut4	up
Prss54	1.08286	1.17241	1.534	0.76428	0.444701	0.999959	L4/5 IT Glut4	up
Amz1	0.519782	1.17116	2.34436	0.499567	0.61738	0.999959	L4/5 IT Glut4	up
Dchs1	0.881965	1.17051	1.63147	0.717456	0.473093	0.999959	L4/5 IT Glut4	up
Gm14305	1.53854	1.16973	1.40178	0.834465	0.404019	0.999959	L4/5 IT Glut4	up
Pih1d2	1.68759	1.16882	1.30438	0.896077	0.370212	0.999959	L4/5 IT Glut4	up
Serpinb1a	0.345189	1.16756	3.12344	0.373806	0.708548	0.999959	L4/5 IT Glut4	up
Slc29a2	1.63202	1.16751	1.32152	0.883458	0.376989	0.999959	L4/5 IT Glut4	up
Colec11	0.403214	1.16654	2.59425	0.449664	0.652953	0.999959	L4/5 IT Glut4	up
1700017B05Rik	1.65932	1.16231	1.31467	0.884107	0.376639	0.999959	L4/5 IT Glut4	up
Ddo	2.00126	1.16042	1.14661	1.01205	0.311515	0.999959	L4/5 IT Glut4	up
Nek7	4.68937	1.16022	0.752185	1.54246	0.122962	0.999959	L4/5 IT Glut4	up
Rab37	0.687386	1.15859	1.99557	0.58058	0.561523	0.999959	L4/5 IT Glut4	up
Mpp4	1.34499	1.15732	1.44359	0.801695	0.422729	0.999959	L4/5 IT Glut4	up
Kifc5b	2.87452	1.15684	0.932696	1.24032	0.214856	0.999959	L4/5 IT Glut4	up
Tfeb	0.922421	1.15462	1.70474	0.677299	0.498216	0.999959	L4/5 IT Glut4	up
Mt3	4.85293	1.1537	1.0753	1.07291	0.283312	0.999959	L4/5 IT Glut4	up
Akip1	0.489309	1.15312	2.39983	0.480501	0.630871	0.999959	L4/5 IT Glut4	up
Ckap2	0.311432	1.15019	3.12079	0.368555	0.712459	0.999959	L4/5 IT Glut4	up
Ramp3	1.50765	1.1492	1.44717	0.794103	0.427135	0.999959	L4/5 IT Glut4	up
1700034I23Rik	0.690766	1.14889	1.95097	0.588879	0.555942	0.999959	L4/5 IT Glut4	up
Arr3	6.78084	1.14778	0.642825	1.78552	0.0741772	0.999959	L4/5 IT Glut4	up
Zfp27	6.02903	1.14762	0.686988	1.6705	0.0948197	0.999959	L4/5 IT Glut4	up
Zfp7	3.33269	1.14601	0.928723	1.23396	0.217217	0.999959	L4/5 IT Glut4	up
Gm2a	2.3356	1.13914	1.14511	0.994787	0.31984	0.999959	L4/5 IT Glut4	up
Rasa4	2.37677	1.13853	1.02808	1.10743	0.268106	0.999959	L4/5 IT Glut4	up
Atp6v1c2	0.625103	1.13656	2.16235	0.525614	0.599156	0.999959	L4/5 IT Glut4	up
Tec	0.518197	1.13451	2.32801	0.487333	0.626022	0.999959	L4/5 IT Glut4	up
Zfp235	3.79199	1.12851	0.847796	1.33111	0.183153	0.999959	L4/5 IT Glut4	up
Meis2	25.9801	1.12747	0.389341	2.89585	0.00378138	0.999959	L4/5 IT Glut4	up
Ube2c	0.221096	1.12662	3.15232	0.357395	0.720796	0.999959	L4/5 IT Glut4	up
S100a2	0.221096	1.12662	3.15232	0.357395	0.720796	0.999959	L4/5 IT Glut4	up
Fndc7	0.221096	1.12662	3.15232	0.357395	0.720796	0.999959	L4/5 IT Glut4	up
Ccdc146	0.221096	1.12662	3.15232	0.357395	0.720796	0.999959	L4/5 IT Glut4	up
Cdkn1c	0.221096	1.12662	3.15232	0.357395	0.720796	0.999959	L4/5 IT Glut4	up
Trhr2	0.221096	1.12662	3.15232	0.357395	0.720796	0.999959	L4/5 IT Glut4	up
Syde1	0.221096	1.12662	3.15232	0.357395	0.720796	0.999959	L4/5 IT Glut4	up
Papln	0.221096	1.12662	3.15232	0.357395	0.720796	0.999959	L4/5 IT Glut4	up
Msh5	0.221096	1.12662	3.15232	0.357395	0.720796	0.999959	L4/5 IT Glut4	up
4930546C10Rik	0.221096	1.12662	3.15232	0.357395	0.720796	0.999959	L4/5 IT Glut4	up
Insl6	0.221096	1.12662	3.15232	0.357395	0.720796	0.999959	L4/5 IT Glut4	up
Dlx4	0.221096	1.12662	3.15232	0.357395	0.720796	0.999959	L4/5 IT Glut4	up
Gm14401	2.55142	1.12528	1.09015	1.03222	0.30197	0.999959	L4/5 IT Glut4	up
Lsm11	7.56624	1.12331	0.581801	1.93075	0.0535142	0.999959	L4/5 IT Glut4	up
Trim13	1.51166	1.12324	1.42779	0.786694	0.431461	0.999959	L4/5 IT Glut4	up
Ccnd1	4.66969	1.12254	0.844821	1.32873	0.183938	0.999959	L4/5 IT Glut4	up
Vim	0.577645	1.12242	2.3923	0.469178	0.638942	0.999959	L4/5 IT Glut4	up
L3hypdh	1.69829	1.11846	1.206	0.927414	0.353712	0.999959	L4/5 IT Glut4	up
Dusp28	0.880373	1.11801	1.77858	0.628599	0.529612	0.999959	L4/5 IT Glut4	up
Agpat1	4.82371	1.11575	0.750456	1.48677	0.137076	0.999959	L4/5 IT Glut4	up
Map3k20	2.3823	1.11378	1.09191	1.02003	0.307715	0.999959	L4/5 IT Glut4	up
Znhit3	4.86072	1.11312	0.771201	1.44335	0.148921	0.999959	L4/5 IT Glut4	up
Prcd	0.705366	1.11301	1.96821	0.565492	0.571739	0.999959	L4/5 IT Glut4	up
Tbc1d8b	0.427628	1.11211	2.73427	0.40673	0.684207	0.999959	L4/5 IT Glut4	up
Zg16	0.221912	1.11157	3.15028	0.35285	0.724201	0.999959	L4/5 IT Glut4	up
Adamts14	0.221912	1.11157	3.15028	0.35285	0.724201	0.999959	L4/5 IT Glut4	up
Fzd8	0.221912	1.11157	3.15028	0.35285	0.724201	0.999959	L4/5 IT Glut4	up
Col4a5	0.221912	1.11157	3.15028	0.35285	0.724201	0.999959	L4/5 IT Glut4	up
Stk33	1.34866	1.11108	1.60936	0.690386	0.489952	0.999959	L4/5 IT Glut4	up
Eya4	0.815504	1.10937	1.84264	0.602052	0.547139	0.999959	L4/5 IT Glut4	up
Steap2	2.04796	1.10412	1.11516	0.990097	0.322127	0.999959	L4/5 IT Glut4	up
Arhgap6	0.912554	1.10335	1.7827	0.618922	0.535968	0.999959	L4/5 IT Glut4	up
Kif14	0.252238	1.10026	3.14855	0.34945	0.726751	0.999959	L4/5 IT Glut4	up
4921504E06Rik	0.252238	1.10026	3.14855	0.34945	0.726751	0.999959	L4/5 IT Glut4	up
Perm1	0.252238	1.10026	3.14855	0.34945	0.726751	0.999959	L4/5 IT Glut4	up
Vmn1r12	0.252238	1.10026	3.14855	0.34945	0.726751	0.999959	L4/5 IT Glut4	up
Olfr986	0.252238	1.10026	3.14855	0.34945	0.726751	0.999959	L4/5 IT Glut4	up
Cdca8	0.388634	1.09944	2.62174	0.419355	0.674957	0.999959	L4/5 IT Glut4	up
Mettl18	0.483624	1.0987	2.38512	0.460645	0.645053	0.999959	L4/5 IT Glut4	up
Il27	0.507099	1.09782	2.35843	0.465486	0.641583	0.999959	L4/5 IT Glut4	up
Parp10	0.507099	1.09782	2.35843	0.465486	0.641583	0.999959	L4/5 IT Glut4	up
Abca9	0.405829	1.09592	2.57471	0.425646	0.670366	0.999959	L4/5 IT Glut4	up
Gm9958	0.774855	1.09517	2.12302	0.515854	0.605956	0.999959	L4/5 IT Glut4	up
Shcbp1	0.930259	1.09418	1.60518	0.681655	0.495457	0.999959	L4/5 IT Glut4	up
Itgb1bp2	0.938971	1.09406	1.54962	0.706018	0.480177	0.999959	L4/5 IT Glut4	up
Tmem37	0.188155	1.09388	3.14745	0.347546	0.728181	0.999959	L4/5 IT Glut4	up
C8g	0.188155	1.09388	3.14745	0.347546	0.728181	0.999959	L4/5 IT Glut4	up
Prrx2	0.188155	1.09388	3.14745	0.347546	0.728181	0.999959	L4/5 IT Glut4	up
Actrt3	0.188155	1.09388	3.14745	0.347546	0.728181	0.999959	L4/5 IT Glut4	up
Zfp988	0.188155	1.09388	3.14745	0.347546	0.728181	0.999959	L4/5 IT Glut4	up
Cd36	0.188155	1.09388	3.14745	0.347546	0.728181	0.999959	L4/5 IT Glut4	up
Rasl2-9	0.188155	1.09388	3.14745	0.347546	0.728181	0.999959	L4/5 IT Glut4	up
Tead2	0.188155	1.09388	3.14745	0.347546	0.728181	0.999959	L4/5 IT Glut4	up
Sult5a1	0.188155	1.09388	3.14745	0.347546	0.728181	0.999959	L4/5 IT Glut4	up
Glb1l3	0.188155	1.09388	3.14745	0.347546	0.728181	0.999959	L4/5 IT Glut4	up
Pmel	0.188155	1.09388	3.14745	0.347546	0.728181	0.999959	L4/5 IT Glut4	up
Mapk15	0.188155	1.09388	3.14745	0.347546	0.728181	0.999959	L4/5 IT Glut4	up
Muc13	0.188155	1.09388	3.14745	0.347546	0.728181	0.999959	L4/5 IT Glut4	up
Acrv1	0.188155	1.09388	3.14745	0.347546	0.728181	0.999959	L4/5 IT Glut4	up
Dusp10	0.196456	1.09333	3.14771	0.347341	0.72833481994637606	0.999959	L4/5 IT Glut4	up
Ppp1r14a	0.196456	1.09333	3.14771	0.347341	0.72833481994637606	0.999959	L4/5 IT Glut4	up
Fam92b	0.196456	1.09333	3.14771	0.347341	0.72833481994637606	0.999959	L4/5 IT Glut4	up
Gm10999	0.196456	1.09333	3.14771	0.347341	0.72833481994637606	0.999959	L4/5 IT Glut4	up
Fignl1	0.196456	1.09333	3.14771	0.347341	0.72833481994637606	0.999959	L4/5 IT Glut4	up
Slc5a10	0.196456	1.09333	3.14771	0.347341	0.72833481994637606	0.999959	L4/5 IT Glut4	up
P2rx5	0.196456	1.09333	3.14771	0.347341	0.72833481994637606	0.999959	L4/5 IT Glut4	up
Ikzf3	0.196456	1.09333	3.14771	0.347341	0.72833481994637606	0.999959	L4/5 IT Glut4	up
Ahnak2	0.196456	1.09333	3.14771	0.347341	0.72833481994637606	0.999959	L4/5 IT Glut4	up
Mcidas	0.196456	1.09333	3.14771	0.347341	0.72833481994637606	0.999959	L4/5 IT Glut4	up
Cd200r3	0.196456	1.09333	3.14771	0.347341	0.72833481994637606	0.999959	L4/5 IT Glut4	up
Clic1	0.196456	1.09333	3.14771	0.347341	0.72833481994637606	0.999959	L4/5 IT Glut4	up
Ly6g5b	0.196456	1.09333	3.14771	0.347341	0.72833481994637606	0.999959	L4/5 IT Glut4	up
C1qbp	3.81974	1.09315	0.830582	1.31613	0.188132	0.999959	L4/5 IT Glut4	up
Col9a2	0.683087	1.09234	2.08197	0.524666	0.599815	0.999959	L4/5 IT Glut4	up
Hexim1	2.53271	1.08678	1.01799	1.06757	0.285714	0.999959	L4/5 IT Glut4	up
Mrpl32	3.95412	1.086	0.845262	1.28481	0.19886	0.999959	L4/5 IT Glut4	up
Dcst1	0.335889	1.08585	2.74864	0.395048	0.692807	0.999959	L4/5 IT Glut4	up
Sox6	2.51443	1.08548	1.23151	0.881416	0.378093	0.999959	L4/5 IT Glut4	up
Acsm3	0.226781	1.08391	3.14619	0.344517	0.730458	0.999959	L4/5 IT Glut4	up
1700067K01Rik	0.226781	1.08391	3.14619	0.344517	0.730458	0.999959	L4/5 IT Glut4	up
Gm45194	0.226781	1.08391	3.14619	0.344517	0.730458	0.999959	L4/5 IT Glut4	up
Kctd12b	0.226781	1.08391	3.14619	0.344517	0.730458	0.999959	L4/5 IT Glut4	up
Oc90	0.363177	1.08313	2.67875	0.404343	0.685961	0.999959	L4/5 IT Glut4	up
Adam4	0.840764	1.08146	1.78509	0.605831	0.544627	0.999959	L4/5 IT Glut4	up
St8sia2	2.69281	1.0814	1.00408	1.077	0.281481	0.999959	L4/5 IT Glut4	up
Slc17a9	1.20537	1.08132	1.47431	0.733444	0.463288	0.999959	L4/5 IT Glut4	up
Arhgdib	0.843968	1.08119	2.03821	0.530459	0.595793	0.999959	L4/5 IT Glut4	up
Col6a2	0.526713	1.08013	2.51895	0.4288	0.668069	0.999959	L4/5 IT Glut4	up
Sept1	2.70999	1.08003	1.00134	1.07858	0.280773	0.999959	L4/5 IT Glut4	up
Slc16a13	1.0743	1.07974	1.63166	0.66174	0.508138	0.999959	L4/5 IT Glut4	up
Rilp	0.372072	1.07881	2.65488	0.40635098439198297	0.684485	0.999959	L4/5 IT Glut4	up
4932438H23Rik	0.372072	1.07881	2.65488	0.40635098439198297	0.684485	0.999959	L4/5 IT Glut4	up
Tex29	0.162699	1.07861	3.1452	0.342937	0.731645	0.999959	L4/5 IT Glut4	up
Ggt5	0.162699	1.07861	3.1452	0.342937	0.731645	0.999959	L4/5 IT Glut4	up
Smtn	0.162699	1.07861	3.1452	0.342937	0.731645	0.999959	L4/5 IT Glut4	up
Myocd	0.162699	1.07861	3.1452	0.342937	0.731645	0.999959	L4/5 IT Glut4	up
Eme1	0.162699	1.07861	3.1452	0.342937	0.731645	0.999959	L4/5 IT Glut4	up
Tac4	0.162699	1.07861	3.1452	0.342937	0.731645	0.999959	L4/5 IT Glut4	up
Cd300a	0.162699	1.07861	3.1452	0.342937	0.731645	0.999959	L4/5 IT Glut4	up
Lrrc9	0.162699	1.07861	3.1452	0.342937	0.731645	0.999959	L4/5 IT Glut4	up
Cdhr2	0.162699	1.07861	3.1452	0.342937	0.731645	0.999959	L4/5 IT Glut4	up
Cdh24	0.162699	1.07861	3.1452	0.342937	0.731645	0.999959	L4/5 IT Glut4	up
2610318N02Rik	0.162699	1.07861	3.1452	0.342937	0.731645	0.999959	L4/5 IT Glut4	up
Samsn1	0.162699	1.07861	3.1452	0.342937	0.731645	0.999959	L4/5 IT Glut4	up
Slc14a1	0.162699	1.07861	3.1452	0.342937	0.731645	0.999959	L4/5 IT Glut4	up
Catsperg2	0.162699	1.07861	3.1452	0.342937	0.731645	0.999959	L4/5 IT Glut4	up
Crybb3	1.61923	1.0772	1.33526	0.806736	0.419819	0.999959	L4/5 IT Glut4	up
Kyat3	1.17175	1.07672	1.51939	0.708649	0.478542	0.999959	L4/5 IT Glut4	up
Tha1	2.28532	1.07645	1.05546	1.01989	0.307782	0.999959	L4/5 IT Glut4	up
Tcf24	0.396506	1.07554	2.59574	0.414349	0.678619	0.999959	L4/5 IT Glut4	up
Loxhd1	0.396506	1.07554	2.59574	0.414349	0.678619	0.999959	L4/5 IT Glut4	up
Enthd1	0.336706	1.07342	2.74428	0.391149	0.695687	0.999959	L4/5 IT Glut4	up
Hps6	0.501857	1.07114	2.38299	0.449493	0.653076	0.999959	L4/5 IT Glut4	up
Mndal	0.227598	1.07111	3.14441	0.34064	0.733374	0.999959	L4/5 IT Glut4	up
Cyb5rl	0.227598	1.07111	3.14441	0.34064	0.733374	0.999959	L4/5 IT Glut4	up
4933405L10Rik	0.227598	1.07111	3.14441	0.34064	0.733374	0.999959	L4/5 IT Glut4	up
Stac	0.227598	1.07111	3.14441	0.34064	0.733374	0.999959	L4/5 IT Glut4	up
Cdh23	0.227598	1.07111	3.14441	0.34064	0.733374	0.999959	L4/5 IT Glut4	up
3110001I22Rik	0.227598	1.07111	3.14441	0.34064	0.733374	0.999959	L4/5 IT Glut4	up
Ptprcap	0.227598	1.07111	3.14441	0.34064	0.733374	0.999959	L4/5 IT Glut4	up
Kank1	0.227598	1.07111	3.14441	0.34064	0.733374	0.999959	L4/5 IT Glut4	up
Srl	4.89212	1.06982	0.716904	1.49227	0.135628	0.999959	L4/5 IT Glut4	up
Fibp	8.27491	1.06731	0.556448	1.91807	0.0551018	0.999959	L4/5 IT Glut4	up
Gm20721	4.57837	1.06623	0.751765	1.41831	0.156101	0.999959	L4/5 IT Glut4	up
Slco6c1	0.163515	1.06572	3.14343	0.339032	0.734585	0.999959	L4/5 IT Glut4	up
Crybb1	0.163515	1.06572	3.14343	0.339032	0.734585	0.999959	L4/5 IT Glut4	up
Ppp1r35	0.163515	1.06572	3.14343	0.339032	0.734585	0.999959	L4/5 IT Glut4	up
Vmn1r26	0.163515	1.06572	3.14343	0.339032	0.734585	0.999959	L4/5 IT Glut4	up
Bcam	0.163515	1.06572	3.14343	0.339032	0.734585	0.999959	L4/5 IT Glut4	up
Zfp526	0.163515	1.06572	3.14343	0.339032	0.734585	0.999959	L4/5 IT Glut4	up
Dynlrb2	0.163515	1.06572	3.14343	0.339032	0.734585	0.999959	L4/5 IT Glut4	up
Hmga2	0.163515	1.06572	3.14343	0.339032	0.734585	0.999959	L4/5 IT Glut4	up
Traf4	0.163515	1.06572	3.14343	0.339032	0.734585	0.999959	L4/5 IT Glut4	up
Tbx21	0.163515	1.06572	3.14343	0.339032	0.734585	0.999959	L4/5 IT Glut4	up
Cd7	0.163515	1.06572	3.14343	0.339032	0.734585	0.999959	L4/5 IT Glut4	up
Nid1	0.163515	1.06572	3.14343	0.339032	0.734585	0.999959	L4/5 IT Glut4	up
Serpinb1b	0.163515	1.06572	3.14343	0.339032	0.734585	0.999959	L4/5 IT Glut4	up
Pitx1	0.163515	1.06572	3.14343	0.339032	0.734585	0.999959	L4/5 IT Glut4	up
1700066B19Rik	0.163515	1.06572	3.14343	0.339032	0.734585	0.999959	L4/5 IT Glut4	up
Mdp1	3.79014	1.06534	0.8581	1.24151	0.214416	0.999959	L4/5 IT Glut4	up
Rarres1	0.367031	1.06501	2.65586	0.401004	0.688417	0.999959	L4/5 IT Glut4	up
Rfxank	2.08126	1.06484	1.24991	0.851932	0.394252	0.999959	L4/5 IT Glut4	up
Tcf7	0.798314	1.06454	1.79698	0.592404	0.55358	0.999959	L4/5 IT Glut4	up
Zfp330	7.47204	1.06382	0.605824	1.75599	0.0790909	0.999959	L4/5 IT Glut4	up
Zfp619	1.0804	1.06204	1.59916	0.664122	0.506612	0.999959	L4/5 IT Glut4	up
Shc4	1.80739	1.06092	1.18807	0.89298	0.371868	0.999959	L4/5 IT Glut4	up
Gng13	1.48274	1.05925	1.49787	0.707171	0.47946038400352903	0.999959	L4/5 IT Glut4	up
Tnfaip8l3	0.622083	1.05919	2.3673	0.447424	0.654569	0.999959	L4/5 IT Glut4	up
Lbhd1	0.411514	1.05654	2.5503	0.414279	0.67867	0.999959	L4/5 IT Glut4	up
Camk2n2	6.7225	1.0561	0.668944	1.57876	0.114392	0.999959	L4/5 IT Glut4	up
Phf19	0.193841	1.056	3.1419	0.336102	0.736794	0.999959	L4/5 IT Glut4	up
C2cd4d	0.193841	1.056	3.1419	0.336102	0.736794	0.999959	L4/5 IT Glut4	up
Ccdc96	0.193841	1.056	3.1419	0.336102	0.736794	0.999959	L4/5 IT Glut4	up
Tacr1	0.193841	1.056	3.1419	0.336102	0.736794	0.999959	L4/5 IT Glut4	up
Ankle1	0.193841	1.056	3.1419	0.336102	0.736794	0.999959	L4/5 IT Glut4	up
St3gal1	0.193841	1.056	3.1419	0.336102	0.736794	0.999959	L4/5 IT Glut4	up
Tubb6	0.193841	1.056	3.1419	0.336102	0.736794	0.999959	L4/5 IT Glut4	up
Arhgap31	11.8116	1.05446	0.56482	1.8669	0.0619153	0.999959	L4/5 IT Glut4	up
Lrrc17	0.633807	1.05374	2.15708	0.488504	0.625193	0.999959	L4/5 IT Glut4	up
Ppp3r2	0.347432	1.05236	2.71365	0.387802	0.698163	0.999959	L4/5 IT Glut4	up
Ears2	3.59103	1.05195	0.857654	1.22654	0.219996	0.999959	L4/5 IT Glut4	up
Snrnp35	2.35814	1.0497	0.99627	1.05363	0.292052	0.999959	L4/5 IT Glut4	up
Tnfaip8l1	1.70091	1.04902	1.26098	0.83191	0.40546	0.999959	L4/5 IT Glut4	up
Ptk7	2.08237	1.04893	1.13337	0.92549	0.354711	0.999959	L4/5 IT Glut4	up
Slc25a15	0.998185	1.04891	1.56463	0.670391	0.502608	0.999959	L4/5 IT Glut4	up
Rbm43	3.63775	1.04859	0.861198	1.21759	0.223379	0.999959	L4/5 IT Glut4	up
Rfc4	1.58633	1.0481	1.27588	0.821468	0.41138	0.999959	L4/5 IT Glut4	up
Rpp38	2.92618	1.04773	0.954157	1.09807	0.272174	0.999959	L4/5 IT Glut4	up
Faap100	5.45231	1.04725	0.731731	1.4312	0.152373	0.999959	L4/5 IT Glut4	up
Gstm4	0.529899	1.04409	2.30544	0.452882	0.650634	0.999959	L4/5 IT Glut4	up
Mea1	0.529899	1.04409	2.30544	0.452882	0.650634	0.999959	L4/5 IT Glut4	up
Raly	3.60108	1.04312	0.842935	1.23749	0.215905	0.999959	L4/5 IT Glut4	up
Dpm3	1.85165	1.04165	1.2354	0.84317	0.399134	0.999959	L4/5 IT Glut4	up
Misp	0.311249	1.04053	2.84854	0.365287	0.714897	0.999959	L4/5 IT Glut4	up
Mt1	3.6036	1.0405	1.01112	1.02906	0.303451	0.999959	L4/5 IT Glut4	up
Zfp599	1.96811	1.04043	1.20681	0.862129	0.388616	0.999959	L4/5 IT Glut4	up
Gosr2	8.92156	1.04029	0.535413	1.94297	0.0520195	0.999959	L4/5 IT Glut4	up
4930556J24Rik	6.494	1.03971	0.641441	1.6209	0.105039	0.999959	L4/5 IT Glut4	up
Psat1	1.06993	1.03965	1.57747	0.659062	0.509856	0.999959	L4/5 IT Glut4	up
Gm10778	1.16147	1.03949	1.47903	0.702816	0.48217	0.999959	L4/5 IT Glut4	up
Pnp	1.44324	1.03935	1.39116	0.747111	0.454997	0.999959	L4/5 IT Glut4	up
Pm20d2	0.754258	1.03861	1.81125	0.573421	0.566359	0.999959	L4/5 IT Glut4	up
Metrn	0.402192	1.03839	2.57055	0.403957	0.686244	0.999959	L4/5 IT Glut4	up
Tgm4	1.481	1.03618	1.32276	0.783349	0.433422	0.999959	L4/5 IT Glut4	up
Ccdc80	2.7322	1.03522	1.02255	1.01239	0.311353	0.999959	L4/5 IT Glut4	up
Pemt	1.65321	1.03436	1.3429	0.770245	0.441154	0.999959	L4/5 IT Glut4	up
Gm13306	0.341575	1.03241	2.75056	0.375343	0.707405	0.999959	L4/5 IT Glut4	up
Dab2	0.341575	1.03241	2.75056	0.375343	0.707405	0.999959	L4/5 IT Glut4	up
Qrfpr	2.18112	1.03003	1.15614	0.890918	0.372973	0.999959	L4/5 IT Glut4	up
Itga9	2.09306	1.02983	1.15977	0.887963	0.374561	0.999959	L4/5 IT Glut4	up
Gpr37l1	1.63375	1.02912	1.4705	0.699847	0.484023	0.999959	L4/5 IT Glut4	up
Tfap4	0.376945	1.02618	2.84767	0.360357	0.71858	0.999959	L4/5 IT Glut4	up
Sox8	2.97679	1.0227	1.05466	0.969701	0.332195	0.999959	L4/5 IT Glut4	up
Cat	3.31792	1.02243	0.880018	1.16183	0.245305	0.999959	L4/5 IT Glut4	up
Bid	1.88122	1.02217	1.3647	0.749007	0.453853	0.999959	L4/5 IT Glut4	up
Ntsr2	0.602079	1.01965	2.36056	0.431952	0.665776	0.999959	L4/5 IT Glut4	up
Samd15	3.53304	1.01892	0.853255	1.19416	0.232415	0.999959	L4/5 IT Glut4	up
Alg2	7.03965	1.01874	0.599087	1.70049	0.0890397	0.999959	L4/5 IT Glut4	up
Pcdhga2	0.602876	1.01864	1.98754	0.512514	0.608291	0.999959	L4/5 IT Glut4	up
Psme2	1.39045	1.01549	1.31397	0.772841	0.439616	0.999959	L4/5 IT Glut4	up
Megf11	5.49706	1.01492	0.705119	1.43936	0.150047	0.999959	L4/5 IT Glut4	up
Arhgef15	3.60884	1.0147	0.884598	1.14708	0.25135	0.999959	L4/5 IT Glut4	up
Efcab11	0.437596	1.01417	2.68329	0.377956	0.705464	0.999959	L4/5 IT Glut4	up
Cbx2	0.682346	1.0127	2.01056	0.503692	0.614478	0.999959	L4/5 IT Glut4	up
Slpi	0.457585	1.01221	2.65732	0.380913	0.703268	0.999959	L4/5 IT Glut4	up
Gpr35	0.741366	1.0114	1.85009	0.546679	0.5846	0.999959	L4/5 IT Glut4	up
Zfp65	5.30988	1.00997	0.706708	1.42913	0.152968	0.999959	L4/5 IT Glut4	up
Kcnh6	0.411494	1.00969	2.7259	0.370406	0.71108	0.999959	L4/5 IT Glut4	up
Wdr64	1.00799	1.00953	3.08745	0.326978	0.743685	0.999959	L4/5 IT Glut4	up
Soat2	0.755098	1.00736	1.8283268902910501	0.550971	0.581653	0.999959	L4/5 IT Glut4	up
Tll1	10.0232	1.00712	0.559856	1.79889	0.0720356	0.999959	L4/5 IT Glut4	up
Gpr183	1.65841	1.00548	1.2381	0.812118	0.416724	0.999959	L4/5 IT Glut4	up
Scara3	0.502626	1.0054	2.53058	0.397299	0.691147	0.999959	L4/5 IT Glut4	up
Rps6ka4	1.30601	1.00484	1.36011	0.738794	0.460032	0.999959	L4/5 IT Glut4	up
Card9	0.773501	1.00476	2.01595	0.498403	0.6182	0.999959	L4/5 IT Glut4	up
Klra2	0.645947	1.00157	2.03654	0.491798	0.622862	0.999959	L4/5 IT Glut4	up
Gypc	0.871279	1.0013	1.85836	0.538807	0.59002	0.999959	L4/5 IT Glut4	up
Pdzd11	4.76073	1.00023	0.815929	1.22587	0.220246	0.999959	L4/5 IT Glut4	up
Foxr2	0.471531	0.998503	2.63344	0.379162	0.704567	0.999959	L4/5 IT Glut4	up
Asb12	1.29576	0.997406	1.43356	0.695754	0.486583	0.999959	L4/5 IT Glut4	up
Ehhadh	0.690805	0.996471	1.98535	0.501912	0.615729	0.999959	L4/5 IT Glut4	up
Cmtm8	0.432707	0.995584	2.68702	0.370516	0.710998	0.999959	L4/5 IT Glut4	up
Abracl	7.01985	0.995288	0.596948	1.66729	0.095456	0.999959	L4/5 IT Glut4	up
Dut	4.72509	0.995204	0.792031	1.25652	0.208927	0.999959	L4/5 IT Glut4	up
Socs1	0.628762	0.993443	2.16834	0.458159	0.646838	0.999959	L4/5 IT Glut4	up
Ccna2	0.486025	0.993152	2.5913	0.383264	0.701524	0.999959	L4/5 IT Glut4	up
Lrrd1	0.797097	0.991923	1.75827	0.564147	0.572654	0.999959	L4/5 IT Glut4	up
Pcdhb4	0.680713	0.989432	2.0094	0.492402	0.622435	0.999959	L4/5 IT Glut4	up
Alkbh7	1.63765	0.988957	1.22876	0.804844	0.420909	0.999959	L4/5 IT Glut4	up
Apoa1	0.612789	0.985992	2.05197	0.48051	0.630865	0.999959	L4/5 IT Glut4	up
Pld5	10.4434	0.985494	0.535659	1.83978	0.065801	0.999959	L4/5 IT Glut4	up
Pth1r	0.999214	0.984408	1.52562	0.645251	0.518765	0.999959	L4/5 IT Glut4	up
Proca1	2.46729	0.984236	0.996912	0.987285	0.323503	0.999959	L4/5 IT Glut4	up
Gm10762	0.795348	0.983373	2.14164	0.459168	0.646114	0.999959	L4/5 IT Glut4	up
Dmac1	1.37048	0.981855	1.45113	0.676613	0.498652	0.999959	L4/5 IT Glut4	up
Cacna2d2	0.620662	0.981544	2.03032	0.483444	0.628781	0.999959	L4/5 IT Glut4	up
Dnaaf2	1.06594	0.981543	1.57833	0.621886	0.534017	0.999959	L4/5 IT Glut4	up
Twsg1	6.12548	0.978491	0.654388	1.49528	0.134842	0.999959	L4/5 IT Glut4	up
D030056L22Rik	2.15423	0.977303	1.08433	0.901293	0.367432	0.999959	L4/5 IT Glut4	up
Psme1	2.13438	0.976949	1.07831	0.905999	0.364937	0.999959	L4/5 IT Glut4	up
Col20a1	3.72865	0.976693	0.820541	1.1903	0.233927	0.999959	L4/5 IT Glut4	up
Gpr75	2.29446	0.976238	1.02532	0.952134	0.341029	0.999959	L4/5 IT Glut4	up
Clba1	2.38649	0.974508	1.02483	0.950901	0.341655	0.999959	L4/5 IT Glut4	up
Ccdc177	4.33193	0.973607	0.7764	1.254	0.209841	0.999959	L4/5 IT Glut4	up
Mindy4b-ps	0.650365	0.973289	1.92827	0.504748	0.613736	0.999959	L4/5 IT Glut4	up
Opn1mw	0.404017	0.972085	2.78282	0.349317	0.726851	0.999959	L4/5 IT Glut4	up
Pcdha5	1.31018	0.969657	1.44735	0.669952	0.502888	0.999959	L4/5 IT Glut4	up
Msl3l2	2.51045	0.968897	1.18841	0.81529	0.414906	0.999959	L4/5 IT Glut4	up
Rps19bp1	1.33083	0.96838485300741906	1.30906	0.739754	0.459449	0.999959	L4/5 IT Glut4	up
Mrpl28	3.07247	0.967084	0.953171	1.0146	0.310298	0.999959	L4/5 IT Glut4	up
Kcnk6	2.10176	0.966951	1.17799	0.820847	0.411734	0.999959	L4/5 IT Glut4	up
Selenop	0.89769	0.964848	1.81446	0.531756	0.594895	0.999959	L4/5 IT Glut4	up
Pheta1	1.68451	0.964422	1.17978	0.817463	0.413664	0.999959	L4/5 IT Glut4	up
Tomm6	6.03285	0.963565	0.693023	1.39038	0.164413	0.999959	L4/5 IT Glut4	up
Gm3696	3.23667	0.96297	0.958799	1.00435	0.31521	0.999959	L4/5 IT Glut4	up
Uap1l1	0.688298	0.962903	2.11611	0.455034	0.649084	0.999959	L4/5 IT Glut4	up
Nanos3	2.44085	0.962652	1.03139	0.933356	0.350636	0.999959	L4/5 IT Glut4	up
Ribc1	1.27205	0.961373	1.44713	0.664333	0.506477	0.999959	L4/5 IT Glut4	up
Zfp658	2.13001	0.96048	1.13443	0.846661	0.397184	0.999959	L4/5 IT Glut4	up
Gadl1	6.595	0.960409	0.72384	1.32683	0.184566	0.999959	L4/5 IT Glut4	up
Nol6	5.1422	0.960327	0.702448	1.36711	0.17159	0.999959	L4/5 IT Glut4	up
Jrk	0.641482	0.959965	2.346	0.409191	0.682399	0.999959	L4/5 IT Glut4	up
Efhc1	0.96439	0.959856	1.6828521353855601	0.570374	0.568424	0.999959	L4/5 IT Glut4	up
Themis	0.663581	0.959226	2.30943	0.415351	0.677885	0.999959	L4/5 IT Glut4	up
Tnnc1	14.422	0.959135	0.461516	2.07823	0.0376883	0.999959	L4/5 IT Glut4	up
Lrrc55	5.59059	0.959003	0.655369	1.4633	0.143385	0.999959	L4/5 IT Glut4	up
Ubald1	7.38628	0.957677	0.619455	1.546	0.122105	0.999959	L4/5 IT Glut4	up
Sstr2	1.8949	0.957344	1.17244	0.816542	0.41419	0.999959	L4/5 IT Glut4	up
Hcn3	6.4184	0.95722	0.630476	1.51825	0.128951	0.999959	L4/5 IT Glut4	up
Pycr2	3.83821	0.955662	0.844891	1.13111	0.25801	0.999959	L4/5 IT Glut4	up
Anapc11	5.73624	0.952854	0.668993	1.42431	0.154356	0.999959	L4/5 IT Glut4	up
Ttc30a1	0.776447	0.951059	1.79853	0.528798	0.596945	0.999959	L4/5 IT Glut4	up
Acads	1.41433	0.949209	1.3845	0.685599	0.492966	0.999959	L4/5 IT Glut4	up
Msc	0.927837	0.948846	1.74333	0.544271	0.586255	0.999959	L4/5 IT Glut4	up
Depdc1a	0.194638	0.947478	3.14048	0.301698	0.762882	0.999959	L4/5 IT Glut4	up
Trim54	0.194638	0.947478	3.14048	0.301698	0.762882	0.999959	L4/5 IT Glut4	up
Dll3	0.194638	0.947478	3.14048	0.301698	0.762882	0.999959	L4/5 IT Glut4	up
Unc5b	0.194638	0.947478	3.14048	0.301698	0.762882	0.999959	L4/5 IT Glut4	up
Hist1h4i	0.194638	0.947478	3.14048	0.301698	0.762882	0.999959	L4/5 IT Glut4	up
Med22	1.02263	0.945409	1.74145	0.542885	0.587209	0.999959	L4/5 IT Glut4	up
Pno1	1.12208	0.944639	1.48423	0.636452	0.524482	0.999959	L4/5 IT Glut4	up
Igsf6	2.55267	0.943017	1.11872	0.842943	0.39926	0.999959	L4/5 IT Glut4	up
Nol9	7.37853	0.941122	0.621421	1.51447	0.129907	0.999959	L4/5 IT Glut4	up
Syne3	3.08371	0.941002	0.954204	0.986164	0.324053	0.999959	L4/5 IT Glut4	up
Cyb561d1	5.5362	0.938623	0.700591	1.33976	0.180323	0.999959	L4/5 IT Glut4	up
Zfhx3	0.957399	0.937483	1.76266	0.531856	0.594826	0.999959	L4/5 IT Glut4	up
Ung	0.438393	0.936748	2.69255	0.347904	0.727912	0.999959	L4/5 IT Glut4	up
Mthfd2	4.72732	0.936274	0.727827	1.2864	0.198305	0.999959	L4/5 IT Glut4	up
Sugct	4.00356	0.93533	0.914884	1.02235	0.306616	0.999959	L4/5 IT Glut4	up
Clec3b	1.30538	0.934848	1.32429	0.705923	0.480236	0.999959	L4/5 IT Glut4	up
Vwa5b1	3.05223	0.933185	0.94679	0.985631	0.324314	0.999959	L4/5 IT Glut4	up
Dhx34	4.14046	0.933117	0.779819	1.19658	0.23147	0.999959	L4/5 IT Glut4	up
Ptprz1	5.73707	0.93104	0.730189	1.27507	0.202286	0.999959	L4/5 IT Glut4	up
Ecm1	1.53959	0.930669	1.23796	0.751777	0.452185	0.999959	L4/5 IT Glut4	up
Adam5	0.402988	0.930427	2.77222	0.335625	0.737154	0.999959	L4/5 IT Glut4	up
Nus1	13.5089	0.930063	0.450381	2.06506	0.0389174	0.999959	L4/5 IT Glut4	up
Ccdc38	1.67945	0.92969	1.29271	0.719179	0.472031	0.999959	L4/5 IT Glut4	up
Hmgn2	3.73697	0.928972	0.89065	1.04303	0.296936	0.999959	L4/5 IT Glut4	up
Hist1h1e	0.683674	0.92866	1.9745	0.470328	0.638121	0.999959	L4/5 IT Glut4	up
Zfp14	3.555	0.927936	0.966054	0.960543	0.336782	0.999959	L4/5 IT Glut4	up
Ermn	0.337293	0.927743	2.98546	0.310754	0.755988	0.999959	L4/5 IT Glut4	up
Podn	0.337293	0.927743	2.98546	0.310754	0.755988	0.999959	L4/5 IT Glut4	up
Zfp981	0.337293	0.927743	2.98546	0.310754	0.755988	0.999959	L4/5 IT Glut4	up
Nanos1	2.44669	0.927456	1.01166	0.916766	0.359265	0.999959	L4/5 IT Glut4	up
Phyh	7.09197	0.926844	0.610323	1.51861	0.12886	0.999959	L4/5 IT Glut4	up
Zfp428	1.18064	0.926733	1.52781	0.606577	0.544132	0.999959	L4/5 IT Glut4	up
Pex12	1.38291	0.924428	1.43729	0.643177	0.52011	0.999959	L4/5 IT Glut4	up
Ndufb10	6.64234	0.923628	0.649695	1.42163	0.155133	0.999959	L4/5 IT Glut4	up
Plekhb1	1.95765	0.922402	1.28035	0.720428	0.471261	0.999959	L4/5 IT Glut4	up
Ifit3	0.518379	0.922095	2.50274	0.368433	0.71255	0.999959	L4/5 IT Glut4	up
Baz1a	5.19977	0.921625	0.79881	1.15375	0.248604	0.999959	L4/5 IT Glut4	up
Pex11g	0.872126	0.921408	1.81999	0.506272	0.612665	0.999959	L4/5 IT Glut4	up
Piga	4.76853	0.921228	0.734554	1.25413	0.209794	0.999959	L4/5 IT Glut4	up
Fst	1.86516	0.920333	1.21031	0.760414	0.447007	0.999959	L4/5 IT Glut4	up
Fbxw10	1.33028	0.920272	1.44229	0.638062	0.523433	0.999959	L4/5 IT Glut4	up
Ddt	0.899375	0.918828	1.8706	0.491194	0.623289	0.999959	L4/5 IT Glut4	up
Rs1	1.40556	0.918613	1.32095	0.695421	0.486792	0.999959	L4/5 IT Glut4	up
Nom1	16.3384	0.918183	0.402866	2.27913	0.0226595	0.999959	L4/5 IT Glut4	up
Cd59a	1.33855	0.918121	1.35272	0.678722	0.497314	0.999959	L4/5 IT Glut4	up
Plcd4	0.56247	0.918103	2.40911	0.381096	0.703132	0.999959	L4/5 IT Glut4	up
Rinl	0.811226	0.917433	1.66411	0.551305	0.581425	0.999959	L4/5 IT Glut4	up
Gm29666	3.65509	0.916322	0.868345	1.05525	0.291311	0.999959	L4/5 IT Glut4	up
Haus1	3.24233	0.915952	0.919613	0.996019	0.319241	0.999959	L4/5 IT Glut4	up
Tufm	1.31102	0.915806	1.47522	0.620792	0.534736	0.999959	L4/5 IT Glut4	up
Meis1	1.00672	0.915104	1.58767	0.576382	0.564357	0.999959	L4/5 IT Glut4	up
Tnfsf8	0.386885	0.914448	3.13667	0.291535	0.770642	0.999959	L4/5 IT Glut4	up
Tinf2	2.85262	0.914228	0.99185	0.92174	0.356664	0.999959	L4/5 IT Glut4	up
Ppp1r26	3.11439	0.914148	0.949695	0.96257	0.335763	0.999959	L4/5 IT Glut4	up
Galnt14	70.0176	0.913238	0.406602	2.24603	0.0247023	0.999959	L4/5 IT Glut4	up
Grik3	5.49479	0.913073	0.799381	1.14223	0.25336	0.999959	L4/5 IT Glut4	up
Nudt2	2.95191	0.912888	0.892477	1.02287	0.306369	0.999959	L4/5 IT Glut4	up
Dtx3l	0.343188	0.912635	2.96526	0.307776	0.758253	0.999959	L4/5 IT Glut4	up
Ust	10.11	0.912047	0.525212	1.73653	0.0824695	0.999959	L4/5 IT Glut4	up
R3hcc1	1.71403	0.909958	1.24612	0.730235	0.465247	0.999959	L4/5 IT Glut4	up
Htr1b	0.362749	0.907455	2.90672	0.312192	0.754895	0.999959	L4/5 IT Glut4	up
Noa1	4.40305	0.907411	0.78176	1.16073	0.245753	0.999959	L4/5 IT Glut4	up
Galnt3	7.39701	0.907057	0.603553	1.50286	0.132875	0.999959	L4/5 IT Glut4	up
Scd3	0.838369	0.906205	1.83931	0.492689	0.622232	0.999959	L4/5 IT Glut4	up
Fam71e1	1.99268	0.905431	1.18384	0.764824	0.444377	0.999959	L4/5 IT Glut4	up
Mrm1	2.38096	0.905326	1.08637	0.833349	0.404648	0.999959	L4/5 IT Glut4	up
Tmem109	8.38456	0.905062	0.568055	1.59327	0.1111	0.999959	L4/5 IT Glut4	up
Mrpl41	12.8318	0.903148	0.492606	1.83341	0.0667418	0.999959	L4/5 IT Glut4	up
Thnsl2	0.57541	0.902598	2.42066	0.372873	0.709243	0.999959	L4/5 IT Glut4	up
Zbtb33	1.99516	0.90249	1.13825	0.792874	0.427851	0.999959	L4/5 IT Glut4	up
Gga1	16.9093	0.899527	0.389981	2.30659	0.0210776	0.999959	L4/5 IT Glut4	up
Sertad1	3.44711	0.899144	0.841111	1.069	0.285071	0.999959	L4/5 IT Glut4	up
Pcdhga3	0.484622	0.899046	2.5663	0.350327	0.726093	0.999959	L4/5 IT Glut4	up
Bub1b	1.75484	0.899037	1.16844	0.769436	0.441634	0.999959	L4/5 IT Glut4	up
Casp3	3.02361	0.898169	0.940464	0.955028	0.339564	0.999959	L4/5 IT Glut4	up
Mapkapk5	0.857098	0.897401	1.73207	0.518109	0.604382	0.999959	L4/5 IT Glut4	up
Gulp1	0.523046	0.896151	2.5085	0.357247	0.720907	0.999959	L4/5 IT Glut4	up
Zbtb2	12.5515	0.895363	0.480465	1.86353	0.062387	0.999959	L4/5 IT Glut4	up
Smarcd2	3.79826	0.894899	0.871756	1.02655	0.304633	0.999959	L4/5 IT Glut4	up
Fbxl13	1.34276	0.893743	1.37666	0.649211	0.516202	0.999959	L4/5 IT Glut4	up
Ssc5d	1.79246	0.893272	1.15659	0.772335	0.439916	0.999959	L4/5 IT Glut4	up
Pnldc1	5.44782	0.891785	0.689419	1.29353	0.195827	0.999959	L4/5 IT Glut4	up
Leo1	5.04452	0.890902	0.732722	1.21588	0.224031	0.999959	L4/5 IT Glut4	up
Pudp	0.395116	0.89067	2.77927	0.320469	0.748613	0.999959	L4/5 IT Glut4	up
Mafb	0.98883	0.890432	1.69548	0.52518	0.599458	0.999959	L4/5 IT Glut4	up
Rtn4rl2	9.19031	0.88954	0.578029	1.53892	0.123824	0.999959	L4/5 IT Glut4	up
Prorsd1	1.60623	0.88498	1.29684	0.682414	0.494977	0.999959	L4/5 IT Glut4	up
Map3k19	0.785559	0.883364	1.74166	0.507197	0.612016	0.999959	L4/5 IT Glut4	up
Dcbld1	6.22332	0.882186	0.634839	1.38962	0.164644	0.999959	L4/5 IT Glut4	up
Mrc2	6.98858	0.880704	0.610869	1.44172	0.14938	0.999959	L4/5 IT Glut4	up
Zkscan14	2.23016	0.879436	1.03938	0.846114	0.397489	0.999959	L4/5 IT Glut4	up
Hspa1a	0.385804	0.878772	2.59884	0.338141	0.735257	0.999959	L4/5 IT Glut4	up
Mis18bp1	0.731401	0.876777	1.8178	0.482328	0.629573	0.999959	L4/5 IT Glut4	up
Hacl1	1.12409	0.874321	1.43022	0.611321	0.540987	0.999959	L4/5 IT Glut4	up
Traf2	3.24725	0.87317	1.01851	0.857304	0.391277	0.999959	L4/5 IT Glut4	up
Ethe1	4.48366	0.872811	0.777286	1.1229	0.261481	0.999959	L4/5 IT Glut4	up
Six4	1.7195	0.87142	1.2084	0.721136	0.470826	0.999959	L4/5 IT Glut4	up
Sh3yl1	9.98637	0.871078	0.513705	1.69568	0.0899472	0.999959	L4/5 IT Glut4	up
Olfr1033	1.15787	0.869935	1.49584	0.581568	0.560857	0.999959	L4/5 IT Glut4	up
Klhl41	0.999425	0.869889	1.59064	0.546881	0.584461	0.999959	L4/5 IT Glut4	up
Pgpep1	1.47009	0.867837	1.25964	0.688956	0.490851	0.999959	L4/5 IT Glut4	up
Acta1	2.19738	0.867792	1.1139	0.779056	0.435946	0.999959	L4/5 IT Glut4	up
Lsm4	2.28873	0.867302	1.08883	0.796548	0.425714	0.999959	L4/5 IT Glut4	up
Aspn	0.655812	0.864628	2.25757	0.38299	0.701727	0.999959	L4/5 IT Glut4	up
Svep1	0.370233	0.864446	2.8852	0.299614	0.764472	0.999959	L4/5 IT Glut4	up
St6galnac4	4.43338	0.864367	0.757158	1.14159	0.253623	0.999959	L4/5 IT Glut4	up
Fbxo47	2.65298	0.864011	0.991492	0.871425	0.383522	0.999959	L4/5 IT Glut4	up
1700001L19Rik	2.89078	0.862907	0.941531	0.916494	0.359408	0.999959	L4/5 IT Glut4	up
S100a1	0.295909	0.861962	3.13172	0.275236	0.783135	0.999959	L4/5 IT Glut4	up
Pard3b	0.904418	0.861431	1.64019	0.525203	0.599442	0.999959	L4/5 IT Glut4	up
Slc6a9	6.47138	0.86037	0.622156	1.38289	0.1667	0.999959	L4/5 IT Glut4	up
Cd109	0.467296	0.858421	2.64255	0.324845	0.745298	0.999959	L4/5 IT Glut4	up
Rpa2	0.955943	0.857426	1.76874	0.484768	0.627841	0.999959	L4/5 IT Glut4	up
Smpdl3b	0.314491	0.857308	3.06815	0.279422	0.779921	0.999959	L4/5 IT Glut4	up
Rcl1	6.01618	0.857068	0.647842	1.32296	0.18585	0.999959	L4/5 IT Glut4	up
Rdh11	4.74803	0.856985	0.744765	1.15068	0.249864	0.999959	L4/5 IT Glut4	up
Zscan25	4.1669	0.856725	0.792219	1.08142	0.279508	0.999959	L4/5 IT Glut4	up
Tram2	0.911677	0.854704	1.6967	0.503745	0.614441	0.999959	L4/5 IT Glut4	up
Avpi1	1.3298	0.854621	1.39315	0.613446	0.539582	0.999959	L4/5 IT Glut4	up
Fuom	3.82691	0.853613	0.836715	1.0202	0.307636	0.999959	L4/5 IT Glut4	up
Prtn3	1.3425	0.851435	1.44991	0.587235	0.557046	0.999959	L4/5 IT Glut4	up
Fndc1	0.497611	0.851136	2.36918	0.359254	0.719405	0.999959	L4/5 IT Glut4	up
Nuak2	0.433528	0.850983	2.48946	0.341834	0.732475	0.999959	L4/5 IT Glut4	up
Serpinb8	12.5674	0.850459	0.452571	1.87917	0.0602213	0.999959	L4/5 IT Glut4	up
Eif4ebp1	2.25757	0.850208	1.0879	0.781516	0.434499	0.999959	L4/5 IT Glut4	up
Bnc2	0.880377	0.84836	3.10934	0.272843	0.784974	0.999959	L4/5 IT Glut4	up
Casp12	0.476774	0.848109	2.60729	0.325283	0.744967	0.999959	L4/5 IT Glut4	up
Mrps12	5.28234	0.846908	0.747693	1.13269	0.257342	0.999959	L4/5 IT Glut4	up
Tram1l1	1.88517	0.84667	1.17927	0.717963	0.47278	0.999959	L4/5 IT Glut4	up
Rpl18a	3.67759	0.846022	1.09493	0.772673	0.439716	0.999959	L4/5 IT Glut4	up
Tchh	0.948441	0.845404	1.6447	0.514017	0.60724	0.999959	L4/5 IT Glut4	up
Vstm2b	6.68509	0.845035	0.614825	1.37443	0.169308	0.999959	L4/5 IT Glut4	up
Mrps10	11.1438	0.844805	0.504497	1.67455	0.0940226	0.999959	L4/5 IT Glut4	up
Kif22	3.95946	0.843655	0.849622	0.992977	0.320721	0.999959	L4/5 IT Glut4	up
Lsm14b	5.72348	0.843215	0.667366	1.2635	0.20641	0.999959	L4/5 IT Glut4	up
Zfp85	1.55511	0.843035	1.36795	0.616276	0.53771229681866906	0.999959	L4/5 IT Glut4	up
Nrsn2	0.506221	0.842524	2.36689	0.355962	0.721869	0.999959	L4/5 IT Glut4	up
Nle1	5.54759	0.842463	0.699435	1.20449	0.228401	0.999959	L4/5 IT Glut4	up
Lrrc75b	2.22835	0.841645	1.10148	0.764104	0.444805	0.999959	L4/5 IT Glut4	up
Tpx2	1.03538	0.841068	1.52339	0.552102	0.580878	0.999959	L4/5 IT Glut4	up
Zfp366	0.458168	0.840933	2.4505	0.343168	0.731472	0.999959	L4/5 IT Glut4	up
Amigo2	0.425227	0.840526	2.71821	0.309221	0.757154	0.999959	L4/5 IT Glut4	up
Col9a3	0.586282	0.839919	1.9781	0.42461	0.671121	0.999959	L4/5 IT Glut4	up
Gstk1	0.339131	0.839423	2.98395	0.281313	0.77847	0.999959	L4/5 IT Glut4	up
Pnma1	0.339131	0.839423	2.98395	0.281313	0.77847	0.999959	L4/5 IT Glut4	up
Mthfs	19.1849	0.83884	0.379303	2.21153	0.0269991	0.999959	L4/5 IT Glut4	up
Myh2	0.431114	0.838479	2.69444	0.311188	0.755657	0.999959	L4/5 IT Glut4	up
Mrpl30	3.1987	0.838131	0.907131	0.923935	0.35552	0.999959	L4/5 IT Glut4	up
Psmb6	2.2974	0.837594	1.14	0.734731	0.462503	0.999959	L4/5 IT Glut4	up
Slc6a1	2.30206	0.836332	1.12931	0.74057	0.458954	0.999959	L4/5 IT Glut4	up
Kctd21	3.81024	0.835964	0.840898	0.994132	0.320158	0.999959	L4/5 IT Glut4	up
Vcpkmt	2.22536	0.835552	1.07529	0.777046	0.437132	0.999959	L4/5 IT Glut4	up
Ssc4d	0.748022	0.835304	2.06716	0.404083	0.686152	0.999959	L4/5 IT Glut4	up
Syt12	7.9808	0.833867	0.612162	1.36217	0.173145	0.999959	L4/5 IT Glut4	up
Slc6a16	0.700477	0.83366	2.08352	0.400121	0.689067	0.999959	L4/5 IT Glut4	up
Tbc1d4	2.89457	0.832235	1.04515	0.796284	0.425867	0.999959	L4/5 IT Glut4	up
Galm	0.79128	0.832224	1.79548	0.463512	0.642998	0.999959	L4/5 IT Glut4	up
Cygb	3.72045	0.83219	0.839022	0.991857	0.321267	0.999959	L4/5 IT Glut4	up
Gm20878	0.707799	0.831542	1.95867	0.424544	0.671169	0.999959	L4/5 IT Glut4	up
Cops6	4.26177	0.829766	0.795405	1.0432	0.296856	0.999959	L4/5 IT Glut4	up
Gzf1	6.45913	0.828288	0.618977	1.33816	0.180845	0.999959	L4/5 IT Glut4	up
Il17rd	2.0028	0.82813	1.17555	0.70446	0.481146	0.999959	L4/5 IT Glut4	up
Qsox2	8.71145	0.827714	0.523837	1.5801	0.114084	0.999959	L4/5 IT Glut4	up
Coa6	2.17823	0.826713	1.04029	0.794692	0.426793	0.999959	L4/5 IT Glut4	up
Riox2	5.28374	0.82499	0.68306	1.20778	0.22713	0.999959	L4/5 IT Glut4	up
AA467197	0.197272	0.824345	3.14501	0.262112	0.793235	0.999959	L4/5 IT Glut4	up
D630003M21Rik	0.197272	0.824345	3.14501	0.262112	0.793235	0.999959	L4/5 IT Glut4	up
Paqr6	0.197272	0.824345	3.14501	0.262112	0.793235	0.999959	L4/5 IT Glut4	up
Car14	0.197272	0.824345	3.14501	0.262112	0.793235	0.999959	L4/5 IT Glut4	up
Ccl21a	0.197272	0.824345	3.14501	0.262112	0.793235	0.999959	L4/5 IT Glut4	up
Tekt2	0.197272	0.824345	3.14501	0.262112	0.793235	0.999959	L4/5 IT Glut4	up
Id3	0.197272	0.824345	3.14501	0.262112	0.793235	0.999959	L4/5 IT Glut4	up
Mpzl2	0.197272	0.824345	3.14501	0.262112	0.793235	0.999959	L4/5 IT Glut4	up
Tbx18	0.197272	0.824345	3.14501	0.262112	0.793235	0.999959	L4/5 IT Glut4	up
Chst3	0.197272	0.824345	3.14501	0.262112	0.793235	0.999959	L4/5 IT Glut4	up
Theg	0.197272	0.824345	3.14501	0.262112	0.793235	0.999959	L4/5 IT Glut4	up
Gm49322	0.197272	0.824345	3.14501	0.262112	0.793235	0.999959	L4/5 IT Glut4	up
Alox8	0.197272	0.824345	3.14501	0.262112	0.793235	0.999959	L4/5 IT Glut4	up
Abcb5	0.197272	0.824345	3.14501	0.262112	0.793235	0.999959	L4/5 IT Glut4	up
Sall3	0.197272	0.824345	3.14501	0.262112	0.793235	0.999959	L4/5 IT Glut4	up
Cyp26c1	0.197272	0.824345	3.14501	0.262112	0.793235	0.999959	L4/5 IT Glut4	up
Usp26	0.197272	0.824345	3.14501	0.262112	0.793235	0.999959	L4/5 IT Glut4	up
Pla2g4a	1.38923	0.823397	1.39011	0.592324	0.553634	0.999959	L4/5 IT Glut4	up
Pecr	4.87585	0.823188	0.699709	1.17647	0.239406	0.999959	L4/5 IT Glut4	up
Lrrc61	1.68067	0.82308	1.2258	0.671465	0.501924	0.999959	L4/5 IT Glut4	up
Hoga1	3.3487	0.822733	0.844998	0.973651	0.33023	0.999959	L4/5 IT Glut4	up
Mab21l2	0.257923	0.822593	3.14582	0.261487	0.793717	0.999959	L4/5 IT Glut4	up
Megf6	0.257923	0.822593	3.14582	0.261487	0.793717	0.999959	L4/5 IT Glut4	up
Pde3a	0.257923	0.822593	3.14582	0.261487	0.793717	0.999959	L4/5 IT Glut4	up
Il10ra	0.257923	0.822593	3.14582	0.261487	0.793717	0.999959	L4/5 IT Glut4	up
Sytl5	0.257923	0.822593	3.14582	0.261487	0.793717	0.999959	L4/5 IT Glut4	up
Adamts5	2.38596	0.821743	1.08861	0.754856	0.450336	0.999959	L4/5 IT Glut4	up
Esrrb	0.486865	0.821183	2.22133	0.369681	0.71162	0.999959	L4/5 IT Glut4	up
Ddx4	2.49855	0.821036	0.995075	0.825099	0.409315	0.999959	L4/5 IT Glut4	up
Trim62	2.12892	0.821002	1.07984	0.760297	0.447077	0.999959	L4/5 IT Glut4	up
Mettl23	3.1438	0.820768	1.01134	0.811568	0.41704	0.999959	L4/5 IT Glut4	up
Mcub	0.405657	0.820234	2.78156	0.294883	0.768083	0.999959	L4/5 IT Glut4	up
Zim1	0.405657	0.820234	2.78156	0.294883	0.768083	0.999959	L4/5 IT Glut4	up
Rps27rt	0.590933	0.819875	2.35283	0.348464	0.727492	0.999959	L4/5 IT Glut4	up
Havcr2	0.302949	0.819068	3.094	0.264728	0.791219	0.999959	L4/5 IT Glut4	up
Rflna	0.493367	0.818625	2.25838	0.362483	0.716991	0.999959	L4/5 IT Glut4	up
Zkscan8	3.93207	0.81829	0.787189	1.03951	0.298568	0.999959	L4/5 IT Glut4	up
Tmem129	1.96031	0.816919	1.16151	0.703322	0.481855	0.999959	L4/5 IT Glut4	up
Nhp2	1.35589	0.816895	1.45944	0.559732	0.575663	0.999959	L4/5 IT Glut4	up
Snrpe	5.52566	0.81662	0.706233	1.1563	0.247557	0.999959	L4/5 IT Glut4	up
Fcgrt	0.391279	0.816104	3.12076	0.261508	0.793701	0.999959	L4/5 IT Glut4	up
Parm1	4.57674	0.815808	0.811794	1.00494	0.314924	0.999959	L4/5 IT Glut4	up
4933430I17Rik	0.784755	0.815707	1.73502	0.470142	0.638254	0.999959	L4/5 IT Glut4	up
Ptgds	8.11885	0.815451	0.750832	1.08606	0.277451	0.999959	L4/5 IT Glut4	up
Ntn3	5.08027	0.81419	0.706808	1.15192	0.249352	0.999959	L4/5 IT Glut4	up
Insm1	0.595352	0.813799	2.12036	0.383802	0.701125	0.999959	L4/5 IT Glut4	up
Hist3h2ba	1.20631	0.813656	1.57442	0.516797	0.605298	0.999959	L4/5 IT Glut4	up
Pcdhac2	0.394286	0.813534	2.78989	0.291601	0.770592	0.999959	L4/5 IT Glut4	up
Klf3	3.62694	0.813201	0.816257	0.996255	0.319126	0.999959	L4/5 IT Glut4	up
Rfx1	12.6159	0.812959	0.439704	1.84888	0.0644755	0.999959	L4/5 IT Glut4	up
Leng9	3.84448	0.812821	0.897888	0.905258	0.365329	0.999959	L4/5 IT Glut4	up
Tacc3	1.40239	0.812437	1.32843	0.611576	0.540818	0.999959	L4/5 IT Glut4	up
Psmc3ip	0.381189	0.81228	2.83422	0.286597	0.774421	0.999959	L4/5 IT Glut4	up
Pdia2	0.363994	0.811576	2.8916	0.280667	0.778966	0.999959	L4/5 IT Glut4	up
Scnn1a	0.424645	0.811248	2.72003	0.298249	0.765513	0.999959	L4/5 IT Glut4	up
Npbwr1	0.129758	0.811071	3.14526	0.257871	0.796506	0.999959	L4/5 IT Glut4	up
Ikbke	0.129758	0.811071	3.14526	0.257871	0.796506	0.999959	L4/5 IT Glut4	up
Ttll9	0.129758	0.811071	3.14526	0.257871	0.796506	0.999959	L4/5 IT Glut4	up
Fmo5	0.129758	0.811071	3.14526	0.257871	0.796506	0.999959	L4/5 IT Glut4	up
Fkbp6	0.129758	0.811071	3.14526	0.257871	0.796506	0.999959	L4/5 IT Glut4	up
Samd9l	0.129758	0.811071	3.14526	0.257871	0.796506	0.999959	L4/5 IT Glut4	up
Plbd1	0.129758	0.811071	3.14526	0.257871	0.796506	0.999959	L4/5 IT Glut4	up
Foxa3	0.129758	0.811071	3.14526	0.257871	0.796506	0.999959	L4/5 IT Glut4	up
Klkb1	0.129758	0.811071	3.14526	0.257871	0.796506	0.999959	L4/5 IT Glut4	up
Tmem45b	0.129758	0.811071	3.14526	0.257871	0.796506	0.999959	L4/5 IT Glut4	up
Pif1	0.129758	0.811071	3.14526	0.257871	0.796506	0.999959	L4/5 IT Glut4	up
Col6a6	0.129758	0.811071	3.14526	0.257871	0.796506	0.999959	L4/5 IT Glut4	up
Npffr1	0.129758	0.811071	3.14526	0.257871	0.796506	0.999959	L4/5 IT Glut4	up
Jsrp1	0.129758	0.811071	3.14526	0.257871	0.796506	0.999959	L4/5 IT Glut4	up
Pomc	0.129758	0.811071	3.14526	0.257871	0.796506	0.999959	L4/5 IT Glut4	up
Klhl38	0.129758	0.811071	3.14526	0.257871	0.796506	0.999959	L4/5 IT Glut4	up
Prm1	0.129758	0.811071	3.14526	0.257871	0.796506	0.999959	L4/5 IT Glut4	up
Rasal3	0.129758	0.811071	3.14526	0.257871	0.796506	0.999959	L4/5 IT Glut4	up
Gm10549	0.129758	0.811071	3.14526	0.257871	0.796506	0.999959	L4/5 IT Glut4	up
Olfr1425	0.129758	0.811071	3.14526	0.257871	0.796506	0.999959	L4/5 IT Glut4	up
Mex3d	1.49471	0.809762	1.34886	0.600332	0.548285	0.999959	L4/5 IT Glut4	up
Pdzk1	2.09455	0.809354	1.1356	0.71271	0.476025	0.999959	L4/5 IT Glut4	up
Knstrn	1.19545	0.809086	1.42131	0.569254	0.569183	0.999959	L4/5 IT Glut4	up
Lsm5	3.00676	0.806763	0.960516	0.839927	0.400949	0.999959	L4/5 IT Glut4	up
Bmp8b	1.07861	0.806105	1.5735	0.5123	0.608441	0.999959	L4/5 IT Glut4	up
Lamtor1	7.5705	0.805995	0.604783	1.3327	0.18263	0.999959	L4/5 IT Glut4	up
AB124611	0.985004	0.804216	1.60496	0.501082	0.616313	0.999959	L4/5 IT Glut4	up
Clec11a	0.841144	0.804211	1.85079	0.434522	0.663909	0.999959	L4/5 IT Glut4	up
Gm14419	0.707609	0.803881	1.96837	0.4084	0.68298	0.999959	L4/5 IT Glut4	up
Adam19	18.2104	0.803004	0.456862	1.75765	0.0788071	0.999959	L4/5 IT Glut4	up
Klhl33	7.32202	0.802885	0.593929	1.35182	0.176433	0.999959	L4/5 IT Glut4	up
Zfp41	0.910009	0.80087	1.88585	0.424674	0.671074	0.999959	L4/5 IT Glut4	up
Cybc1	2.73614	0.800597	1.02959	0.777588	0.436812	0.999959	L4/5 IT Glut4	up
Spata17	0.942427	0.800336	1.68988	0.473605	0.635782	0.999959	L4/5 IT Glut4	up
Nrp1	21.0162	0.800211	0.360138	2.2219596873369998	0.026286	0.999959	L4/5 IT Glut4	up
Coa5	3.39987	0.800106	0.879767	0.909452	0.363112	0.999959	L4/5 IT Glut4	up
Tmem159	4.23032	0.800038	0.767931	1.04181	0.2975	0.999959	L4/5 IT Glut4	up
Ap1g2	1.89769	0.800028	1.13861	0.702633	0.482285	0.999959	L4/5 IT Glut4	up
Neurog2	0.338109	0.799658	2.96565	0.26964	0.787437	0.999959	L4/5 IT Glut4	up
Akain1	0.338109	0.799658	2.96565	0.26964	0.787437	0.999959	L4/5 IT Glut4	up
Alg3	1.82169	0.798719	1.27161	0.628116	0.529928	0.999959	L4/5 IT Glut4	up
Insc	0.293459	0.798607	3.12715	0.255378	0.798431	0.999959	L4/5 IT Glut4	up
Pde6g	0.545262	0.797804	2.13458	0.373751	0.708589	0.999959	L4/5 IT Glut4	up
Grcc10	3.85731	0.797797	0.857646	0.930216	0.35225907021930303	0.999959	L4/5 IT Glut4	up
Crb2	0.798141	0.796781	1.90062	0.419222	0.675054	0.999959	L4/5 IT Glut4	up
Zcchc10	4.44397	0.796775	0.765073	1.04144	0.297673	0.999959	L4/5 IT Glut4	up
Raver2	4.07485	0.796493	0.810941	0.982184	0.326009	0.999959	L4/5 IT Glut4	up
Apip	6.74682	0.796036	0.636855	1.24995	0.211319	0.999959	L4/5 IT Glut4	up
Ubash3b	7.04401	0.795115	0.624088	1.27404	0.202648	0.999959	L4/5 IT Glut4	up
Fstl3	1.59534	0.794818	1.22323	0.649771	0.51584	0.999959	L4/5 IT Glut4	up
C1galt1c1	3.12064	0.794759	0.929024	0.855477	0.392287	0.999959	L4/5 IT Glut4	up
Wdfy4	0.497591	0.794652	2.5227	0.315001	0.752761	0.999959	L4/5 IT Glut4	up
Cbfa2t3	11.8478	0.794595	0.464223	1.71167	0.0869582	0.999959	L4/5 IT Glut4	up
Umps	2.49633	0.794487	1.01432	0.783271	0.433468	0.999959	L4/5 IT Glut4	up
Psenen	5.33821	0.794255	0.757605	1.04838	0.294465	0.999959	L4/5 IT Glut4	up
Hsd17b10	1.04021	0.793882	1.75326	0.452802	0.650691	0.999959	L4/5 IT Glut4	up
Rdh14	5.24832	0.79354	0.736113	1.07801	0.281028	0.999959	L4/5 IT Glut4	up
Prom1	0.404807	0.793278	2.76035	0.287383	0.773819	0.999959	L4/5 IT Glut4	up
Mafk	0.278309	0.791937	3.13646	0.252494	0.800659	0.999959	L4/5 IT Glut4	up
Ttll13	0.502611	0.791753	2.19936	0.359992	0.718853	0.999959	L4/5 IT Glut4	up
Ptger1	0.502611	0.791753	2.19936	0.359992	0.718853	0.999959	L4/5 IT Glut4	up
Triobp	2.44284	0.791462	1.05735	0.748534	0.454138	0.999959	L4/5 IT Glut4	up
Vhl	5.28758	0.79076	0.674103	1.17305	0.240774	0.999959	L4/5 IT Glut4	up
1810037I17Rik	7.40574	0.790422	0.619821	1.27524	0.202223	0.999959	L4/5 IT Glut4	up
Art3	0.372717	0.789492	2.86939	0.275143	0.783206	0.999959	L4/5 IT Glut4	up
Arl5c	0.372717	0.789492	2.86939	0.275143	0.783206	0.999959	L4/5 IT Glut4	up
Fam177a	0.372717	0.789492	2.86939	0.275143	0.783206	0.999959	L4/5 IT Glut4	up
Slc7a2	0.511728	0.788877	2.22312	0.354851	0.722701	0.999959	L4/5 IT Glut4	up
4930590J08Rik	4.65813	0.788201	0.747336	1.05468	0.291571	0.999959	L4/5 IT Glut4	up
Zbtb14	4.02629	0.787828	0.793678	0.99263	0.32089	0.999959	L4/5 IT Glut4	up
Opalin	0.380372	0.787408	2.82598	0.278632	0.780528	0.999959	L4/5 IT Glut4	up
Tmem17	2.63722	0.786523	0.968518	0.812089	0.41674	0.999959	L4/5 IT Glut4	up
Cptp	0.69801	0.78639	1.89142	0.415767	0.677581	0.999959	L4/5 IT Glut4	up
Kif15	1.55978	0.785273	1.38596	0.566593	0.570991	0.999959	L4/5 IT Glut4	up
Arfip1	0.879778	0.78503	1.66024	0.472841	0.636327	0.999959	L4/5 IT Glut4	up
Hebp1	6.04541	0.784923	0.658931	1.19121	0.233573	0.999959	L4/5 IT Glut4	up
Ednra	0.532182	0.784212	2.48569	0.315491	0.752389	0.999959	L4/5 IT Glut4	up
Pgbd1	3.21325	0.783613	0.880854	0.889607	0.373677	0.999959	L4/5 IT Glut4	up
Ccdc77	8.01599	0.783365	0.560669	1.3972	0.162354	0.999959	L4/5 IT Glut4	up
Fyb	0.430913	0.783173	2.71642	0.288311	0.773109	0.999959	L4/5 IT Glut4	up
Lmo1	1.13112	0.783047	1.50091	0.521716	0.601868	0.999959	L4/5 IT Glut4	up
Fkbp14	1.90418	0.782108	1.25072	0.625327	0.531756	0.999959	L4/5 IT Glut4	up
Slc22a1	0.308634	0.782041	3.08671	0.253358	0.799992	0.999959	L4/5 IT Glut4	up
Mrps36	6.15153	0.782039	0.635615	1.23036	0.218561	0.999959	L4/5 IT Glut4	up
C1qc	0.32942	0.781114	2.99514	0.260794	0.794252	0.999959	L4/5 IT Glut4	up
Acad9	5.7956	0.780631	0.647158	1.20624	0.227723	0.999959	L4/5 IT Glut4	up
Car15	0.312066	0.780378	3.07931	0.253426	0.799939	0.999959	L4/5 IT Glut4	up
Lats2	0.530715	0.778467	2.47536	0.314487	0.753151	0.999959	L4/5 IT Glut4	up
Lat	0.720114	0.777928	2.0653	0.376667	0.706421	0.999959	L4/5 IT Glut4	up
Lipt1	0.790975	0.777255	2.18273	0.356093	0.721771	0.999959	L4/5 IT Glut4	up
Fam122a	3.40295	0.776201	0.866002	0.896304	0.37009	0.999959	L4/5 IT Glut4	up
Atp6v0a4	4.1540956475679804	0.774755	0.777112	0.996967	0.31878	0.999959	L4/5 IT Glut4	up
Map3k21	2.86719	0.774353	0.956865	0.809261	0.418365	0.999959	L4/5 IT Glut4	up
Znrd1	3.60369	0.773753	0.838892	0.922351	0.356346	0.999959	L4/5 IT Glut4	up
Lrrc32	0.408253	0.772842	2.76843	0.279163	0.78012	0.999959	L4/5 IT Glut4	up
Wdr92	5.59343	0.772043	0.664425	1.16197	0.245247	0.999959	L4/5 IT Glut4	up
A430005L14Rik	3.74859	0.770915	0.793841	0.97112	0.331488	0.999959	L4/5 IT Glut4	up
Ccdc78	1.82738	0.770637	1.26239	0.610461	0.541556	0.999959	L4/5 IT Glut4	up
Ptpn22	1.05698	0.770526	1.62801	0.473293	0.636004	0.999959	L4/5 IT Glut4	up
Cstl1	0.532999	0.770363	2.48165	0.310423	0.756239	0.999959	L4/5 IT Glut4	up
Uqcrq	5.84359	0.770247	0.745026	1.03385	0.301205	0.999959	L4/5 IT Glut4	up
Selplg	0.435949	0.768432	2.67781	0.286962	0.774141	0.999959	L4/5 IT Glut4	up
Ift22	6.61426	0.767237	0.618082	1.24132	0.214488	0.999959	L4/5 IT Glut4	up
Exo1	0.545295	0.767216	2.16064	0.355087	0.722524	0.999959	L4/5 IT Glut4	up
Dock1	9.19379	0.767043	0.547295	1.40152	0.161059	0.999959	L4/5 IT Glut4	up
Selenov	0.195639	0.766948	3.13907	0.244323	0.80698	0.999959	L4/5 IT Glut4	up
Tlr3	0.195639	0.766948	3.13907	0.244323	0.80698	0.999959	L4/5 IT Glut4	up
Fxyd2	0.195639	0.766948	3.13907	0.244323	0.80698	0.999959	L4/5 IT Glut4	up
Gfral	0.195639	0.766948	3.13907	0.244323	0.80698	0.999959	L4/5 IT Glut4	up
Myl3	0.195639	0.766948	3.13907	0.244323	0.80698	0.999959	L4/5 IT Glut4	up
Ebf1	0.195639	0.766948	3.13907	0.244323	0.80698	0.999959	L4/5 IT Glut4	up
Catsperb	0.195639	0.766948	3.13907	0.244323	0.80698	0.999959	L4/5 IT Glut4	up
Gnrh1	0.195639	0.766948	3.13907	0.244323	0.80698	0.999959	L4/5 IT Glut4	up
Nudt22	0.195639	0.766948	3.13907	0.244323	0.80698	0.999959	L4/5 IT Glut4	up
Cysltr1	0.195639	0.766948	3.13907	0.244323	0.80698	0.999959	L4/5 IT Glut4	up
Gins3	1.04611	0.766409	1.61357	0.474976	0.634804	0.999959	L4/5 IT Glut4	up
Cd4	0.298298	0.765868	3.13562	0.244247	0.807039	0.999959	L4/5 IT Glut4	up
Ddit4	0.298298	0.765868	3.13562	0.244247	0.807039	0.999959	L4/5 IT Glut4	up
Hist3h2a	1.22577	0.765803	3.05962	0.250293	0.802361	0.999959	L4/5 IT Glut4	up
Zfp763	6.58811	0.765305	0.64267	1.19082	0.233724	0.999959	L4/5 IT Glut4	up
Tor2a	4.18878	0.765231	0.800906	0.955458	0.339346	0.999959	L4/5 IT Glut4	up
Mtif3	6.17355	0.76509	0.658167	1.16246	0.24505	0.999959	L4/5 IT Glut4	up
Allc	0.5196	0.76459	2.19308	0.348637	0.727362	0.999959	L4/5 IT Glut4	up
Fhdc1	0.744719	0.764176	1.74215	0.438639	0.660923	0.999959	L4/5 IT Glut4	up
Elac1	11.5633	0.763174	0.470056	1.62358	0.104465	0.999959	L4/5 IT Glut4	up
1700029J07Rik	7.21367	0.762401	0.616322	1.23702	0.216081	0.999959	L4/5 IT Glut4	up
Ormdl3	5.26425	0.762263	0.726087	1.04982	0.293799	0.999959	L4/5 IT Glut4	up
Gpr149	0.405012	0.762232	2.76158	0.276013	0.782538	0.999959	L4/5 IT Glut4	up
Ankdd1a	1.54439	0.761619	1.34833	0.564861	0.572168	0.999959	L4/5 IT Glut4	up
Spp1	0.492742	0.761443	2.5997	0.292897	0.769601	0.999959	L4/5 IT Glut4	up
Tspan33	12.7499	0.761063	0.471203	1.61515	0.106278	0.999959	L4/5 IT Glut4	up
Kcng3	16.9235	0.760356	0.395268	1.92365	0.0543988	0.999959	L4/5 IT Glut4	up
Rprm	1.54762	0.758419	1.43608	0.528119	0.597417	0.999959	L4/5 IT Glut4	up
Scamp2	10.3003	0.75763	0.526132	1.44	0.149867	0.999959	L4/5 IT Glut4	up
Angptl6	1.53924	0.75702	1.23223	0.614352	0.538983	0.999959	L4/5 IT Glut4	up
Hist1h2ae	0.362361	0.756963	2.89668	0.261321	0.793845	0.999959	L4/5 IT Glut4	up
Cpa2	0.571528	0.756911	2.11046	0.358647	0.71986	0.999959	L4/5 IT Glut4	up
Thap7	2.29525	0.75678	1.04853	0.721756	0.470445	0.999959	L4/5 IT Glut4	up
Palld	0.40399	0.756578	2.7718	0.272956	0.784887	0.999959	L4/5 IT Glut4	up
Mrps34	1.11597	0.755707	1.65262	0.457277	0.647472	0.999959	L4/5 IT Glut4	up
Zfp709	1.30319	0.755457	1.45843	0.517994	0.604462	0.999959	L4/5 IT Glut4	up
Tsc2	10.6121	0.755231	0.488666	1.5455	0.122226	0.999959	L4/5 IT Glut4	up
Tsr1	5.20472	0.755032	0.678533	1.11274	0.265819	0.999959	L4/5 IT Glut4	up
Praf2	1.55696	0.75482	1.26804	0.595266	0.551666	0.999959	L4/5 IT Glut4	up
Trim7	3.70456	0.752976	0.806393	0.933757	0.350429	0.999959	L4/5 IT Glut4	up
Slc25a43	1.25836	0.752381	1.55496	0.483857	0.628487	0.999959	L4/5 IT Glut4	up
Gdf9	0.34419	0.751758	2.96474	0.253566	0.799831	0.999959	L4/5 IT Glut4	up
Gemin7	3.44184	0.751731	0.905631	0.830063	0.406503	0.999959	L4/5 IT Glut4	up
Maz	12.125	0.751573	0.446516	1.68319	0.0923375	0.999959	L4/5 IT Glut4	up
Eya1	1.35278	0.749545	2.48833	0.301225	0.763243	0.999959	L4/5 IT Glut4	up
Gpr173	7.81258	0.749217	0.564472	1.32729	0.184413	0.999959	L4/5 IT Glut4	up
Strip2	4.03282	0.749039	0.772412	0.96974	0.332176	0.999959	L4/5 IT Glut4	up
B4galnt3	10.4392	0.748003	0.533952	1.40088	0.16125	0.999959	L4/5 IT Glut4	up
Adgb	2.54107	0.747632	1.16775	0.640234	0.522021	0.999959	L4/5 IT Glut4	up
Cd164	3.3599	0.747396	0.938536	0.796342	0.425833	0.999959	L4/5 IT Glut4	up
Atoh7	1.94818	0.747054	1.21426	0.615232	0.538402	0.999959	L4/5 IT Glut4	up
Mapk12	2.08426	0.746983	1.08482	0.688575	0.491091	0.999959	L4/5 IT Glut4	up
Sephs2	0.76775853356883506	0.745824	1.91169	0.390139	0.696434	0.999959	L4/5 IT Glut4	up
Rrp9	5.33284	0.745571	0.684526	1.08918	0.276075	0.999959	L4/5 IT Glut4	up
Exo5	2.1564	0.745233	1.09005	0.683668	0.494185	0.999959	L4/5 IT Glut4	up
Blcap	7.38073	0.743835	0.606026	1.2274	0.219673	0.999959	L4/5 IT Glut4	up
Fbxl14	2.54149	0.743796	1.00832	0.737661	0.46072	0.999959	L4/5 IT Glut4	up
Parvb	1.94919	0.743564	1.17018	0.635427	0.52515	0.999959	L4/5 IT Glut4	up
Ctdsp1	0.844808	0.74271	1.83948	0.403762	0.686388	0.999959	L4/5 IT Glut4	up
Sema5b	1.4907	0.742546	1.41869	0.523401	0.600695	0.999959	L4/5 IT Glut4	up
Cd101	1.35732	0.742522	1.53965	0.482267	0.629616	0.999959	L4/5 IT Glut4	up
Fblim1	0.436535	0.742071	2.47694	0.299592	0.764488	0.999959	L4/5 IT Glut4	up
Nprl2	4.91907	0.74183	0.723197	1.02577	0.305002	0.999959	L4/5 IT Glut4	up
Otub2	2.60758	0.741718	1.01232	0.732689	0.463748	0.999959	L4/5 IT Glut4	up
Mycn	0.936667	0.741074	1.78735	0.414622	0.678418	0.999959	L4/5 IT Glut4	up
Tatdn2	3.51859	0.740856	0.867268	0.85424	0.392972	0.999959	L4/5 IT Glut4	up
Bach1	1.74132	0.740279	1.34784	0.549232	0.582846	0.999959	L4/5 IT Glut4	up
Mtrr	1.50604	0.738543	1.30314	0.566741	0.57089	0.999959	L4/5 IT Glut4	up
Hgh1	2.11245	0.737856	1.12869	0.653725	0.513289	0.999959	L4/5 IT Glut4	up
B4galt7	4.18455	0.737327	0.789707	0.933672	0.350473	0.999959	L4/5 IT Glut4	up
Rab42	1.21904	0.73678613118135206	1.49157	0.493966	0.62133	0.999959	L4/5 IT Glut4	up
Uqcr11	3.85032	0.736587	1.07339	0.686226	0.492571	0.999959	L4/5 IT Glut4	up
Rpl28	3.88665	0.736357	1.10235	0.667986	0.504143	0.999959	L4/5 IT Glut4	up
Ufm1	3.21763	0.73617	0.951488	0.773705	0.439105	0.999959	L4/5 IT Glut4	up
Zfp870	0.726148	0.735963	1.9702	0.373548	0.708741	0.999959	L4/5 IT Glut4	up
Rab5if	9.69923	0.735904	0.539042	1.36521	0.172187	0.999959	L4/5 IT Glut4	up
Lrrc2	1.36862	0.73506	1.35349	0.543085	0.587071	0.999959	L4/5 IT Glut4	up
Tpm4	4.55303	0.733677	0.757662	0.968343	0.332873	0.999959	L4/5 IT Glut4	up
Igflr1	3.14058	0.733434	0.894629	0.81982	0.412319	0.999959	L4/5 IT Glut4	up
Cacna2d4	1.10446	0.732953	1.4591	0.502332	0.615434	0.999959	L4/5 IT Glut4	up
Cwf19l1	7.58323	0.732324	0.58029	1.262	0.20694993404130901	0.999959	L4/5 IT Glut4	up
Tgfb1i1	7.04484	0.732025	0.630503	1.16102	0.245634	0.999959	L4/5 IT Glut4	up
Ifitm10	3.23136	0.731482	0.896549	0.815887	0.414565	0.999959	L4/5 IT Glut4	up
Qdpr	3.27373	0.730628	0.899542	0.812223	0.416664	0.999959	L4/5 IT Glut4	up
Rexo5	0.675005	0.730092	1.99979	0.365084	0.715049	0.999959	L4/5 IT Glut4	up
Etfbkmt	1.00015	0.729931	1.61693	0.451428	0.651681	0.999959	L4/5 IT Glut4	up
Kmt2b	18.923	0.729846	0.385416	1.89366	0.0582707	0.999959	L4/5 IT Glut4	up
Lrrc34	0.46686	0.729539	2.41463	0.302133	0.762551	0.999959	L4/5 IT Glut4	up
Mtfr1	2.35513	0.729489	0.994763	0.733329	0.463358	0.999959	L4/5 IT Glut4	up
Lrrc47	4.5594	0.72906	0.776675	0.938693	0.347888	0.999959	L4/5 IT Glut4	up
Nol3	2.0183	0.728433	1.21056	0.60173	0.547354	0.999959	L4/5 IT Glut4	up
Adcy7	3.58184	0.72843	0.895775	0.813184	0.416113	0.999959	L4/5 IT Glut4	up
Pcx	11.7881	0.727848	0.46877	1.55268	0.1205	0.999959	L4/5 IT Glut4	up
Ormdl1	1.01295	0.727414	1.57253	0.462575	0.643669	0.999959	L4/5 IT Glut4	up
Olfr267	0.859962	0.72691	1.88599	0.385425	0.699922	0.999959	L4/5 IT Glut4	up
Sh2b2	5.90111	0.724993	0.673399	1.07662	0.281651	0.999959	L4/5 IT Glut4	up
Fam189a2	3.29858	0.724509	0.853245	0.849121	0.395814	0.999959	L4/5 IT Glut4	up
Plekhf2	1.97116	0.724397	1.1757	0.616141	0.537801	0.999959	L4/5 IT Glut4	up
Kif20a	1.18812	0.72415	1.50209	0.482097	0.629737	0.999959	L4/5 IT Glut4	up
Smim20	2.97464	0.723957	0.976682	0.741242	0.458547	0.999959	L4/5 IT Glut4	up
Proser2	1.47626	0.723773	1.49654	0.483631	0.628648	0.999959	L4/5 IT Glut4	up
Gnmt	1.51979	0.723074	1.23126	0.587265	0.557026	0.999959	L4/5 IT Glut4	up
Pes1	2.58005	0.722866	0.96271	0.750866	0.452734	0.999959	L4/5 IT Glut4	up
Exosc2	6.72887	0.722163	0.606909	1.1899	0.234085	0.999959	L4/5 IT Glut4	up
Zbtb7b	0.372895	0.721447	2.88495	0.250073	0.802531	0.999959	L4/5 IT Glut4	up
Tex43	0.372895	0.721447	2.88495	0.250073	0.802531	0.999959	L4/5 IT Glut4	up
Gm29797	0.322938	0.719211	3.058	0.23519	0.814061	0.999959	L4/5 IT Glut4	up
Gm11444	0.322938	0.719211	3.058	0.23519	0.814061	0.999959	L4/5 IT Glut4	up
Sec11c	8.85446	0.718229	0.549824	1.30629	0.191454	0.999959	L4/5 IT Glut4	up
Trim26	9.75112	0.717736	0.508671	1.411	0.158244	0.999959	L4/5 IT Glut4	up
Atp11c	39.4886	0.717685	0.27025	2.65564	0.00791588	0.999959	L4/5 IT Glut4	up
Imp3	2.46031	0.717436	1.024	0.700624	0.483538	0.999959	L4/5 IT Glut4	up
Plagl2	4.7778	0.716975	0.760509	0.942757	0.345805	0.999959	L4/5 IT Glut4	up
Cd320	5.60609	0.716502	0.649681	1.10285	0.270091	0.999959	L4/5 IT Glut4	up
Fpgs	2.9707	0.716238	0.907179	0.789523	0.429806	0.999959	L4/5 IT Glut4	up
Csf1	2.60691	0.714289	0.984429	0.725587	0.468092	0.999959	L4/5 IT Glut4	up
Sbsn	0.990102	0.714108	1.49313	0.478262	0.632464	0.999959	L4/5 IT Glut4	up
Tube1	1.38927	0.713998	1.28548	0.555435	0.578597	0.999959	L4/5 IT Glut4	up
Nox4	0.786943	0.71345	1.89389	0.37671167525238197	0.706388	0.999959	L4/5 IT Glut4	up
Tigd5	0.40014	0.712469	2.81217	0.253352	0.799996	0.999959	L4/5 IT Glut4	up
Akt2	19.6156	0.712462	0.366435	1.94431	0.0518583	0.999959	L4/5 IT Glut4	up
Ctu2	5.25247	0.711855	0.714449	0.99637	0.31907	0.999959	L4/5 IT Glut4	up
Slc2a2	1.83565	0.71157	1.24828	0.570041	0.56865	0.999959	L4/5 IT Glut4	up
Med28	3.43201	0.711458	0.872464	0.815458	0.41481	0.999959	L4/5 IT Glut4	up
Synpo2	0.615935	0.711334	2.20644	0.32239	0.747157	0.999959	L4/5 IT Glut4	up
Cdkn1a	6.4978	0.709435	0.662281	1.0712	0.28408	0.999959	L4/5 IT Glut4	up
Furin	8.66143	0.709183	0.544997	1.30126	0.193169	0.999959	L4/5 IT Glut4	up
Slc25a29	0.919312	0.708534	1.6021	0.442254	0.658306	0.999959	L4/5 IT Glut4	up
Pigh	2.91795	0.707555	0.965267	0.733015	0.463549	0.999959	L4/5 IT Glut4	up
Zfp874a	5.31706	0.70663	0.76118	0.928335	0.353234	0.999959	L4/5 IT Glut4	up
Pgap2	13.7672	0.706315	0.43845	1.61094	0.107193	0.999959	L4/5 IT Glut4	up
March10	10.0021	0.705712	0.495451	1.42438	0.154335	0.999959	L4/5 IT Glut4	up
Slc35b2	1.76957	0.705609	1.23741	0.570232	0.56852	0.999959	L4/5 IT Glut4	up
A2ml1	0.680877	0.704912	2.02083	0.348823	0.727222	0.999959	L4/5 IT Glut4	up
Higd1c	0.339138	0.704294	2.98999	0.235551	0.813781	0.999959	L4/5 IT Glut4	up
Ift27	1.80875	0.703586	1.32277	0.531903	0.594793	0.999959	L4/5 IT Glut4	up
Snorc	1.18656	0.702676	1.58577	0.443114	0.657683	0.999959	L4/5 IT Glut4	up
Ptrh2	8.11716	0.702488	0.56086	1.25252	0.21038	0.999959	L4/5 IT Glut4	up
Klhl10	9.92425	0.702092	0.524616	1.3383	0.1808	0.999959	L4/5 IT Glut4	up
Hmcn1	1.0267	0.699986	1.5885	0.440657	0.659461	0.999959	L4/5 IT Glut4	up
Sh2d4a	1.44605	0.699236	1.3978	0.500241	0.616905	0.999959	L4/5 IT Glut4	up
Klhl4	6.15546	0.698957	0.680315	1.0274	0.304231	0.999959	L4/5 IT Glut4	up
Tmed3	1.53509	0.698788	1.42846	0.489188	0.624708	0.999959	L4/5 IT Glut4	up
Itpa	14.7117	0.698564	0.421242	1.65834	0.0972483	0.999959	L4/5 IT Glut4	up
Atp5k	4.82631	0.698498	0.814776	0.857288	0.391286	0.999959	L4/5 IT Glut4	up
Wrap53	2.6811	0.698412	0.934727	0.747183	0.454953	0.999959	L4/5 IT Glut4	up
4930507D05Rik	0.323755	0.697229	3.05267	0.2284	0.819336	0.999959	L4/5 IT Glut4	up
Rab39	0.477174	0.695835	2.29898	0.302671	0.76214	0.999959	L4/5 IT Glut4	up
Tfip11	2.42121	0.695762	1.0952	0.635283	0.525244	0.999959	L4/5 IT Glut4	up
Stpg1	1.95554	0.694653	1.15584	0.600994	0.547844	0.999959	L4/5 IT Glut4	up
Carmil2	2.62284	0.694397	0.983683	0.705915	0.480241	0.999959	L4/5 IT Glut4	up
Mterf2	5.73079	0.692905	0.705346	0.982362	0.325921	0.999959	L4/5 IT Glut4	up
Get4	5.46539	0.6919	0.725523	0.953657	0.340257	0.999959	L4/5 IT Glut4	up
Ppp4c	5.89022	0.691379	0.637396	1.08469	0.278057	0.999959	L4/5 IT Glut4	up
Ankrd29	3.68108	0.689846	0.80095	0.861284	0.389081	0.999959	L4/5 IT Glut4	up
Gadd45g	2.55651	0.688839	1.02773	0.670252	0.502697	0.999959	L4/5 IT Glut4	up
Ctsk	2.24938	0.688562	1.03192	0.667261	0.504605	0.999959	L4/5 IT Glut4	up
Slc22a8	0.339955	0.686858	2.98505	0.2301	0.818014	0.999959	L4/5 IT Glut4	up
Arl10	1.18196	0.685021	1.63033	0.420172	0.67436	0.999959	L4/5 IT Glut4	up
Med21	7.35463	0.684564	0.641149	1.06772	0.285649	0.999959	L4/5 IT Glut4	up
Hsd11b1	1.73679	0.684548	1.31324	0.521267	0.602181	0.999959	L4/5 IT Glut4	up
Txndc17	3.92616	0.683734	0.887807	0.770138	0.441218	0.999959	L4/5 IT Glut4	up
Nudt1	1.32298	0.683584	1.40297	0.487242	0.626087	0.999959	L4/5 IT Glut4	up
Gpr1	4.77016	0.683394	0.76584	0.892345	0.372208	0.999959	L4/5 IT Glut4	up
Tpcn2	0.703346	0.682876	1.98775	0.343542	0.731191	0.999959	L4/5 IT Glut4	up
Oard1	1.98623	0.682691	1.1312	0.603512	0.546168	0.999959	L4/5 IT Glut4	up
Stab2	1.11597	0.681729	1.48113	0.460275	0.645319	0.999959	L4/5 IT Glut4	up
Rspo2	20.2141	0.680978	0.380046	1.79183	0.0731604	0.999959	L4/5 IT Glut4	up
Nsun7	1.83669	0.680591	1.12087	0.607198	0.543719	0.999959	L4/5 IT Glut4	up
Ehd1	4.11321	0.67878	0.810351	0.837637	0.402235	0.999959	L4/5 IT Glut4	up
Hist4h4	0.35408	0.677366	2.94655	0.229884	0.818182	0.999959	L4/5 IT Glut4	up
Pou5f2	4.18704	0.677149	0.761141	0.88965	0.373654	0.999959	L4/5 IT Glut4	up
Fmnl3	7.2007	0.677069	0.60035	1.12779	0.259409	0.999959	L4/5 IT Glut4	up
Il17re	2.13693	0.676737	1.15957	0.583611	0.559482	0.999959	L4/5 IT Glut4	up
Fam160a1	1.82827	0.675927	1.20263	0.562043	0.574087	0.999959	L4/5 IT Glut4	up
Bcl11b	1.39515	0.675807	1.45542	0.464338	0.642406	0.999959	L4/5 IT Glut4	up
Actl6a	12.3453	0.675754	0.489885	1.37941	0.167767	0.999959	L4/5 IT Glut4	up
Dph7	15.1046	0.675185	0.415342	1.62561	0.104032	0.999959	L4/5 IT Glut4	up
Rhot2	14.676	0.674959	0.420873	1.60371	0.108778	0.999959	L4/5 IT Glut4	up
Adprhl2	7.9965	0.674495	0.561927	1.20032	0.230013	0.999959	L4/5 IT Glut4	up
Spink8	0.97232	0.674307	1.64575	0.409726	0.682007	0.999959	L4/5 IT Glut4	up
Ttc39d	1.0584	0.673293	1.53387	0.438951	0.660697	0.999959	L4/5 IT Glut4	up
Wnt2	1.91569	0.672715	1.29998	0.51748	0.604821	0.999959	L4/5 IT Glut4	up
Bnipl	2.05421	0.672182	1.10322	0.609291	0.542331	0.999959	L4/5 IT Glut4	up
Zfp418	2.4355	0.671805	1.07913	0.622546	0.533583	0.999959	L4/5 IT Glut4	up
Mrgbp	6.96294	0.671371	0.635048	1.0572	0.290422	0.999959	L4/5 IT Glut4	up
Cnbd1	0.397535	0.670456	2.8221842456124002	0.237566	0.812217	0.999959	L4/5 IT Glut4	up
Gpr135	3.19616	0.670234	0.937577	0.714858	0.474697	0.999959	L4/5 IT Glut4	up
Cby1	7.65085	0.669487	0.594084	1.12692	0.259775	0.999959	L4/5 IT Glut4	up
Rhoq	6.28613	0.669395	0.642571	1.04174	0.297531	0.999959	L4/5 IT Glut4	up
Coprs	3.72889	0.668756	0.838762	0.797313	0.425269	0.999959	L4/5 IT Glut4	up
Ss18l2	2.30489	0.668661	1.12656	0.593544	0.552817	0.999959	L4/5 IT Glut4	up
Ppie	3.55511	0.66809	0.848421	0.787451	0.431018	0.999959	L4/5 IT Glut4	up
Pik3ip1	8.27304	0.666939	0.546304	1.22082	0.222154	0.999959	L4/5 IT Glut4	up
Eral1	7.06644	0.666853	0.590169	1.12994	0.258503	0.999959	L4/5 IT Glut4	up
P3h1	5.60133	0.665881	0.665108	1.00116	0.316749	0.999959	L4/5 IT Glut4	up
Paxx	3.65981	0.665825	0.85199	0.781494	0.434512	0.999959	L4/5 IT Glut4	up
Mocs3	0.825755	0.665353	1.65929	0.400988	0.688429	0.999959	L4/5 IT Glut4	up
Aurkaip1	2.72581	0.664711	1.02639	0.647621	0.51723	0.999959	L4/5 IT Glut4	up
Tmem107	2.19961	0.664578	1.14076	0.582576	0.560179	0.999959	L4/5 IT Glut4	up
Mpi	2.92483	0.664348	0.939248	0.70732	0.479368	0.999959	L4/5 IT Glut4	up
Ttc9b	2.73853	0.663916	1.19435	0.555882	0.578291	0.999959	L4/5 IT Glut4	up
Inafm1	4.00178	0.663831	0.79149	0.83871	0.401632	0.999959	L4/5 IT Glut4	up
H2-D1	3.40456	0.663753	0.912873	0.727103	0.467163	0.999959	L4/5 IT Glut4	up
Nkd1	0.487689	0.662984	2.28264	0.290447	0.771475	0.999959	L4/5 IT Glut4	up
Rara	3.88449	0.66291	0.790298	0.83881	0.401576	0.999959	L4/5 IT Glut4	up
Nfkb2	5.10893	0.662834	0.704442	0.940935	0.346738	0.999959	L4/5 IT Glut4	up
Lmod1	0.975778	0.662678	1.79235	0.369726	0.711586	0.999959	L4/5 IT Glut4	up
Ecm2	2.09793	0.662339	1.16199	0.570004	0.568675	0.999959	L4/5 IT Glut4	up
Bdkrb2	0.336496	0.661916	3.00116	0.220553	0.82544	0.999959	L4/5 IT Glut4	up
Pcdhb8	0.336496	0.661916	3.00116	0.220553	0.82544	0.999959	L4/5 IT Glut4	up
Hes1	4.10992	0.660634	0.859754	0.768399	0.44225	0.999959	L4/5 IT Glut4	up
Ccdc181	3.32656	0.659596	0.879264	0.750168	0.453153	0.999959	L4/5 IT Glut4	up
Lrrc42	9.06205	0.659283	0.541424	1.21768	0.223344	0.999959	L4/5 IT Glut4	up
Crispld1	6.52533	0.658062	0.710696	0.92594	0.354477	0.999959	L4/5 IT Glut4	up
Prrt3	6.18975	0.658002	0.640829	1.0268	0.304515	0.999959	L4/5 IT Glut4	up
Sccpdh	9.30797	0.657204	0.515817	1.2741	0.202627	0.999959	L4/5 IT Glut4	up
Pllp	0.272413	0.656882	3.13953	0.209229	0.834269	0.999959	L4/5 IT Glut4	up
Tpbg	0.272413	0.656882	3.13953	0.209229	0.834269	0.999959	L4/5 IT Glut4	up
1700093K21Rik	0.272413	0.656882	3.13953	0.209229	0.834269	0.999959	L4/5 IT Glut4	up
Lgals9	0.272413	0.656882	3.13953	0.209229	0.834269	0.999959	L4/5 IT Glut4	up
Cth	0.445604	0.65678	2.3295	0.281941	0.777989	0.999959	L4/5 IT Glut4	up
Zfp607b	10.8067	0.656704	0.484829	1.35451	0.175575	0.999959	L4/5 IT Glut4	up
Nkiras2	1.1154	0.65637569043728194	1.4891	0.440786	0.659368	0.999959	L4/5 IT Glut4	up
Hscb	4.56105	0.656375	0.794333	0.826323	0.408621	0.999959	L4/5 IT Glut4	up
Insl5	0.797279	0.655786	1.86648	0.351349	0.725326	0.999959	L4/5 IT Glut4	up
Aff1	4.1217	0.655344	0.793809	0.825569	0.409049	0.999959	L4/5 IT Glut4	up
Dnajc5b	0.486449	0.655017	2.37929	0.2753	0.783086	0.999959	L4/5 IT Glut4	up
Hpcal1	4.26193	0.654845	0.822557	0.796109	0.425968	0.999959	L4/5 IT Glut4	up
Chmp2a	6.28125	0.654752	0.661415	0.989926	0.32221	0.999959	L4/5 IT Glut4	up
Lyar	2.84984	0.653646	0.939138	0.696006	0.486425	0.999959	L4/5 IT Glut4	up
Akap14	2.30386	0.653611	1.12222	0.582428	0.560279	0.999959	L4/5 IT Glut4	up
Cpt1b	1.43655	0.652869	1.25922	0.518472	0.604129	0.999959	L4/5 IT Glut4	up
Fam118a	4.61589	0.652739	0.738078	0.884378	0.376492	0.999959	L4/5 IT Glut4	up
Slc35e3	3.32001	0.652379	0.864366	0.754748	0.4504	0.999959	L4/5 IT Glut4	up
Nupl2	13.8207	0.652148	0.423672	1.53927	0.123737	0.999959	L4/5 IT Glut4	up
1810030O07Rik	8.96812	0.651384	0.524615	1.24164	0.214369	0.999959	L4/5 IT Glut4	up
Acy1	1.53839	0.650988	1.28658	0.505983	0.612868	0.999959	L4/5 IT Glut4	up
Snf8	17.473	0.650848	0.383768	1.69594	0.0898973	0.999959	L4/5 IT Glut4	up
Tmem236	0.531289	0.650515	2.20636	0.294836	0.768119	0.999959	L4/5 IT Glut4	up
Lsm2	2.81032	0.650234	0.999454	0.650589	0.515312	0.999959	L4/5 IT Glut4	up
Use1	1.85834	0.649209	1.20077	0.540659	0.588742	0.999959	L4/5 IT Glut4	up
Frrs1	0.398352	0.649044	2.81752	0.23036	0.817812	0.999959	L4/5 IT Glut4	up
Rbm15b	2.66202	0.647616	0.981128	0.660073	0.509207	0.999959	L4/5 IT Glut4	up
Cox14	5.39698	0.64703	0.731378	0.884673	0.376333	0.999959	L4/5 IT Glut4	up
Gpam	9.92989	0.647012	0.519104	1.2464	0.212617	0.999959	L4/5 IT Glut4	up
Pgam5	11.7601	0.646687	0.507644	1.2739	0.202699	0.999959	L4/5 IT Glut4	up
Xaf1	1.7631	0.646082	1.30143	0.496439	0.619585	0.999959	L4/5 IT Glut4	up
Maml3	343.203	0.643129	0.13166	4.88478	1.03547022682097e-6	0.0157091	L4/5 IT Glut4	up
Vtcn1	0.659826	0.642214	2.30588	0.278511	0.78062	0.999959	L4/5 IT Glut4	up
Pold4	0.963992	0.641746	1.72423	0.372194	0.709749	0.999959	L4/5 IT Glut4	up
Nppa	0.549334	0.641027	2.49365	0.257064	0.797129	0.999959	L4/5 IT Glut4	up
Sspn	0.549334	0.641027	2.49365	0.257064	0.797129	0.999959	L4/5 IT Glut4	up
Ccdc88c	21.1693	0.640715	0.351386	1.82339	0.0682438	0.999959	L4/5 IT Glut4	up
Lmo2	0.327407	0.640505	3.02213	0.211938	0.832155	0.999959	L4/5 IT Glut4	up
Ddit3	0.953734	0.639965	1.65423	0.386866	0.698856	0.999959	L4/5 IT Glut4	up
E130309D02Rik	4.44677	0.639138	0.775062	0.824628	0.409583	0.999959	L4/5 IT Glut4	up
Ddx59	3.81003	0.638468	0.814014	0.784346	0.432837	0.999959	L4/5 IT Glut4	up
Mki67	1.1948	0.637532	1.44977	0.439748	0.66012	0.999959	L4/5 IT Glut4	up
Dhfr	2.60012	0.637258	0.952223	0.669232	0.503348	0.999959	L4/5 IT Glut4	up
Tfpt	3.77312	0.637015	0.842086	0.756472	0.449366	0.999959	L4/5 IT Glut4	up
Cdh4	26.9145	0.636882	0.31021	2.05307	0.0400661	0.999959	L4/5 IT Glut4	up
Trmt44	3.84127	0.636741	0.799959	0.795967	0.426051	0.999959	L4/5 IT Glut4	up
Wars	9.43288	0.636326	0.515751	1.23378	0.217283	0.999959	L4/5 IT Glut4	up
Znhit2	0.564472	0.635994	2.43641	0.261038	0.794063	0.999959	L4/5 IT Glut4	up
Marcksl1	0.817284	0.635953	1.98022	0.321152	0.748095	0.999959	L4/5 IT Glut4	up
Rnd3	19.8575	0.635808	0.387506	1.6407699712194601	0.100845	0.999959	L4/5 IT Glut4	up
Txnl4b	0.456388	0.635502	2.65785	0.239104	0.811025	0.999959	L4/5 IT Glut4	up
Lrrc14	4.81203	0.634774	0.727977	0.87197	0.383225	0.999959	L4/5 IT Glut4	up
Cobll1	0.523871	0.634613	2.2034	0.288016	0.773335	0.999959	L4/5 IT Glut4	up
Hist2h4	0.523871	0.634613	2.2034	0.288016	0.773335	0.999959	L4/5 IT Glut4	up
Gm17509	0.972505	0.634118	1.76365	0.359549	0.719184	0.999959	L4/5 IT Glut4	up
Sycp3	6.78326	0.634113	0.630694	1.00542	0.314694	0.999959	L4/5 IT Glut4	up
Hist1h1c	1.12508	0.634077	1.6628	0.381331	0.702958	0.999959	L4/5 IT Glut4	up
Cela1	0.537596	0.633883	2.16258	0.293115	0.769434	0.999959	L4/5 IT Glut4	up
Luzp2	22.2281	0.633764	0.393612	1.61013	0.10737	0.999959	L4/5 IT Glut4	up
Mtrf1	3.12423	0.632383	0.912115	0.693314	0.488112	0.999959	L4/5 IT Glut4	up
Cstf1	1.86113	0.631211	1.1805	0.534696	0.59286	0.999959	L4/5 IT Glut4	up
Igsf3	21.0256	0.630768	0.353757	1.78306	0.074577	0.999959	L4/5 IT Glut4	up
Dph3	7.35321	0.629253	0.602794	1.0439	0.296534	0.999959	L4/5 IT Glut4	up
Adamtsl3	1.00398	0.629196	1.81199	0.34724	0.728411	0.999959	L4/5 IT Glut4	up
Dmrta2	1.85156	0.629085	1.22533	0.513399	0.607672	0.999959	L4/5 IT Glut4	up
Prr7	9.44919	0.62886	0.522203	1.20424	0.228495	0.999959	L4/5 IT Glut4	up
Oacyl	8.5049	0.628692	0.548126	1.14699	0.251387	0.999959	L4/5 IT Glut4	up
Lman2	6.85307	0.628127	0.616623	1.01866	0.308366	0.999959	L4/5 IT Glut4	up
Cacybp	9.5082	0.627882	0.535622	1.17225	0.241097	0.999959	L4/5 IT Glut4	up
Dchs2	0.515577	0.627337	2.54902	0.246109	0.805598	0.999959	L4/5 IT Glut4	up
Opn5	0.515577	0.627337	2.54902	0.246109	0.805598	0.999959	L4/5 IT Glut4	up
Fermt3	0.515577	0.627337	2.54902	0.246109	0.805598	0.999959	L4/5 IT Glut4	up
Gm10037	4.3591	0.625926	0.768802	0.814157	0.415555	0.999959	L4/5 IT Glut4	up
Pdzd9	0.303555	0.624922	3.12058	0.200258	0.841279	0.999959	L4/5 IT Glut4	up
Tedc1	0.303555	0.624922	3.12058	0.200258	0.841279	0.999959	L4/5 IT Glut4	up
Mrpl51	3.43881	0.624476	0.822797	0.758968	0.447872	0.999959	L4/5 IT Glut4	up
Sept10	2.12788	0.624154	1.07542	0.58038	0.561658	0.999959	L4/5 IT Glut4	up
Ptpn14	0.328223	0.623557	3.01711	0.206674	0.836265	0.999959	L4/5 IT Glut4	up
Pcdha3	0.328223	0.623557	3.01711	0.206674	0.836265	0.999959	L4/5 IT Glut4	up
Alg12	4.26267	0.623379	0.782772	0.796374	0.425815	0.999959	L4/5 IT Glut4	up
Hmga1	0.364595	0.623075	2.9123	0.213946	0.830589	0.999959	L4/5 IT Glut4	up
Fam192a	8.95835	0.623003	0.523432	1.19023	0.233957	0.999959	L4/5 IT Glut4	up
Ccdc51	3.72584	0.622925	0.839644	0.741892	0.458153	0.999959	L4/5 IT Glut4	up
Limd2	4.86469	0.622884	0.730017	0.853246	0.393523	0.999959	L4/5 IT Glut4	up
Bag6	9.33401	0.62211	0.552488	1.12601	0.260159	0.999959	L4/5 IT Glut4	up
Exosc8	6.74486	0.621866	0.659396	0.943085	0.345638	0.999959	L4/5 IT Glut4	up
Zbed3	3.03023	0.620772	0.916832	0.677084	0.498353	0.999959	L4/5 IT Glut4	up
Armcx3	6.95576	0.62047	0.644059	0.963375	0.335359	0.999959	L4/5 IT Glut4	up
4931422A03Rik	0.520804	0.62003	2.54317	0.243803	0.807384	0.999959	L4/5 IT Glut4	up
Fezf2	1.41954	0.619887	1.37547	0.450674	0.652224	0.999959	L4/5 IT Glut4	up
Spef1	2.03412	0.619776	1.14345	0.542025	0.587801	0.999959	L4/5 IT Glut4	up
Col5a1	7.89656	0.619074	0.648584	0.9545	0.339831	0.999959	L4/5 IT Glut4	up
Tfam	5.76955	0.619065	0.668929	0.925457	0.354728	0.999959	L4/5 IT Glut4	up
Fam3a	5.20861	0.619032	0.699146	0.885413	0.375934	0.999959	L4/5 IT Glut4	up
Hpn	2.39469	0.618924	1.01124	0.612044	0.540509	0.999959	L4/5 IT Glut4	up
Trpv6	1.94759	0.618782	1.1144	0.555259	0.578718	0.999959	L4/5 IT Glut4	up
Dok3	7.27418	0.618771	0.622896	0.993377	0.320526	0.999959	L4/5 IT Glut4	up
Mif	6.24545	0.617739	0.664778	0.929241	0.352764	0.999959	L4/5 IT Glut4	up
Ccpg1os	2.27388	0.617711	1.04202	0.5928	0.553315	0.999959	L4/5 IT Glut4	up
Arf6	0.352863	0.617321	2.90467	0.212527	0.831696	0.999959	L4/5 IT Glut4	up
Mical1	0.938936	0.617069	1.60877	0.383566	0.7013	0.999959	L4/5 IT Glut4	up
Myl1	1.17645	0.616703	1.42803	0.431856	0.665846	0.999959	L4/5 IT Glut4	up
Nt5m	11.4933	0.616676	0.466373	1.32228	0.186075	0.999959	L4/5 IT Glut4	up
Inf2	20.8446	0.616474	0.357582	1.72401	0.0847068	0.999959	L4/5 IT Glut4	up
Fdps	6.00684	0.616392	0.717065	0.859604	0.390008	0.999959	L4/5 IT Glut4	up
Gm10309	1.65739	0.616057	1.26487	0.487051	0.626222	0.999959	L4/5 IT Glut4	up
Taf1c	4.619	0.61602	0.740356	0.832059	0.405376	0.999959	L4/5 IT Glut4	up
Scel	0.7112	0.615678	1.93035	0.318946	0.749767	0.999959	L4/5 IT Glut4	up
Epha8	1.58582	0.615602	1.34382	0.458098	0.646882	0.999959	L4/5 IT Glut4	up
Hykk	2.27662	0.615058	1.04944	0.586081	0.557821	0.999959	L4/5 IT Glut4	up
Mrm3	4.10969	0.614758	0.79773	0.770634	0.440924	0.999959	L4/5 IT Glut4	up
Hba-a1	2.39053	0.613573	1.19455	0.513646	0.607499	0.999959	L4/5 IT Glut4	up
Nab1	15.9039	0.61337	0.405447	1.51282	0.130324	0.999959	L4/5 IT Glut4	up
Rtkn2	3.27857	0.613105	0.871274	0.703688	0.481627	0.999959	L4/5 IT Glut4	up
Rps9	8.17646	0.613058	0.590524	1.03816	0.299196	0.999959	L4/5 IT Glut4	up
Tcerg1l	6.27126	0.612138	0.71362	0.857792	0.391007	0.999959	L4/5 IT Glut4	up
Stard4	4.10689	0.61144	0.753279	0.811704	0.416962	0.999959	L4/5 IT Glut4	up
Zfp637	5.33896	0.611417	0.6793	0.900068	0.368084	0.999959	L4/5 IT Glut4	up
Tmem35b	2.05999	0.611254	1.11773	0.546873	0.584466	0.999959	L4/5 IT Glut4	up
Smco3	0.33081	0.610905	3.02953	0.20165	0.84019	0.999959	L4/5 IT Glut4	up
A930009A15Rik	0.33081	0.610905	3.02953	0.20165	0.84019	0.999959	L4/5 IT Glut4	up
Dynlrb1	7.96544	0.610578	0.610091	1.0008	0.316924	0.999959	L4/5 IT Glut4	up
Ing1	4.4637	0.610176	0.764581	0.798053	0.424839	0.999959	L4/5 IT Glut4	up
Rmnd1	23.56	0.610161	0.329692	1.8507	0.0642124	0.999959	L4/5 IT Glut4	up
Prss23	0.394921	0.609846	2.81265	0.216822	0.828347	0.999959	L4/5 IT Glut4	up
Disp3	12.9832	0.608397	0.439105	1.38554	0.165888	0.999959	L4/5 IT Glut4	up
Ndrg2	4.51948	0.608263	0.991364	0.613562	0.539505	0.999959	L4/5 IT Glut4	up
Ak6	9.34295	0.607572	0.508989	1.19368	0.232601	0.999959	L4/5 IT Glut4	up
Nop53	3.98945	0.60733	0.859888	0.70629	0.480008	0.999959	L4/5 IT Glut4	up
Wdr45	8.57	0.607047	0.539901	1.12437	0.260857	0.999959	L4/5 IT Glut4	up
Shkbp1	9.83214	0.606724	0.517314	1.17283	0.240862	0.999959	L4/5 IT Glut4	up
Decr1	1.53697	0.606671	1.27876	0.474421	0.6352	0.999959	L4/5 IT Glut4	up
Pigp	3.0804	0.606321	0.96582	0.627778	0.530149	0.999959	L4/5 IT Glut4	up
Zdhhc12	0.447824	0.60612	2.65447	0.228339	0.819383	0.999959	L4/5 IT Glut4	up
Laptm5	0.447824	0.60612	2.65447	0.228339	0.819383	0.999959	L4/5 IT Glut4	up
Zfp946	6.80482	0.605768	0.627615	0.96519	0.33445	0.999959	L4/5 IT Glut4	up
Rela	9.47296	0.605375	0.523796	1.15575	0.247785	0.999959	L4/5 IT Glut4	up
Rpl35	4.83304	0.605104	0.900877	0.671683	0.501785	0.999959	L4/5 IT Glut4	up
Cct4	11.0717	0.605007	0.507096	1.19308	0.232837	0.999959	L4/5 IT Glut4	up
Cenpo	1.9943	0.604781	1.21099	0.49941	0.61749	0.999959	L4/5 IT Glut4	up
Trmt112	3.73123	0.603571	0.884921	0.682062	0.4952	0.999959	L4/5 IT Glut4	up
Gins1	0.89124	0.602589	1.76116	0.342155	0.732234	0.999959	L4/5 IT Glut4	up
Tex30	1.41081	0.602237	1.31796	0.456945	0.64771	0.999959	L4/5 IT Glut4	up
Creld2	1.70673	0.600833	1.28489	0.467616	0.640059	0.999959	L4/5 IT Glut4	up
Prmt7	27.8696	0.600611	0.304651	1.97147	0.0486698	0.999959	L4/5 IT Glut4	up
Ssr2	5.33016	0.600558	0.697882	0.860544	0.389489	0.999959	L4/5 IT Glut4	up
Tfap2b	0.0978197	0.600362	3.15812	0.190101	0.84923	0.999959	L4/5 IT Glut4	up
Fzd7	0.0978197	0.600362	3.15812	0.190101	0.84923	0.999959	L4/5 IT Glut4	up
Cryba2	0.0978197	0.600362	3.15812	0.190101	0.84923	0.999959	L4/5 IT Glut4	up
C130026I21Rik	0.0978197	0.600362	3.15812	0.190101	0.84923	0.999959	L4/5 IT Glut4	up
Glrp1	0.0978197	0.600362	3.15812	0.190101	0.84923	0.999959	L4/5 IT Glut4	up
Serpinb5	0.0978197	0.600362	3.15812	0.190101	0.84923	0.999959	L4/5 IT Glut4	up
Sctr	0.0978197	0.600362	3.15812	0.190101	0.84923	0.999959	L4/5 IT Glut4	up
Cdnf	0.0978197	0.600362	3.15812	0.190101	0.84923	0.999959	L4/5 IT Glut4	up
Traf1	0.0978197	0.600362	3.15812	0.190101	0.84923	0.999959	L4/5 IT Glut4	up
Morn5	0.0978197	0.600362	3.15812	0.190101	0.84923	0.999959	L4/5 IT Glut4	up
Pramel7	0.0978197	0.600362	3.15812	0.190101	0.84923	0.999959	L4/5 IT Glut4	up
Tspan18	0.0978197	0.600362	3.15812	0.190101	0.84923	0.999959	L4/5 IT Glut4	up
Wfdc8	0.0978197	0.600362	3.15812	0.190101	0.84923	0.999959	L4/5 IT Glut4	up
Spo11	0.0978197	0.600362	3.15812	0.190101	0.84923	0.999959	L4/5 IT Glut4	up
1810062G17Rik	0.0978197	0.600362	3.15812	0.190101	0.84923	0.999959	L4/5 IT Glut4	up
Tmod4	0.0978197	0.600362	3.15812	0.190101	0.84923	0.999959	L4/5 IT Glut4	up
Syt6	0.0978197	0.600362	3.15812	0.190101	0.84923	0.999959	L4/5 IT Glut4	up
Gabrr2	0.0978197	0.600362	3.15812	0.190101	0.84923	0.999959	L4/5 IT Glut4	up
Glipr2	0.0978197	0.600362	3.15812	0.190101	0.84923	0.999959	L4/5 IT Glut4	up
Cdkn2b	0.0978197	0.600362	3.15812	0.190101	0.84923	0.999959	L4/5 IT Glut4	up
Agtrap	0.0978197	0.600362	3.15812	0.190101	0.84923	0.999959	L4/5 IT Glut4	up
Draxin	0.0978197	0.600362	3.15812	0.190101	0.84923	0.999959	L4/5 IT Glut4	up
Cnpy1	0.0978197	0.600362	3.15812	0.190101	0.84923	0.999959	L4/5 IT Glut4	up
3110082J24Rik	0.0978197	0.600362	3.15812	0.190101	0.84923	0.999959	L4/5 IT Glut4	up
Garem2	0.0978197	0.600362	3.15812	0.190101	0.84923	0.999959	L4/5 IT Glut4	up
Sod3	0.0978197	0.600362	3.15812	0.190101	0.84923	0.999959	L4/5 IT Glut4	up
Tecrl	0.0978197	0.600362	3.15812	0.190101	0.84923	0.999959	L4/5 IT Glut4	up
Dao	0.0978197	0.600362	3.15812	0.190101	0.84923	0.999959	L4/5 IT Glut4	up
Ccdc63	0.0978197	0.600362	3.15812	0.190101	0.84923	0.999959	L4/5 IT Glut4	up
B3gnt4	0.0978197	0.600362	3.15812	0.190101	0.84923	0.999959	L4/5 IT Glut4	up
Hspb1	0.0978197	0.600362	3.15812	0.190101	0.84923	0.999959	L4/5 IT Glut4	up
Cped1	0.0978197	0.600362	3.15812	0.190101	0.84923	0.999959	L4/5 IT Glut4	up
Clec5a	0.0978197	0.600362	3.15812	0.190101	0.84923	0.999959	L4/5 IT Glut4	up
Sspo	0.0978197	0.600362	3.15812	0.190101	0.84923	0.999959	L4/5 IT Glut4	up
Gimap9	0.0978197	0.600362	3.15812	0.190101	0.84923	0.999959	L4/5 IT Glut4	up
Gimap1	0.0978197	0.600362	3.15812	0.190101	0.84923	0.999959	L4/5 IT Glut4	up
Ninj2	0.0978197	0.600362	3.15812	0.190101	0.84923	0.999959	L4/5 IT Glut4	up
Apold1	0.0978197	0.600362	3.15812	0.190101	0.84923	0.999959	L4/5 IT Glut4	up
Smco2	0.0978197	0.600362	3.15812	0.190101	0.84923	0.999959	L4/5 IT Glut4	up
Tnni3	0.0978197	0.600362	3.15812	0.190101	0.84923	0.999959	L4/5 IT Glut4	up
Zbtb32	0.0978197	0.600362	3.15812	0.190101	0.84923	0.999959	L4/5 IT Glut4	up
Aspdh	0.0978197	0.600362	3.15812	0.190101	0.84923	0.999959	L4/5 IT Glut4	up
4933405O20Rik	0.0978197	0.600362	3.15812	0.190101	0.84923	0.999959	L4/5 IT Glut4	up
Slco2b1	0.0978197	0.600362	3.15812	0.190101	0.84923	0.999959	L4/5 IT Glut4	up
Olfr558	0.0978197	0.600362	3.15812	0.190101	0.84923	0.999959	L4/5 IT Glut4	up
Trim34a	0.0978197	0.600362	3.15812	0.190101	0.84923	0.999959	L4/5 IT Glut4	up
Trim12c	0.0978197	0.600362	3.15812	0.190101	0.84923	0.999959	L4/5 IT Glut4	up
Rab11fip1	0.0978197	0.600362	3.15812	0.190101	0.84923	0.999959	L4/5 IT Glut4	up
F11	0.0978197	0.600362	3.15812	0.190101	0.84923	0.999959	L4/5 IT Glut4	up
Nat2	0.0978197	0.600362	3.15812	0.190101	0.84923	0.999959	L4/5 IT Glut4	up
Cdh5	0.0978197	0.600362	3.15812	0.190101	0.84923	0.999959	L4/5 IT Glut4	up
Hsd17b2	0.0978197	0.600362	3.15812	0.190101	0.84923	0.999959	L4/5 IT Glut4	up
Trim67	0.0978197	0.600362	3.15812	0.190101	0.84923	0.999959	L4/5 IT Glut4	up
Muc16	0.0978197	0.600362	3.15812	0.190101	0.84923	0.999959	L4/5 IT Glut4	up
Plet1	0.0978197	0.600362	3.15812	0.190101	0.84923	0.999959	L4/5 IT Glut4	up
Btg4	0.0978197	0.600362	3.15812	0.190101	0.84923	0.999959	L4/5 IT Glut4	up
Loxl1	0.0978197	0.600362	3.15812	0.190101	0.84923	0.999959	L4/5 IT Glut4	up
Bcl2l10	0.0978197	0.600362	3.15812	0.190101	0.84923	0.999959	L4/5 IT Glut4	up
Cdhr4	0.0978197	0.600362	3.15812	0.190101	0.84923	0.999959	L4/5 IT Glut4	up
Frk	0.0978197	0.600362	3.15812	0.190101	0.84923	0.999959	L4/5 IT Glut4	up
2610028H24Rik	0.0978197	0.600362	3.15812	0.190101	0.84923	0.999959	L4/5 IT Glut4	up
Cdk2	0.0978197	0.600362	3.15812	0.190101	0.84923	0.999959	L4/5 IT Glut4	up
Fgf18	0.0978197	0.600362	3.15812	0.190101	0.84923	0.999959	L4/5 IT Glut4	up
Irgm2	0.0978197	0.600362	3.15812	0.190101	0.84923	0.999959	L4/5 IT Glut4	up
Olfr328	0.0978197	0.600362	3.15812	0.190101	0.84923	0.999959	L4/5 IT Glut4	up
Tnfrsf13b	0.0978197	0.600362	3.15812	0.190101	0.84923	0.999959	L4/5 IT Glut4	up
Aldh3a1	0.0978197	0.600362	3.15812	0.190101	0.84923	0.999959	L4/5 IT Glut4	up
Tnfsf13	0.0978197	0.600362	3.15812	0.190101	0.84923	0.999959	L4/5 IT Glut4	up
Greb1	0.0978197	0.600362	3.15812	0.190101	0.84923	0.999959	L4/5 IT Glut4	up
Crip1	0.0978197	0.600362	3.15812	0.190101	0.84923	0.999959	L4/5 IT Glut4	up
Zfp456	0.0978197	0.600362	3.15812	0.190101	0.84923	0.999959	L4/5 IT Glut4	up
Fam81b	0.0978197	0.600362	3.15812	0.190101	0.84923	0.999959	L4/5 IT Glut4	up
Naip5	0.0978197	0.600362	3.15812	0.190101	0.84923	0.999959	L4/5 IT Glut4	up
Gm3264	0.0978197	0.600362	3.15812	0.190101	0.84923	0.999959	L4/5 IT Glut4	up
Anxa8	0.0978197	0.600362	3.15812	0.190101	0.84923	0.999959	L4/5 IT Glut4	up
Gch1	0.0978197	0.600362	3.15812	0.190101	0.84923	0.999959	L4/5 IT Glut4	up
Zic5	0.0978197	0.600362	3.15812	0.190101	0.84923	0.999959	L4/5 IT Glut4	up
Ncf4	0.0978197	0.600362	3.15812	0.190101	0.84923	0.999959	L4/5 IT Glut4	up
Cdc42ep1	0.0978197	0.600362	3.15812	0.190101	0.84923	0.999959	L4/5 IT Glut4	up
Sp7	0.0978197	0.600362	3.15812	0.190101	0.84923	0.999959	L4/5 IT Glut4	up
B3gnt5	0.0978197	0.600362	3.15812	0.190101	0.84923	0.999959	L4/5 IT Glut4	up
Gm10226	0.0978197	0.600362	3.15812	0.190101	0.84923	0.999959	L4/5 IT Glut4	up
Adgrf5	0.0978197	0.600362	3.15812	0.190101	0.84923	0.999959	L4/5 IT Glut4	up
Slc22a7	0.0978197	0.600362	3.15812	0.190101	0.84923	0.999959	L4/5 IT Glut4	up
Trem3	0.0978197	0.600362	3.15812	0.190101	0.84923	0.999959	L4/5 IT Glut4	up
Klhl14	0.0978197	0.600362	3.15812	0.190101	0.84923	0.999959	L4/5 IT Glut4	up
Tslp	0.0978197	0.600362	3.15812	0.190101	0.84923	0.999959	L4/5 IT Glut4	up
Pcdhgb2	0.0978197	0.600362	3.15812	0.190101	0.84923	0.999959	L4/5 IT Glut4	up
Pcdhgb7	0.0978197	0.600362	3.15812	0.190101	0.84923	0.999959	L4/5 IT Glut4	up
Gpr151	0.0978197	0.600362	3.15812	0.190101	0.84923	0.999959	L4/5 IT Glut4	up
Myoz3	0.0978197	0.600362	3.15812	0.190101	0.84923	0.999959	L4/5 IT Glut4	up
Arsi	0.0978197	0.600362	3.15812	0.190101	0.84923	0.999959	L4/5 IT Glut4	up
Ms4a6c	0.0978197	0.600362	3.15812	0.190101	0.84923	0.999959	L4/5 IT Glut4	up
Lipk	0.0978197	0.600362	3.15812	0.190101	0.84923	0.999959	L4/5 IT Glut4	up
Dcaf12l2	0.0978197	0.600362	3.15812	0.190101	0.84923	0.999959	L4/5 IT Glut4	up
Gpr119	0.0978197	0.600362	3.15812	0.190101	0.84923	0.999959	L4/5 IT Glut4	up
Plac1	0.0978197	0.600362	3.15812	0.190101	0.84923	0.999959	L4/5 IT Glut4	up
Usp9y	0.0978197	0.600362	3.15812	0.190101	0.84923	0.999959	L4/5 IT Glut4	up
Pdc	0.0978197	0.600362	3.15812	0.190101	0.84923	0.999959	L4/5 IT Glut4	up
Ifi206	0.0978197	0.600362	3.15812	0.190101	0.84923	0.999959	L4/5 IT Glut4	up
Gm17555	0.0978197	0.600362	3.15812	0.190101	0.84923	0.999959	L4/5 IT Glut4	up
Pax1	0.0978197	0.600362	3.15812	0.190101	0.84923	0.999959	L4/5 IT Glut4	up
Actr5	4.47494	0.600129	0.773062	0.776301	0.437571	0.999959	L4/5 IT Glut4	up
Taf9	0.382128	0.599905	2.85366	0.210223	0.833494	0.999959	L4/5 IT Glut4	up
4930522L14Rik	1.66632	0.59984	1.16977	0.512783	0.608103	0.999959	L4/5 IT Glut4	up
Cd55	0.422803	0.59938	2.37091	0.252805	0.800419	0.999959	L4/5 IT Glut4	up
Sult3a2	0.431285	0.59904	2.73252	0.219226	0.826474	0.999959	L4/5 IT Glut4	up
Bche	1.35587	0.598401	1.33534	0.448127	0.654061	0.999959	L4/5 IT Glut4	up
Flywch2	2.16776	0.598359	1.11984	0.534325	0.593117	0.999959	L4/5 IT Glut4	up
Rbpms	0.24637	0.598326	3.14914	0.189996	0.849312	0.999959	L4/5 IT Glut4	up
Casp8ap2	12.3988	0.598085	0.482501	1.23955	0.215141	0.999959	L4/5 IT Glut4	up
Sox12	3.86374	0.597652	0.846207	0.706271	0.480019	0.999959	L4/5 IT Glut4	up
Vstm5	12.6361	0.597583	0.450132	1.32757	0.18432	0.999959	L4/5 IT Glut4	up
Cmc2	7.12746	0.597431	0.617375	0.967695	0.333197	0.999959	L4/5 IT Glut4	up
Ccnj	4.94373	0.597136	0.76357	0.782032	0.434196	0.999959	L4/5 IT Glut4	up
Stard8	34.0186	0.596706	0.31774	1.87797	0.0603856	0.999959	L4/5 IT Glut4	up
Slco1a4	0.93111	0.596492	1.87496	0.318136	0.750382	0.999959	L4/5 IT Glut4	up
Eif5a	6.85875	0.596016	0.63662	0.936219	0.349161	0.999959	L4/5 IT Glut4	up
Inip	5.8374	0.595872	0.656852	0.907163	0.36432	0.999959	L4/5 IT Glut4	up
Rpp14	5.51333	0.595755	0.680029	0.876072	0.380991	0.999959	L4/5 IT Glut4	up
Itgb3	2.01983	0.595681	1.10873	0.537266	0.591084	0.999959	L4/5 IT Glut4	up
Wdr62	0.446211	0.595404	2.68984	0.221353	0.824818	0.999959	L4/5 IT Glut4	up
Tmc4	8.41248	0.595221	0.532413	1.11797	0.26358	0.999959	L4/5 IT Glut4	up
Slc27a2	2.57539	0.594999	0.963049	0.617828	0.536689	0.999959	L4/5 IT Glut4	up
Snrpd3	9.23633	0.594688	0.525198	1.13231	0.257503	0.999959	L4/5 IT Glut4	up
Flvcr2	0.271827	0.594548	3.12805	0.190069	0.849255	0.999959	L4/5 IT Glut4	up
Psmb9	0.271827	0.594548	3.12805	0.190069	0.849255	0.999959	L4/5 IT Glut4	up
Lurap1	10.2231	0.59399	0.521231	1.13959	0.254457	0.999959	L4/5 IT Glut4	up
Asah2	3.6473	0.59386	0.832779	0.713106	0.47578	0.999959	L4/5 IT Glut4	up
Sh2d4b	6.68662	0.593796	0.617761	0.961207	0.336448	0.999959	L4/5 IT Glut4	up
Myo19	18.5891	0.593331	0.376796	1.57467	0.115332	0.999959	L4/5 IT Glut4	up
Ackr3	0.437732	0.593195	2.32608	0.255019	0.798708	0.999959	L4/5 IT Glut4	up
Fgf22	3.0332	0.592785	0.900065	0.65860206741804606	0.510151	0.999959	L4/5 IT Glut4	up
Bag5	2.54475	0.592114	1.09618	0.540161	0.589086	0.999959	L4/5 IT Glut4	up
Mul1	5.18184	0.591661	0.69107	0.856152	0.391914	0.999959	L4/5 IT Glut4	up
Sema6c	6.63239	0.591593	0.606616	0.975235	0.329444	0.999959	L4/5 IT Glut4	up
Mettl1	4.52475	0.591172	0.752282	0.785839	0.431962	0.999959	L4/5 IT Glut4	up
Cenpt	5.18704	0.59102	0.682766	0.865626	0.386695	0.999959	L4/5 IT Glut4	up
Nxph3	0.313694	0.59096	3.0841	0.191615	0.848044	0.999959	L4/5 IT Glut4	up
Gga3	21.4387	0.590585	0.351694	1.67926	0.0931018	0.999959	L4/5 IT Glut4	up
Ube2t	0.264541	0.590302	3.13037	0.188572	0.850428	0.999959	L4/5 IT Glut4	up
Gpr157	0.264541	0.590302	3.13037	0.188572	0.850428	0.999959	L4/5 IT Glut4	up
Grwd1	1.06085	0.590246	1.65934	0.355711	0.722057	0.999959	L4/5 IT Glut4	up
Gng12	3.25501	0.58981	0.96942	0.608415	0.542912	0.999959	L4/5 IT Glut4	up
1700001P01Rik	0.30617	0.589794	3.09741	0.190415	0.848984	0.999959	L4/5 IT Glut4	up
Pdlim2	0.30617	0.589794	3.09741	0.190415	0.848984	0.999959	L4/5 IT Glut4	up
Gm6525	0.41126	0.589481	2.72608	0.216237	0.828803	0.999959	L4/5 IT Glut4	up
1700030K09Rik	9.40481	0.589444	0.514339	1.14602	0.251786	0.999959	L4/5 IT Glut4	up
2010106E10Rik	0.461611	0.588486	2.66164	0.221099	0.825015	0.999959	L4/5 IT Glut4	up
Tes3-ps	0.420377	0.588456	2.71363	0.216852	0.828324	0.999959	L4/5 IT Glut4	up
Igfbp6	3.79316	0.588359	0.839848	0.700554	0.483581	0.999959	L4/5 IT Glut4	up
Ilvbl	3.61778	0.588223	0.864409	0.680492	0.496193	0.999959	L4/5 IT Glut4	up
Tbx2	0.453128	0.587473	2.31519	0.253747	0.799691	0.999959	L4/5 IT Glut4	up
Hjurp	24.2935	0.587403	0.337812	1.73885	0.0820614	0.999959	L4/5 IT Glut4	up
Zdhhc18	16.0481	0.586879	0.387308	1.51528	0.129702	0.999959	L4/5 IT Glut4	up
Rsph4a	0.276696	0.586873	3.14748	0.186458	0.852086	0.999959	L4/5 IT Glut4	up
Zfp954	2.37664	0.586074	1.07601	0.544671	0.58598	0.999959	L4/5 IT Glut4	up
Habp4	22.5263	0.585833	0.333655	1.75581	0.0791212	0.999959	L4/5 IT Glut4	up
Nsrp1	13.9681	0.585218	0.430998	1.35782	0.174521	0.999959	L4/5 IT Glut4	up
Mroh3	0.0986362	0.58443	3.15618	0.18517	0.853096	0.999959	L4/5 IT Glut4	up
Rgs13	0.0986362	0.58443	3.15618	0.18517	0.853096	0.999959	L4/5 IT Glut4	up
Myoc	0.0986362	0.58443	3.15618	0.18517	0.853096	0.999959	L4/5 IT Glut4	up
Fmo4	0.0986362	0.58443	3.15618	0.18517	0.853096	0.999959	L4/5 IT Glut4	up
Nuf2	0.0986362	0.58443	3.15618	0.18517	0.853096	0.999959	L4/5 IT Glut4	up
Il2ra	0.0986362	0.58443	3.15618	0.18517	0.853096	0.999959	L4/5 IT Glut4	up
4932414N04Rik	0.0986362	0.58443	3.15618	0.18517	0.853096	0.999959	L4/5 IT Glut4	up
Gm26558	0.0986362	0.58443	3.15618	0.18517	0.853096	0.999959	L4/5 IT Glut4	up
Aplnr	0.0986362	0.58443	3.15618	0.18517	0.853096	0.999959	L4/5 IT Glut4	up
Spi1	0.0986362	0.58443	3.15618	0.18517	0.853096	0.999959	L4/5 IT Glut4	up
4930430A15Rik	0.0986362	0.58443	3.15618	0.18517	0.853096	0.999959	L4/5 IT Glut4	up
Plcb2	0.0986362	0.58443	3.15618	0.18517	0.853096	0.999959	L4/5 IT Glut4	up
Sptlc3	0.0986362	0.58443	3.15618	0.18517	0.853096	0.999959	L4/5 IT Glut4	up
Bpifb1	0.0986362	0.58443	3.15618	0.18517	0.853096	0.999959	L4/5 IT Glut4	up
P2ry1	0.0986362	0.58443	3.15618	0.18517	0.853096	0.999959	L4/5 IT Glut4	up
Crabp2	0.0986362	0.58443	3.15618	0.18517	0.853096	0.999959	L4/5 IT Glut4	up
Nes	0.0986362	0.58443	3.15618	0.18517	0.853096	0.999959	L4/5 IT Glut4	up
Efna4	0.0986362	0.58443	3.15618	0.18517	0.853096	0.999959	L4/5 IT Glut4	up
Chil6	0.0986362	0.58443	3.15618	0.18517	0.853096	0.999959	L4/5 IT Glut4	up
Gstm7	0.0986362	0.58443	3.15618	0.18517	0.853096	0.999959	L4/5 IT Glut4	up
Enpep	0.0986362	0.58443	3.15618	0.18517	0.853096	0.999959	L4/5 IT Glut4	up
Ifi44	0.0986362	0.58443	3.15618	0.18517	0.853096	0.999959	L4/5 IT Glut4	up
Olfr70	0.0986362	0.58443	3.15618	0.18517	0.853096	0.999959	L4/5 IT Glut4	up
Tlr4	0.0986362	0.58443	3.15618	0.18517	0.853096	0.999959	L4/5 IT Glut4	up
Ube2u	0.0986362	0.58443	3.15618	0.18517	0.853096	0.999959	L4/5 IT Glut4	up
Lexm	0.0986362	0.58443	3.15618	0.18517	0.853096	0.999959	L4/5 IT Glut4	up
Cdkn2c	0.0986362	0.58443	3.15618	0.18517	0.853096	0.999959	L4/5 IT Glut4	up
Tmem269	0.0986362	0.58443	3.15618	0.18517	0.853096	0.999959	L4/5 IT Glut4	up
Themis2	0.0986362	0.58443	3.15618	0.18517	0.853096	0.999959	L4/5 IT Glut4	up
Hspb7	0.0986362	0.58443	3.15618	0.18517	0.853096	0.999959	L4/5 IT Glut4	up
Wdr86	0.0986362	0.58443	3.15618	0.18517	0.853096	0.999959	L4/5 IT Glut4	up
Txk	0.0986362	0.58443	3.15618	0.18517	0.853096	0.999959	L4/5 IT Glut4	up
Tmem119	0.0986362	0.58443	3.15618	0.18517	0.853096	0.999959	L4/5 IT Glut4	up
Oasl1	0.0986362	0.58443	3.15618	0.18517	0.853096	0.999959	L4/5 IT Glut4	up
Sdsl	0.0986362	0.58443	3.15618	0.18517	0.853096	0.999959	L4/5 IT Glut4	up
Mlxipl	0.0986362	0.58443	3.15618	0.18517	0.853096	0.999959	L4/5 IT Glut4	up
Upk3bl	0.0986362	0.58443	3.15618	0.18517	0.853096	0.999959	L4/5 IT Glut4	up
Pcolce	0.0986362	0.58443	3.15618	0.18517	0.853096	0.999959	L4/5 IT Glut4	up
Card11	0.0986362	0.58443	3.15618	0.18517	0.853096	0.999959	L4/5 IT Glut4	up
Gng11	0.0986362	0.58443	3.15618	0.18517	0.853096	0.999959	L4/5 IT Glut4	up
Vmn1r22	0.0986362	0.58443	3.15618	0.18517	0.853096	0.999959	L4/5 IT Glut4	up
Nat8f4	0.0986362	0.58443	3.15618	0.18517	0.853096	0.999959	L4/5 IT Glut4	up
Gm36210	0.0986362	0.58443	3.15618	0.18517	0.853096	0.999959	L4/5 IT Glut4	up
Sbk2	0.0986362	0.58443	3.15618	0.18517	0.853096	0.999959	L4/5 IT Glut4	up
Cyp2b13	0.0986362	0.58443	3.15618	0.18517	0.853096	0.999959	L4/5 IT Glut4	up
Hcst	0.0986362	0.58443	3.15618	0.18517	0.853096	0.999959	L4/5 IT Glut4	up
Zfp473	0.0986362	0.58443	3.15618	0.18517	0.853096	0.999959	L4/5 IT Glut4	up
Gfy	0.0986362	0.58443	3.15618	0.18517	0.853096	0.999959	L4/5 IT Glut4	up
Olfr556	0.0986362	0.58443	3.15618	0.18517	0.853096	0.999959	L4/5 IT Glut4	up
Abca14	0.0986362	0.58443	3.15618	0.18517	0.853096	0.999959	L4/5 IT Glut4	up
Ifitm1	0.0986362	0.58443	3.15618	0.18517	0.853096	0.999959	L4/5 IT Glut4	up
Crlf1	0.0986362	0.58443	3.15618	0.18517	0.853096	0.999959	L4/5 IT Glut4	up
Gm10643	0.0986362	0.58443	3.15618	0.18517	0.853096	0.999959	L4/5 IT Glut4	up
Ces2b	0.0986362	0.58443	3.15618	0.18517	0.853096	0.999959	L4/5 IT Glut4	up
Crispld2	0.0986362	0.58443	3.15618	0.18517	0.853096	0.999959	L4/5 IT Glut4	up
S1pr2	0.0986362	0.58443	3.15618	0.18517	0.853096	0.999959	L4/5 IT Glut4	up
Adamts15	0.0986362	0.58443	3.15618	0.18517	0.853096	0.999959	L4/5 IT Glut4	up
Foxr1	0.0986362	0.58443	3.15618	0.18517	0.853096	0.999959	L4/5 IT Glut4	up
Plekho2	0.0986362	0.58443	3.15618	0.18517	0.853096	0.999959	L4/5 IT Glut4	up
Fbxw27	0.0986362	0.58443	3.15618	0.18517	0.853096	0.999959	L4/5 IT Glut4	up
Eomes	0.0986362	0.58443	3.15618	0.18517	0.853096	0.999959	L4/5 IT Glut4	up
Tmem26	0.0986362	0.58443	3.15618	0.18517	0.853096	0.999959	L4/5 IT Glut4	up
Odf3l2	0.0986362	0.58443	3.15618	0.18517	0.853096	0.999959	L4/5 IT Glut4	up
Arhgap45	0.0986362	0.58443	3.15618	0.18517	0.853096	0.999959	L4/5 IT Glut4	up
Slc17a8	0.0986362	0.58443	3.15618	0.18517	0.853096	0.999959	L4/5 IT Glut4	up
Cyp27b1	0.0986362	0.58443	3.15618	0.18517	0.853096	0.999959	L4/5 IT Glut4	up
Myh3	0.0986362	0.58443	3.15618	0.18517	0.853096	0.999959	L4/5 IT Glut4	up
Pik3r5	0.0986362	0.58443	3.15618	0.18517	0.853096	0.999959	L4/5 IT Glut4	up
Fgf11	0.0986362	0.58443	3.15618	0.18517	0.853096	0.999959	L4/5 IT Glut4	up
Nlrp1b	0.0986362	0.58443	3.15618	0.18517	0.853096	0.999959	L4/5 IT Glut4	up
Abi3	0.0986362	0.58443	3.15618	0.18517	0.853096	0.999959	L4/5 IT Glut4	up
Wnk4	0.0986362	0.58443	3.15618	0.18517	0.853096	0.999959	L4/5 IT Glut4	up
Cacng5	0.0986362	0.58443	3.15618	0.18517	0.853096	0.999959	L4/5 IT Glut4	up
Mboat1	0.0986362	0.58443	3.15618	0.18517	0.853096	0.999959	L4/5 IT Glut4	up
Serpinb6c	0.0986362	0.58443	3.15618	0.18517	0.853096	0.999959	L4/5 IT Glut4	up
Ly86	0.0986362	0.58443	3.15618	0.18517	0.853096	0.999959	L4/5 IT Glut4	up
Edn1	0.0986362	0.58443	3.15618	0.18517	0.853096	0.999959	L4/5 IT Glut4	up
Gm3164	0.0986362	0.58443	3.15618	0.18517	0.853096	0.999959	L4/5 IT Glut4	up
Duxbl1	0.0986362	0.58443	3.15618	0.18517	0.853096	0.999959	L4/5 IT Glut4	up
Stab1	0.0986362	0.58443	3.15618	0.18517	0.853096	0.999959	L4/5 IT Glut4	up
Gm7247	0.0986362	0.58443	3.15618	0.18517	0.853096	0.999959	L4/5 IT Glut4	up
Prss55	0.0986362	0.58443	3.15618	0.18517	0.853096	0.999959	L4/5 IT Glut4	up
Erich6b	0.0986362	0.58443	3.15618	0.18517	0.853096	0.999959	L4/5 IT Glut4	up
Dct	0.0986362	0.58443	3.15618	0.18517	0.853096	0.999959	L4/5 IT Glut4	up
Mroh4	0.0986362	0.58443	3.15618	0.18517	0.853096	0.999959	L4/5 IT Glut4	up
Naprt	0.0986362	0.58443	3.15618	0.18517	0.853096	0.999959	L4/5 IT Glut4	up
Tnfrsf13c	0.0986362	0.58443	3.15618	0.18517	0.853096	0.999959	L4/5 IT Glut4	up
Smagp	0.0986362	0.58443	3.15618	0.18517	0.853096	0.999959	L4/5 IT Glut4	up
Krt7	0.0986362	0.58443	3.15618	0.18517	0.853096	0.999959	L4/5 IT Glut4	up
Gpr84	0.0986362	0.58443	3.15618	0.18517	0.853096	0.999959	L4/5 IT Glut4	up
Kng2	0.0986362	0.58443	3.15618	0.18517	0.853096	0.999959	L4/5 IT Glut4	up
Myh15	0.0986362	0.58443	3.15618	0.18517	0.853096	0.999959	L4/5 IT Glut4	up
Kcne2	0.0986362	0.58443	3.15618	0.18517	0.853096	0.999959	L4/5 IT Glut4	up
Sytl3	0.0986362	0.58443	3.15618	0.18517	0.853096	0.999959	L4/5 IT Glut4	up
Gm17087	0.0986362	0.58443	3.15618	0.18517	0.853096	0.999959	L4/5 IT Glut4	up
Ccdc154	0.0986362	0.58443	3.15618	0.18517	0.853096	0.999959	L4/5 IT Glut4	up
Actl9	0.0986362	0.58443	3.15618	0.18517	0.853096	0.999959	L4/5 IT Glut4	up
Tcf19	0.0986362	0.58443	3.15618	0.18517	0.853096	0.999959	L4/5 IT Glut4	up
Psors1c2	0.0986362	0.58443	3.15618	0.18517	0.853096	0.999959	L4/5 IT Glut4	up
B430306N03Rik	0.0986362	0.58443	3.15618	0.18517	0.853096	0.999959	L4/5 IT Glut4	up
Uhrf1	0.0986362	0.58443	3.15618	0.18517	0.853096	0.999959	L4/5 IT Glut4	up
Six2	0.0986362	0.58443	3.15618	0.18517	0.853096	0.999959	L4/5 IT Glut4	up
Tnfaip8	0.0986362	0.58443	3.15618	0.18517	0.853096	0.999959	L4/5 IT Glut4	up
Olfr1437	0.0986362	0.58443	3.15618	0.18517	0.853096	0.999959	L4/5 IT Glut4	up
Anxa1	0.0986362	0.58443	3.15618	0.18517	0.853096	0.999959	L4/5 IT Glut4	up
Tmc1	0.0986362	0.58443	3.15618	0.18517	0.853096	0.999959	L4/5 IT Glut4	up
1700019N19Rik	0.0986362	0.58443	3.15618	0.18517	0.853096	0.999959	L4/5 IT Glut4	up
Hsf3	0.0986362	0.58443	3.15618	0.18517	0.853096	0.999959	L4/5 IT Glut4	up
Magee2	0.0986362	0.58443	3.15618	0.18517	0.853096	0.999959	L4/5 IT Glut4	up
Lpar4	0.0986362	0.58443	3.15618	0.18517	0.853096	0.999959	L4/5 IT Glut4	up
Kir3dl2	0.0986362	0.58443	3.15618	0.18517	0.853096	0.999959	L4/5 IT Glut4	up
Tmsb15b1	0.0986362	0.58443	3.15618	0.18517	0.853096	0.999959	L4/5 IT Glut4	up
Adgrg2	0.0986362	0.58443	3.15618	0.18517	0.853096	0.999959	L4/5 IT Glut4	up
CT868723.1	0.0986362	0.58443	3.15618	0.18517	0.853096	0.999959	L4/5 IT Glut4	up
Camkk1	26.2407	0.584	0.353909	1.65014	0.0989146	0.999959	L4/5 IT Glut4	up
Uqcr10	4.1195	0.58346504840259406	0.981233	0.594624	0.552095	0.999959	L4/5 IT Glut4	up
Sdc4	0.642064	0.583075	2.00972	0.290127	0.771719	0.999959	L4/5 IT Glut4	up
Cst7	0.249612	0.583073	3.14315	0.185506	0.852832	0.999959	L4/5 IT Glut4	up
Arap3	0.249612	0.583073	3.14315	0.185506	0.852832	0.999959	L4/5 IT Glut4	up
Mss51	3.49737	0.583016	0.842368	0.692116	0.488865	0.999959	L4/5 IT Glut4	up
Arf2	6.78993	0.582843	0.618575	0.942235	0.346072	0.999959	L4/5 IT Glut4	up
Llgl1	8.11634	0.582686	0.573373	1.01624	0.309514	0.999959	L4/5 IT Glut4	up
Psma6	7.43394	0.582592	0.605829	0.961644	0.336228	0.999959	L4/5 IT Glut4	up
Lhx4	0.302152	0.582287	3.10933	0.187271	0.851448	0.999959	L4/5 IT Glut4	up
Car12	1.7043	0.5817	1.16565	0.499036	0.617754	0.999959	L4/5 IT Glut4	up
Egfr	1.10671	0.581219	1.65458	0.351278	0.72538	0.999959	L4/5 IT Glut4	up
Mfap1a	11.1471	0.581179	0.48719	1.19292	0.232901	0.999959	L4/5 IT Glut4	up
Efnb3	0.491924	0.580587	2.58547	0.224558	0.822323	0.999959	L4/5 IT Glut4	up
Pdyn	0.212613	0.580044	3.14641	0.184351	0.853738	0.999959	L4/5 IT Glut4	up
Gm16253	0.212613	0.580044	3.14641	0.184351	0.853738	0.999959	L4/5 IT Glut4	up
Vcam1	0.212613	0.580044	3.14641	0.184351	0.853738	0.999959	L4/5 IT Glut4	up
Zc3h12a	0.212613	0.580044	3.14641	0.184351	0.853738	0.999959	L4/5 IT Glut4	up
Bco1	0.212613	0.580044	3.14641	0.184351	0.853738	0.999959	L4/5 IT Glut4	up
Adamts1	0.212613	0.580044	3.14641	0.184351	0.853738	0.999959	L4/5 IT Glut4	up
Cabp4	0.212613	0.580044	3.14641	0.184351	0.853738	0.999959	L4/5 IT Glut4	up
Pop4	2.63636	0.579917	1.04971	0.552457	0.580636	0.999959	L4/5 IT Glut4	up
Vwa5a	0.655447	0.579888	2.14647	0.270159	0.787038	0.999959	L4/5 IT Glut4	up
Chchd1	7.11136	0.57961	0.616354	0.940385	0.34702	0.999959	L4/5 IT Glut4	up
Cpne2	0.438548	0.578766	2.32178	0.249277	0.803146	0.999959	L4/5 IT Glut4	up
Gm765	3.06753	0.578759	1.01127	0.57231	0.567112	0.999959	L4/5 IT Glut4	up
Xrcc2	1.78479	0.5787	1.1919	0.485529	0.627301	0.999959	L4/5 IT Glut4	up
Mrps26	8.79851	0.578509	0.572691	1.01016	0.31242	0.999959	L4/5 IT Glut4	up
Ccdc190	0.282552	0.577968	3.12804	0.18477	0.853409	0.999959	L4/5 IT Glut4	up
Cspg4	0.282552	0.577968	3.12804	0.18477	0.853409	0.999959	L4/5 IT Glut4	up
Olfr323	0.282552	0.577968	3.12804	0.18477	0.853409	0.999959	L4/5 IT Glut4	up
Bcl2l15	1.33813	0.577207	1.31258	0.439751	0.660118	0.999959	L4/5 IT Glut4	up
Sat1	4.92928	0.577005	0.747961	0.771437	0.440448	0.999959	L4/5 IT Glut4	up
Mamdc2	65.4261	0.576768	0.212193	2.71813	0.00656529	0.999959	L4/5 IT Glut4	up
Dynlt1f	2.69171	0.576371	1.05379	0.546952	0.584412	0.999959	L4/5 IT Glut4	up
Etv3	12.5765	0.574757	0.455456	1.26194	0.206971	0.999959	L4/5 IT Glut4	up
Ier5	11.8028	0.574756	0.47886	1.20026	0.230039	0.999959	L4/5 IT Glut4	up
Fgf23	0.23807	0.574636	3.12539	0.183861	0.854123	0.999959	L4/5 IT Glut4	up
Mrgpra2b	0.23807	0.574636	3.12539	0.183861	0.854123	0.999959	L4/5 IT Glut4	up
Mcm5	0.23807	0.574636	3.12539	0.183861	0.854123	0.999959	L4/5 IT Glut4	up
Nrl	0.23807	0.574636	3.12539	0.183861	0.854123	0.999959	L4/5 IT Glut4	up
Tgm1	0.23807	0.574636	3.12539	0.183861	0.854123	0.999959	L4/5 IT Glut4	up
Ms4a8a	0.23807	0.574636	3.12539	0.183861	0.854123	0.999959	L4/5 IT Glut4	up
Foxp4	5.06086	0.574214	0.685147	0.838088	0.401981	0.999959	L4/5 IT Glut4	up
Efhd1	0.265358	0.574169	3.12847	0.18353	0.854382	0.999959	L4/5 IT Glut4	up
Mmp15	0.265358	0.574169	3.12847	0.18353	0.854382	0.999959	L4/5 IT Glut4	up
Trhr	0.265358	0.574169	3.12847	0.18353	0.854382	0.999959	L4/5 IT Glut4	up
Hey2	0.413092	0.574009	2.3933	0.239839	0.810455	0.999959	L4/5 IT Glut4	up
Syce2	0.569515	0.573565	2.11762	0.270854	0.786503	0.999959	L4/5 IT Glut4	up
Arg1	0.277512	0.57211	3.14554	0.18188	0.855677	0.999959	L4/5 IT Glut4	up
Tpm3-rs7	0.277512	0.57211	3.14554	0.18188	0.855677	0.999959	L4/5 IT Glut4	up
Rmi2	0.277512	0.57211	3.14554	0.18188	0.855677	0.999959	L4/5 IT Glut4	up
Msantd1	1.60744	0.571894	1.32902	0.430314	0.666968	0.999959	L4/5 IT Glut4	up
Dnajb3	0.128962	0.571807	3.15451	0.181267	0.856158	0.999959	L4/5 IT Glut4	up
Tfcp2l1	0.128962	0.571807	3.15451	0.181267	0.856158	0.999959	L4/5 IT Glut4	up
Optc	0.128962	0.571807	3.15451	0.181267	0.856158	0.999959	L4/5 IT Glut4	up
Fmo2	0.128962	0.571807	3.15451	0.181267	0.856158	0.999959	L4/5 IT Glut4	up
Cytip	0.128962	0.571807	3.15451	0.181267	0.856158	0.999959	L4/5 IT Glut4	up
Rpusd2	0.128962	0.571807	3.15451	0.181267	0.856158	0.999959	L4/5 IT Glut4	up
Zfp967	0.128962	0.571807	3.15451	0.181267	0.856158	0.999959	L4/5 IT Glut4	up
Fcgr1	0.128962	0.571807	3.15451	0.181267	0.856158	0.999959	L4/5 IT Glut4	up
Olfr266	0.128962	0.571807	3.15451	0.181267	0.856158	0.999959	L4/5 IT Glut4	up
Gbp5	0.128962	0.571807	3.15451	0.181267	0.856158	0.999959	L4/5 IT Glut4	up
Acnat1	0.128962	0.571807	3.15451	0.181267	0.856158	0.999959	L4/5 IT Glut4	up
Rbp7	0.128962	0.571807	3.15451	0.181267	0.856158	0.999959	L4/5 IT Glut4	up
Tbx3	0.128962	0.571807	3.15451	0.181267	0.856158	0.999959	L4/5 IT Glut4	up
Eln	0.128962	0.571807	3.15451	0.181267	0.856158	0.999959	L4/5 IT Glut4	up
Cldn15	0.128962	0.571807	3.15451	0.181267	0.856158	0.999959	L4/5 IT Glut4	up
Pdk4	0.128962	0.571807	3.15451	0.181267	0.856158	0.999959	L4/5 IT Glut4	up
Tac1	0.128962	0.571807	3.15451	0.181267	0.856158	0.999959	L4/5 IT Glut4	up
Vmn2r27	0.128962	0.571807	3.15451	0.181267	0.856158	0.999959	L4/5 IT Glut4	up
Vwf	0.128962	0.571807	3.15451	0.181267	0.856158	0.999959	L4/5 IT Glut4	up
Klrb1c	0.128962	0.571807	3.15451	0.181267	0.856158	0.999959	L4/5 IT Glut4	up
Cacng6	0.128962	0.571807	3.15451	0.181267	0.856158	0.999959	L4/5 IT Glut4	up
Slc7a10	0.128962	0.571807	3.15451	0.181267	0.856158	0.999959	L4/5 IT Glut4	up
Magel2	0.128962	0.571807	3.15451	0.181267	0.856158	0.999959	L4/5 IT Glut4	up
Rlbp1	0.128962	0.571807	3.15451	0.181267	0.856158	0.999959	L4/5 IT Glut4	up
Ticrr	0.128962	0.571807	3.15451	0.181267	0.856158	0.999959	L4/5 IT Glut4	up
Wdr93	0.128962	0.571807	3.15451	0.181267	0.856158	0.999959	L4/5 IT Glut4	up
Chrdl2	0.128962	0.571807	3.15451	0.181267	0.856158	0.999959	L4/5 IT Glut4	up
Acsm5	0.128962	0.571807	3.15451	0.181267	0.856158	0.999959	L4/5 IT Glut4	up
Itgam	0.128962	0.571807	3.15451	0.181267	0.856158	0.999959	L4/5 IT Glut4	up
Drd4	0.128962	0.571807	3.15451	0.181267	0.856158	0.999959	L4/5 IT Glut4	up
Clec4g	0.128962	0.571807	3.15451	0.181267	0.856158	0.999959	L4/5 IT Glut4	up
Chrna6	0.128962	0.571807	3.15451	0.181267	0.856158	0.999959	L4/5 IT Glut4	up
Ccdc153	0.128962	0.571807	3.15451	0.181267	0.856158	0.999959	L4/5 IT Glut4	up
Tent5a	0.128962	0.571807	3.15451	0.181267	0.856158	0.999959	L4/5 IT Glut4	up
Popdc3	0.128962	0.571807	3.15451	0.181267	0.856158	0.999959	L4/5 IT Glut4	up
Lyz2	0.128962	0.571807	3.15451	0.181267	0.856158	0.999959	L4/5 IT Glut4	up
Rdh16	0.128962	0.571807	3.15451	0.181267	0.856158	0.999959	L4/5 IT Glut4	up
4921536K21Rik	0.128962	0.571807	3.15451	0.181267	0.856158	0.999959	L4/5 IT Glut4	up
Abca13	0.128962	0.571807	3.15451	0.181267	0.856158	0.999959	L4/5 IT Glut4	up
Gm12185	0.128962	0.571807	3.15451	0.181267	0.856158	0.999959	L4/5 IT Glut4	up
9930111J21Rik2	0.128962	0.571807	3.15451	0.181267	0.856158	0.999959	L4/5 IT Glut4	up
Trp53i13	0.128962	0.571807	3.15451	0.181267	0.856158	0.999959	L4/5 IT Glut4	up
Zbtb42	0.128962	0.571807	3.15451	0.181267	0.856158	0.999959	L4/5 IT Glut4	up
Trip13	0.128962	0.571807	3.15451	0.181267	0.856158	0.999959	L4/5 IT Glut4	up
Ankrd55	0.128962	0.571807	3.15451	0.181267	0.856158	0.999959	L4/5 IT Glut4	up
Def6	0.128962	0.571807	3.15451	0.181267	0.856158	0.999959	L4/5 IT Glut4	up
Gm16181	0.128962	0.571807	3.15451	0.181267	0.856158	0.999959	L4/5 IT Glut4	up
E230025N22Rik	0.128962	0.571807	3.15451	0.181267	0.856158	0.999959	L4/5 IT Glut4	up
Piezo2	0.128962	0.571807	3.15451	0.181267	0.856158	0.999959	L4/5 IT Glut4	up
AU022751	0.128962	0.571807	3.15451	0.181267	0.856158	0.999959	L4/5 IT Glut4	up
Nxf3	0.128962	0.571807	3.15451	0.181267	0.856158	0.999959	L4/5 IT Glut4	up
A1cf	0.128962	0.571807	3.15451	0.181267	0.856158	0.999959	L4/5 IT Glut4	up
Tcfl5	0.361952	0.571386	2.9213	0.195593	0.844929	0.999959	L4/5 IT Glut4	up
Amer1	3.53276	0.57137	0.808629	0.70659	0.479821	0.999959	L4/5 IT Glut4	up
Parp9	1.45162	0.571282	1.2791	0.446629	0.655143	0.999959	L4/5 IT Glut4	up
Ift20	25.3941	0.570455	0.335035	1.70268	0.0886286	0.999959	L4/5 IT Glut4	up
Maf	7.61585	0.569757	0.626486	0.909448	0.363114	0.999959	L4/5 IT Glut4	up
Mars	4.17998	0.569744	0.792863	0.718591	0.472393	0.999959	L4/5 IT Glut4	up
Vmn2r54	0.527885	0.569735	2.17561	0.261874	0.793418	0.999959	L4/5 IT Glut4	up
Pgs1	13.3512	0.569396	0.448126	1.27062	0.203865	0.999959	L4/5 IT Glut4	up
Nnmt	0.279937	0.568905	3.14177	0.181078	0.856307	0.999959	L4/5 IT Glut4	up
Pcdha7	0.279937	0.568905	3.14177	0.181078	0.856307	0.999959	L4/5 IT Glut4	up
Rnh1	8.41777	0.56879	0.602506	0.94404	0.345149	0.999959	L4/5 IT Glut4	up
Arl6ip6	5.91859	0.568355	0.632427	0.898689	0.368818	0.999959	L4/5 IT Glut4	up
4921539E11Rik	0.431263	0.567795	2.68415	0.211536	0.832469	0.999959	L4/5 IT Glut4	up
Slc25a35	1.23406	0.567161	1.37816	0.411535	0.68068	0.999959	L4/5 IT Glut4	up
Igfbp4	2.23241	0.567037	1.18756	0.47748	0.633021	0.999959	L4/5 IT Glut4	up
Smyd5	8.59476	0.566885	0.544341	1.04142	0.297683	0.999959	L4/5 IT Glut4	up
Baalc	17.0596	0.566474	0.387576	1.46158	0.143856	0.999959	L4/5 IT Glut4	up
Elp3	21.8227	0.56632	0.342042	1.6557	0.0977823	0.999959	L4/5 IT Glut4	up
Cenpq	2.70181	0.565886	0.997814	0.567126	0.570629	0.999959	L4/5 IT Glut4	up
Lrig3	0.312878	0.565404	3.06606	0.184408	0.853694	0.999959	L4/5 IT Glut4	up
Adamts2	0.312878	0.565404	3.06606	0.184408	0.853694	0.999959	L4/5 IT Glut4	up
Ninj1	0.312878	0.565404	3.06606	0.184408	0.853694	0.999959	L4/5 IT Glut4	up
Olfr731	0.312878	0.565404	3.06606	0.184408	0.853694	0.999959	L4/5 IT Glut4	up
Stap2	0.312878	0.565404	3.06606	0.184408	0.853694	0.999959	L4/5 IT Glut4	up
Cd160	0.21343	0.565197	3.14447	0.179743	0.857354	0.999959	L4/5 IT Glut4	up
Thbs4	0.21343	0.565197	3.14447	0.179743	0.857354	0.999959	L4/5 IT Glut4	up
Sox17	0.0648792	0.564267	3.15342	0.178938	0.857987	0.999959	L4/5 IT Glut4	up
Stk17b	0.0648792	0.564267	3.15342	0.178938	0.857987	0.999959	L4/5 IT Glut4	up
Vil1	0.0648792	0.564267	3.15342	0.178938	0.857987	0.999959	L4/5 IT Glut4	up
Gpr55	0.0648792	0.564267	3.15342	0.178938	0.857987	0.999959	L4/5 IT Glut4	up
Ctse	0.0648792	0.564267	3.15342	0.178938	0.857987	0.999959	L4/5 IT Glut4	up
Tnni1	0.0648792	0.564267	3.15342	0.178938	0.857987	0.999959	L4/5 IT Glut4	up
Inava	0.0648792	0.564267	3.15342	0.178938	0.857987	0.999959	L4/5 IT Glut4	up
Mr1	0.0648792	0.564267	3.15342	0.178938	0.857987	0.999959	L4/5 IT Glut4	up
Tex35	0.0648792	0.564267	3.15342	0.178938	0.857987	0.999959	L4/5 IT Glut4	up
Tor4a	0.0648792	0.564267	3.15342	0.178938	0.857987	0.999959	L4/5 IT Glut4	up
Ccdc187	0.0648792	0.564267	3.15342	0.178938	0.857987	0.999959	L4/5 IT Glut4	up
Ly75	0.0648792	0.564267	3.15342	0.178938	0.857987	0.999959	L4/5 IT Glut4	up
Olfr1156	0.0648792	0.564267	3.15342	0.178938	0.857987	0.999959	L4/5 IT Glut4	up
Bmf	0.0648792	0.564267	3.15342	0.178938	0.857987	0.999959	L4/5 IT Glut4	up
Tmem239	0.0648792	0.564267	3.15342	0.178938	0.857987	0.999959	L4/5 IT Glut4	up
Sstr4	0.0648792	0.564267	3.15342	0.178938	0.857987	0.999959	L4/5 IT Glut4	up
Vsx1	0.0648792	0.564267	3.15342	0.178938	0.857987	0.999959	L4/5 IT Glut4	up
Tcf15	0.0648792	0.564267	3.15342	0.178938	0.857987	0.999959	L4/5 IT Glut4	up
Lpin3	0.0648792	0.564267	3.15342	0.178938	0.857987	0.999959	L4/5 IT Glut4	up
Tnfsf10	0.0648792	0.564267	3.15342	0.178938	0.857987	0.999959	L4/5 IT Glut4	up
Vmn2r3	0.0648792	0.564267	3.15342	0.178938	0.857987	0.999959	L4/5 IT Glut4	up
Hrnr	0.0648792	0.564267	3.15342	0.178938	0.857987	0.999959	L4/5 IT Glut4	up
Txnip	0.0648792	0.564267	3.15342	0.178938	0.857987	0.999959	L4/5 IT Glut4	up
Chil3	0.0648792	0.564267	3.15342	0.178938	0.857987	0.999959	L4/5 IT Glut4	up
Gbp3	0.0648792	0.564267	3.15342	0.178938	0.857987	0.999959	L4/5 IT Glut4	up
Aldh1b1	0.0648792	0.564267	3.15342	0.178938	0.857987	0.999959	L4/5 IT Glut4	up
Cdc20	0.0648792	0.564267	3.15342	0.178938	0.857987	0.999959	L4/5 IT Glut4	up
Mycl	0.0648792	0.564267	3.15342	0.178938	0.857987	0.999959	L4/5 IT Glut4	up
Fhl3	0.0648792	0.564267	3.15342	0.178938	0.857987	0.999959	L4/5 IT Glut4	up
CK137956	0.0648792	0.564267	3.15342	0.178938	0.857987	0.999959	L4/5 IT Glut4	up
Tinagl1	0.0648792	0.564267	3.15342	0.178938	0.857987	0.999959	L4/5 IT Glut4	up
E2f2	0.0648792	0.564267	3.15342	0.178938	0.857987	0.999959	L4/5 IT Glut4	up
Agmat	0.0648792	0.564267	3.15342	0.178938	0.857987	0.999959	L4/5 IT Glut4	up
Zfp979	0.0648792	0.564267	3.15342	0.178938	0.857987	0.999959	L4/5 IT Glut4	up
Gm572	0.0648792	0.564267	3.15342	0.178938	0.857987	0.999959	L4/5 IT Glut4	up
Tas1r3	0.0648792	0.564267	3.15342	0.178938	0.857987	0.999959	L4/5 IT Glut4	up
9130230L23Rik	0.0648792	0.564267	3.15342	0.178938	0.857987	0.999959	L4/5 IT Glut4	up
Fam47e	0.0648792	0.564267	3.15342	0.178938	0.857987	0.999959	L4/5 IT Glut4	up
Dspp	0.0648792	0.564267	3.15342	0.178938	0.857987	0.999959	L4/5 IT Glut4	up
Stag3	0.0648792	0.564267	3.15342	0.178938	0.857987	0.999959	L4/5 IT Glut4	up
Cpvl	0.0648792	0.564267	3.15342	0.178938	0.857987	0.999959	L4/5 IT Glut4	up
Gadd45a	0.0648792	0.564267	3.15342	0.178938	0.857987	0.999959	L4/5 IT Glut4	up
Ltbr	0.0648792	0.564267	3.15342	0.178938	0.857987	0.999959	L4/5 IT Glut4	up
Klrb1	0.0648792	0.564267	3.15342	0.178938	0.857987	0.999959	L4/5 IT Glut4	up
Klrk1	0.0648792	0.564267	3.15342	0.178938	0.857987	0.999959	L4/5 IT Glut4	up
Cdc42ep5	0.0648792	0.564267	3.15342	0.178938	0.857987	0.999959	L4/5 IT Glut4	up
Vmn2r28	0.0648792	0.564267	3.15342	0.178938	0.857987	0.999959	L4/5 IT Glut4	up
Vmn2r44	0.0648792	0.564267	3.15342	0.178938	0.857987	0.999959	L4/5 IT Glut4	up
C5ar2	0.0648792	0.564267	3.15342	0.178938	0.857987	0.999959	L4/5 IT Glut4	up
9530053A07Rik	0.0648792	0.564267	3.15342	0.178938	0.857987	0.999959	L4/5 IT Glut4	up
Lgals7	0.0648792	0.564267	3.15342	0.178938	0.857987	0.999959	L4/5 IT Glut4	up
Cebpa	0.0648792	0.564267	3.15342	0.178938	0.857987	0.999959	L4/5 IT Glut4	up
Acp4	0.0648792	0.564267	3.15342	0.178938	0.857987	0.999959	L4/5 IT Glut4	up
Lipt2	0.0648792	0.564267	3.15342	0.178938	0.857987	0.999959	L4/5 IT Glut4	up
Trim21	0.0648792	0.564267	3.15342	0.178938	0.857987	0.999959	L4/5 IT Glut4	up
Olfr684	0.0648792	0.564267	3.15342	0.178938	0.857987	0.999959	L4/5 IT Glut4	up
Olfr689	0.0648792	0.564267	3.15342	0.178938	0.857987	0.999959	L4/5 IT Glut4	up
Irf7	0.0648792	0.564267	3.15342	0.178938	0.857987	0.999959	L4/5 IT Glut4	up
Igf2	0.0648792	0.564267	3.15342	0.178938	0.857987	0.999959	L4/5 IT Glut4	up
Ascl2	0.0648792	0.564267	3.15342	0.178938	0.857987	0.999959	L4/5 IT Glut4	up
Mrgpre	0.0648792	0.564267	3.15342	0.178938	0.857987	0.999959	L4/5 IT Glut4	up
Ido1	0.0648792	0.564267	3.15342	0.178938	0.857987	0.999959	L4/5 IT Glut4	up
B3gnt3	0.0648792	0.564267	3.15342	0.178938	0.857987	0.999959	L4/5 IT Glut4	up
Olfr374	0.0648792	0.564267	3.15342	0.178938	0.857987	0.999959	L4/5 IT Glut4	up
Tmed6	0.0648792	0.564267	3.15342	0.178938	0.857987	0.999959	L4/5 IT Glut4	up
Foxc2	0.0648792	0.564267	3.15342	0.178938	0.857987	0.999959	L4/5 IT Glut4	up
Deup1	0.0648792	0.564267	3.15342	0.178938	0.857987	0.999959	L4/5 IT Glut4	up
S1pr5	0.0648792	0.564267	3.15342	0.178938	0.857987	0.999959	L4/5 IT Glut4	up
St14	0.0648792	0.564267	3.15342	0.178938	0.857987	0.999959	L4/5 IT Glut4	up
Olfr881	0.0648792	0.564267	3.15342	0.178938	0.857987	0.999959	L4/5 IT Glut4	up
Pou2f3	0.0648792	0.564267	3.15342	0.178938	0.857987	0.999959	L4/5 IT Glut4	up
Oaf	0.0648792	0.564267	3.15342	0.178938	0.857987	0.999959	L4/5 IT Glut4	up
Drd2	0.0648792	0.564267	3.15342	0.178938	0.857987	0.999959	L4/5 IT Glut4	up
Cyp19a1	0.0648792	0.564267	3.15342	0.178938	0.857987	0.999959	L4/5 IT Glut4	up
Snx33	0.0648792	0.564267	3.15342	0.178938	0.857987	0.999959	L4/5 IT Glut4	up
Bcl2a1b	0.0648792	0.564267	3.15342	0.178938	0.857987	0.999959	L4/5 IT Glut4	up
Glyctk	0.0648792	0.564267	3.15342	0.178938	0.857987	0.999959	L4/5 IT Glut4	up
Mst1	0.0648792	0.564267	3.15342	0.178938	0.857987	0.999959	L4/5 IT Glut4	up
Tmie	0.0648792	0.564267	3.15342	0.178938	0.857987	0.999959	L4/5 IT Glut4	up
Cnksr3	0.0648792	0.564267	3.15342	0.178938	0.857987	0.999959	L4/5 IT Glut4	up
Raet1e	0.0648792	0.564267	3.15342	0.178938	0.857987	0.999959	L4/5 IT Glut4	up
Trappc3l	0.0648792	0.564267	3.15342	0.178938	0.857987	0.999959	L4/5 IT Glut4	up
Nodal	0.0648792	0.564267	3.15342	0.178938	0.857987	0.999959	L4/5 IT Glut4	up
Slc5a8	0.0648792	0.564267	3.15342	0.178938	0.857987	0.999959	L4/5 IT Glut4	up
Amdhd1	0.0648792	0.564267	3.15342	0.178938	0.857987	0.999959	L4/5 IT Glut4	up
Gm10271	0.0648792	0.564267	3.15342	0.178938	0.857987	0.999959	L4/5 IT Glut4	up
Hmmr	0.0648792	0.564267	3.15342	0.178938	0.857987	0.999959	L4/5 IT Glut4	up
Gjc2	0.0648792	0.564267	3.15342	0.178938	0.857987	0.999959	L4/5 IT Glut4	up
Tmem220	0.0648792	0.564267	3.15342	0.178938	0.857987	0.999959	L4/5 IT Glut4	up
Gemin4	0.0648792	0.564267	3.15342	0.178938	0.857987	0.999959	L4/5 IT Glut4	up
Slc46a1	0.0648792	0.564267	3.15342	0.178938	0.857987	0.999959	L4/5 IT Glut4	up
1700125H20Rik	0.0648792	0.564267	3.15342	0.178938	0.857987	0.999959	L4/5 IT Glut4	up
Prr11	0.0648792	0.564267	3.15342	0.178938	0.857987	0.999959	L4/5 IT Glut4	up
Pnmt	0.0648792	0.564267	3.15342	0.178938	0.857987	0.999959	L4/5 IT Glut4	up
Gprc5c	0.0648792	0.564267	3.15342	0.178938	0.857987	0.999959	L4/5 IT Glut4	up
Smim6	0.0648792	0.564267	3.15342	0.178938	0.857987	0.999959	L4/5 IT Glut4	up
Vsx2	0.0648792	0.564267	3.15342	0.178938	0.857987	0.999959	L4/5 IT Glut4	up
Olfr1366	0.0648792	0.564267	3.15342	0.178938	0.857987	0.999959	L4/5 IT Glut4	up
Prss16	0.0648792	0.564267	3.15342	0.178938	0.857987	0.999959	L4/5 IT Glut4	up
Armh2	0.0648792	0.564267	3.15342	0.178938	0.857987	0.999959	L4/5 IT Glut4	up
Agtr1a	0.0648792	0.564267	3.15342	0.178938	0.857987	0.999959	L4/5 IT Glut4	up
Mylk4	0.0648792	0.564267	3.15342	0.178938	0.857987	0.999959	L4/5 IT Glut4	up
Susd3	0.0648792	0.564267	3.15342	0.178938	0.857987	0.999959	L4/5 IT Glut4	up
Hsd17b3	0.0648792	0.564267	3.15342	0.178938	0.857987	0.999959	L4/5 IT Glut4	up
Gm8237	0.0648792	0.564267	3.15342	0.178938	0.857987	0.999959	L4/5 IT Glut4	up
Nid2	0.0648792	0.564267	3.15342	0.178938	0.857987	0.999959	L4/5 IT Glut4	up
Sema3g	0.0648792	0.564267	3.15342	0.178938	0.857987	0.999959	L4/5 IT Glut4	up
Cpb2	0.0648792	0.564267	3.15342	0.178938	0.857987	0.999959	L4/5 IT Glut4	up
Epsti1	0.0648792	0.564267	3.15342	0.178938	0.857987	0.999959	L4/5 IT Glut4	up
Zic2	0.0648792	0.564267	3.15342	0.178938	0.857987	0.999959	L4/5 IT Glut4	up
Adamts12	0.0648792	0.564267	3.15342	0.178938	0.857987	0.999959	L4/5 IT Glut4	up
Apol7b	0.0648792	0.564267	3.15342	0.178938	0.857987	0.999959	L4/5 IT Glut4	up
Pkdrej	0.0648792	0.564267	3.15342	0.178938	0.857987	0.999959	L4/5 IT Glut4	up
Slc38a4	0.0648792	0.564267	3.15342	0.178938	0.857987	0.999959	L4/5 IT Glut4	up
Olfr288	0.0648792	0.564267	3.15342	0.178938	0.857987	0.999959	L4/5 IT Glut4	up
Aqp6	0.0648792	0.564267	3.15342	0.178938	0.857987	0.999959	L4/5 IT Glut4	up
Emp2	0.0648792	0.564267	3.15342	0.178938	0.857987	0.999959	L4/5 IT Glut4	up
Cyp2ab1	0.0648792	0.564267	3.15342	0.178938	0.857987	0.999959	L4/5 IT Glut4	up
Fpr2	0.0648792	0.564267	3.15342	0.178938	0.857987	0.999959	L4/5 IT Glut4	up
Zfp677	0.0648792	0.564267	3.15342	0.178938	0.857987	0.999959	L4/5 IT Glut4	up
H2-M10.2	0.0648792	0.564267	3.15342	0.178938	0.857987	0.999959	L4/5 IT Glut4	up
Plin3	0.0648792	0.564267	3.15342	0.178938	0.857987	0.999959	L4/5 IT Glut4	up
Dennd1c	0.0648792	0.564267	3.15342	0.178938	0.857987	0.999959	L4/5 IT Glut4	up
Pcdhga4	0.0648792	0.564267	3.15342	0.178938	0.857987	0.999959	L4/5 IT Glut4	up
Pcdhga8	0.0648792	0.564267	3.15342	0.178938	0.857987	0.999959	L4/5 IT Glut4	up
Batf2	0.0648792	0.564267	3.15342	0.178938	0.857987	0.999959	L4/5 IT Glut4	up
Zbtb3	0.0648792	0.564267	3.15342	0.178938	0.857987	0.999959	L4/5 IT Glut4	up
1810009A15Rik	0.0648792	0.564267	3.15342	0.178938	0.857987	0.999959	L4/5 IT Glut4	up
Cd5	0.0648792	0.564267	3.15342	0.178938	0.857987	0.999959	L4/5 IT Glut4	up
Ms4a4b	0.0648792	0.564267	3.15342	0.178938	0.857987	0.999959	L4/5 IT Glut4	up
Pyroxd2	0.0648792	0.564267	3.15342	0.178938	0.857987	0.999959	L4/5 IT Glut4	up
Pkd2l1	0.0648792	0.564267	3.15342	0.178938	0.857987	0.999959	L4/5 IT Glut4	up
Awat2	0.0648792	0.564267	3.15342	0.178938	0.857987	0.999959	L4/5 IT Glut4	up
Xkrx	0.0648792	0.564267	3.15342	0.178938	0.857987	0.999959	L4/5 IT Glut4	up
AC132444.6	0.0648792	0.564267	3.15342	0.178938	0.857987	0.999959	L4/5 IT Glut4	up
Qrfp	0.0648792	0.564267	3.15342	0.178938	0.857987	0.999959	L4/5 IT Glut4	up
Apoc4	0.0648792	0.564267	3.15342	0.178938	0.857987	0.999959	L4/5 IT Glut4	up
Gm29776	0.0648792	0.564267	3.15342	0.178938	0.857987	0.999959	L4/5 IT Glut4	up
Glipr1l1	0.0648792	0.564267	3.15342	0.178938	0.857987	0.999959	L4/5 IT Glut4	up
Hist1h1d	0.0648792	0.564267	3.15342	0.178938	0.857987	0.999959	L4/5 IT Glut4	up
Rufy4	0.0648792	0.564267	3.15342	0.178938	0.857987	0.999959	L4/5 IT Glut4	up
Olfr1152	0.0648792	0.564267	3.15342	0.178938	0.857987	0.999959	L4/5 IT Glut4	up
Tmco2	0.0648792	0.564267	3.15342	0.178938	0.857987	0.999959	L4/5 IT Glut4	up
Galntl5	0.0648792	0.564267	3.15342	0.178938	0.857987	0.999959	L4/5 IT Glut4	up
Calcr	0.0648792	0.564267	3.15342	0.178938	0.857987	0.999959	L4/5 IT Glut4	up
Clec2h	0.0648792	0.564267	3.15342	0.178938	0.857987	0.999959	L4/5 IT Glut4	up
E330021D16Rik	0.0648792	0.564267	3.15342	0.178938	0.857987	0.999959	L4/5 IT Glut4	up
Defb37	0.0648792	0.564267	3.15342	0.178938	0.857987	0.999959	L4/5 IT Glut4	up
Olfr869	0.0648792	0.564267	3.15342	0.178938	0.857987	0.999959	L4/5 IT Glut4	up
Tmem171	0.0648792	0.564267	3.15342	0.178938	0.857987	0.999959	L4/5 IT Glut4	up
Vmn2r114	0.0648792	0.564267	3.15342	0.178938	0.857987	0.999959	L4/5 IT Glut4	up
Trim15	0.0648792	0.564267	3.15342	0.178938	0.857987	0.999959	L4/5 IT Glut4	up
Krtap28-10	0.0648792	0.564267	3.15342	0.178938	0.857987	0.999959	L4/5 IT Glut4	up
Prss56	0.0648792	0.564267	3.15342	0.178938	0.857987	0.999959	L4/5 IT Glut4	up
Dnmt3c	0.0648792	0.564267	3.15342	0.178938	0.857987	0.999959	L4/5 IT Glut4	up
Hemgn	0.0648792	0.564267	3.15342	0.178938	0.857987	0.999959	L4/5 IT Glut4	up
Vmn1r5	0.0648792	0.564267	3.15342	0.178938	0.857987	0.999959	L4/5 IT Glut4	up
Vmn1r84	0.0648792	0.564267	3.15342	0.178938	0.857987	0.999959	L4/5 IT Glut4	up
C2cd4a	0.0648792	0.564267	3.15342	0.178938	0.857987	0.999959	L4/5 IT Glut4	up
Fbxw13	0.0648792	0.564267	3.15342	0.178938	0.857987	0.999959	L4/5 IT Glut4	up
Cyp4f39	0.0648792	0.564267	3.15342	0.178938	0.857987	0.999959	L4/5 IT Glut4	up
Cdca5	0.0648792	0.564267	3.15342	0.178938	0.857987	0.999959	L4/5 IT Glut4	up
Phldb2	3.98836	0.563738	0.902225	0.624831	0.532082	0.999959	L4/5 IT Glut4	up
Eid1	18.5768	0.562694	0.384133	1.46484	0.142964	0.999959	L4/5 IT Glut4	up
Rfwd3	17.1999	0.561452	0.38205	1.46958	0.141676	0.999959	L4/5 IT Glut4	up
Chil1	0.295683	0.561384	3.12683	0.179538	0.857515	0.999959	L4/5 IT Glut4	up
Axdnd1	0.295683	0.561384	3.12683	0.179538	0.857515	0.999959	L4/5 IT Glut4	up
Dnah8	0.295683	0.561384	3.12683	0.179538	0.857515	0.999959	L4/5 IT Glut4	up
Bloc1s3	0.36198	0.561257	2.905	0.193203	0.8468	0.999959	L4/5 IT Glut4	up
Ak1	5.76354	0.560842	0.65087	0.861681	0.388863	0.999959	L4/5 IT Glut4	up
Pi16	0.337313	0.560668	2.97675	0.188349	0.850603	0.999959	L4/5 IT Glut4	up
Ndufc1	4.42489	0.560284	0.800653	0.699784	0.484062	0.999959	L4/5 IT Glut4	up
Serinc4	0.577039	0.559802	2.14114	0.261451	0.793745	0.999959	L4/5 IT Glut4	up
Commd2	4.87234	0.559793	0.735497	0.761108	0.446593	0.999959	L4/5 IT Glut4	up
Ccna1	0.29787	0.559424	3.13437	0.178481	0.858345	0.999959	L4/5 IT Glut4	up
Gm10775	0.29787	0.559424	3.13437	0.178481	0.858345	0.999959	L4/5 IT Glut4	up
Cyb5r1	0.884607	0.558484	1.68472	0.3315	0.740267	0.999959	L4/5 IT Glut4	up
Rbm11	2.09791	0.558458	1.15429	0.483812	0.628519	0.999959	L4/5 IT Glut4	up
Cubn	1.01165	0.558169	1.65705	0.336845	0.736233	0.999959	L4/5 IT Glut4	up
Znrd1as	0.64349	0.5581	2.20464	0.253148	0.800153	0.999959	L4/5 IT Glut4	up
Wdr49	0.248795	0.558044	3.12535	0.178554	0.858288	0.999959	L4/5 IT Glut4	up
Ptgr1	0.248795	0.558044	3.12535	0.178554	0.858288	0.999959	L4/5 IT Glut4	up
Myl6b	0.248795	0.558044	3.12535	0.178554	0.858288	0.999959	L4/5 IT Glut4	up
Trp63	0.248795	0.558044	3.12535	0.178554	0.858288	0.999959	L4/5 IT Glut4	up
Gna14	0.248795	0.558044	3.12535	0.178554	0.858288	0.999959	L4/5 IT Glut4	up
Fgf5	6.61784	0.557545	0.639619	0.871682	0.383382	0.999959	L4/5 IT Glut4	up
Ccdc137	4.67308	0.557488	0.724666	0.769304	0.441713	0.999959	L4/5 IT Glut4	up
Tmprss11d	0.64273	0.557237	2.03785	0.273443	0.784512	0.999959	L4/5 IT Glut4	up
Zfp142	11.8467	0.557011	0.454471	1.22563	0.220339	0.999959	L4/5 IT Glut4	up
Grhl1	11.1587	0.556923	0.476891	1.16782	0.242878	0.999959	L4/5 IT Glut4	up
Ppan	5.21943	0.556358	0.704142	0.790121	0.429457	0.999959	L4/5 IT Glut4	up
Dapk3	8.24602	0.556093	0.563083	0.987586	0.323355	0.999959	L4/5 IT Glut4	up
Anp32e	12.1663	0.555781	0.444426	1.25056	0.211095	0.999959	L4/5 IT Glut4	up
Trib2	10.9104	0.555375	0.532828	1.04232	0.297265	0.999959	L4/5 IT Glut4	up
Flcn	5.82295	0.555331	0.66387	0.836506	0.402871	0.999959	L4/5 IT Glut4	up
Synm	2.96759	0.55525	0.94068	0.590264	0.555013	0.999959	L4/5 IT Glut4	up
Mfsd14a	24.411	0.555165	0.329095	1.68694	0.0916145	0.999959	L4/5 IT Glut4	up
Rybp	36.1857	0.554948	0.276703	2.00557	0.0449022	0.999959	L4/5 IT Glut4	up
Phactr2	10.4481	0.554385	0.558901	0.991919	0.321237	0.999959	L4/5 IT Glut4	up
Ankrd63	0.27323	0.554078	3.12549	0.177277	0.859291	0.999959	L4/5 IT Glut4	up
Ckap2l	0.27323	0.554078	3.12549	0.177277	0.859291	0.999959	L4/5 IT Glut4	up
Snx20	0.243755	0.553432	3.1428	0.176095	0.860219	0.999959	L4/5 IT Glut4	up
Dnaaf1	0.243755	0.553432	3.1428	0.176095	0.860219	0.999959	L4/5 IT Glut4	up
Fkbp4	6.13105	0.552926	0.662627	0.834445	0.40403	0.999959	L4/5 IT Glut4	up
Commd7	10.2552	0.552546	0.537107	1.02875	0.3036	0.999959	L4/5 IT Glut4	up
Shroom1	1.13373	0.551877	1.46506	0.376692	0.706402	0.999959	L4/5 IT Glut4	up
Ttc23	4.1815	0.551357	0.75725	0.728104	0.46655	0.999959	L4/5 IT Glut4	up
Prss27	0.698461	0.551354	1.93463	0.284992	0.77565	0.999959	L4/5 IT Glut4	up
Cd3eap	4.3147	0.550989	0.861255	0.639752	0.522334	0.999959	L4/5 IT Glut4	up
Prrg2	2.03129	0.550693	1.07036	0.514495	0.606906	0.999959	L4/5 IT Glut4	up
Atp2c2	0.481786	0.550539	2.27159	0.242358	0.808503	0.999959	L4/5 IT Glut4	up
Ddx11	1.36149	0.550085	1.38909	0.396003	0.692103	0.999959	L4/5 IT Glut4	up
Apod	1.59904	0.550077	1.37527	0.399978	0.689173	0.999959	L4/5 IT Glut4	up
Otof	0.37028	0.550044	2.86957	0.191682	0.847991	0.999959	L4/5 IT Glut4	up
Col7a1	0.37028	0.550044	2.86957	0.191682	0.847991	0.999959	L4/5 IT Glut4	up
Arhgap28	0.37028	0.550044	2.86957	0.191682	0.847991	0.999959	L4/5 IT Glut4	up
Cgrrf1	11.5297	0.54978	0.479106	1.14751	0.25117	0.999959	L4/5 IT Glut4	up
Dbnl	7.29614	0.549469	0.571686	0.961136	0.336484	0.999959	L4/5 IT Glut4	up
Synpr	37.892	0.549022	0.286768	1.91451	0.0555545	0.999959	L4/5 IT Glut4	up
Cep19	14.1676	0.548633	0.441841	1.2417	0.214348	0.999959	L4/5 IT Glut4	up
Sapcd2	0.246552	0.548291	3.12657	0.175365	0.860793	0.999959	L4/5 IT Glut4	up
Mavs	0.246552	0.548291	3.12657	0.175365	0.860793	0.999959	L4/5 IT Glut4	up
Tmprss11c	0.246552	0.548291	3.12657	0.175365	0.860793	0.999959	L4/5 IT Glut4	up
Irf5	0.246552	0.548291	3.12657	0.175365	0.860793	0.999959	L4/5 IT Glut4	up
Rnf212b	0.246552	0.548291	3.12657	0.175365	0.860793	0.999959	L4/5 IT Glut4	up
Csrp2	0.831837	0.547964	1.67169	0.327791	0.743069	0.999959	L4/5 IT Glut4	up
Chst9	1.82115	0.547902	1.24878	0.43875	0.660843	0.999959	L4/5 IT Glut4	up
Cwc25	11.1625	0.54768	0.474544	1.15412	0.248451	0.999959	L4/5 IT Glut4	up
Tsr2	4.44562	0.547442	0.733761	0.746077	0.455621	0.999959	L4/5 IT Glut4	up
Phb	7.78585	0.54736	0.554399	0.987303	0.323494	0.999959	L4/5 IT Glut4	up
Gm266	0.444234	0.547355	2.33046	0.23487	0.81430970879837306	0.999959	L4/5 IT Glut4	up
Vstm2l	13.3363	0.546926	0.440983	1.24024	0.214885	0.999959	L4/5 IT Glut4	up
Slc35c1	0.427672	0.546827	2.35337	0.232359	0.81626	0.999959	L4/5 IT Glut4	up
Lyzl4	64.9671	0.546826	0.219217	2.49445	0.0126151	0.999959	L4/5 IT Glut4	up
Mfsd4b1	2.1247	0.546796	1.05763	0.517001	0.605156	0.999959	L4/5 IT Glut4	up
Ankef1	6.37335	0.546259	0.63443	0.861024	0.389225	0.999959	L4/5 IT Glut4	up
Myh14	0.9383	0.545901	1.734	0.314822	0.752897	0.999959	L4/5 IT Glut4	up
Trim43c	0.597984	0.54579	2.3571	0.231552	0.816886	0.999959	L4/5 IT Glut4	up
Faap20	4.26295	0.545717	0.75194	0.725746	0.467995	0.999959	L4/5 IT Glut4	up
Maged2	0.585672	0.545303	2.10604	0.258923	0.795695	0.999959	L4/5 IT Glut4	up
Stk19	25.3666	0.54521	0.322616	1.68997	0.0910343	0.999959	L4/5 IT Glut4	up
Stx4a	18.1481	0.545123	0.375436	1.45197	0.146509	0.999959	L4/5 IT Glut4	up
Uba52	3.75431	0.544965	0.859006	0.634413	0.525811	0.999959	L4/5 IT Glut4	up
Hint2	3.04659	0.544934	0.910302	0.59863	0.54942	0.999959	L4/5 IT Glut4	up
H6pd	1.81975	0.544762	1.18786	0.458609	0.646515	0.999959	L4/5 IT Glut4	up
Tbata	0.70913	0.544681	2.06683	0.263535	0.792139	0.999959	L4/5 IT Glut4	up
Pdia5	11.7172	0.5445	0.462922	1.17622	0.239505	0.999959	L4/5 IT Glut4	up
Zfp446	2.03293	0.54424	1.09027	0.499179	0.617653	0.999959	L4/5 IT Glut4	up
Vtn	0.545663	0.544129	2.44326	0.222706	0.823764	0.999959	L4/5 IT Glut4	up
Rps13	14.8879	0.543784	0.431032	1.26159	0.207098	0.999959	L4/5 IT Glut4	up
Rab11fip5	8.42031	0.543575	0.533958	1.01801	0.308673	0.999959	L4/5 IT Glut4	up
Ppp1ca	4.648	0.543525	0.749209	0.725464	0.468167	0.999959	L4/5 IT Glut4	up
Rffl	9.45216	0.543186	0.569283	0.954159	0.340003	0.999959	L4/5 IT Glut4	up
Hadh	0.675798	0.54283	2.02733	0.267755	0.788888	0.999959	L4/5 IT Glut4	up
Gm10931	0.938517	0.542604	1.6857	0.321886	0.747539	0.999959	L4/5 IT Glut4	up
Itga6	8.85096	0.542263	0.545619	0.993849	0.320296	0.999959	L4/5 IT Glut4	up
Smim10l1	8.42207	0.541861	0.54966	0.985812	0.324225	0.999959	L4/5 IT Glut4	up
Vps72	10.2608	0.541616	0.490149	1.105	0.269158	0.999959	L4/5 IT Glut4	up
Rpf2	6.64884	0.541107	0.62451	0.86645	0.386244	0.999959	L4/5 IT Glut4	up
Hist1h2be	12.3472	0.540864	0.499352	1.08313	0.27875	0.999959	L4/5 IT Glut4	up
Tmem169	13.2781	0.540582	0.443443	1.21906	0.222822	0.999959	L4/5 IT Glut4	up
Lrrc3b	59.0511	0.540507	0.227524	2.3756	0.0175205	0.999959	L4/5 IT Glut4	up
Sh2b1	8.15719	0.540105	0.55273	0.977158	0.328491	0.999959	L4/5 IT Glut4	up
Zfp354b	0.883194	0.539842	1.6445	0.32827	0.742707	0.999959	L4/5 IT Glut4	up
Ftl1	3.95412	0.539697	0.930243	0.580168	0.561802	0.999959	L4/5 IT Glut4	up
[truncated: 447,905+ more rows]

## Sheet: Table S6
gene	baseMean	log2FoldChange	lfcSE	stat	pvalue	padj	Cell_Type_2	DE
Hmcn2	1.00515	2.94471	1.89602	1.5531	0.1204	0.99994	L4/5 IT Glut	up
Ttll9	2.28153	2.66	1.24231	2.14118	0.0322594	0.99994	L4/5 IT Glut	up
Gm10999	1.40011	2.53107	1.54928	1.63371	0.102321	0.99994	L4/5 IT Glut	up
Slc22a12	0.99907	2.38241	1.81132	1.31529	0.188413	0.99994	L4/5 IT Glut	up
Cd109	1.59955	2.33248	1.49361	1.56165	0.118372	0.99994	L4/5 IT Glut	up
Fgf17	1.24812	2.30987	1.6601	1.39141	0.164102	0.99994	L4/5 IT Glut	up
Cd36	0.524233	2.30275	2.42054	0.951335	0.341434	0.99994	L4/5 IT Glut	up
1810009A15Rik	1.51095	2.2943	1.44179	1.59129	0.111545	0.99994	L4/5 IT Glut	up
Ankub1	0.830319	2.25598	1.85534	1.21594	0.224008	0.99994	L4/5 IT Glut	up
Trp63	0.905927	2.2527	1.77507	1.26908	0.204413	0.99994	L4/5 IT Glut	up
Hist1h2ae	0.736276	2.21184	1.99132	1.11074	0.26668	0.99994	L4/5 IT Glut	up
Cd200r3	0.584984	2.19323	2.49008	0.880786	0.378434	0.99994	L4/5 IT Glut	up
1700067K01Rik	0.767944	2.18721	2.24484	0.974329	0.329893	0.99994	L4/5 IT Glut	up
Syk	2.53507	2.17661	1.14159	1.90666	0.0565651	0.99994	L4/5 IT Glut	up
Lime1	0.707925	2.16446	2.04027	1.06087	0.28875	0.99994	L4/5 IT Glut	up
Ddx3y	91.3899	2.16336	1.2144	1.78142	0.0748438	0.99994	L4/5 IT Glut	up
Fscn3	0.745548	2.12774	2.28655	0.930546	0.352088	0.99994	L4/5 IT Glut	up
Cd79a	1.12484	2.12587	1.64648	1.29116	0.196647	0.99994	L4/5 IT Glut	up
Tmem37	1.30328	2.11093	1.56388	1.3498	0.17708	0.99994	L4/5 IT Glut	up
Syce1	1.46636	2.10649	1.4261	1.4771	0.13965	0.99994	L4/5 IT Glut	up
Arhgap28	1.22827	2.10452	1.54494	1.36221	0.173133	0.99994	L4/5 IT Glut	up
Kcnj8	1.10699	2.1022	1.76409	1.19166	0.233394	0.99994	L4/5 IT Glut	up
A1cf	0.442171	2.07525	2.5898	0.801316	0.422949	0.99994	L4/5 IT Glut	up
Adig	2.94081	2.02238	1.13516	1.78159	0.0748165	0.99994	L4/5 IT Glut	up
Gm14569	0.582795	2.01733	2.06194	0.978365	0.327894	0.99994	L4/5 IT Glut	up
Fndc1	1.49306	2.0157	1.55977	1.29231	0.19625000601537201	0.99994	L4/5 IT Glut	up
1700093K21Rik	2.27884	2.01505	1.1968	1.68369	0.0922406	0.99994	L4/5 IT Glut	up
Tac4	0.609175	2.01203	2.12811	0.94545	0.344429	0.99994	L4/5 IT Glut	up
Syndig1l	0.753311	1.98542	1.99622	0.994591	0.319935	0.99994	L4/5 IT Glut	up
Mdfic	0.727955	1.98306	2.01511	0.984093	0.32507	0.99994	L4/5 IT Glut	up
Gm5678	0.521778	1.97642	2.61741	0.755105	0.450186	0.99994	L4/5 IT Glut	up
H2-DMb2	0.64307	1.96791	2.41491	0.814902	0.415129	0.99994	L4/5 IT Glut	up
Gpr151	0.459626	1.96552	2.74626	0.715709	0.474171	0.99994	L4/5 IT Glut	up
Isg20	0.606763	1.96471	2.46761	0.7962	0.425916	0.99994	L4/5 IT Glut	up
Tnfaip8l2	0.651925	1.96334	2.11208	0.929574	0.352592	0.99994	L4/5 IT Glut	up
Ccdc146	1.52564	1.96321	1.38262	1.41992	0.155632	0.99994	L4/5 IT Glut	up
Insl6	0.778311	1.95622	2.07775	0.94151	0.346443	0.99994	L4/5 IT Glut	up
Ccl21a	0.452154	1.95536	2.76233	0.707867	0.47902807171642803	0.99994	L4/5 IT Glut	up
Trib3	0.476022	1.95378	2.71618	0.719312	0.471949	0.99994	L4/5 IT Glut	up
Colec11	2.51201	1.95252	1.10785	1.76243	0.0779961	0.99994	L4/5 IT Glut	up
Slc26a7	2.14055	1.94955	1.27727	1.52634	0.126925	0.99994	L4/5 IT Glut	up
C2cd4d	0.791651	1.94059	1.97358	0.983285	0.325467	0.99994	L4/5 IT Glut	up
Uty	333.235	1.93476	1.35394	1.42898	0.15301	0.99994	L4/5 IT Glut	up
Gypc	1.47953	1.92416	1.42313	1.35207	0.176354	0.99994	L4/5 IT Glut	up
Misp	2.51252	1.92226	1.09887	1.7493	0.0802389	0.99994	L4/5 IT Glut	up
Cdc42ep4	2.25221	1.91908	1.25194	1.53289	0.125304	0.99994	L4/5 IT Glut	up
Dnase1l3	3.14528	1.91553	1.07329	1.78472	0.0743061	0.99994	L4/5 IT Glut	up
Ms4a6c	0.896608	1.90789	1.98449	0.961403	0.33635	0.99994	L4/5 IT Glut	up
Klhl14	1.01087	1.87993	1.90825	0.98516	0.324546	0.99994	L4/5 IT Glut	up
Eif2s3y	213.995	1.86903	1.32431	1.41133	0.158147	0.99994	L4/5 IT Glut	up
Hus1b	1.62249	1.8666	1.35159	1.38104	0.167268	0.99994	L4/5 IT Glut	up
Apoc4	0.398876	1.84454	2.90778	0.634346	0.525855	0.99994	L4/5 IT Glut	up
Hist1h4c	0.608578	1.8414	2.1637	0.851044	0.394745	0.99994	L4/5 IT Glut	up
Enho	3.02839	1.8336	1.07089	1.71222	0.0868567	0.99994	L4/5 IT Glut	up
Abi3	0.577028	1.8325	2.71778	0.674262	0.500145	0.99994	L4/5 IT Glut	up
Myh8	0.37106	1.83054	2.99011	0.612198	0.540407	0.99994	L4/5 IT Glut	up
Foxj1	0.334753	1.82479	3.11747	0.585344	0.558316	0.99994	L4/5 IT Glut	up
Gas2l2	1.08939	1.82302	1.6779	1.08649	0.277263	0.99994	L4/5 IT Glut	up
A730061H03Rik	0.925924	1.80934	1.93029	0.937341	0.348583	0.99994	L4/5 IT Glut	up
Cnksr1	0.598028	1.80764	2.31809	0.779801	0.435508	0.99994	L4/5 IT Glut	up
Smim6	1.03925	1.80478	1.77278	1.01805	0.308654	0.99994	L4/5 IT Glut	up
Naip1	3.24141	1.78154	1.01516	1.75493	0.0792709	0.99994	L4/5 IT Glut	up
Kdm5d	98.8264	1.76838	1.26793	1.3947	0.163107	0.99994	L4/5 IT Glut	up
Rho	1.29419	1.76321	1.53133	1.15143	0.249557	0.99994	L4/5 IT Glut	up
Itgal	0.795118	1.72791	2.08543	0.828563	0.407352	0.99994	L4/5 IT Glut	up
Rest	3.0662	1.72611	1.11309	1.55074	0.120965	0.99994	L4/5 IT Glut	up
Fam181a	0.49545	1.72586	2.88701	0.597801	0.549972	0.99994	L4/5 IT Glut	up
Ahrr	1.17465	1.72397	1.62501	1.0609	0.288736	0.99994	L4/5 IT Glut	up
Tmem45a2	0.806918	1.71977	1.95075	0.881597	0.377995	0.99994	L4/5 IT Glut	up
Plekhs1	0.835426	1.70091	1.84941	0.919703	0.357728	0.99994	L4/5 IT Glut	up
Tpm3-rs7	1.64685	1.69568	1.29643	1.30797	0.190885	0.99994	L4/5 IT Glut	up
P2rx5	0.687809	1.69088	2.18829	0.772697	0.439702	0.99994	L4/5 IT Glut	up
Dbil5	1.37122	1.67948	1.50962	1.11252	0.265916	0.99994	L4/5 IT Glut	up
Vsig8	0.768054	1.67038	2.09378	0.797779	0.424999	0.99994	L4/5 IT Glut	up
Ankrd36	0.896646	1.66905	1.76749	0.944303	0.345015	0.99994	L4/5 IT Glut	up
Adam5	2.44593	1.65308	1.22793	1.34623	0.178228	0.99994	L4/5 IT Glut	up
Tmem125	1.47456	1.64247	1.49561	1.0982	0.272118	0.99994	L4/5 IT Glut	up
Cpa4	0.895063	1.63096	1.89642	0.860021	0.389778	0.99994	L4/5 IT Glut	up
Rsad2	0.744621	1.63091	2.17259	0.750675	0.452848	0.99994	L4/5 IT Glut	up
Ccdc87	0.849404	1.62407	1.91046	0.850095	0.395272	0.99994	L4/5 IT Glut	up
Fam209	0.577819	1.61673	2.34247	0.690181	0.490081	0.99994	L4/5 IT Glut	up
Omp	0.253175	1.60935	3.13535	0.513293	0.607747	0.99994	L4/5 IT Glut	up
Glipr1l3	0.253175	1.60935	3.13535	0.513293	0.607747	0.99994	L4/5 IT Glut	up
Fbxo43	0.253175	1.60935	3.13535	0.513293	0.607747	0.99994	L4/5 IT Glut	up
Tfap2b	0.360108	1.60915	3.03996	0.529333	0.596574	0.99994	L4/5 IT Glut	up
Agtr1a	0.48322	1.60903	2.34916	0.684937	0.493383	0.99994	L4/5 IT Glut	up
Ube2d2b	0.29647	1.60757	3.13507	0.512769	0.608113	0.99994	L4/5 IT Glut	up
Allc	1.01567	1.60582	1.69835	0.945515	0.344396	0.99994	L4/5 IT Glut	up
Spp1	1.64852	1.59604	1.44038	1.10807	0.26783	0.99994	L4/5 IT Glut	up
Lck	1.97203	1.59569	1.23467	1.2924	0.19622	0.99994	L4/5 IT Glut	up
Gm26602	0.288998	1.59543	3.13335	0.509177	0.610628	0.99994	L4/5 IT Glut	up
Myoz3	0.288998	1.59543	3.13335	0.509177	0.610628	0.99994	L4/5 IT Glut	up
Gna14	1.31056	1.59321	1.55852	1.02226	0.306658	0.99994	L4/5 IT Glut	up
Themis2	0.342225	1.5923126252389601	3.12855	0.508963	0.610778	0.99994	L4/5 IT Glut	up
Zbtb32	1.54861	1.59054	1.31699	1.20771	0.227158	0.99994	L4/5 IT Glut	up
Slc22a7	0.584055	1.58701	2.3474	0.676072	0.498995	0.99994	L4/5 IT Glut	up
Accsl	2.13013	1.58498	1.20132	1.31937	0.187046	0.99994	L4/5 IT Glut	up
Prm1	1.45186	1.58017	1.4169	1.11523	0.264751	0.99994	L4/5 IT Glut	up
Ppp3r2	0.561907	1.57854	2.35689	0.669757	0.503013	0.99994	L4/5 IT Glut	up
Col6a6	1.02085	1.57754	1.70203	0.926858	0.354	0.99994	L4/5 IT Glut	up
Abca13	2.79526	1.57322	1.09578	1.4357	0.151087	0.99994	L4/5 IT Glut	up
Tmem262	0.615427	1.56925	2.16437	0.725042	0.468426	0.99994	L4/5 IT Glut	up
Ikbke	1.26825	1.56878	1.52684	1.02747	0.304199	0.99994	L4/5 IT Glut	up
Glyctk	1.17605	1.56121	1.68687	0.925507	0.354702	0.99994	L4/5 IT Glut	up
Cyp26c1	0.408375	1.56116	3.12868	0.498985	0.61779	0.99994	L4/5 IT Glut	up
Lrrc74b	5.26929	1.54798	0.750416	2.06283	0.0391291	0.99994	L4/5 IT Glut	up
Gm9887	1.49871	1.53834	1.43029	1.07554	0.282132	0.99994	L4/5 IT Glut	up
Exoc3l2	1.23037	1.53538	1.60638	0.955797	0.339175	0.99994	L4/5 IT Glut	up
Milr1	3.24813	1.52095	0.994599	1.52921	0.126212	0.99994	L4/5 IT Glut	up
Psapl1	0.854368	1.51875	1.78054	0.852971	0.393675	0.99994	L4/5 IT Glut	up
Myrfl	5.28599	1.50432	0.844893	1.78049	0.0749966	0.99994	L4/5 IT Glut	up
Tmem51	0.334269	1.5034	3.13593	0.479413	0.631645	0.99994	L4/5 IT Glut	up
Krt7	0.334269	1.5034	3.13593	0.479413	0.631645	0.99994	L4/5 IT Glut	up
Nid1	1.44562	1.49972	1.61839	0.926677	0.354094	0.99994	L4/5 IT Glut	up
Adtrp	1.05763	1.49933	1.70361	0.880087	0.378812	0.99994	L4/5 IT Glut	up
Mageb3	0.370092	1.48887	3.13379	0.475103	0.634714	0.99994	L4/5 IT Glut	up
Stac	1.47462	1.48659	1.53416	0.968996	0.332547	0.99994	L4/5 IT Glut	up
Mboat4	0.64047	1.48655	2.25115	0.660353	0.509027	0.99994	L4/5 IT Glut	up
Sult3a2	1.29758	1.47942	1.54397	0.958197	0.337963	0.99994	L4/5 IT Glut	up
Tbc1d10c	1.37897	1.46818	1.51454	0.969387	0.332352	0.99994	L4/5 IT Glut	up
Samd9l	1.12314	1.46438	1.63856	0.893697	0.371484	0.99994	L4/5 IT Glut	up
Ttc12	0.453606	1.4586	3.0111	0.484407	0.628097	0.99994	L4/5 IT Glut	up
A830005F24Rik	0.763646	1.45135	2.08197	0.697105	0.485737	0.99994	L4/5 IT Glut	up
A4galt	9.28661	1.44461	0.615827	2.34581	0.018986	0.99994	L4/5 IT Glut	up
Serpinb6c	2.04354	1.43723	1.24648	1.15304	0.248896	0.99994	L4/5 IT Glut	up
Ros1	0.859204	1.43434	2.0097	0.713708	0.475408	0.99994	L4/5 IT Glut	up
Rnf148	0.839828	1.43331	2.01102	0.712727	0.476015	0.99994	L4/5 IT Glut	up
Cdrt4	0.73047	1.42314	2.00465	0.709919	0.477754	0.99994	L4/5 IT Glut	up
Def6	0.391403	1.41325	3.12374	0.452422	0.650965	0.99994	L4/5 IT Glut	up
A730071L15Rik	0.966302	1.4115	1.77015	0.797391	0.425224	0.99994	L4/5 IT Glut	up
Nnmt	0.789393	1.4019	1.86273	0.752603	0.451689	0.99994	L4/5 IT Glut	up
Fgfr4	0.440199	1.39589	3.04964	0.457722	0.647152	0.99994	L4/5 IT Glut	up
Ngp	0.649337	1.39575	2.24674	0.621233	0.534447	0.99994	L4/5 IT Glut	up
Gm36864	0.253659	1.39521	3.1414	0.444136	0.656944	0.99994	L4/5 IT Glut	up
Gimap6	0.340249	1.39185	3.14126	0.443086	0.657704	0.99994	L4/5 IT Glut	up
Arid3c	2.92753	1.38771	0.970631	1.4297	0.152804	0.99994	L4/5 IT Glut	up
Cass4	1.46526	1.38556	1.36699	1.01359	0.310779	0.99994	L4/5 IT Glut	up
Casp4	0.580227	1.3849	2.34565	0.590414	0.554913	0.99994	L4/5 IT Glut	up
Enpep	1.01651	1.38341	1.818	0.76095	0.446687	0.99994	L4/5 IT Glut	up
Tnfaip3	5.41026	1.38307	0.766329	1.8048	0.0711058	0.99994	L4/5 IT Glut	up
Hhex	0.491057	1.38056	2.49391	0.553574	0.57987	0.99994	L4/5 IT Glut	up
Unc45b	0.289482	1.37993	3.13925	0.439575	0.660245	0.99994	L4/5 IT Glut	up
Cdhr2	0.289482	1.37993	3.13925	0.439575	0.660245	0.99994	L4/5 IT Glut	up
Pld4	0.994509	1.37906	1.72008	0.801741	0.422703	0.99994	L4/5 IT Glut	up
Efcab11	2.7963	1.37737	1.0499	1.31191	0.189549	0.99994	L4/5 IT Glut	up
Tmc6	1.49476	1.37522	1.43578	0.95782	0.338154	0.99994	L4/5 IT Glut	up
Rasgrp3	2.43532	1.37453	1.19647	1.14883	0.250628	0.99994	L4/5 IT Glut	up
Hamp	0.350665	1.3742	3.12226	0.440129	0.659844	0.99994	L4/5 IT Glut	up
Cryba2	0.481357	1.37198	2.5074	0.547171	0.584261	0.99994	L4/5 IT Glut	up
D630044L22Rik	1.31898	1.36951	1.41201	0.969899	0.332097	0.99994	L4/5 IT Glut	up
Rpl10-ps3	1.34462	1.36814	1.55898	0.877585	0.380169	0.99994	L4/5 IT Glut	up
Gtf2a1l	0.309341	1.36438	3.1366	0.434986	0.663573	0.99994	L4/5 IT Glut	up
Gm26558	0.245703	1.36338	3.1364	0.434696	0.663783	0.99994	L4/5 IT Glut	up
D6Ertd527e	0.245703	1.36338	3.1364	0.434696	0.663783	0.99994	L4/5 IT Glut	up
Olfr692	0.245703	1.36338	3.1364	0.434696	0.663783	0.99994	L4/5 IT Glut	up
Ska1	0.245703	1.36338	3.1364	0.434696	0.663783	0.99994	L4/5 IT Glut	up
Gimap8	0.252691	1.36158	3.13985	0.433646	0.664546	0.99994	L4/5 IT Glut	up
Foxr1	0.252691	1.36158	3.13985	0.433646	0.664546	0.99994	L4/5 IT Glut	up
Ltb4r2	0.252691	1.36158	3.13985	0.433646	0.664546	0.99994	L4/5 IT Glut	up
Robo4	0.332293	1.35993	3.13625	0.433616	0.664567	0.99994	L4/5 IT Glut	up
Gdnf	0.41382	1.35197	3.11908	0.433451	0.664687	0.99994	L4/5 IT Glut	up
Odf4	1.30875	1.3513	1.49784	0.902167	0.366968	0.99994	L4/5 IT Glut	up
Notch4	1.00695	1.34983	1.74759	0.772395	0.439881	0.99994	L4/5 IT Glut	up
Nuggc	0.487317	1.349	2.492	0.541331	0.588279	0.99994	L4/5 IT Glut	up
Fam92b	0.48310085774767503	1.34878	2.50347	0.538763	0.59005	0.99994	L4/5 IT Glut	up
C130026I21Rik	0.923966	1.34665	1.62481	0.828803	0.407216	0.99994	L4/5 IT Glut	up
Nradd	2.64716	1.34204	1.04278	1.28699	0.198099	0.99994	L4/5 IT Glut	up
Gm8113	0.393799	1.33991	2.69179	0.497776	0.618642	0.99994	L4/5 IT Glut	up
Gm11273	0.304426	1.3392	3.13448	0.427248	0.669199	0.99994	L4/5 IT Glut	up
Cby3	1.44951	1.33744	1.52598	0.876448	0.380787	0.99994	L4/5 IT Glut	up
Stk31	2.18623	1.3374	1.10558	1.20968	0.226401	0.99994	L4/5 IT Glut	up
Gprc5c	0.635401	1.33597	2.26227	0.590542	0.554828	0.99994	L4/5 IT Glut	up
1700123L14Rik	0.447762	1.33551	2.56676	0.520309	0.602848	0.99994	L4/5 IT Glut	up
Slc1a7	0.488669	1.33339	2.50395	0.532515	0.594369	0.99994	L4/5 IT Glut	up
Gm5127	0.495757	1.3312	2.48375	0.535962	0.591985	0.99994	L4/5 IT Glut	up
Grpr	1.09297	1.33096	1.75734	0.757371	0.448827	0.99994	L4/5 IT Glut	up
Fcrl5	0.490692	1.3306	2.49735	0.532807	0.594167	0.99994	L4/5 IT Glut	up
Ttc29	0.490692	1.3306	2.49735	0.532807	0.594167	0.99994	L4/5 IT Glut	up
Magel2	0.308373	1.32988	3.13503	0.424201	0.671419	0.99994	L4/5 IT Glut	up
Lyz2	0.308373	1.32988	3.13503	0.424201	0.671419	0.99994	L4/5 IT Glut	up
Olfr545	2.48149	1.32857	1.11016	1.19674	0.231409	0.99994	L4/5 IT Glut	up
Amh	1.92103	1.32844	1.38557	0.958764	0.337678	0.99994	L4/5 IT Glut	up
Tagln	1.19358	1.32404	1.49138	0.887795	0.37465122028243403	0.99994	L4/5 IT Glut	up
Mst1	1.14779	1.32301	1.6148	0.819303	0.412613	0.99994	L4/5 IT Glut	up
Prss23	1.58156	1.32204	1.45845	0.906463	0.364691	0.99994	L4/5 IT Glut	up
Arhgef5	0.324285	1.3194	3.13152	0.42133	0.673514	0.99994	L4/5 IT Glut	up
Tectb	0.403983	1.31774	2.66411	0.494628	0.620863	0.99994	L4/5 IT Glut	up
Prr11	0.831701	1.31556	2.22159	0.592172	0.553735	0.99994	L4/5 IT Glut	up
Adamtsl3	6.8431	1.31443	0.743454	1.768	0.0770606	0.99994	L4/5 IT Glut	up
Eda2r	0.510552	1.3102	2.45888	0.532844	0.594141	0.99994	L4/5 IT Glut	up
Mas1	7.3272418343956804	1.30898	0.693353	1.8879	0.0590399	0.99994	L4/5 IT Glut	up
Popdc3	1.34206	1.30856	1.51296	0.864902	0.387093	0.99994	L4/5 IT Glut	up
Kynu	0.681874	1.30801	2.19125	0.596926	0.550557	0.99994	L4/5 IT Glut	up
4933405L10Rik	0.551823	1.30388	2.3935	0.544758	0.58592	0.99994	L4/5 IT Glut	up
Prokr2	0.81969	1.28945	1.87001	0.689544	0.490481	0.99994	L4/5 IT Glut	up
Batf2	1.56115	1.28893	1.33477	0.965655	0.334217	0.99994	L4/5 IT Glut	up
Cdc42bpg	0.75389	1.28747	1.96112	0.656497	0.511504	0.99994	L4/5 IT Glut	up
Rpusd2	1.67022	1.28732	1.30449	0.986838	0.323722	0.99994	L4/5 IT Glut	up
Pou2f3	0.638609	1.28499	1.98926	0.645966	0.518301	0.99994	L4/5 IT Glut	up
Plaur	0.567574	1.27797	2.37388	0.538347	0.590337	0.99994	L4/5 IT Glut	up
Cdc20	2.03101	1.27544	1.27891	0.997292	0.318623	0.99994	L4/5 IT Glut	up
Vangl1	0.788451	1.26995	2.05595	0.617696	0.536776	0.99994	L4/5 IT Glut	up
Crh	2.77151	1.26538	1.01967	1.24097	0.214617	0.99994	L4/5 IT Glut	up
Atp10b	1.0197	1.26385	1.78977	0.706151	0.480094	0.99994	L4/5 IT Glut	up
Adamts15	1.27914	1.261	1.47282	0.856176	0.3919	0.99994	L4/5 IT Glut	up
Rasd1	0.683972	1.25234	2.1726	0.576425	0.564328	0.99994	L4/5 IT Glut	up
Cd52	3.86331	1.25208	0.834974	1.49954	0.133734	0.99994	L4/5 IT Glut	up
Pelo	6.48208	1.24798	0.744147	1.67706	0.0935307	0.99994	L4/5 IT Glut	up
Cyp27b1	0.803117	1.24408	1.94931	0.638217	0.523333	0.99994	L4/5 IT Glut	up
Cpt2	2.05292	1.24355	1.17776	1.05586	0.29103	0.99994	L4/5 IT Glut	up
Hif3a	2.62741	1.2371	1.10033	1.1243	0.260886	0.99994	L4/5 IT Glut	up
Tlr3	1.72928	1.23503	1.25727	0.982307	0.325949	0.99994	L4/5 IT Glut	up
Mst1r	1.01353	1.23374	1.75409	0.703351	0.481837	0.99994	L4/5 IT Glut	up
Casp12	1.05764	1.23301	1.79042	0.68867	0.491031	0.99994	L4/5 IT Glut	up
Fam167a	0.922665	1.22859	1.98551	0.618777	0.536063	0.99994	L4/5 IT Glut	up
Skint6	1.956	1.22846	1.2029	1.02125	0.307137	0.99994	L4/5 IT Glut	up
Txk	0.564428	1.22818	2.51667	0.488017	0.625538	0.99994	L4/5 IT Glut	up
Gadd45a	0.59561	1.22417	2.46426	0.496769	0.619352	0.99994	L4/5 IT Glut	up
Baz1a	24.9709	1.22194	0.366379	3.33519	8.5241341441452e-4	0.75313	L4/5 IT Glut	up
Itk	1.03103	1.22161	1.66839	0.732207	0.464042	0.99994	L4/5 IT Glut	up
Lrrc63	1.3387	1.21837	1.54864	0.786733	0.431438	0.99994	L4/5 IT Glut	up
Cish	4.69773	1.21533	0.781193	1.55573	0.119772	0.99994	L4/5 IT Glut	up
Btk	10.2758	1.2142	0.666559	1.8216	0.0685159	0.99994	L4/5 IT Glut	up
Cldn22	2.07319	1.21325	1.22403	0.991197	0.321589	0.99994	L4/5 IT Glut	up
Fbln5	4.44811	1.2126	0.782981	1.54869	0.121456	0.99994	L4/5 IT Glut	up
Ntn1	1.74048	1.20852	1.30894	0.923279	0.355862	0.99994	L4/5 IT Glut	up
Rem2	4.21642	1.20387	0.836439	1.43928	0.150072	0.99994	L4/5 IT Glut	up
St3gal1	1.6495	1.20162	1.40875	0.852967	0.393677	0.99994	L4/5 IT Glut	up
Slc8b1	0.649465	1.19845	2.38596	0.502291	0.615463	0.99994	L4/5 IT Glut	up
Plek2	1.80691	1.19812	1.23019	0.973928	0.330092	0.99994	L4/5 IT Glut	up
Glb1l3	0.491773	1.19723	2.6557	0.450815	0.652123	0.99994	L4/5 IT Glut	up
Hcst	0.882965	1.1972	1.80274	0.664097	0.506628	0.99994	L4/5 IT Glut	up
Zfp189	9.49228	1.19266	0.598245	1.9936	0.0461954	0.99994	L4/5 IT Glut	up
Haao	0.82426	1.19194	1.94063	0.614206	0.539079	0.99994	L4/5 IT Glut	up
Slc18a1	2.84921	1.18914	0.938791	1.26667	0.205272	0.99994	L4/5 IT Glut	up
Lama5	3.9521	1.1889	0.85462	1.39114	0.164182	0.99994	L4/5 IT Glut	up
Npy	1.70612	1.18844	1.41244	0.841406	0.40012	0.99994	L4/5 IT Glut	up
Prss16	2.54435	1.18752	1.23827	0.959011	0.337553	0.99994	L4/5 IT Glut	up
Nes	0.613542	1.18644	2.48416	0.4776	0.632935	0.99994	L4/5 IT Glut	up
Sgo2b	0.710475	1.18524	2.2843	0.518861	0.603858	0.99994	L4/5 IT Glut	up
Serpinb1a	0.909835	1.18238	1.81085	0.652944	0.513792	0.99994	L4/5 IT Glut	up
Pla2g5	7.16186	1.18016	0.677375	1.74226	0.0814636	0.99994	L4/5 IT Glut	up
Vmn2r26	0.795634	1.18016	2.21336	0.533196	0.593898	0.99994	L4/5 IT Glut	up
Strc	1.78376	1.17922	1.18047	0.998937	0.317825	0.99994	L4/5 IT Glut	up
Cnga2	2.9157	1.17772	1.02132	1.15314	0.248854	0.99994	L4/5 IT Glut	up
Adad2	0.618026	1.17603	2.4293	0.484102	0.628313	0.99994	L4/5 IT Glut	up
Cd7	0.43655	1.17271	2.81648	0.416374	0.677136	0.99994	L4/5 IT Glut	up
Ildr1	0.817313	1.17212	1.95187	0.600511	0.548166	0.99994	L4/5 IT Glut	up
1700016D06Rik	1.48738	1.17162	1.44113	0.812986	0.416226	0.99994	L4/5 IT Glut	up
Llgl2	1.95872	1.16941	1.13565	1.02973	0.303137	0.99994	L4/5 IT Glut	up
Slc12a4	0.513547	1.16807	2.61616	0.446483	0.655248	0.99994	L4/5 IT Glut	up
Ptrh1	2.52871	1.16794	1.07549	1.08596	0.277499	0.99994	L4/5 IT Glut	up
Atp4a	0.472245	1.16416	2.51713	0.462495	0.643727	0.99994	L4/5 IT Glut	up
Awat2	0.876113	1.16196	1.87667	0.61916	0.535811	0.99994	L4/5 IT Glut	up
Trhr	1.02854	1.15516	1.72272	0.670543	0.502512	0.99994	L4/5 IT Glut	up
Zfp648	0.171596	1.15271	3.1518	0.365732	0.714565	0.99994	L4/5 IT Glut	up
Bcl2a1d	0.171596	1.15271	3.1518	0.365732	0.714565	0.99994	L4/5 IT Glut	up
Clic6	0.171596	1.15271	3.1518	0.365732	0.714565	0.99994	L4/5 IT Glut	up
Vmn1r224	0.171596	1.15271	3.1518	0.365732	0.714565	0.99994	L4/5 IT Glut	up
Ell3	0.171596	1.15271	3.1518	0.365732	0.714565	0.99994	L4/5 IT Glut	up
Trim50	0.171596	1.15271	3.1518	0.365732	0.714565	0.99994	L4/5 IT Glut	up
Olfr784	0.171596	1.15271	3.1518	0.365732	0.714565	0.99994	L4/5 IT Glut	up
Serpinb9	2.53138	1.15218	1.08131	1.06554	0.286632	0.99994	L4/5 IT Glut	up
Dleu7	1.53346	1.15209	1.53286	0.751592	0.452296	0.99994	L4/5 IT Glut	up
Olfr718-ps1	0.214892	1.15045	3.1515	0.365048	0.715076	0.99994	L4/5 IT Glut	up
C030005K15Rik	0.214892	1.15045	3.1515	0.365048	0.715076	0.99994	L4/5 IT Glut	up
Smpd5	0.214892	1.15045	3.1515	0.365048	0.715076	0.99994	L4/5 IT Glut	up
Trem3	0.214892	1.15045	3.1515	0.365048	0.715076	0.99994	L4/5 IT Glut	up
Dlx4	0.214892	1.15045	3.1515	0.365048	0.715076	0.99994	L4/5 IT Glut	up
Gm9922	0.214892	1.15045	3.1515	0.365048	0.715076	0.99994	L4/5 IT Glut	up
Vcam1	2.27753	1.14907	2.55841	0.449134	0.653335	0.99994	L4/5 IT Glut	up
Rhod	0.77431	1.14902	2.00481	0.573133	0.566555	0.99994	L4/5 IT Glut	up
3110082J24Rik	0.348044	1.14388	2.85279	0.40097	0.688442	0.99994	L4/5 IT Glut	up
Deup1	0.348044	1.14388	2.85279	0.40097	0.688442	0.99994	L4/5 IT Glut	up
Bdkrb2	1.01563	1.14256	1.71155	0.667557	0.504416	0.99994	L4/5 IT Glut	up
Gm11444	0.795529	1.14069	1.82418	0.625316	0.531764	0.99994	L4/5 IT Glut	up
Podnl1	0.615121	1.13773	2.06031	0.552213	0.580802	0.99994	L4/5 IT Glut	up
Shisal2a	0.3657	1.13747	2.7861	0.408265	0.683079	0.99994	L4/5 IT Glut	up
Pdc	0.3657	1.13747	2.7861	0.408265	0.683079	0.99994	L4/5 IT Glut	up
Drd2	0.20742	1.13553	3.14963	0.360527	0.718453	0.99994	L4/5 IT Glut	up
Amdhd1	0.20742	1.13553	3.14963	0.360527	0.718453	0.99994	L4/5 IT Glut	up
Cdh24	0.20742	1.13553	3.14963	0.360527	0.718453	0.99994	L4/5 IT Glut	up
Pole2	5.97408	1.13465	0.679923	1.6688	0.0951571	0.99994	L4/5 IT Glut	up
Slc43a3	0.234751	1.13245	3.14881	0.359643	0.719114	0.99994	L4/5 IT Glut	up
Mroh9	0.234751	1.13245	3.14881	0.359643	0.719114	0.99994	L4/5 IT Glut	up
Siglec1	0.171113	1.13125	3.14861	0.359286	0.719381	0.99994	L4/5 IT Glut	up
Lenep	0.171113	1.13125	3.14861	0.359286	0.719381	0.99994	L4/5 IT Glut	up
Catsper4	0.171113	1.13125	3.14861	0.359286	0.719381	0.99994	L4/5 IT Glut	up
Gm5741	0.171113	1.13125	3.14861	0.359286	0.719381	0.99994	L4/5 IT Glut	up
Slc22a13	0.171113	1.13125	3.14861	0.359286	0.719381	0.99994	L4/5 IT Glut	up
Taf9	2.2478	1.1288	1.1056043901191701	1.02098	0.307262	0.99994	L4/5 IT Glut	up
Ctrl	2.16008	1.12766	1.12966	0.998233	0.318166	0.99994	L4/5 IT Glut	up
Trim54	0.799895	1.12712	2.20871	0.510308	0.609836	0.99994	L4/5 IT Glut	up
Adprhl1	2.48955	1.12673	1.04604	1.07714	0.281418	0.99994	L4/5 IT Glut	up
Tmed6	0.707815	1.1262	1.9373	0.581322	0.561023	0.99994	L4/5 IT Glut	up
Wnt10b	2.47925	1.12558	1.08016	1.04205	0.29739	0.99994	L4/5 IT Glut	up
Acbd7	0.691798	1.12443	2.17736	0.516418	0.605563	0.99994	L4/5 IT Glut	up
Ucp1	1.54272	1.12343	1.41896	0.791728	0.428519	0.99994	L4/5 IT Glut	up
Cabp7	0.72751	1.12313	1.98609	0.565499	0.571734	0.99994	L4/5 IT Glut	up
Aire	0.227279	1.11729	3.14694	0.355041	0.722559	0.99994	L4/5 IT Glut	up
Lmo2	1.51829	1.11712	1.27712	0.874723	0.381725	0.99994	L4/5 IT Glut	up
Sp5	0.16364	1.11607	3.14673	0.354677	0.722832	0.99994	L4/5 IT Glut	up
Olfr552	0.16364	1.11607	3.14673	0.354677	0.722832	0.99994	L4/5 IT Glut	up
Lrrc8e	0.16364	1.11607	3.14673	0.354677	0.722832	0.99994	L4/5 IT Glut	up
Slc5a8	0.16364	1.11607	3.14673	0.354677	0.722832	0.99994	L4/5 IT Glut	up
D930007J09Rik	0.16364	1.11607	3.14673	0.354677	0.722832	0.99994	L4/5 IT Glut	up
Gfra3	0.16364	1.11607	3.14673	0.354677	0.722832	0.99994	L4/5 IT Glut	up
Fmo2	0.270574	1.11495	3.14663	0.354332	0.72309	0.99994	L4/5 IT Glut	up
Plekhg6	0.270574	1.11495	3.14663	0.354332	0.72309	0.99994	L4/5 IT Glut	up
Bcl3	0.270574	1.11495	3.14663	0.354332	0.72309	0.99994	L4/5 IT Glut	up
Lctl	0.270574	1.11495	3.14663	0.354332	0.72309	0.99994	L4/5 IT Glut	up
Fam186a	0.270574	1.11495	3.14663	0.354332	0.72309	0.99994	L4/5 IT Glut	up
Tbx1	0.270574	1.11495	3.14663	0.354332	0.72309	0.99994	L4/5 IT Glut	up
E230025N22Rik	0.270574	1.11495	3.14663	0.354332	0.72309	0.99994	L4/5 IT Glut	up
Gm9844	0.533849	1.11445	2.42819	0.458965	0.646259	0.99994	L4/5 IT Glut	up
Gimap5	0.206936	1.11373	3.14643	0.353968	0.723363	0.99994	L4/5 IT Glut	up
Ppp1r17	0.206936	1.11373	3.14643	0.353968	0.723363	0.99994	L4/5 IT Glut	up
Lcat	0.206936	1.11373	3.14643	0.353968	0.723363	0.99994	L4/5 IT Glut	up
Myo1g	0.206936	1.11373	3.14643	0.353968	0.723363	0.99994	L4/5 IT Glut	up
Gm10184	0.206936	1.11373	3.14643	0.353968	0.723363	0.99994	L4/5 IT Glut	up
Cldn34d	0.206936	1.11373	3.14643	0.353968	0.723363	0.99994	L4/5 IT Glut	up
Apod	9.94089	1.11217	0.630967	1.76264	0.0779606	0.99994	L4/5 IT Glut	up
Gm4788	0.843115	1.11172	2.04506	0.543611	0.586709	0.99994	L4/5 IT Glut	up
Ninj1	1.80702	1.11159	1.41171	0.787403	0.431046	0.99994	L4/5 IT Glut	up
Lamc3	0.730551	1.11098	2.02537	0.54853	0.583328	0.99994	L4/5 IT Glut	up
Myc	0.472917	1.10749	2.73081	0.405553	0.685071	0.99994	L4/5 IT Glut	up
Rwdd2b	5.70051	1.10411	0.695705	1.58704	0.112502	0.99994	L4/5 IT Glut	up
Dennd1c	0.670568	1.10264	2.05763	0.535879	0.592042	0.99994	L4/5 IT Glut	up
Tmem200b	0.413546	1.10247	2.6595	0.414541	0.678478	0.99994	L4/5 IT Glut	up
Slc39a5	0.587424	1.10221	2.31795	0.47551	0.634424	0.99994	L4/5 IT Glut	up
Pramel7	0.357744	1.10138	2.80335	0.39288	0.69440841908570194	0.99994	L4/5 IT Glut	up
Catsperg2	0.473885	1.09992	2.73366	0.402359	0.687419	0.99994	L4/5 IT Glut	up
Kdr	2.03168	1.09863	1.39415	0.78803	0.430679	0.99994	L4/5 IT Glut	up
Cd84	1.4753	1.097	1.50159	0.730562	0.465047	0.99994	L4/5 IT Glut	up
Cldn11	9.22861	1.09636	0.72987	1.50213	0.133063	0.99994	L4/5 IT Glut	up
Gm36210	0.226795	1.09509	3.14374	0.34834	0.727585	0.99994	L4/5 IT Glut	up
Olfr556	0.226795	1.09509	3.14374	0.34834	0.727585	0.99994	L4/5 IT Glut	up
Drd4	0.226795	1.09509	3.14374	0.34834	0.727585	0.99994	L4/5 IT Glut	up
Il15	0.226795	1.09509	3.14374	0.34834	0.727585	0.99994	L4/5 IT Glut	up
Gm3752	0.226795	1.09509	3.14374	0.34834	0.727585	0.99994	L4/5 IT Glut	up
Knl1	1.78011	1.0945	1.21112	0.903709	0.36615	0.99994	L4/5 IT Glut	up
Tcaf3	1.18952	1.09449	1.58949	0.68858	0.491087	0.99994	L4/5 IT Glut	up
Styk1	1.20315	1.09407	1.42138	0.769727	0.441462	0.99994	L4/5 IT Glut	up
Spsb2	0.887626	1.08911	1.78449	0.610322	0.541649	0.99994	L4/5 IT Glut	up
Krt28	0.825301	1.08837	1.94675	0.559072	0.576113	0.99994	L4/5 IT Glut	up
Rab39	5.26488	1.08575	0.771097	1.40806	0.159113	0.99994	L4/5 IT Glut	up
Arg1	1.1012	1.08393	1.54931	0.699624	0.484162	0.99994	L4/5 IT Glut	up
Ccdc153	0.674473	1.08344	2.00528	0.540292	0.588995	0.99994	L4/5 IT Glut	up
Chrdl2	0.377603	1.08255	2.74415	0.394492	0.693217	0.99994	L4/5 IT Glut	up
Plpp4	1.86762	1.08159	1.26295	0.856394	0.39178	0.99994	L4/5 IT Glut	up
Tmem154	0.461421	1.08035	2.54831	0.423946	0.671605	0.99994	L4/5 IT Glut	up
Ttll10	0.461421	1.08035	2.54831	0.423946	0.671605	0.99994	L4/5 IT Glut	up
Bcl2l10	0.556546	1.07992	2.09646	0.515115	0.606472	0.99994	L4/5 IT Glut	up
Fibcd1	0.523956	1.07931	2.40123	0.449485	0.653082	0.99994	L4/5 IT Glut	up
Ctsc	1.57485	1.07724	1.37297	0.784606	0.432685	0.99994	L4/5 IT Glut	up
Ttc21a	1.64659	1.07571	1.27217	0.845575	0.39779	0.99994	L4/5 IT Glut	up
Sox8	8.94347	1.0745	0.63833	1.68329	0.0923184	0.99994	L4/5 IT Glut	up
Pdyn	2.1191	1.07417	1.14839	0.93537	0.349597	0.99994	L4/5 IT Glut	up
Kcns3	3.99421	1.07232	0.859282	1.24793	0.212057	0.99994	L4/5 IT Glut	up
Col17a1	2.25171	1.07158	1.09509	0.978529	0.327813	0.99994	L4/5 IT Glut	up
Abcb5	0.527436	1.0711	2.62234	0.408453	0.682941	0.99994	L4/5 IT Glut	up
Bpifc	0.571826	1.06883	2.0828	0.513169	0.607833	0.99994	L4/5 IT Glut	up
Cd164l2	4.47565	1.06654	0.840789	1.2685	0.204619	0.99994	L4/5 IT Glut	up
Thbs1	0.766219	1.06097	2.09424	0.506612	0.612427	0.99994	L4/5 IT Glut	up
Trim16	0.810167	1.0608	2.03816	0.520468	0.602738	0.99994	L4/5 IT Glut	up
Soat2	3.27872	1.06056	0.969972	1.09339	0.274222	0.99994	L4/5 IT Glut	up
Cnksr3	0.69276	1.0601	2.33674	0.453665	0.65007	0.99994	L4/5 IT Glut	up
Lrg1	0.654905	1.06004	1.95235	0.542956	0.58716	0.99994	L4/5 IT Glut	up
6330409D20Rik	2.06435	1.05945	1.30185	0.813806	0.415756	0.99994	L4/5 IT Glut	up
Lrrc72	0.880303	1.05905	1.75191	0.604512	0.545503	0.99994	L4/5 IT Glut	up
Cd4	0.877461	1.0568	2.02601	0.521615	0.601939	0.99994	L4/5 IT Glut	up
Cdca7	2.38472	1.05624	1.19215	0.885997	0.375619	0.99994	L4/5 IT Glut	up
Plekhg4	11.8754	1.05608	0.49868	2.11776	0.0341957	0.99994	L4/5 IT Glut	up
Tunar	3.28837	1.05481	0.952857	1.107	0.268295	0.99994	L4/5 IT Glut	up
Gm28710	0.52314	1.05478	2.5954	0.406402	0.684447	0.99994	L4/5 IT Glut	up
Mcidas	0.976032	1.05274	1.85282	0.56818	0.569913	0.99994	L4/5 IT Glut	up
B430218F22Rik	0.596342	1.05071	2.13385	0.492401	0.622436	0.99994	L4/5 IT Glut	up
Tent5a	1.44169	1.04694	1.47036	0.712028	0.476448	0.99994	L4/5 IT Glut	up
Ceacam1	2.13991	1.04679	1.14773	0.912052	0.361741	0.99994	L4/5 IT Glut	up
Hmox1	0.483585	1.04664	2.68217	0.39022	0.696374	0.99994	L4/5 IT Glut	up
Ropn1l	5.44137	1.0466	0.693264	1.50967	0.131129	0.99994	L4/5 IT Glut	up
Armh2	2.3771	1.046	1.13383	0.922539	0.356247	0.99994	L4/5 IT Glut	up
Pdgfra	4.46324	1.04381	0.886298	1.17771	0.238911	0.99994	L4/5 IT Glut	up
Mybpc1	2.81041	1.04192	1.29361	0.805435	0.420569	0.99994	L4/5 IT Glut	up
Usp9y	0.868027	1.04147	1.90137	0.547746	0.583867	0.99994	L4/5 IT Glut	up
Gpsm3	0.511892	1.04026	2.44097	0.426166	0.669987	0.99994	L4/5 IT Glut	up
Gm6569	1.41785	1.0386	1.44278	0.719864	0.471609	0.99994	L4/5 IT Glut	up
Tmem72	0.931884	1.03465	1.76382	0.586599	0.557473	0.99994	L4/5 IT Glut	up
Ttc30a1	3.45959	1.03459	0.915936	1.12954	0.25867	0.99994	L4/5 IT Glut	up
Derl3	1.33834	1.03286	1.43514	0.719694	0.471714	0.99994	L4/5 IT Glut	up
Slc26a5	0.436066	1.02791	2.82891	0.36336	0.716336	0.99994	L4/5 IT Glut	up
Agbl2	1.77662	1.02782	1.40951	0.729206	0.465875	0.99994	L4/5 IT Glut	up
Tcfl5	0.484656	1.02617	2.71901	0.377406	0.705872	0.99994	L4/5 IT Glut	up
Uox	0.799158	1.02415	1.84474	0.555172	0.578777	0.99994	L4/5 IT Glut	up
Myl3	0.967278	1.024	1.74968	0.585248	0.558381	0.99994	L4/5 IT Glut	up
Stab1	1.2952	1.0203	1.56234	0.653061	0.513717	0.99994	L4/5 IT Glut	up
Mertk	5.07006	1.02013	1.01899	1.00112	0.316769	0.99994	L4/5 IT Glut	up
Slc43a1	0.878276	1.01838	1.80234	0.565033	0.572051	0.99994	L4/5 IT Glut	up
Gm13306	1.93027	1.01808	1.19374	0.852851	0.393742	0.99994	L4/5 IT Glut	up
Tac1	1.30901	1.01729	1.52612	0.666587	0.505036	0.99994	L4/5 IT Glut	up
Nrap	2.40701	1.0126	2.52999	0.40024	0.68898	0.99994	L4/5 IT Glut	up
Edaradd	0.444937	1.01096	2.81488	0.359149	0.719483	0.99994	L4/5 IT Glut	up
Col4a6	2.7887	1.00781	0.985468	1.02267	0.306462	0.99994	L4/5 IT Glut	up
Ccnb1	2.92039	1.00705	1.01124	0.995856	0.31932	0.99994	L4/5 IT Glut	up
Vav2	1.49314	1.00688	1.45455	0.692226	0.488796	0.99994	L4/5 IT Glut	up
Esrrb	1.78535	1.00626	1.27757	0.787634	0.430911	0.99994	L4/5 IT Glut	up
Ly6g5b	0.620592	1.00357	2.28088	0.439992	0.659943	0.99994	L4/5 IT Glut	up
Itpripl2	1.51849	1.00103	1.50071	0.66704	0.504746	0.99994	L4/5 IT Glut	up
Dchs2	1.65724	0.997926	1.40073	0.712431	0.476198	0.99994	L4/5 IT Glut	up
Plac8l1	1.51165	0.996972	1.3228	0.753686	0.451038	0.99994	L4/5 IT Glut	up
Asb15	2.2156	0.992679	1.06274	0.934075	0.350265	0.99994	L4/5 IT Glut	up
Mt3	27.8981	0.990962	1.03837	0.954348	0.339908	0.99994	L4/5 IT Glut	up
Dnajc28	5.07964	0.990385	0.733894	1.34949	0.177179	0.99994	L4/5 IT Glut	up
Gja5	0.437465	0.989536	2.8307	0.349573	0.726659	0.99994	L4/5 IT Glut	up
Pcdhgb7	2.6796	0.989344	1.00094	0.988415	0.32295	0.99994	L4/5 IT Glut	up
Wnt7b	4.17195	0.984735	0.907107	1.08558	0.277666	0.99994	L4/5 IT Glut	up
Atg9b	1.06466	0.984403	1.64336	0.599017	0.549162	0.99994	L4/5 IT Glut	up
Pdcl2	2.04519	0.984019	1.18441	0.830811	0.40608	0.99994	L4/5 IT Glut	up
Pla2g4a	4.24496	0.982392	0.844827	1.16283	0.244898	0.99994	L4/5 IT Glut	up
Gm5751	2.21702	0.981027	1.10304	0.889382	0.373798	0.99994	L4/5 IT Glut	up
Nlrp4f	0.39417	0.979724	2.94705	0.332442	0.739555	0.99994	L4/5 IT Glut	up
Tnfrsf17	0.39417	0.979724	2.94705	0.332442	0.739555	0.99994	L4/5 IT Glut	up
Chst14	2.00721	0.979053	1.13598	0.861855	0.388767	0.99994	L4/5 IT Glut	up
Rspo2	58.8434	0.97757	0.231265	4.22705	2.36774884811931e-5	0.132491	L4/5 IT Glut	up
Scd4	3.07913	0.977318	0.973726	1.00369	0.315529	0.99994	L4/5 IT Glut	up
Layn	5.48622	0.975928	0.837378	1.16546	0.243834	0.99994	L4/5 IT Glut	up
Slco1b2	0.513989	0.97448	2.66127	0.366171	0.714237	0.99994	L4/5 IT Glut	up
Gm12184	1.99216	0.973531	1.14726	0.848567	0.396122	0.99994	L4/5 IT Glut	up
Slc4a11	3.0971	0.972121	0.926883	1.04881	0.294267	0.99994	L4/5 IT Glut	up
Cyp2d22	1.1184	0.970719	1.6523	0.587494	0.556872	0.99994	L4/5 IT Glut	up
Hsf3	0.471761	0.969977	2.75392	0.352217	0.724676	0.99994	L4/5 IT Glut	up
Apold1	2.60797	0.968386	1.10977	0.872598	0.382882	0.99994	L4/5 IT Glut	up
Frem2	1.53384	0.967162	1.45843	0.663154	0.507232	0.99994	L4/5 IT Glut	up
Gna15	0.789671	0.96708	1.98796	0.486469	0.626634	0.99994	L4/5 IT Glut	up
Myo1h	2.62091	0.965354	1.09578	0.880971	0.378334	0.99994	L4/5 IT Glut	up
Foxo6	7.04057	0.963832	0.636813	1.51352	0.130147	0.99994	L4/5 IT Glut	up
Thap1	11.6535	0.96133	0.509636	1.88631	0.0592534	0.99994	L4/5 IT Glut	up
Fam129c	5.63479	0.960282	0.703025	1.36593	0.171961	0.99994	L4/5 IT Glut	up
Tmem220	0.782728	0.957894	1.9483	0.491658	0.622961	0.99994	L4/5 IT Glut	up
Rsph4a	1.25813	0.956943	1.4247	0.671679	0.501788	0.99994	L4/5 IT Glut	up
Nepn	0.326313	0.956264	3.1276	0.30575	0.759795	0.99994	L4/5 IT Glut	up
Ms4a2	0.326313	0.956264	3.1276	0.30575	0.759795	0.99994	L4/5 IT Glut	up
Papln	1.36294	0.956217	1.4368	0.665518	0.505719	0.99994	L4/5 IT Glut	up
Fam107b	1.27948	0.955527	1.44621	0.66071	0.508798	0.99994	L4/5 IT Glut	up
Myo1f	1.37746	0.955369	1.58009	0.604628	0.545426	0.99994	L4/5 IT Glut	up
Zmynd15	1.23954	0.954375	1.42089	0.671672	0.501792	0.99994	L4/5 IT Glut	up
Fam180a	0.44029	0.953787	2.78588	0.342364	0.732077	0.99994	L4/5 IT Glut	up
Kcne2	0.615116	0.951942	2.49973	0.380818	0.703338	0.99994	L4/5 IT Glut	up
Nxf3	0.576759	0.951741	2.54449	0.37404	0.708374	0.99994	L4/5 IT Glut	up
Vmn1r24	0.701144	0.949843	1.99191	0.47685	0.633469	0.99994	L4/5 IT Glut	up
Rnd2	1.7969	0.947669	1.43723	0.659369	0.509659	0.99994	L4/5 IT Glut	up
Dpysl5	9.59209	0.94757	0.578687	1.63745	0.101537	0.99994	L4/5 IT Glut	up
Gm6710	6.02342	0.946616	0.661502	1.43101	0.152427	0.99994	L4/5 IT Glut	up
Gm10945	1.14858	0.945957	1.54329	0.612949	0.53991	0.99994	L4/5 IT Glut	up
Socs1	3.08063	0.945722	1.03471	0.913997	0.360719	0.99994	L4/5 IT Glut	up
Gnrh1	4.183	0.945183	0.820847	1.15147	0.249538	0.99994	L4/5 IT Glut	up
Slc38a11	0.742161	0.943424	2.12009	0.444993	0.656325	0.99994	L4/5 IT Glut	up
Cavin1	2.19149	0.943293	1.25065	0.754244	0.450703	0.99994	L4/5 IT Glut	up
Ocstamp	0.513505	0.941485	2.65841	0.354154	0.723224	0.99994	L4/5 IT Glut	up
Dcn	2.68031	0.941318	1.03495	0.909535	0.363068	0.99994	L4/5 IT Glut	up
Nek5	0.361959	0.940915	3.04462	0.309042	0.75729	0.99994	L4/5 IT Glut	up
Usp26	0.47478	0.940737	2.705	0.347778	0.728007	0.99994	L4/5 IT Glut	up
Ms4a4b	0.515491	0.939956	2.44871	0.383858	0.701084	0.99994	L4/5 IT Glut	up
Cdhr4	0.811563	0.937122	1.98283	0.472618	0.636486	0.99994	L4/5 IT Glut	up
Tnfsf13	1.72738	0.93536	1.32838	0.704137	0.481347	0.99994	L4/5 IT Glut	up
Olfr1425	0.922441	0.93307	1.80565	0.516751	0.60533	0.99994	L4/5 IT Glut	up
Kcng2	6.28483	0.932298	0.647609	1.4396	0.14998	0.99994	L4/5 IT Glut	up
Myof	2.58985	0.930811	1.00994	0.921654	0.356709	0.99994	L4/5 IT Glut	up
Gm5901	0.396511	0.929148	2.90092	0.320294	0.748746	0.99994	L4/5 IT Glut	up
Jmjd7	3.81359	0.927437	0.86107	1.07707	0.281447	0.99994	L4/5 IT Glut	up
Fam83e	0.913848	0.927416	1.72171	0.538659	0.590122	0.99994	L4/5 IT Glut	up
4931429L15Rik	2.43672	0.924043	1.08394	0.852487	0.393944	0.99994	L4/5 IT Glut	up
Avp	0.354487	0.922964	3.06758	0.300877	0.763508	0.99994	L4/5 IT Glut	up
Zfp503	1.70361	0.922804	1.18319	0.779926	0.435434	0.99994	L4/5 IT Glut	up
C1rl	1.63712	0.922662	1.38752	0.664974	0.506067	0.99994	L4/5 IT Glut	up
Klhl31	1.46243	0.921814	1.39603	0.660312	0.509054	0.99994	L4/5 IT Glut	up
Psmb11	0.747931	0.9214	2.0315	0.453556	0.650148	0.99994	L4/5 IT Glut	up
Acvrl1	1.42528	0.920235	1.56481	0.588082	0.556477	0.99994	L4/5 IT Glut	up
Zfp383	10.5677	0.91839	0.552439	1.66243	0.0964271	0.99994	L4/5 IT Glut	up
Rrm2	0.727475	0.918363	2.12212	0.432757	0.665191	0.99994	L4/5 IT Glut	up
Tnfrsf25	50.7502	0.917409	0.297048	3.08842	0.00201225	0.99994	L4/5 IT Glut	up
Sv2c	15.2959	0.917076	0.458044	2.00216	0.0452678	0.99994	L4/5 IT Glut	up
Eya1	9.92943	0.913106	0.675947	1.35085	0.176742	0.99994	L4/5 IT Glut	up
Mndal	0.608489	0.908896	2.49381	0.364461	0.715514	0.99994	L4/5 IT Glut	up
Ikzf3	0.561529	0.907751	2.36939	0.383115	0.701634	0.99994	L4/5 IT Glut	up
Hrc	1.42174	0.907022	1.42626	0.635947	0.524811	0.99994	L4/5 IT Glut	up
Pspn	0.426489	0.905915	2.61524	0.346398	0.729044	0.99994	L4/5 IT Glut	up
Cped1	2.82481	0.905667	1.03751	0.872927	0.382703	0.99994	L4/5 IT Glut	up
Gm6525	2.15226	0.905218	1.25968	0.718607	0.472383	0.99994	L4/5 IT Glut	up
Ccdc88b	1.13196	0.904966	1.62992	0.555222	0.578743	0.99994	L4/5 IT Glut	up
Tmem100	1.57537	0.904781	1.2791	0.707356	0.479345	0.99994	L4/5 IT Glut	up
Apoa2	0.414562	0.90475	2.64175	0.342481	0.731989	0.99994	L4/5 IT Glut	up
Scimp	0.490128	0.901677	2.48488	0.362865	0.716706	0.99994	L4/5 IT Glut	up
Rxrg	1.92362	0.896869	1.13725	0.788632	0.430327	0.99994	L4/5 IT Glut	up
Tigd5	2.184	0.896614	1.11844	0.801666	0.422746	0.99994	L4/5 IT Glut	up
Neurog2	0.820892	0.895915	1.77243	0.505472	0.613227	0.99994	L4/5 IT Glut	up
Clspn	0.625753	0.894607	2.02293	0.442232	0.658321	0.99994	L4/5 IT Glut	up
Slc29a3	8.74278	0.890585	0.590826	1.50736	0.13172	0.99994	L4/5 IT Glut	up
Cd24a	2.33116	0.888453	1.16105	0.765215	0.444143	0.99994	L4/5 IT Glut	up
Mapkapk3	2.97503	0.887775	0.965976	0.919045	0.358072	0.99994	L4/5 IT Glut	up
Fndc10	9.52026	0.88451	0.561157	1.57623	0.114974	0.99994	L4/5 IT Glut	up
Ankrd2	0.661541	0.883572	2.11095	0.418566	0.675533	0.99994	L4/5 IT Glut	up
Cntnap3	28.7562	0.882793	0.36195	2.43899	0.0147282	0.99994	L4/5 IT Glut	up
Tmprss9	4.604	0.882203	0.762861	1.15644	0.247501	0.99994	L4/5 IT Glut	up
Asic3	1.09086	0.881669	1.47585	0.597397	0.550242	0.99994	L4/5 IT Glut	up
Cntd1	11.7076	0.879579	0.519281	1.69384	0.090296	0.99994	L4/5 IT Glut	up
Bnipl	11.8402	0.876415	0.482614	1.81598	0.0693742	0.99994	L4/5 IT Glut	up
Cbln1	1.13279	0.873949	1.70421	0.512818	0.608079	0.99994	L4/5 IT Glut	up
Car8	7.01425	0.871526	0.682107	1.2777	0.201356	0.99994	L4/5 IT Glut	up
Mrln	2.41359	0.870624	1.03571	0.840605	0.400569	0.99994	L4/5 IT Glut	up
Npy2r	1.06055	0.870556	1.76371	0.493593	0.621594	0.99994	L4/5 IT Glut	up
Gulp1	2.34462	0.867864	1.30293	0.666088	0.505355	0.99994	L4/5 IT Glut	up
Tbx2	2.29315	0.867574	1.28476	0.675278	0.499499	0.99994	L4/5 IT Glut	up
Ndst4	2.74889	0.865895	1.22083	0.709267	0.478159	0.99994	L4/5 IT Glut	up
Tomt	0.620712	0.865858	2.01948	0.428754	0.668102	0.99994	L4/5 IT Glut	up
Nectin2	5.24248	0.863837	0.756215	1.14232	0.253323	0.99994	L4/5 IT Glut	up
Fam131c	1.08668	0.861168	1.61124	0.534477	0.593012	0.99994	L4/5 IT Glut	up
Tinagl1	0.625292	0.861075	2.00752	0.428924	0.667979	0.99994	L4/5 IT Glut	up
Edn1	0.304265	0.859653	3.13852	0.273904	0.784158	0.99994	L4/5 IT Glut	up
Il1a	0.290434	0.857415	3.14613	0.272531	0.785214	0.99994	L4/5 IT Glut	up
Pdk4	0.290434	0.857415	3.14613	0.272531	0.785214	0.99994	L4/5 IT Glut	up
Tnfaip2	0.290434	0.857415	3.14613	0.272531	0.785214	0.99994	L4/5 IT Glut	up
Hfe	0.290434	0.857415	3.14613	0.272531	0.785214	0.99994	L4/5 IT Glut	up
Vwde	0.290434	0.857415	3.14613	0.272531	0.785214	0.99994	L4/5 IT Glut	up
Muc5b	0.34756	0.857062	3.09249	0.277143	0.78167	0.99994	L4/5 IT Glut	up
Serpinf2	0.34756	0.857062	3.09249	0.277143	0.78167	0.99994	L4/5 IT Glut	up
B4galnt3	63.5398	0.856856	0.24865	3.44604	5.6886725435432e-4	0.649554	L4/5 IT Glut	up
Fcrlb	0.163157	0.854975	3.14601	0.271765	0.785803	0.99994	L4/5 IT Glut	up
P2ry1	0.163157	0.854975	3.14601	0.271765	0.785803	0.99994	L4/5 IT Glut	up
Cdkn2a	0.163157	0.854975	3.14601	0.271765	0.785803	0.99994	L4/5 IT Glut	up
Ube2u	0.163157	0.854975	3.14601	0.271765	0.785803	0.99994	L4/5 IT Glut	up
Dmrtb1	0.163157	0.854975	3.14601	0.271765	0.785803	0.99994	L4/5 IT Glut	up
Padi6	0.163157	0.854975	3.14601	0.271765	0.785803	0.99994	L4/5 IT Glut	up
Zar1	0.163157	0.854975	3.14601	0.271765	0.785803	0.99994	L4/5 IT Glut	up
Dmp1	0.163157	0.854975	3.14601	0.271765	0.785803	0.99994	L4/5 IT Glut	up
Tmem26	0.163157	0.854975	3.14601	0.271765	0.785803	0.99994	L4/5 IT Glut	up
Odf3l2	0.163157	0.854975	3.14601	0.271765	0.785803	0.99994	L4/5 IT Glut	up
Hist1h2ac	0.163157	0.854975	3.14601	0.271765	0.785803	0.99994	L4/5 IT Glut	up
Ptger2	0.163157	0.854975	3.14601	0.271765	0.785803	0.99994	L4/5 IT Glut	up
Has2	0.163157	0.854975	3.14601	0.271765	0.785803	0.99994	L4/5 IT Glut	up
Mafa	0.163157	0.854975	3.14601	0.271765	0.785803	0.99994	L4/5 IT Glut	up
Ccdc154	0.163157	0.854975	3.14601	0.271765	0.785803	0.99994	L4/5 IT Glut	up
Ip6k3	0.163157	0.854975	3.14601	0.271765	0.785803	0.99994	L4/5 IT Glut	up
Ly6g6d	0.163157	0.854975	3.14601	0.271765	0.785803	0.99994	L4/5 IT Glut	up
Six2	0.163157	0.854975	3.14601	0.271765	0.785803	0.99994	L4/5 IT Glut	up
Esx1	0.163157	0.854975	3.14601	0.271765	0.785803	0.99994	L4/5 IT Glut	up
Galnt14	131.169	0.85376	0.241112	3.54093	3.9872144681847e-4	0.557778	L4/5 IT Glut	up
Olfr1156	2.02845	0.853194	1.18375	0.720754	0.471061	0.99994	L4/5 IT Glut	up
Gucy2e	2.07988	0.852316	1.16817	0.729616	0.465625	0.99994	L4/5 IT Glut	up
Cnbd1	0.787254	0.849924	1.96508	0.432513	0.665369	0.99994	L4/5 IT Glut	up
Olfr107	0.538891	0.847371	2.26616	0.373924	0.708461	0.99994	L4/5 IT Glut	up
Stra6	0.322404	0.847034	3.12195	0.271315	0.786148	0.99994	L4/5 IT Glut	up
Adamtsl5	0.397782	0.846192	2.91154	0.290633	0.771332	0.99994	L4/5 IT Glut	up
Ajuba	0.594929	0.844472	2.02947	0.416104	0.677334	0.99994	L4/5 IT Glut	up
AA467197	0.462545	0.842773	2.35639	0.357655	0.720602	0.99994	L4/5 IT Glut	up
Rab32	0.843126	0.841637	1.95569	0.430352	0.66694	0.99994	L4/5 IT Glut	up
Lpar1	19.7045	0.839762	0.374449	2.24266	0.0249189	0.99994	L4/5 IT Glut	up
Scarf2	1.01392	0.839443	1.6294	0.515186	0.606423	0.99994	L4/5 IT Glut	up
Olfr1555-ps1	0.503936	0.838502	2.68187	0.312656	0.754542	0.99994	L4/5 IT Glut	up
Scml2	11.9219	0.838447	0.516996	1.62177	0.104853	0.99994	L4/5 IT Glut	up
Sox18	1.19043	0.838368	1.48817	0.563354	0.573194	0.99994	L4/5 IT Glut	up
Gper1	1.06184	0.838294	1.68176	0.498461	0.618159	0.99994	L4/5 IT Glut	up
Ramp3	4.4063	0.838164	0.838331	0.999801	0.317407	0.99994	L4/5 IT Glut	up
Fam163a	2.06464	0.837918	1.30768	0.640769	0.521673	0.99994	L4/5 IT Glut	up
4930579G24Rik	0.711798	0.837589	1.95188	0.429119	0.667836	0.99994	L4/5 IT Glut	up
S100a1	4.13031	0.837347	1.01488	0.825071	0.409331	0.99994	L4/5 IT Glut	up
Itih5	2.11823	0.837219	1.22312	0.684496	0.493662	0.99994	L4/5 IT Glut	up
Mup6	0.431058	0.837173	2.84194	0.294579	0.768316	0.99994	L4/5 IT Glut	up
Acot1	3.00302	0.837081	0.954833	0.876678	0.380662	0.99994	L4/5 IT Glut	up
Gm13547	1.39967	0.835629	1.39299	0.599882	0.548585	0.99994	L4/5 IT Glut	up
Tcf19	4.77451	0.835348	0.754606	1.107	0.268295	0.99994	L4/5 IT Glut	up
Rab11fip1	1.16446	0.834963	1.54273	0.541224	0.588353	0.99994	L4/5 IT Glut	up
Fndc7	0.363472	0.834254	3.01139	0.277033	0.781755	0.99994	L4/5 IT Glut	up
4930451I11Rik	0.357379	0.834083	3.03544	0.274782	0.783484	0.99994	L4/5 IT Glut	up
Lpar4	0.357379	0.834083	3.03544	0.274782	0.783484	0.99994	L4/5 IT Glut	up
Sox17	0.442045	0.832226	2.78749	0.298557	0.765278	0.99994	L4/5 IT Glut	up
Bmp4	0.442045	0.832226	2.78749	0.298557	0.765278	0.99994	L4/5 IT Glut	up
Gpr4	1.66974	0.831971	1.42747	0.582829	0.560008	0.99994	L4/5 IT Glut	up
Vwa1	7.84863	0.831862	0.608947	1.36607	0.171918	0.99994	L4/5 IT Glut	up
Ano7	0.376072	0.829946	3.12733	0.265385	0.790713	0.99994	L4/5 IT Glut	up
Trim67	0.376072	0.829946	3.12733	0.265385	0.790713	0.99994	L4/5 IT Glut	up
Fam149a	11.8184	0.829642	0.504267	1.64524	0.0999195	0.99994	L4/5 IT Glut	up
Spns3	1.66124	0.829628	1.41014	0.588329	0.556312	0.99994	L4/5 IT Glut	up
Hmmr	1.27182	0.829469	1.60887	0.51556	0.606162	0.99994	L4/5 IT Glut	up
Plod1	3.87664	0.82838	0.877345	0.94419	0.345073	0.99994	L4/5 IT Glut	up
Dnaaf1	1.86355	0.828354	1.24779	0.663856	0.506782	0.99994	L4/5 IT Glut	up
Tmem203	5.78186	0.827454	0.774646	1.06817	0.285444	0.99994	L4/5 IT Glut	up
Isg15	1.95517	0.826666	1.19153	0.693784	0.487818	0.99994	L4/5 IT Glut	up
Igfbp2	5.97166	0.825764	0.728895	1.1329	0.257257	0.99994	L4/5 IT Glut	up
Slc6a16	5.66301	0.824991	0.706545	1.16764	0.242951	0.99994	L4/5 IT Glut	up
Gadd45g	9.01347	0.824896	0.574206	1.43659	0.150836	0.99994	L4/5 IT Glut	up
Lfng	0.813306	0.824157	1.93106	0.426791	0.669532	0.99994	L4/5 IT Glut	up
Slc5a12	6.24279	0.823952	0.708831	1.16241	0.245069	0.99994	L4/5 IT Glut	up
P4ha3	5.67409	0.821242	0.730288	1.1245445409330601	0.260782	0.99994	L4/5 IT Glut	up
Tmem119	1.13686	0.820632	1.72529	0.475648	0.634326	0.99994	L4/5 IT Glut	up
Pzp	1.50735	0.820094	1.41258	0.580566	0.561533	0.99994	L4/5 IT Glut	up
Clec2h	0.246187	0.818847	3.12665	0.261893	0.793404	0.99994	L4/5 IT Glut	up
Enpp1	1.22848	0.818357	1.599	0.511793	0.608796	0.99994	L4/5 IT Glut	up
Bmp2	3.72518	0.817386	0.863826	0.94624	0.344026	0.99994	L4/5 IT Glut	up
Dennd2c	0.349907	0.817346	3.0585	0.267237	0.789286	0.99994	L4/5 IT Glut	up
Cracr2b	0.349907	0.817346	3.0585	0.267237	0.789286	0.99994	L4/5 IT Glut	up
Gm9573	1.9152	0.817026	1.3301	0.614258	0.539045	0.99994	L4/5 IT Glut	up
Arhgap25	4.81787	0.816827	0.761424	1.07276	0.283378	0.99994	L4/5 IT Glut	up
Cdca3	0.47774	0.816147	2.74359	0.297474	0.766105	0.99994	L4/5 IT Glut	up
Nsl1	0.393202	0.814662	2.91939	0.279052	0.780205	0.99994	L4/5 IT Glut	up
Cyp2b13	0.393202	0.814662	2.91939	0.279052	0.780205	0.99994	L4/5 IT Glut	up
Sox1	1.44933	0.814039	1.43235	0.568325	0.569814	0.99994	L4/5 IT Glut	up
Bin2	0.58267	0.814031	2.19845	0.370274	0.711178	0.99994	L4/5 IT Glut	up
Trpm8	0.383332	0.813925	2.94541	0.276337	0.78229	0.99994	L4/5 IT Glut	up
Has3	4.19454	0.813303	0.861888	0.94363	0.345359	0.99994	L4/5 IT Glut	up
Rasl10a	6.68996	0.811597	0.690388	1.17557	0.239769	0.99994	L4/5 IT Glut	up
Tex45	0.498852	0.811406	2.31484	0.350524	0.725945	0.99994	L4/5 IT Glut	up
Sost	0.463029	0.809843	2.34485	0.345371	0.729816	0.99994	L4/5 IT Glut	up
Ube2c	0.738723	0.808957	1.96501	0.41168	0.680574	0.99994	L4/5 IT Glut	up
Pnoc	0.618719	0.808417	2.43202	0.332406	0.739583	0.99994	L4/5 IT Glut	up
Ptger1	4.35478	0.80689	0.805296	1.00198	0.316354	0.99994	L4/5 IT Glut	up
Sox30	2.04059	0.805905	1.14956	0.701054	0.483269	0.99994	L4/5 IT Glut	up
Fzd10	0.314448	0.804577	3.11655	0.258162	0.796282	0.99994	L4/5 IT Glut	up
Nodal	0.314448	0.804577	3.11655	0.258162	0.796282	0.99994	L4/5 IT Glut	up
Rhoc	3.62975	0.803288	1.03083	0.779262	0.435825	0.99994	L4/5 IT Glut	up
Aurka	0.858262	0.803258	1.7893	0.448922	0.653488	0.99994	L4/5 IT Glut	up
Smco1	1.65715	0.803031	1.23191	0.65186	0.514491	0.99994	L4/5 IT Glut	up
Pars2	4.93266	0.801786	0.786896	1.01892	0.30824	0.99994	L4/5 IT Glut	up
Abca16	0.838279	0.80155	1.69933	0.471685	0.637151	0.99994	L4/5 IT Glut	up
Tll2	0.624276	0.801185	2.28316	0.350911	0.725655	0.99994	L4/5 IT Glut	up
Tnfrsf13b	0.624808	0.800606	2.15473	0.371557	0.710223	0.99994	L4/5 IT Glut	up
Chst5	0.672018	0.800393	2.20703	0.362656	0.716862	0.99994	L4/5 IT Glut	up
Hist4h4	1.57951	0.799464	1.35666	0.58929	0.555667	0.99994	L4/5 IT Glut	up
Erfe	1.25275	0.799137	1.80007	0.443948	0.65708	0.99994	L4/5 IT Glut	up
Tlr2	0.250715	0.798038	3.1393	0.254209	0.799334	0.99994	L4/5 IT Glut	up
Hcar1	0.250715	0.798038	3.1393	0.254209	0.799334	0.99994	L4/5 IT Glut	up
Selenov	0.250715	0.798038	3.1393	0.254209	0.799334	0.99994	L4/5 IT Glut	up
Kctd11	0.250715	0.798038	3.1393	0.254209	0.799334	0.99994	L4/5 IT Glut	up
Ccl9	0.250715	0.798038	3.1393	0.254209	0.799334	0.99994	L4/5 IT Glut	up
Tfap2a	0.250715	0.798038	3.1393	0.254209	0.799334	0.99994	L4/5 IT Glut	up
Cyp2c55	0.250715	0.798038	3.1393	0.254209	0.799334	0.99994	L4/5 IT Glut	up
Pax1	0.250715	0.798038	3.1393	0.254209	0.799334	0.99994	L4/5 IT Glut	up
Vmn1r39	0.250715	0.798038	3.1393	0.254209	0.799334	0.99994	L4/5 IT Glut	up
Adam29	0.250715	0.798038	3.1393	0.254209	0.799334	0.99994	L4/5 IT Glut	up
Fgf18	0.650944	0.798028	2.12792	0.37502705969253203	0.70764	0.99994	L4/5 IT Glut	up
Cmklr1	0.495235	0.797973	2.47322	0.322645	0.746964	0.99994	L4/5 IT Glut	up
Otog	0.370399	0.796991	3.02151	0.263772	0.791955	0.99994	L4/5 IT Glut	up
Gm5592	0.54401	0.796648	2.22384	0.358231	0.72017	0.99994	L4/5 IT Glut	up
Serhl	0.54401	0.796648	2.22384	0.358231	0.72017	0.99994	L4/5 IT Glut	up
Scara3	2.73491	0.796505	1.20747	0.659646	0.509481	0.99994	L4/5 IT Glut	up
Gm6133	0.567091	0.796159	2.55909	0.31111	0.755717	0.99994	L4/5 IT Glut	up
Olfr70	0.64113	0.795817	2.23783	0.35562	0.722125	0.99994	L4/5 IT Glut	up
Gjc3	0.834764	0.794746	2.00285	0.396808	0.691509	0.99994	L4/5 IT Glut	up
Rgs21	1.012	0.79427	1.7932	0.442935	0.657813	0.99994	L4/5 IT Glut	up
Gfy	0.413062	0.793436	2.85984	0.27744	0.781442	0.99994	L4/5 IT Glut	up
Slc7a10	0.558874	0.791017	2.36734	0.334138	0.738275	0.99994	L4/5 IT Glut	up
C1qtnf1	0.401523	0.790949	2.90218	0.272537	0.78521	0.99994	L4/5 IT Glut	up
Tnnc1	48.8325	0.789534	0.269368	2.93106	0.00337807	0.99994	L4/5 IT Glut	up
Klk6	0.276285	0.788703	3.14246	0.250982	0.801828	0.99994	L4/5 IT Glut	up
Trim5	0.577144	0.788095	2.52571	0.312029	0.755018	0.99994	L4/5 IT Glut	up
Tmem239	0.164124	0.787916	3.1384	0.251056	0.801771	0.99994	L4/5 IT Glut	up
Nlrp6	0.164124	0.787916	3.1384	0.251056	0.801771	0.99994	L4/5 IT Glut	up
Jsrp1	0.164124	0.787916	3.1384	0.251056	0.801771	0.99994	L4/5 IT Glut	up
Zic2	0.164124	0.787916	3.1384	0.251056	0.801771	0.99994	L4/5 IT Glut	up
Wnt11	0.164124	0.787916	3.1384	0.251056	0.801771	0.99994	L4/5 IT Glut	up
Fcgbp	0.164124	0.787916	3.1384	0.251056	0.801771	0.99994	L4/5 IT Glut	up
Rufy4	0.164124	0.787916	3.1384	0.251056	0.801771	0.99994	L4/5 IT Glut	up
Slc22a20	0.164124	0.787916	3.1384	0.251056	0.801771	0.99994	L4/5 IT Glut	up
Plac8	0.164124	0.787916	3.1384	0.251056	0.801771	0.99994	L4/5 IT Glut	up
Fbxw13	0.164124	0.787916	3.1384	0.251056	0.801771	0.99994	L4/5 IT Glut	up
Ccdc42	0.164124	0.787916	3.1384	0.251056	0.801771	0.99994	L4/5 IT Glut	up
Olfr411	0.164124	0.787916	3.1384	0.251056	0.801771	0.99994	L4/5 IT Glut	up
Klrg1	1.56488	0.786083	1.31671	0.597007	0.550503	0.99994	L4/5 IT Glut	up
Colca2	0.436981	0.785993	2.81109	0.279605	0.779781	0.99994	L4/5 IT Glut	up
Sp7	0.436981	0.785993	2.81109	0.279605	0.779781	0.99994	L4/5 IT Glut	up
Frmd7	0.436981	0.785993	2.81109	0.279605	0.779781	0.99994	L4/5 IT Glut	up
Maml3	1647.66	0.784852	0.115405	6.80088	1.03985606354896e-11	1.74560637387963e-7	L4/5 IT Glut	up
Mad2l1	14.1316	0.784606	0.47085	1.66636	0.0956414	0.99994	L4/5 IT Glut	up
Gm867	0.851719	0.78415	1.87183	0.418921	0.675274	0.99994	L4/5 IT Glut	up
Gm10260	0.312705	0.784035	3.11061	0.252052	0.801001	0.99994	L4/5 IT Glut	up
E330021D16Rik	0.312705	0.784035	3.11061	0.252052	0.801001	0.99994	L4/5 IT Glut	up
Tns1	12.8466	0.781381	0.450477	1.73456	0.0828183	0.99994	L4/5 IT Glut	up
Eya4	9.9925	0.781154	0.654597	1.19334	0.232738	0.99994	L4/5 IT Glut	up
Hal	0.352809	0.779889	3.0858	0.252735	0.800473	0.99994	L4/5 IT Glut	up
Pcdhb13	4.45118	0.779813	0.78215	0.997013	0.318758	0.99994	L4/5 IT Glut	up
Rtl10	0.422358	0.779501	2.87226	0.27139	0.786091	0.99994	L4/5 IT Glut	up
Lrrc23	10.9388	0.778352	0.536656	1.45037	0.146954	0.99994	L4/5 IT Glut	up
Mtbp	17.3424	0.778199	0.397578	1.95735	0.0503066	0.99994	L4/5 IT Glut	up
B4galnt2	2.85935	0.777898	1.07086	0.726424	0.467579	0.99994	L4/5 IT Glut	up
Gm21119	1.94804	0.777766	1.2195	0.637777	0.523619	0.99994	L4/5 IT Glut	up
Tcerg1l	21.5606	0.77504	0.448501	1.72807	0.0839757	0.99994	L4/5 IT Glut	up
Vat1	2.00095	0.774728	1.14969	0.673861	0.5004	0.99994	L4/5 IT Glut	up
1700016K19Rik	1.24463	0.774037	1.63871	0.472345	0.63668	0.99994	L4/5 IT Glut	up
Rp1	2.0897	0.772582	1.1939	0.647105	0.517564	0.99994	L4/5 IT Glut	up
Fam50b	0.447671	0.771959	3.11403	0.247898	0.804214	0.99994	L4/5 IT Glut	up
Gpr171	8.35542	0.771311	0.613741	1.25674	0.208849	0.99994	L4/5 IT Glut	up
Amigo2	1.83766	0.770168	1.19736	0.643222	0.52008	0.99994	L4/5 IT Glut	up
Lhx4	0.683931	0.769378	2.07538	0.370716	0.710849	0.99994	L4/5 IT Glut	up
Clec1a	0.852495	0.769083	2.04955	0.37524433729928097	0.707479	0.99994	L4/5 IT Glut	up
Bard1	1.98667	0.76898	1.24293	0.618685	0.536124	0.99994	L4/5 IT Glut	up
Sox7	1.07056	0.768809	1.76911	0.434574	0.663872	0.99994	L4/5 IT Glut	up
Ihh	0.520723	0.768532	2.28763	0.335952	0.736907	0.99994	L4/5 IT Glut	up
Trim71	26.2182	0.768306	0.337082	2.27929	0.02265	0.99994	L4/5 IT Glut	up
Ms4a6b	1.05459	0.76758	1.65549	0.463658	0.642893	0.99994	L4/5 IT Glut	up
Smagp	0.623248	0.767455	2.42708	0.316205	0.751847	0.99994	L4/5 IT Glut	up
Hacl1	5.0526	0.767231	0.747503	1.02639	0.304707	0.99994	L4/5 IT Glut	up
Rhbdf1	19.0978	0.766982	0.380711	2.01461	0.043946	0.99994	L4/5 IT Glut	up
Atp7b	9.44958	0.764311	0.538848	1.41842	0.156069	0.99994	L4/5 IT Glut	up
Rbp7	0.8351	0.76395	1.74486	0.437828	0.661511	0.99994	L4/5 IT Glut	up
C2cd4c	10.5569	0.763216	0.500208	1.5258	0.127061	0.99994	L4/5 IT Glut	up
Asprv1	6.6102	0.761437	0.660298	1.15317	0.248839	0.99994	L4/5 IT Glut	up
Rhpn1	5.24472	0.761328	0.778389	0.978082	0.328034	0.99994	L4/5 IT Glut	up
Gbp5	0.722759	0.761048	2.01969	0.376815	0.706311	0.99994	L4/5 IT Glut	up
Gm45194	2.61775	0.760919	1.24592	0.610729	0.541379	0.99994	L4/5 IT Glut	up
Dusp2	2.16225	0.757198	1.0994	0.688736	0.490989	0.99994	L4/5 IT Glut	up
Mfge8	1.11516	0.75448	1.93171	0.390577	0.69611	0.99994	L4/5 IT Glut	up
Syt6	1.11213	0.754113	2.08909	0.360976	0.718117	0.99994	L4/5 IT Glut	up
C1qtnf7	1.03074	0.752645	1.66235	0.452759	0.650723	0.99994	L4/5 IT Glut	up
Nphs1	0.931505	0.751977	1.75988	0.427289	0.669169	0.99994	L4/5 IT Glut	up
Cacna2d2	1.85786	0.751829	1.42342	0.528186	0.59737	0.99994	L4/5 IT Glut	up
Cyp1b1	0.454869	0.751346	2.76715	0.271523	0.785989	0.99994	L4/5 IT Glut	up
Sdcbp2	4.37816	0.750578	0.772318	0.97185	0.331125	0.99994	L4/5 IT Glut	up
Bhlha9	2.7425	0.749976	1.06744	0.702592	0.48231	0.99994	L4/5 IT Glut	up
Sapcd2	0.268603	0.749777	3.12305	0.240078	0.810269	0.99994	L4/5 IT Glut	up
Hspg2	0.268603	0.749777	3.12305	0.240078	0.810269	0.99994	L4/5 IT Glut	up
Icosl	0.268603	0.749777	3.12305	0.240078	0.810269	0.99994	L4/5 IT Glut	up
Hsd3b7	4.89883	0.749442	0.763216	0.981952	0.326124	0.99994	L4/5 IT Glut	up
Gtsf1	1.49933	0.749385	1.37965	0.543172	0.587012	0.99994	L4/5 IT Glut	up
Tmem17	16.949	0.749152	0.415672	1.80227	0.0715034	0.99994	L4/5 IT Glut	up
Draxin	1.38634	0.747534	1.53024	0.488508	0.62519	0.99994	L4/5 IT Glut	up
Tk1	1.2734	0.746308	1.48355	0.503055	0.614926	0.99994	L4/5 IT Glut	up
Mettl21e	0.557414	0.74546	2.2305	0.334213	0.738219	0.99994	L4/5 IT Glut	up
Pgghg	0.329393	0.744981	3.12068	0.238724	0.81132	0.99994	L4/5 IT Glut	up
Gm2a	12.4971	0.743414	0.513419	1.44797	0.147626	0.99994	L4/5 IT Glut	up
Snai3	4.62399	0.740685	0.820073	0.903193	0.366423	0.99994	L4/5 IT Glut	up
Vmn2r27	2.0503	0.739993	1.33761	0.553223	0.580111	0.99994	L4/5 IT Glut	up
Vtcn1	1.75833	0.73984	1.39616	0.529909	0.596175	0.99994	L4/5 IT Glut	up
Jag1	1.03702	0.739299	1.58631	0.466049	0.641181	0.99994	L4/5 IT Glut	up
Olfr374	0.470388	0.737629	2.38265	0.309583	0.756878	0.99994	L4/5 IT Glut	up
Tshr	1.77201	0.735249	1.4302	0.514088	0.60719	0.99994	L4/5 IT Glut	up
Nrp1	68.5407	0.733224	0.216887	3.38067	7.2309420765061e-4	0.714034	L4/5 IT Glut	up
Pmaip1	0.978802	0.731337	1.65876	0.440893	0.659291	0.99994	L4/5 IT Glut	up
Grhl3	1.44603	0.728922	1.35984	0.536034	0.591935	0.99994	L4/5 IT Glut	up
1700029I15Rik	2.5512	0.727016	1.03273	0.703972	0.48145	0.99994	L4/5 IT Glut	up
Yif1a	5.34894	0.726653	0.724371	1.00315	0.315789	0.99994	L4/5 IT Glut	up
Sertad1	22.2085	0.726146	0.369639	1.96447	0.0494753	0.99994	L4/5 IT Glut	up
Tmprss11c	0.179069	0.724433	3.13364	0.23118	0.817175	0.99994	L4/5 IT Glut	up
Dsp	0.179069	0.724433	3.13364	0.23118	0.817175	0.99994	L4/5 IT Glut	up
Kbtbd6	0.179069	0.724433	3.13364	0.23118	0.817175	0.99994	L4/5 IT Glut	up
Gm10053	0.179069	0.724433	3.13364	0.23118	0.817175	0.99994	L4/5 IT Glut	up
Fcrl6	0.179069	0.724433	3.13364	0.23118	0.817175	0.99994	L4/5 IT Glut	up
Fam187a	0.179069	0.724433	3.13364	0.23118	0.817175	0.99994	L4/5 IT Glut	up
Gm364	0.179069	0.724433	3.13364	0.23118	0.817175	0.99994	L4/5 IT Glut	up
8030474K03Rik	0.179069	0.724433	3.13364	0.23118	0.817175	0.99994	L4/5 IT Glut	up
Cpt1b	7.70597	0.723405	0.587395	1.23155	0.218118	0.99994	L4/5 IT Glut	up
Nudt22	1.8619	0.723008	1.39629	0.517808	0.604592	0.99994	L4/5 IT Glut	up
St8sia2	12.4407	0.722743	0.492302	1.46809	0.14208	0.99994	L4/5 IT Glut	up
Igsf3	90.326	0.722419	0.201912	3.57789	3.4638512628184e-4	0.557778	L4/5 IT Glut	up
Csf2rb	0.413694	0.722402	2.86959	0.251744	0.801239	0.99994	L4/5 IT Glut	up
Foxa3	0.465256	0.721486	2.71034	0.266198	0.790087	0.99994	L4/5 IT Glut	up
Kcng1	7.65796	0.720874	0.60441	1.19269	0.23299	0.99994	L4/5 IT Glut	up
Lgals12	6.05831	0.720063	0.651551	1.10515	0.269094	0.99994	L4/5 IT Glut	up
Nppc	8.686	0.719775	0.593124	1.21353	0.224926	0.99994	L4/5 IT Glut	up
Tbx18	0.782852	0.719573	1.95316	0.368416	0.712563	0.99994	L4/5 IT Glut	up
Arhgap31	32.984	0.719128	0.344724	2.0861	0.0369695	0.99994	L4/5 IT Glut	up
Card10	2.48015	0.718659	1.0637	0.675619	0.499283	0.99994	L4/5 IT Glut	up
Pdpn	0.579468	0.718505	2.49205	0.288319	0.773102	0.99994	L4/5 IT Glut	up
Fam186b	4.73074	0.718403	0.748629	0.959625	0.337244	0.99994	L4/5 IT Glut	up
Colec12	2.66885	0.716596	1.05187	0.681257	0.495709	0.99994	L4/5 IT Glut	up
3110070M22Rik	0.487673	0.716569	2.7195	0.263493	0.792171	0.99994	L4/5 IT Glut	up
Ptpn14	4.15666	0.716341	0.878061	0.815821	0.414603	0.99994	L4/5 IT Glut	up
Calcr	0.329876	0.715237	3.10598	0.230277	0.817876	0.99994	L4/5 IT Glut	up
Kpna7	1.35616	0.715033	1.60369	0.445868	0.655693	0.99994	L4/5 IT Glut	up
Dnaic1	34.7849	0.714243	0.283264	2.52147	0.0116865	0.99994	L4/5 IT Glut	up
Emilin1	0.6627	0.71348	2.0536	0.347429	0.728269	0.99994	L4/5 IT Glut	up
Gpr84	0.365335	0.712542	3.01773	0.236118	0.813341	0.99994	L4/5 IT Glut	up
Adamts7	0.490247	0.712516	2.34624	0.303684	0.761369	0.99994	L4/5 IT Glut	up
Tap1	1.11583	0.71059	1.55104	0.458139	0.646852	0.99994	L4/5 IT Glut	up
Syne3	7.87132	0.710377	0.580116	1.22454	0.220748	0.99994	L4/5 IT Glut	up
Myocd	1.0735	0.709304	1.95288	0.363208	0.716449	0.99994	L4/5 IT Glut	up
Stk17b	1.98693	0.709006	1.21333	0.584348	0.558986	0.99994	L4/5 IT Glut	up
Myl4	12.1135	0.708516	0.467933	1.51414	0.12999	0.99994	L4/5 IT Glut	up
Dnd1	5.39114	0.705287	0.750372	0.939916	0.34726	0.99994	L4/5 IT Glut	up
Fign	7.27991	0.705211	0.760273	0.927576	0.353628	0.99994	L4/5 IT Glut	up
Hmga1	5.12249	0.703531	0.711525	0.988766	0.322778	0.99994	L4/5 IT Glut	up
Adamts4	0.726072	0.702509	2.16107	0.325075	0.745125	0.99994	L4/5 IT Glut	up
CAAA01147332.1	1.33528	0.700914	1.5352	0.456563	0.647985	0.99994	L4/5 IT Glut	up
Lad1	0.523843	0.70072	2.29152	0.305788	0.759766	0.99994	L4/5 IT Glut	up
Slc22a6	0.778271	0.700412	1.95459	0.358341	0.720088	0.99994	L4/5 IT Glut	up
Pcdhac2	2.85442	0.700131	0.998143	0.701433	0.483033	0.99994	L4/5 IT Glut	up
Lrrc37a	1.12819	0.699397	1.70464	0.41029	0.681593	0.99994	L4/5 IT Glut	up
Arhgef15	12.8527	0.699155	0.481042	1.45342	0.146108	0.99994	L4/5 IT Glut	up
Hapln1	4.40443	0.698275	0.873879	0.799053	0.42426	0.99994	L4/5 IT Glut	up
Shmt1	4.18841	0.696742	0.818846	0.850883	0.394834	0.99994	L4/5 IT Glut	up
Pcdhgb2	2.28069	0.694685	1.13783	0.610534	0.541508	0.99994	L4/5 IT Glut	up
Tbata	5.84667	0.694645	0.696087	0.997929	0.318314	0.99994	L4/5 IT Glut	up
Mybph	1.92136	0.692134	1.22495	0.565029	0.572054	0.99994	L4/5 IT Glut	up
Btd	4.46368	0.691968	0.83675	0.826971	0.408253	0.99994	L4/5 IT Glut	up
Oprk1	7.45811	0.689469	0.606787	1.13626	0.255847	0.99994	L4/5 IT Glut	up
Clba1	10.8475	0.689315	0.487827	1.41303	0.157647	0.99994	L4/5 IT Glut	up
Fcna	0.834124	0.688037	1.93941	0.354766	0.722765	0.99994	L4/5 IT Glut	up
Pcdhb10	2.83226	0.686884	0.962429	0.713698	0.475414	0.99994	L4/5 IT Glut	up
Fam20a	7.38735	0.686831	0.679073	1.01142	0.311813	0.99994	L4/5 IT Glut	up
Shisal2b	0.826299	0.686407	1.75429	0.391273	0.695595	0.99994	L4/5 IT Glut	up
Mpzl2	1.06368	0.686322	1.7511	0.391937	0.695105	0.99994	L4/5 IT Glut	up
Gdf9	2.18598	0.686215	1.08339	0.633397	0.526474	0.99994	L4/5 IT Glut	up
Sept1	18.7311	0.685938	0.395318	1.73515	0.0827136	0.99994	L4/5 IT Glut	up
Ctxn2	7.20135	0.685421	0.607135	1.12894	0.258922	0.99994	L4/5 IT Glut	up
Sctr	0.450385	0.684974	2.79449	0.245116	0.806367	0.99994	L4/5 IT Glut	up
Nhlrc1	3.59338	0.684853	0.897994	0.762648	0.445674	0.99994	L4/5 IT Glut	up
Msh5	0.873899	0.684537	1.76133	0.388649	0.697536	0.99994	L4/5 IT Glut	up
Meiob	1.63797	0.684018	1.33799	0.51122767560748394	0.609192	0.99994	L4/5 IT Glut	up
Rgs18	1.57628	0.682033	1.35593	0.502999	0.614965	0.99994	L4/5 IT Glut	up
Trem2	1.61891	0.681835	1.26636	0.538421	0.590287	0.99994	L4/5 IT Glut	up
Cenpf	3.6965	0.681404	0.89849	0.758388	0.448219	0.99994	L4/5 IT Glut	up
Lancl3	1.35171	0.680925	1.36533	0.498726	0.617972	0.99994	L4/5 IT Glut	up
Thegl	1.69684	0.680497	1.27843	0.532291	0.594524	0.99994	L4/5 IT Glut	up
Tnfrsf11b	5.7831	0.680312	0.667639	1.01898	0.308211	0.99994	L4/5 IT Glut	up
Fst	7.02202	0.680295	0.694988	0.978858	0.32765	0.99994	L4/5 IT Glut	up
Sbk2	0.613216	0.680179	2.147	0.316805	0.751392	0.99994	L4/5 IT Glut	up
Cox7a1	0.464289	0.68003	2.73303	0.248819	0.803501	0.99994	L4/5 IT Glut	up
Nudt15	2.3325	0.679563	1.17181	0.579927	0.561964	0.99994	L4/5 IT Glut	up
Nr2e1	2.56573	0.679534	1.01803	0.667498	0.504454	0.99994	L4/5 IT Glut	up
Apobr	0.363795	0.678478	3.03827	0.223311	0.823294	0.99994	L4/5 IT Glut	up
Cldn1	1.02049	0.676939	1.67041	0.405253	0.685292	0.99994	L4/5 IT Glut	up
Siglech	1.77543	0.676822	1.40262	0.482542	0.629421	0.99994	L4/5 IT Glut	up
Rnf17	30.4144	0.676467	0.314511	2.15085	0.031488	0.99994	L4/5 IT Glut	up
Ccdc63	2.06141	0.676277	1.10272	0.613282	0.53969	0.99994	L4/5 IT Glut	up
Ctu1	4.71519	0.675659	0.750111	0.900746	0.367724	0.99994	L4/5 IT Glut	up
Olfr689	1.62311	0.675157	1.38566	0.487246	0.626084	0.99994	L4/5 IT Glut	up
Dusp4	11.1173	0.673308	0.515316	1.30659	0.191351	0.99994	L4/5 IT Glut	up
Maff	3.56828	0.67297	0.880693	0.764136	0.444786	0.99994	L4/5 IT Glut	up
Gm13420	1.48571	0.672719	1.36286	0.493608	0.621583	0.99994	L4/5 IT Glut	up
Pde9a	4.90778	0.672128	0.788325	0.852602	0.39388	0.99994	L4/5 IT Glut	up
Lipk	1.57293	0.672112	1.3992	0.480355	0.630975	0.99994	L4/5 IT Glut	up
Prps1l3	3.35624	0.671858	0.892951	0.752402	0.451809	0.99994	L4/5 IT Glut	up
Sphk1	1.38578	0.671594	1.50017	0.447679	0.654385	0.99994	L4/5 IT Glut	up
Mybpc3	3.34827	0.67099	0.919547	0.729696	0.465576	0.99994	L4/5 IT Glut	up
Aldh1b1	1.01953	0.668349	1.70254	0.392559	0.694645	0.99994	L4/5 IT Glut	up
Pim1	12.7353	0.666043	0.501845	1.32719	0.184446	0.99994	L4/5 IT Glut	up
Sccpdh	30.1145	0.665782	0.315985	2.107	0.0351172	0.99994	L4/5 IT Glut	up
4930523C07Rik	1.02109	0.665542	1.71899	0.38717	0.69863	0.99994	L4/5 IT Glut	up
Fcer1g	1.7937	0.664975	1.17373	0.56655	0.57102	0.99994	L4/5 IT Glut	up
Cdkn1a	26.3073	0.664653	0.342994	1.9378	0.0526479	0.99994	L4/5 IT Glut	up
Ddah1	56.4236	0.664423	0.311432	2.13344	0.0328885	0.99994	L4/5 IT Glut	up
Rtl8c	0.671052	0.662772	2.20944	0.299973	0.764198	0.99994	L4/5 IT Glut	up
Zfp11	12.8988	0.662016	0.449033	1.47432	0.140397	0.99994	L4/5 IT Glut	up
Card19	5.57146	0.661849	0.729162	0.907684	0.364045	0.99994	L4/5 IT Glut	up
Nkd1	1.88868	0.661188	1.16	0.569988	0.568686	0.99994	L4/5 IT Glut	up
Olfr684	0.526066	0.659322	2.64089	0.249659	0.802851	0.99994	L4/5 IT Glut	up
Gm16181	0.303497	0.658009	3.1487	0.208978	0.834465	0.99994	L4/5 IT Glut	up
Gm10549	0.850679	0.657688	1.8142	0.362522	0.716962	0.99994	L4/5 IT Glut	up
Pdgfrb	1.36414	0.65664	1.46862	0.447113	0.654794	0.99994	L4/5 IT Glut	up
Il2ra	0.239858	0.656234	3.14851	0.208427	0.834896	0.99994	L4/5 IT Glut	up
Rhbdf2	0.239858	0.656234	3.14851	0.208427	0.834896	0.99994	L4/5 IT Glut	up
Ccnb1ip1	1.94363	0.655914	1.16045	0.565223	0.571922	0.99994	L4/5 IT Glut	up
Jchain	5.64187	0.655689	0.725458	0.903828	0.366087	0.99994	L4/5 IT Glut	up
Serpina10	1.46261	0.65476	1.43551	0.456118	0.648305	0.99994	L4/5 IT Glut	up
Calcb	1.20327	0.65435	1.65972	0.394253	0.693395	0.99994	L4/5 IT Glut	up
Kdelr3	1.44041	0.653728	1.35612	0.482056	0.629766	0.99994	L4/5 IT Glut	up
Cfb	0.953211	0.653135	1.80548	0.361751	0.717538	0.99994	L4/5 IT Glut	up
Aoc2	5.45326	0.652544	0.758747	0.860028	0.389773	0.99994	L4/5 IT Glut	up
Gm10309	5.68077	0.65148	0.718216	0.907081	0.364364	0.99994	L4/5 IT Glut	up
Chst7	1.0141	0.650901	1.82525	0.35661	0.721384	0.99994	L4/5 IT Glut	up
Stard8	115.519	0.649307	0.198966	3.26341	0.00110082	0.923969	L4/5 IT Glut	up
Prkag3	0.0895343	0.649196	3.16043	0.205414	0.837249	0.99994	L4/5 IT Glut	up
Il1f5	0.0895343	0.649196	3.16043	0.205414	0.837249	0.99994	L4/5 IT Glut	up
Acnat2	0.0895343	0.649196	3.16043	0.205414	0.837249	0.99994	L4/5 IT Glut	up
Calr4	0.0895343	0.649196	3.16043	0.205414	0.837249	0.99994	L4/5 IT Glut	up
Pth2	0.0895343	0.649196	3.16043	0.205414	0.837249	0.99994	L4/5 IT Glut	up
Il21r	0.0895343	0.649196	3.16043	0.205414	0.837249	0.99994	L4/5 IT Glut	up
F7	0.0895343	0.649196	3.16043	0.205414	0.837249	0.99994	L4/5 IT Glut	up
Zic4	0.0895343	0.649196	3.16043	0.205414	0.837249	0.99994	L4/5 IT Glut	up
Ccl12	0.0895343	0.649196	3.16043	0.205414	0.837249	0.99994	L4/5 IT Glut	up
Gpr65	0.0895343	0.649196	3.16043	0.205414	0.837249	0.99994	L4/5 IT Glut	up
Rp1l1	0.0895343	0.649196	3.16043	0.205414	0.837249	0.99994	L4/5 IT Glut	up
Lama1	0.0895343	0.649196	3.16043	0.205414	0.837249	0.99994	L4/5 IT Glut	up
Epcam	0.0895343	0.649196	3.16043	0.205414	0.837249	0.99994	L4/5 IT Glut	up
Tesmin	0.0895343	0.649196	3.16043	0.205414	0.837249	0.99994	L4/5 IT Glut	up
Uba1y	0.0895343	0.649196	3.16043	0.205414	0.837249	0.99994	L4/5 IT Glut	up
Tfap2c	0.0895343	0.649196	3.16043	0.205414	0.837249	0.99994	L4/5 IT Glut	up
Lyzl6	0.0895343	0.649196	3.16043	0.205414	0.837249	0.99994	L4/5 IT Glut	up
H2-Oa	0.0895343	0.649196	3.16043	0.205414	0.837249	0.99994	L4/5 IT Glut	up
Gnat2	0.0895343	0.649196	3.16043	0.205414	0.837249	0.99994	L4/5 IT Glut	up
Tmem211	0.0895343	0.649196	3.16043	0.205414	0.837249	0.99994	L4/5 IT Glut	up
Klri1	0.0895343	0.649196	3.16043	0.205414	0.837249	0.99994	L4/5 IT Glut	up
Rnase6	0.0895343	0.649196	3.16043	0.205414	0.837249	0.99994	L4/5 IT Glut	up
Gm10188	0.0895343	0.649196	3.16043	0.205414	0.837249	0.99994	L4/5 IT Glut	up
Capn8	0.0895343	0.649196	3.16043	0.205414	0.837249	0.99994	L4/5 IT Glut	up
Tmem210	0.0895343	0.649196	3.16043	0.205414	0.837249	0.99994	L4/5 IT Glut	up
Astl	0.0895343	0.649196	3.16043	0.205414	0.837249	0.99994	L4/5 IT Glut	up
2210418O10Rik	0.0895343	0.649196	3.16043	0.205414	0.837249	0.99994	L4/5 IT Glut	up
Ghsr	0.0895343	0.649196	3.16043	0.205414	0.837249	0.99994	L4/5 IT Glut	up
Cxcl15	0.0895343	0.649196	3.16043	0.205414	0.837249	0.99994	L4/5 IT Glut	up
Gp9	0.0895343	0.649196	3.16043	0.205414	0.837249	0.99994	L4/5 IT Glut	up
Vmn2r51	0.0895343	0.649196	3.16043	0.205414	0.837249	0.99994	L4/5 IT Glut	up
Vmn2r73	0.0895343	0.649196	3.16043	0.205414	0.837249	0.99994	L4/5 IT Glut	up
5830411N06Rik	0.0895343	0.649196	3.16043	0.205414	0.837249	0.99994	L4/5 IT Glut	up
Olfr905	0.0895343	0.649196	3.16043	0.205414	0.837249	0.99994	L4/5 IT Glut	up
Olfr1388	0.0895343	0.649196	3.16043	0.205414	0.837249	0.99994	L4/5 IT Glut	up
Olfr1361	0.0895343	0.649196	3.16043	0.205414	0.837249	0.99994	L4/5 IT Glut	up
Vmn2r91	0.0895343	0.649196	3.16043	0.205414	0.837249	0.99994	L4/5 IT Glut	up
Olfr91	0.0895343	0.649196	3.16043	0.205414	0.837249	0.99994	L4/5 IT Glut	up
1600014C23Rik	0.0895343	0.649196	3.16043	0.205414	0.837249	0.99994	L4/5 IT Glut	up
Hrh4	0.0895343	0.649196	3.16043	0.205414	0.837249	0.99994	L4/5 IT Glut	up
Rtl3	0.0895343	0.649196	3.16043	0.205414	0.837249	0.99994	L4/5 IT Glut	up
Nptx2	75.2376	0.648081	0.208965	3.10139	0.00192614	0.99994	L4/5 IT Glut	up
Amz1	1.84175	0.647586	1.27608	0.507481	0.611817	0.99994	L4/5 IT Glut	up
Clec2d	0.272909	0.645169	3.1459	0.205082	0.837508	0.99994	L4/5 IT Glut	up
Itgad	0.272909	0.645169	3.1459	0.205082	0.837508	0.99994	L4/5 IT Glut	up
Gm19935	0.272909	0.645169	3.1459	0.205082	0.837508	0.99994	L4/5 IT Glut	up
Il20ra	0.272909	0.645169	3.1459	0.205082	0.837508	0.99994	L4/5 IT Glut	up
Gm11627	0.582293	0.644296	2.2904	0.281303	0.778478	0.99994	L4/5 IT Glut	up
Gm4969	0.595494	0.644238	2.27377	0.283335	0.77692	0.99994	L4/5 IT Glut	up
Tex14	14.9615	0.644176	0.427237	1.50777	0.131613	0.99994	L4/5 IT Glut	up
Tm6sf2	7.72932	0.64344	0.604602	1.06424	0.287221	0.99994	L4/5 IT Glut	up
Nxpe5	0.240342	0.642898	3.13219	0.205255	0.837373	0.99994	L4/5 IT Glut	up
Ntf5	0.240342	0.642898	3.13219	0.205255	0.837373	0.99994	L4/5 IT Glut	up
Il22	0.240342	0.642898	3.13219	0.205255	0.837373	0.99994	L4/5 IT Glut	up
Pih1h3b	0.240342	0.642898	3.13219	0.205255	0.837373	0.99994	L4/5 IT Glut	up
B020011L13Rik	0.240342	0.642898	3.13219	0.205255	0.837373	0.99994	L4/5 IT Glut	up
Olfr472	0.240342	0.642898	3.13219	0.205255	0.837373	0.99994	L4/5 IT Glut	up
Defb37	0.240342	0.642898	3.13219	0.205255	0.837373	0.99994	L4/5 IT Glut	up
Relb	34.6651	0.642787	0.353407	1.81883	0.0689374	0.99994	L4/5 IT Glut	up
Mlkl	0.665331	0.642657	2.10723	0.304977	0.760383	0.99994	L4/5 IT Glut	up
Gm14308	1.93374	0.642239	1.26504	0.507685	0.611675	0.99994	L4/5 IT Glut	up
Sncg	0.32416	0.642107	3.13221	0.205002	0.837571	0.99994	L4/5 IT Glut	up
R3hcc1	11.3961	0.640398	0.505248	1.26749	0.204979	0.99994	L4/5 IT Glut	up
Arsj	16.6076	0.640268	0.448367	1.428	0.153292	0.99994	L4/5 IT Glut	up
Tecrl	0.796817	0.639251	1.8162	0.351971	0.72486	0.99994	L4/5 IT Glut	up
Cldn3	0.275801	0.638033	3.13248	0.203683	0.838601	0.99994	L4/5 IT Glut	up
Usp44	0.275801	0.638033	3.13248	0.203683	0.838601	0.99994	L4/5 IT Glut	up
Gtse1	0.275801	0.638033	3.13248	0.203683	0.838601	0.99994	L4/5 IT Glut	up
Il2rg	0.275801	0.638033	3.13248	0.203683	0.838601	0.99994	L4/5 IT Glut	up
Prdm12	0.39115	0.637702	2.91838	0.218512	0.82703	0.99994	L4/5 IT Glut	up
Hist3h2ba	8.73926	0.636662	0.590283	1.07857	0.280779	0.99994	L4/5 IT Glut	up
Gnmt	7.96086	0.63653	0.586057	1.08612	0.277425	0.99994	L4/5 IT Glut	up
Ifitm1	1.24697	0.636483	1.58077	0.40264	0.687213	0.99994	L4/5 IT Glut	up
Slc23a3	18.2378	0.635468	0.420007	1.51299	0.130281	0.99994	L4/5 IT Glut	up
Metrn	2.62049	0.635383	1.10894	0.572965	0.566668	0.99994	L4/5 IT Glut	up
Acoxl	0.610067	0.635206	2.19557	0.289313	0.772342	0.99994	L4/5 IT Glut	up
Urb2	25.2091	0.63515	0.332963	1.90757	0.0564469	0.99994	L4/5 IT Glut	up
Chrna6	0.33932	0.634516	3.1289	0.202792	0.839297	0.99994	L4/5 IT Glut	up
Ppic	0.33932	0.634516	3.1289	0.202792	0.839297	0.99994	L4/5 IT Glut	up
Rhpn2	1.07805	0.632854	1.67304	0.378266	0.705233	0.99994	L4/5 IT Glut	up
1700017B05Rik	10.7807	0.632849	0.512606	1.23457	0.21699	0.99994	L4/5 IT Glut	up
Nr1h4	0.275681	0.632836	3.14659	0.201118	0.840606	0.99994	L4/5 IT Glut	up
Zfp473	2.40013	0.632464	1.00867	0.627028	0.530641	0.99994	L4/5 IT Glut	up
Pigr	0.0820622	0.63103	3.15837	0.199796	0.84164	0.99994	L4/5 IT Glut	up
Fcgr2b	0.0820622	0.63103	3.15837	0.199796	0.84164	0.99994	L4/5 IT Glut	up
Vsx1	0.0820622	0.63103	3.15837	0.199796	0.84164	0.99994	L4/5 IT Glut	up
4930470P17Rik	0.0820622	0.63103	3.15837	0.199796	0.84164	0.99994	L4/5 IT Glut	up
Il2	0.0820622	0.63103	3.15837	0.199796	0.84164	0.99994	L4/5 IT Glut	up
Hist2h2aa1	0.0820622	0.63103	3.15837	0.199796	0.84164	0.99994	L4/5 IT Glut	up
Chil3	0.0820622	0.63103	3.15837	0.199796	0.84164	0.99994	L4/5 IT Glut	up
B020004J07Rik	0.0820622	0.63103	3.15837	0.199796	0.84164	0.99994	L4/5 IT Glut	up
Matn1	0.0820622	0.63103	3.15837	0.199796	0.84164	0.99994	L4/5 IT Glut	up
Trim63	0.0820622	0.63103	3.15837	0.199796	0.84164	0.99994	L4/5 IT Glut	up
Zfp987	0.0820622	0.63103	3.15837	0.199796	0.84164	0.99994	L4/5 IT Glut	up
Dspp	0.0820622	0.63103	3.15837	0.199796	0.84164	0.99994	L4/5 IT Glut	up
Myl2	0.0820622	0.63103	3.15837	0.199796	0.84164	0.99994	L4/5 IT Glut	up
Dnaaf3	0.0820622	0.63103	3.15837	0.199796	0.84164	0.99994	L4/5 IT Glut	up
Mkrn3	0.0820622	0.63103	3.15837	0.199796	0.84164	0.99994	L4/5 IT Glut	up
Gucy2d	0.0820622	0.63103	3.15837	0.199796	0.84164	0.99994	L4/5 IT Glut	up
Olfr685	0.0820622	0.63103	3.15837	0.199796	0.84164	0.99994	L4/5 IT Glut	up
Helt	0.0820622	0.63103	3.15837	0.199796	0.84164	0.99994	L4/5 IT Glut	up
Onecut1	0.0820622	0.63103	3.15837	0.199796	0.84164	0.99994	L4/5 IT Glut	up
Scgn	0.0820622	0.63103	3.15837	0.199796	0.84164	0.99994	L4/5 IT Glut	up
Susd3	0.0820622	0.63103	3.15837	0.199796	0.84164	0.99994	L4/5 IT Glut	up
Slc6a19	0.0820622	0.63103	3.15837	0.199796	0.84164	0.99994	L4/5 IT Glut	up
Aqp6	0.0820622	0.63103	3.15837	0.199796	0.84164	0.99994	L4/5 IT Glut	up
Erich4	0.0820622	0.63103	3.15837	0.199796	0.84164	0.99994	L4/5 IT Glut	up
Lif	0.0820622	0.63103	3.15837	0.199796	0.84164	0.99994	L4/5 IT Glut	up
Glipr1l1	0.0820622	0.63103	3.15837	0.199796	0.84164	0.99994	L4/5 IT Glut	up
Avpr1a	0.0820622	0.63103	3.15837	0.199796	0.84164	0.99994	L4/5 IT Glut	up
Trim38	0.0820622	0.63103	3.15837	0.199796	0.84164	0.99994	L4/5 IT Glut	up
Tbpl2	0.0820622	0.63103	3.15837	0.199796	0.84164	0.99994	L4/5 IT Glut	up
Asb17	0.0820622	0.63103	3.15837	0.199796	0.84164	0.99994	L4/5 IT Glut	up
Spaca1	0.0820622	0.63103	3.15837	0.199796	0.84164	0.99994	L4/5 IT Glut	up
Edn2	0.0820622	0.63103	3.15837	0.199796	0.84164	0.99994	L4/5 IT Glut	up
Galntl5	0.0820622	0.63103	3.15837	0.199796	0.84164	0.99994	L4/5 IT Glut	up
Try5	0.0820622	0.63103	3.15837	0.199796	0.84164	0.99994	L4/5 IT Glut	up
Chrna10	0.0820622	0.63103	3.15837	0.199796	0.84164	0.99994	L4/5 IT Glut	up
Ccl3	0.0820622	0.63103	3.15837	0.199796	0.84164	0.99994	L4/5 IT Glut	up
Gip	0.0820622	0.63103	3.15837	0.199796	0.84164	0.99994	L4/5 IT Glut	up
Trim80	0.0820622	0.63103	3.15837	0.199796	0.84164	0.99994	L4/5 IT Glut	up
Nt5c1b	0.0820622	0.63103	3.15837	0.199796	0.84164	0.99994	L4/5 IT Glut	up
Arl11	0.0820622	0.63103	3.15837	0.199796	0.84164	0.99994	L4/5 IT Glut	up
Prss56	0.0820622	0.63103	3.15837	0.199796	0.84164	0.99994	L4/5 IT Glut	up
Olfr352	0.0820622	0.63103	3.15837	0.199796	0.84164	0.99994	L4/5 IT Glut	up
Scp2d1	0.0820622	0.63103	3.15837	0.199796	0.84164	0.99994	L4/5 IT Glut	up
Hemgn	0.0820622	0.63103	3.15837	0.199796	0.84164	0.99994	L4/5 IT Glut	up
Gm10300	0.0820622	0.63103	3.15837	0.199796	0.84164	0.99994	L4/5 IT Glut	up
Hyal4	0.0820622	0.63103	3.15837	0.199796	0.84164	0.99994	L4/5 IT Glut	up
Vmn1r5	0.0820622	0.63103	3.15837	0.199796	0.84164	0.99994	L4/5 IT Glut	up
Gp6	0.0820622	0.63103	3.15837	0.199796	0.84164	0.99994	L4/5 IT Glut	up
Sult2a7	0.0820622	0.63103	3.15837	0.199796	0.84164	0.99994	L4/5 IT Glut	up
Olfr657	0.0820622	0.63103	3.15837	0.199796	0.84164	0.99994	L4/5 IT Glut	up
F10	0.0820622	0.63103	3.15837	0.199796	0.84164	0.99994	L4/5 IT Glut	up
Ankk1	0.0820622	0.63103	3.15837	0.199796	0.84164	0.99994	L4/5 IT Glut	up
C2cd4a	0.0820622	0.63103	3.15837	0.199796	0.84164	0.99994	L4/5 IT Glut	up
Vnn3	0.0820622	0.63103	3.15837	0.199796	0.84164	0.99994	L4/5 IT Glut	up
Hist1h2ai	0.0820622	0.63103	3.15837	0.199796	0.84164	0.99994	L4/5 IT Glut	up
Gm8108	0.0820622	0.63103	3.15837	0.199796	0.84164	0.99994	L4/5 IT Glut	up
Olfr164	0.0820622	0.63103	3.15837	0.199796	0.84164	0.99994	L4/5 IT Glut	up
Cdca5	0.0820622	0.63103	3.15837	0.199796	0.84164	0.99994	L4/5 IT Glut	up
Eras	0.0820622	0.63103	3.15837	0.199796	0.84164	0.99994	L4/5 IT Glut	up
Awat1	0.0820622	0.63103	3.15837	0.199796	0.84164	0.99994	L4/5 IT Glut	up
Edar	0.909352	0.630651	1.76181	0.357955	0.720377	0.99994	L4/5 IT Glut	up
Vmn1r88	0.230643	0.630514	3.13009	0.201436	0.840358	0.99994	L4/5 IT Glut	up
Olfr678	0.230643	0.630514	3.13009	0.201436	0.840358	0.99994	L4/5 IT Glut	up
2310039H08Rik	0.507051	0.629117	2.64339	0.237996	0.811884	0.99994	L4/5 IT Glut	up
Rnd3	110.138	0.628242	0.177148	3.54642	3.9050332304015e-4	0.557778	L4/5 IT Glut	up
Serpinb5	0.125357	0.628174	3.15804	0.198913	0.842331	0.99994	L4/5 IT Glut	up
F5	0.125357	0.628174	3.15804	0.198913	0.842331	0.99994	L4/5 IT Glut	up
Irf6	0.125357	0.628174	3.15804	0.198913	0.842331	0.99994	L4/5 IT Glut	up
Olfr365	0.125357	0.628174	3.15804	0.198913	0.842331	0.99994	L4/5 IT Glut	up
Pla2r1	0.125357	0.628174	3.15804	0.198913	0.842331	0.99994	L4/5 IT Glut	up
Mall	0.125357	0.628174	3.15804	0.198913	0.842331	0.99994	L4/5 IT Glut	up
Bub1	0.125357	0.628174	3.15804	0.198913	0.842331	0.99994	L4/5 IT Glut	up
Slc52a3	0.125357	0.628174	3.15804	0.198913	0.842331	0.99994	L4/5 IT Glut	up
Actl10	0.125357	0.628174	3.15804	0.198913	0.842331	0.99994	L4/5 IT Glut	up
Snai1	0.125357	0.628174	3.15804	0.198913	0.842331	0.99994	L4/5 IT Glut	up
Spo11	0.125357	0.628174	3.15804	0.198913	0.842331	0.99994	L4/5 IT Glut	up
Hapln2	0.125357	0.628174	3.15804	0.198913	0.842331	0.99994	L4/5 IT Glut	up
Pglyrp3	0.125357	0.628174	3.15804	0.198913	0.842331	0.99994	L4/5 IT Glut	up
Zfp600	0.125357	0.628174	3.15804	0.198913	0.842331	0.99994	L4/5 IT Glut	up
Gm21671	0.125357	0.628174	3.15804	0.198913	0.842331	0.99994	L4/5 IT Glut	up
Cnpy1	0.125357	0.628174	3.15804	0.198913	0.842331	0.99994	L4/5 IT Glut	up
Cytl1	0.125357	0.628174	3.15804	0.198913	0.842331	0.99994	L4/5 IT Glut	up
Gimap9	0.125357	0.628174	3.15804	0.198913	0.842331	0.99994	L4/5 IT Glut	up
Erp27	0.125357	0.628174	3.15804	0.198913	0.842331	0.99994	L4/5 IT Glut	up
Nlrp10	0.125357	0.628174	3.15804	0.198913	0.842331	0.99994	L4/5 IT Glut	up
Hsd17b2	0.125357	0.628174	3.15804	0.198913	0.842331	0.99994	L4/5 IT Glut	up
Rbpms2	0.125357	0.628174	3.15804	0.198913	0.842331	0.99994	L4/5 IT Glut	up
Zic1	0.125357	0.628174	3.15804	0.198913	0.842331	0.99994	L4/5 IT Glut	up
Fbxw15	0.125357	0.628174	3.15804	0.198913	0.842331	0.99994	L4/5 IT Glut	up
Lilrb4a	0.125357	0.628174	3.15804	0.198913	0.842331	0.99994	L4/5 IT Glut	up
Ccr10	0.125357	0.628174	3.15804	0.198913	0.842331	0.99994	L4/5 IT Glut	up
Hist1h4n	0.125357	0.628174	3.15804	0.198913	0.842331	0.99994	L4/5 IT Glut	up
Gpx8	0.125357	0.628174	3.15804	0.198913	0.842331	0.99994	L4/5 IT Glut	up
Anxa8	0.125357	0.628174	3.15804	0.198913	0.842331	0.99994	L4/5 IT Glut	up
Pnp2	0.125357	0.628174	3.15804	0.198913	0.842331	0.99994	L4/5 IT Glut	up
Ltb4r1	0.125357	0.628174	3.15804	0.198913	0.842331	0.99994	L4/5 IT Glut	up
Ncf4	0.125357	0.628174	3.15804	0.198913	0.842331	0.99994	L4/5 IT Glut	up
Bik	0.125357	0.628174	3.15804	0.198913	0.842331	0.99994	L4/5 IT Glut	up
B3gnt5	0.125357	0.628174	3.15804	0.198913	0.842331	0.99994	L4/5 IT Glut	up
Lrrc26	0.125357	0.628174	3.15804	0.198913	0.842331	0.99994	L4/5 IT Glut	up
Olfr967	0.125357	0.628174	3.15804	0.198913	0.842331	0.99994	L4/5 IT Glut	up
Rtp3	0.125357	0.628174	3.15804	0.198913	0.842331	0.99994	L4/5 IT Glut	up
Lrr1	0.125357	0.628174	3.15804	0.198913	0.842331	0.99994	L4/5 IT Glut	up
Zfp474	0.125357	0.628174	3.15804	0.198913	0.842331	0.99994	L4/5 IT Glut	up
Slc26a9	0.125357	0.628174	3.15804	0.198913	0.842331	0.99994	L4/5 IT Glut	up
Lhx3	0.125357	0.628174	3.15804	0.198913	0.842331	0.99994	L4/5 IT Glut	up
Gm17555	0.125357	0.628174	3.15804	0.198913	0.842331	0.99994	L4/5 IT Glut	up
Clec4n	0.125357	0.628174	3.15804	0.198913	0.842331	0.99994	L4/5 IT Glut	up
Kctd19	0.125357	0.628174	3.15804	0.198913	0.842331	0.99994	L4/5 IT Glut	up
Vmn2r89	0.125357	0.628174	3.15804	0.198913	0.842331	0.99994	L4/5 IT Glut	up
Phf11a	0.125357	0.628174	3.15804	0.198913	0.842331	0.99994	L4/5 IT Glut	up
Eppk1	0.125357	0.628174	3.15804	0.198913	0.842331	0.99994	L4/5 IT Glut	up
Tmem71	0.273938	0.627705	3.12977	0.20056	0.841043	0.99994	L4/5 IT Glut	up
Ticam2	0.273938	0.627705	3.12977	0.20056	0.841043	0.99994	L4/5 IT Glut	up
Hist2h2ac	0.273938	0.627705	3.12977	0.20056	0.841043	0.99994	L4/5 IT Glut	up
Tpbg	1.62698	0.626124	1.37536	0.455244	0.648934	0.99994	L4/5 IT Glut	up
Ctsh	0.878282	0.624944	1.83672	0.340251	0.733668	0.99994	L4/5 IT Glut	up
Col1a2	1.57069	0.624902	1.50609	0.414917	0.678203	0.99994	L4/5 IT Glut	up
AW551984	0.316688	0.624153	3.13019	0.199398	0.841952	0.99994	L4/5 IT Glut	up
Hcrtr1	0.509987	0.623113	2.63687	0.236308	0.813194	0.99994	L4/5 IT Glut	up
Enthd1	2.33606	0.623073	1.17724	0.529267	0.59662	0.99994	L4/5 IT Glut	up
Cldn15	1.00288	0.622756	1.82909	0.340473	0.7335	0.99994	L4/5 IT Glut	up
Sod3	0.276165	0.622142	3.12984	0.198777	0.842437	0.99994	L4/5 IT Glut	up
Exo5	11.7759	0.622059	0.503317	1.23592	0.216489	0.99994	L4/5 IT Glut	up
Frmpd2	2.11806	0.621577	1.1399	0.54529	0.585554	0.99994	L4/5 IT Glut	up
Ccdc170	0.806445	0.621026	1.85345	0.335065	0.737576	0.99994	L4/5 IT Glut	up
Lrrn4	0.268329	0.61981	3.13046	0.197993	0.84305	0.99994	L4/5 IT Glut	up
Gm10334	0.268329	0.61981	3.13046	0.197993	0.84305	0.99994	L4/5 IT Glut	up
Hpx	0.268329	0.61981	3.13046	0.197993	0.84305	0.99994	L4/5 IT Glut	up
Mtrr	18.1145	0.618985	0.38541	1.60604	0.108264	0.99994	L4/5 IT Glut	up
Aoc3	0.606811	0.617554	2.19441	0.281421	0.778387	0.99994	L4/5 IT Glut	up
Fgl2	0.565854	0.617316	2.17927	0.283267	0.776972	0.99994	L4/5 IT Glut	up
Qrich2	0.408492	0.617077	2.89201	0.213373	0.831036	0.99994	L4/5 IT Glut	up
Terb2	0.408492	0.617077	2.89201	0.213373	0.831036	0.99994	L4/5 IT Glut	up
Rfx8	0.311624	0.616945	3.13013	0.197099	0.84375	0.99994	L4/5 IT Glut	up
BC035044	0.311624	0.616945	3.13013	0.197099	0.84375	0.99994	L4/5 IT Glut	up
Klk8	0.311624	0.616945	3.13013	0.197099	0.84375	0.99994	L4/5 IT Glut	up
Vav1	0.311624	0.616945	3.13013	0.197099	0.84375	0.99994	L4/5 IT Glut	up
Ecscr	0.311624	0.616945	3.13013	0.197099	0.84375	0.99994	L4/5 IT Glut	up
Rbp4	3.9734	0.615813	0.898128	0.685663	0.492926	0.99994	L4/5 IT Glut	up
Fcgr1	0.336064	0.615726	3.13729	0.19626	0.844406	0.99994	L4/5 IT Glut	up
Morn3	0.336064	0.615726	3.13729	0.19626	0.844406	0.99994	L4/5 IT Glut	up
Zfp988	1.62816	0.61569	1.41726	0.434422	0.663982	0.99994	L4/5 IT Glut	up
Mrgpre	0.551314	0.61492	2.54686	0.241443	0.809212	0.99994	L4/5 IT Glut	up
Cstad	5.4124	0.614631	0.718778	0.855106	0.392493	0.99994	L4/5 IT Glut	up
Foxr2	2.15524	0.61446	1.12501	0.546183	0.58494	0.99994	L4/5 IT Glut	up
Jhy	0.959894	0.614183	1.86757	0.328867	0.742256	0.99994	L4/5 IT Glut	up
Egfl8	7.12723	0.614117	0.648351	0.947197	0.343538	0.99994	L4/5 IT Glut	up
Bend7	25.3874	0.613209	0.347444	1.76491	0.0775783	0.99994	L4/5 IT Glut	up
Ccr2	0.451787	0.612752	2.78081	0.22035	0.825598	0.99994	L4/5 IT Glut	up
Fam129b	172.855	0.611652	0.202163	3.02554	0.00248187	0.99994	L4/5 IT Glut	up
Gm8206	0.266466	0.610596	3.15575	0.193487	0.846578	0.99994	L4/5 IT Glut	up
Atp12a	0.266466	0.610596	3.15575	0.193487	0.846578	0.99994	L4/5 IT Glut	up
Lsm2	16.0239	0.609272	0.426886	1.42725	0.153509	0.99994	L4/5 IT Glut	up
Msln	0.885132	0.607498	1.86589	0.325581	0.744742	0.99994	L4/5 IT Glut	up
Rpa2	9.74241	0.607193	0.536926	1.13087	0.25811	0.99994	L4/5 IT Glut	up
Parp14	1.08399	0.607096	1.71705	0.353569	0.723662	0.99994	L4/5 IT Glut	up
Gm17662	0.295541	0.606565	3.14418	0.192917	0.847024	0.99994	L4/5 IT Glut	up
Oaf	0.78594	0.606142	2.21396	0.273782	0.784252	0.99994	L4/5 IT Glut	up
Ampd1	0.65617	0.605903	2.10967	0.287203	0.773957	0.99994	L4/5 IT Glut	up
Nos1	4.75295	0.605692	0.751398	0.806087	0.420193	0.99994	L4/5 IT Glut	up
Nt5c1a	0.145217	0.604574	3.15508	0.191619	0.848041	0.99994	L4/5 IT Glut	up
Ptafr	0.145217	0.604574	3.15508	0.191619	0.848041	0.99994	L4/5 IT Glut	up
Zfp980	0.145217	0.604574	3.15508	0.191619	0.848041	0.99994	L4/5 IT Glut	up
Il23r	0.145217	0.604574	3.15508	0.191619	0.848041	0.99994	L4/5 IT Glut	up
Acsm5	0.145217	0.604574	3.15508	0.191619	0.848041	0.99994	L4/5 IT Glut	up
Nod2	0.145217	0.604574	3.15508	0.191619	0.848041	0.99994	L4/5 IT Glut	up
Caps2	0.145217	0.604574	3.15508	0.191619	0.848041	0.99994	L4/5 IT Glut	up
Tnfsf11	0.145217	0.604574	3.15508	0.191619	0.848041	0.99994	L4/5 IT Glut	up
Dsg3	0.145217	0.604574	3.15508	0.191619	0.848041	0.99994	L4/5 IT Glut	up
Prdm6	0.145217	0.604574	3.15508	0.191619	0.848041	0.99994	L4/5 IT Glut	up
Gstp2	0.145217	0.604574	3.15508	0.191619	0.848041	0.99994	L4/5 IT Glut	up
Sytl4	0.145217	0.604574	3.15508	0.191619	0.848041	0.99994	L4/5 IT Glut	up
Kcnn4	0.145217	0.604574	3.15508	0.191619	0.848041	0.99994	L4/5 IT Glut	up
Gpr143	0.293797	0.604505	3.12689	0.193325	0.846705	0.99994	L4/5 IT Glut	up
Magix	0.557072	0.60444039296168794	2.22539	0.271611	0.785921	0.99994	L4/5 IT Glut	up
Uts2	1.61784	0.604425	1.28723	0.469556	0.638672	0.99994	L4/5 IT Glut	up
B3galt6	8.85883	0.60435	0.5825	1.03751	0.299498	0.99994	L4/5 IT Glut	up
Hpdl	0.845461	0.604229	1.85676	0.325421	0.744863	0.99994	L4/5 IT Glut	up
Acot4	4.7233	0.603666	0.747128	0.807981	0.419101	0.99994	L4/5 IT Glut	up
Hoga1	7.81654	0.603534	0.609692	0.9899	0.322223	0.99994	L4/5 IT Glut	up
S1pr2	0.454595	0.603506	2.74751	0.219656	0.826139	0.99994	L4/5 IT Glut	up
Cobll1	4.00043	0.603033	0.834881	0.722298	0.470111	0.99994	L4/5 IT Glut	up
Cps1	0.0815783	0.602919	3.15486	0.191108	0.848441	0.99994	L4/5 IT Glut	up
Crocc2	0.0815783	0.602919	3.15486	0.191108	0.848441	0.99994	L4/5 IT Glut	up
Pdcd1	0.0815783	0.602919	3.15486	0.191108	0.848441	0.99994	L4/5 IT Glut	up
Ifi204	0.0815783	0.602919	3.15486	0.191108	0.848441	0.99994	L4/5 IT Glut	up
Adamts13	0.0815783	0.602919	3.15486	0.191108	0.848441	0.99994	L4/5 IT Glut	up
Phgr1	0.0815783	0.602919	3.15486	0.191108	0.848441	0.99994	L4/5 IT Glut	up
Hdc	0.0815783	0.602919	3.15486	0.191108	0.848441	0.99994	L4/5 IT Glut	up
Prom2	0.0815783	0.602919	3.15486	0.191108	0.848441	0.99994	L4/5 IT Glut	up
Rspo4	0.0815783	0.602919	3.15486	0.191108	0.848441	0.99994	L4/5 IT Glut	up
Cyp24a1	0.0815783	0.602919	3.15486	0.191108	0.848441	0.99994	L4/5 IT Glut	up
Tigd4	0.0815783	0.602919	3.15486	0.191108	0.848441	0.99994	L4/5 IT Glut	up
Rab25	0.0815783	0.602919	3.15486	0.191108	0.848441	0.99994	L4/5 IT Glut	up
Tshb	0.0815783	0.602919	3.15486	0.191108	0.848441	0.99994	L4/5 IT Glut	up
Ifi44	0.0815783	0.602919	3.15486	0.191108	0.848441	0.99994	L4/5 IT Glut	up
Gm136	0.0815783	0.602919	3.15486	0.191108	0.848441	0.99994	L4/5 IT Glut	up
Rnf183	0.0815783	0.602919	3.15486	0.191108	0.848441	0.99994	L4/5 IT Glut	up
Fam229a	0.0815783	0.602919	3.15486	0.191108	0.848441	0.99994	L4/5 IT Glut	up
Fam167b	0.0815783	0.602919	3.15486	0.191108	0.848441	0.99994	L4/5 IT Glut	up
Hspb7	0.0815783	0.602919	3.15486	0.191108	0.848441	0.99994	L4/5 IT Glut	up
Oasl1	0.0815783	0.602919	3.15486	0.191108	0.848441	0.99994	L4/5 IT Glut	up
Pilra	0.0815783	0.602919	3.15486	0.191108	0.848441	0.99994	L4/5 IT Glut	up
Gm9008	0.0815783	0.602919	3.15486	0.191108	0.848441	0.99994	L4/5 IT Glut	up
Vmn2r65	0.0815783	0.602919	3.15486	0.191108	0.848441	0.99994	L4/5 IT Glut	up
Art1	0.0815783	0.602919	3.15486	0.191108	0.848441	0.99994	L4/5 IT Glut	up
Olfr683	0.0815783	0.602919	3.15486	0.191108	0.848441	0.99994	L4/5 IT Glut	up
Cyb5r2	0.0815783	0.602919	3.15486	0.191108	0.848441	0.99994	L4/5 IT Glut	up
Slc22a18	0.0815783	0.602919	3.15486	0.191108	0.848441	0.99994	L4/5 IT Glut	up
Tex24	0.0815783	0.602919	3.15486	0.191108	0.848441	0.99994	L4/5 IT Glut	up
Ces1f	0.0815783	0.602919	3.15486	0.191108	0.848441	0.99994	L4/5 IT Glut	up
Ces2b	0.0815783	0.602919	3.15486	0.191108	0.848441	0.99994	L4/5 IT Glut	up
Kbtbd13	0.0815783	0.602919	3.15486	0.191108	0.848441	0.99994	L4/5 IT Glut	up
Eomes	0.0815783	0.602919	3.15486	0.191108	0.848441	0.99994	L4/5 IT Glut	up
S1pr4	0.0815783	0.602919	3.15486	0.191108	0.848441	0.99994	L4/5 IT Glut	up
Scgb3a1	0.0815783	0.602919	3.15486	0.191108	0.848441	0.99994	L4/5 IT Glut	up
Slfn9	0.0815783	0.602919	3.15486	0.191108	0.848441	0.99994	L4/5 IT Glut	up
Efcab3	0.0815783	0.602919	3.15486	0.191108	0.848441	0.99994	L4/5 IT Glut	up
Ush1g	0.0815783	0.602919	3.15486	0.191108	0.848441	0.99994	L4/5 IT Glut	up
Dio3	0.0815783	0.602919	3.15486	0.191108	0.848441	0.99994	L4/5 IT Glut	up
Gpr132	0.0815783	0.602919	3.15486	0.191108	0.848441	0.99994	L4/5 IT Glut	up
BC048507	0.0815783	0.602919	3.15486	0.191108	0.848441	0.99994	L4/5 IT Glut	up
3425401B19Rik	0.0815783	0.602919	3.15486	0.191108	0.848441	0.99994	L4/5 IT Glut	up
Cdhr1	0.0815783	0.602919	3.15486	0.191108	0.848441	0.99994	L4/5 IT Glut	up
Otx2	0.0815783	0.602919	3.15486	0.191108	0.848441	0.99994	L4/5 IT Glut	up
Dcstamp	0.0815783	0.602919	3.15486	0.191108	0.848441	0.99994	L4/5 IT Glut	up
Wbp2nl	0.0815783	0.602919	3.15486	0.191108	0.848441	0.99994	L4/5 IT Glut	up
Krt18	0.0815783	0.602919	3.15486	0.191108	0.848441	0.99994	L4/5 IT Glut	up
Sytl3	0.0815783	0.602919	3.15486	0.191108	0.848441	0.99994	L4/5 IT Glut	up
Cldn6	0.0815783	0.602919	3.15486	0.191108	0.848441	0.99994	L4/5 IT Glut	up
H2-Q1	0.0815783	0.602919	3.15486	0.191108	0.848441	0.99994	L4/5 IT Glut	up
B430306N03Rik	0.0815783	0.602919	3.15486	0.191108	0.848441	0.99994	L4/5 IT Glut	up
Myo7b	0.0815783	0.602919	3.15486	0.191108	0.848441	0.99994	L4/5 IT Glut	up
Pnliprp1	0.0815783	0.602919	3.15486	0.191108	0.848441	0.99994	L4/5 IT Glut	up
Slc6a14	0.0815783	0.602919	3.15486	0.191108	0.848441	0.99994	L4/5 IT Glut	up
Fndc3c1	0.0815783	0.602919	3.15486	0.191108	0.848441	0.99994	L4/5 IT Glut	up
Gucy2f	0.0815783	0.602919	3.15486	0.191108	0.848441	0.99994	L4/5 IT Glut	up
Gm21294	0.0815783	0.602919	3.15486	0.191108	0.848441	0.99994	L4/5 IT Glut	up
Ppp1r3a	0.230159	0.602877	3.12667	0.192818	0.847102	0.99994	L4/5 IT Glut	up
Dok1	0.230159	0.602877	3.12667	0.192818	0.847102	0.99994	L4/5 IT Glut	up
Hist1h2ap	0.230159	0.602877	3.12667	0.192818	0.847102	0.99994	L4/5 IT Glut	up
Cks2	4.88527	0.602839	0.71885	0.838616	0.401685	0.99994	L4/5 IT Glut	up
Patl2	2.58679	0.60263	1.03737	0.580922	0.561293	0.99994	L4/5 IT Glut	up
Casq1	12.2306	0.601941	0.471471	1.27673	0.201698	0.99994	L4/5 IT Glut	up
Tfcp2l1	1.80574	0.601026	1.1616	0.517414	0.604867	0.99994	L4/5 IT Glut	up
Plin4	2.16381	0.600283	1.14982	0.522069	0.601623	0.99994	L4/5 IT Glut	up
Pcna	25.6144	0.599944	0.346327	1.7323	0.0832198	0.99994	L4/5 IT Glut	up
Timm17b	14.3273	0.599698	0.446487	1.34315	0.179225	0.99994	L4/5 IT Glut	up
Megf11	48.4649	0.599652	0.306167	1.95858	0.0501619	0.99994	L4/5 IT Glut	up
Clec3b	4.50342	0.599547	0.778454	0.770176	0.441195	0.99994	L4/5 IT Glut	up
Atp2a1	1.1616	0.599037	1.57653	0.379972	0.703966	0.99994	L4/5 IT Glut	up
Susd2	1.64189	0.599027	1.34235	0.446252	0.655415	0.99994	L4/5 IT Glut	up
Coa4	1.34073	0.599024	1.45304	0.412255	0.680153	0.99994	L4/5 IT Glut	up
Dnaaf2	7.32515	0.598928	0.617848	0.969378	0.332357	0.99994	L4/5 IT Glut	up
E2f2	0.296025	0.598843	3.12696	0.19151	0.848126	0.99994	L4/5 IT Glut	up
Spi1	0.49789	0.598098	2.65076	0.225633	0.821487	0.99994	L4/5 IT Glut	up
Vmn2r108	0.49789	0.598098	2.65076	0.225633	0.821487	0.99994	L4/5 IT Glut	up
Tg	0.379843	0.597693	2.97012	0.201236	0.840514	0.99994	L4/5 IT Glut	up
Fhl3	0.232386	0.597207	3.12674	0.191	0.848526	0.99994	L4/5 IT Glut	up
Apoc1	0.232386	0.597207	3.12674	0.191	0.848526	0.99994	L4/5 IT Glut	up
Ccr7	0.232386	0.597207	3.12674	0.191	0.848526	0.99994	L4/5 IT Glut	up
Ppp1r3g	0.232386	0.597207	3.12674	0.191	0.848526	0.99994	L4/5 IT Glut	up
Hsd17b3	0.232386	0.597207	3.12674	0.191	0.848526	0.99994	L4/5 IT Glut	up
H2-Aa	0.232386	0.597207	3.12674	0.191	0.848526	0.99994	L4/5 IT Glut	up
Ms4a7	0.232386	0.597207	3.12674	0.191	0.848526	0.99994	L4/5 IT Glut	up
Plvap	14.692	0.597158	0.426031	1.40168	0.161011	0.99994	L4/5 IT Glut	up
Spem1	0.380967	0.596431	2.52936	0.235804	0.813585	0.99994	L4/5 IT Glut	up
Galnt6	0.316204	0.596368	3.12676	0.19073	0.848737	0.99994	L4/5 IT Glut	up
Mc2r	0.316204	0.596368	3.12676	0.19073	0.848737	0.99994	L4/5 IT Glut	up
Tspan1	1.21922	0.595998	1.50055	0.397186	0.69123	0.99994	L4/5 IT Glut	up
Tas1r3	1.43923	0.595986	1.37345	0.433932	0.664338	0.99994	L4/5 IT Glut	up
Ccna2	3.45415	0.594672	0.863114	0.688984	0.490834	0.99994	L4/5 IT Glut	up
Gdf10	0.383194	0.593242	2.93414	0.202186	0.839771	0.99994	L4/5 IT Glut	up
Cav1	18.3302	0.592738	0.416952	1.4216	0.155143	0.99994	L4/5 IT Glut	up
Efnb3	3.47216	0.590613	1.04061	0.567562	0.570332	0.99994	L4/5 IT Glut	up
Trim21	0.452732	0.589884	2.41932	0.243823	0.807368	0.99994	L4/5 IT Glut	up
Kir3dl2	0.452732	0.589884	2.41932	0.243823	0.807368	0.99994	L4/5 IT Glut	up
Styxl1	2.35958	0.589838	1.10418	0.534186	0.593213	0.99994	L4/5 IT Glut	up
Nos3	3.24304	0.589474	0.964187	0.611369	0.540956	0.99994	L4/5 IT Glut	up
Gnat1	0.408008	0.589382	2.88884	0.20402	0.838338	0.99994	L4/5 IT Glut	up
Mmp28	0.408008	0.589382	2.88884	0.20402	0.838338	0.99994	L4/5 IT Glut	up
Nubp2	4.5229	0.588973	0.836066	0.704458	0.481147	0.99994	L4/5 IT Glut	up
P2ry13	1.73114	0.587634	1.22375	0.480192	0.631091	0.99994	L4/5 IT Glut	up
Dnajb3	0.286325	0.587504	3.15301	0.186331	0.852185	0.99994	L4/5 IT Glut	up
Ticrr	0.286325	0.587504	3.15301	0.186331	0.852185	0.99994	L4/5 IT Glut	up
Cyth4	0.701273	0.587429	2.03392	0.288817	0.772722	0.99994	L4/5 IT Glut	up
Fmo4	0.222687	0.585907	3.15278	0.185838	0.852572	0.99994	L4/5 IT Glut	up
Postn	0.222687	0.585907	3.15278	0.185838	0.852572	0.99994	L4/5 IT Glut	up
Ly6a	1.40445	0.585561	1.44803	0.404383	0.685931	0.99994	L4/5 IT Glut	up
Plet1	0.32962	0.584772	3.15267	0.185485	0.852849	0.99994	L4/5 IT Glut	up
Ggt5	0.467012	0.584433	2.3553	0.248136	0.804029	0.99994	L4/5 IT Glut	up
Kcnmb2	18.3726	0.58416	0.521062	1.12109	0.262248	0.99994	L4/5 IT Glut	up
Gm10800	0.265982	0.583262	3.15244	0.185019	0.853214	0.99994	L4/5 IT Glut	up
Dcaf12l2	0.265982	0.583262	3.15244	0.185019	0.853214	0.99994	L4/5 IT Glut	up
1110008P14Rik	84.1195	0.583115	0.198612	2.93595	0.00332527	0.99994	L4/5 IT Glut	up
Ap1m2	7.88008	0.582994	0.589831	0.988408	0.322953	0.99994	L4/5 IT Glut	up
Gjd2	0.979455	0.580673	1.75979	0.329967	0.741425	0.99994	L4/5 IT Glut	up
Edn3	0.736055	0.580053	2.45623	0.236156	0.813311	0.99994	L4/5 IT Glut	up
Capsl	0.457313	0.579807	2.40476	0.241108	0.809471	0.99994	L4/5 IT Glut	up
Zfp993	1.34639	0.579363	1.34	0.43236	0.66548	0.99994	L4/5 IT Glut	up
Hspb1	1.59393	0.579361	1.57382	0.368124	0.712781	0.99994	L4/5 IT Glut	up
Eme1	1.09406	0.579323	1.64602	0.351954	0.724873	0.99994	L4/5 IT Glut	up
Rbpjl	0.41679	0.578809	2.48112	0.233285	0.81554	0.99994	L4/5 IT Glut	up
Tmem176a	3.00782	0.578085	1.02862	0.562002	0.574115	0.99994	L4/5 IT Glut	up
Gm3488	0.611012	0.577859	1.91756	0.301351	0.763147	0.99994	L4/5 IT Glut	up
Shc4	18.6328	0.577029	0.444735	1.29747	0.19447	0.99994	L4/5 IT Glut	up
Kif28	1.66281	0.57617	1.31598	0.437827	0.661511	0.99994	L4/5 IT Glut	up
Rbpms	2.7908	0.575994	1.02151	0.563863	0.572847	0.99994	L4/5 IT Glut	up
Hps6	2.50287	0.57574	1.03996	0.553615	0.579842	0.99994	L4/5 IT Glut	up
Sowahc	1.91795	0.575449	1.33869	0.429859	0.667298	0.99994	L4/5 IT Glut	up
Nlrp12	0.971521	0.575311	1.67947	0.342555	0.731934	0.99994	L4/5 IT Glut	up
Zfp986	1.80072	0.574902	1.2681	0.453358	0.650291	0.99994	L4/5 IT Glut	up
Ptpru	16.3519	0.574875	0.434255	1.32382	0.185563	0.99994	L4/5 IT Glut	up
Vwf	0.51775	0.5743	2.6063	0.22035	0.825598	0.99994	L4/5 IT Glut	up
Naaa	16.037	0.573116	0.412283	1.3901	0.164497	0.99994	L4/5 IT Glut	up
Sqor	1.25151	0.572313	1.56722	0.365177	0.714979	0.99994	L4/5 IT Glut	up
Arhgdib	4.01654	0.571612	0.890524	0.641883	0.520949	0.99994	L4/5 IT Glut	up
Smim22	0.755577	0.570363	2.00809	0.284032	0.776386	0.99994	L4/5 IT Glut	up
Glis3	52.3901	0.56958	0.271934	2.09455	0.0362108	0.99994	L4/5 IT Glut	up
Sema4g	3.82133	0.569416	0.853046	0.667509	0.504447	0.99994	L4/5 IT Glut	up
Gm266	5.08815	0.569163	0.697729	0.815737	0.41465	0.99994	L4/5 IT Glut	up
BC067074	0.794015	0.568945	2.28236	0.249279	0.803145	0.99994	L4/5 IT Glut	up
Qrfpr	10.3382	0.567986	0.536707	1.05828	0.289928	0.99994	L4/5 IT Glut	up
Cmtm8	1.79397	0.567764	1.20152	0.472537	0.636544	0.99994	L4/5 IT Glut	up
C2cd6	3.71016	0.567725	0.859859	0.660254	0.509091	0.99994	L4/5 IT Glut	up
Irgc1	1.48332	0.567139	1.31512	0.431244	0.666291	0.99994	L4/5 IT Glut	up
Emp3	0.748906	0.566897	1.85019	0.306399	0.759301	0.99994	L4/5 IT Glut	up
Hcn4	5.01089	0.566504	0.752287	0.753042	0.451425	0.99994	L4/5 IT Glut	up
Erbb3	1.79375	0.566355	1.28517	0.440684	0.659442	0.99994	L4/5 IT Glut	up
Aurkc	1.12752	0.566087	1.66532	0.339926	0.733912	0.99994	L4/5 IT Glut	up
Gp1bb	8.91633	0.566057	0.558544	1.01345	0.310845	0.99994	L4/5 IT Glut	up
Cyb5d1	5.64381	0.565814	0.713561	0.792945	0.42781	0.99994	L4/5 IT Glut	up
Trhr2	1.63561	0.565777	1.28171	0.441423	0.658907	0.99994	L4/5 IT Glut	up
Il3ra	7.72095	0.565601	0.583523	0.969287	0.332402	0.99994	L4/5 IT Glut	up
Tmem156	0.515887	0.565412	2.3122	0.244534	0.806817	0.99994	L4/5 IT Glut	up
Ptcra	7.58689	0.565222	0.612167	0.923315	0.355843	0.99994	L4/5 IT Glut	up
Kl	1.55837	0.565124	1.28371	0.440228	0.659772	0.99994	L4/5 IT Glut	up
Jak3	2.98386	0.564417	0.954688	0.591206	0.554382	0.99994	L4/5 IT Glut	up
Rab9b	19.4366	0.56336	0.381358	1.47725	0.139609	0.99994	L4/5 IT Glut	up
Grp	2.34987	0.562173	1.10771	0.50751	0.611797	0.99994	L4/5 IT Glut	up
A930004D18Rik	3.06301	0.561494	0.960883	0.584352	0.558983	0.99994	L4/5 IT Glut	up
Tnfrsf9	3.53081	0.560274	0.956877	0.585524	0.558196	0.99994	L4/5 IT Glut	up
Cdh1	1.3296	0.558569	1.62142	0.344494	0.730475	0.99994	L4/5 IT Glut	up
Pcgf1	16.162	0.557957	0.421411	1.32402	0.185496	0.99994	L4/5 IT Glut	up
Tmem132e	15.9981	0.55682	0.419507	1.32732	0.184402	0.99994	L4/5 IT Glut	up
Psme1	15.073	0.556666	0.417869	1.33216	0.182809	0.99994	L4/5 IT Glut	up
As3mt	3.69222	0.556544	0.87989	0.632516	0.52705	0.99994	L4/5 IT Glut	up
Hebp2	2.99604	0.556434	0.960971	0.579033	0.562567	0.99994	L4/5 IT Glut	up
Cyb5rl	1.80798	0.555782	1.21912	0.45589	0.648469	0.99994	L4/5 IT Glut	up
Phldb2	26.9464	0.555396	0.328313	1.69166	0.0907102	0.99994	L4/5 IT Glut	up
Ackr3	1.56422	0.553697	1.32668	0.417356	0.676418	0.99994	L4/5 IT Glut	up
Shroom1	3.81804	0.55357	0.852518	0.649336	0.516122	0.99994	L4/5 IT Glut	up
Htr6	8.36729	0.553509	0.569069	0.972658	0.330724	0.99994	L4/5 IT Glut	up
Nbl1	10.8152	0.553286	0.50528	1.09501	0.273513	0.99994	L4/5 IT Glut	up
Brip1	6.99021	0.553144	0.605088	0.914154	0.360636	0.99994	L4/5 IT Glut	up
Acsm4	0.364287	0.553098	3.03246	0.182392	0.855275	0.99994	L4/5 IT Glut	up
Gja4	1.25994	0.552986	1.49108	0.370862	0.71074	0.99994	L4/5 IT Glut	up
Theg	1.07986	0.552752	1.59194	0.347218	0.728427	0.99994	L4/5 IT Glut	up
Emilin2	3.9438	0.552442	0.828239	0.667008	0.504767	0.99994	L4/5 IT Glut	up
Cacng5	0.413173	0.552232	2.89372	0.190838	0.848652	0.99994	L4/5 IT Glut	up
Hmga2	2.19321	0.551729	1.06486	0.518122	0.604373	0.99994	L4/5 IT Glut	up
Dmac1	6.67219	0.551354	0.680313	0.810443	0.417686	0.99994	L4/5 IT Glut	up
Pcdha8	3.42404	0.551338	0.860661	0.640599	0.521783	0.99994	L4/5 IT Glut	up
Ruvbl2	16.4431	0.550224	0.423669	1.29871	0.194043	0.99994	L4/5 IT Glut	up
Cntf	4.21512	0.550071	0.826879	0.665238	0.505898	0.99994	L4/5 IT Glut	up
Dnah3	9.0492	0.550069	0.540726	1.01728	0.309021	0.99994	L4/5 IT Glut	up
Prickle3	3.18083	0.549419	1.01274	0.542507	0.58747	0.99994	L4/5 IT Glut	up
Catsperg1	11.071	0.548815	0.485883	1.12952	0.258678	0.99994	L4/5 IT Glut	up
Hcn3	33.0016	0.548768	0.28433	1.93004	0.0536023	0.99994	L4/5 IT Glut	up
Faap100	37.6223	0.547842	0.308723	1.77454	0.0759737	0.99994	L4/5 IT Glut	up
Bcl11b	13.7315	0.547615	0.57107	0.958927	0.337596	0.99994	L4/5 IT Glut	up
Gm6657	0.780792	0.54726	1.94492	0.281379	0.77842	0.99994	L4/5 IT Glut	up
Ttc41	8.21916	0.54671	0.575041	0.950731	0.341741	0.99994	L4/5 IT Glut	up
Dmpk	17.8247	0.546645	0.400667	1.36434	0.172461	0.99994	L4/5 IT Glut	up
Rrh	3.62366	0.546573	0.94388	0.57907	0.562542	0.99994	L4/5 IT Glut	up
Zfp36l1	5.09041	0.54641	0.745025	0.733411	0.463308	0.99994	L4/5 IT Glut	up
Metrnl	7.80344	0.546234	0.569621	0.958943	0.337587	0.99994	L4/5 IT Glut	up
Gmnc	4.63013	0.546028	0.854682	0.638867	0.522909	0.99994	L4/5 IT Glut	up
Rnaset2a	3.82075	0.545262	0.830252	0.656742	0.511347	0.99994	L4/5 IT Glut	up
Stc2	0.960427	0.545016	1.83811	0.296508	0.766842	0.99994	L4/5 IT Glut	up
Trappc5	6.31873	0.544139	0.697647	0.779962	0.435413	0.99994	L4/5 IT Glut	up
Mavs	1.13649	0.54408	1.69162	0.321633	0.747731	0.99994	L4/5 IT Glut	up
Zfp85	8.53917	0.542876	0.605252	0.896942	0.36975	0.99994	L4/5 IT Glut	up
Zfp422	10.7267	0.541923	0.498976	1.08607	0.277447	0.99994	L4/5 IT Glut	up
Tspan15	16.562	0.541699	0.394206	1.37415	0.169394	0.99994	L4/5 IT Glut	up
Gm45902	17.4003	0.541542	0.385122	1.40616	0.159678	0.99994	L4/5 IT Glut	up
Vmn1r30	0.511408	0.541526	2.62884	0.205994	0.836795	0.99994	L4/5 IT Glut	up
Acot10	3.75651	0.541481	1.03272	0.524327	0.600051	0.99994	L4/5 IT Glut	up
Cst7	1.23908	0.541073	1.42487	0.379734	0.704143	0.99994	L4/5 IT Glut	up
Guca1b	3.98325	0.540835	0.830089	0.651539	0.514699	0.99994	L4/5 IT Glut	up
Map3k6	1.43943	0.540219	1.44484	0.373895	0.708483	0.99994	L4/5 IT Glut	up
Fbxo48	1.2431	0.539328	1.59112	0.338961	0.734639	0.99994	L4/5 IT Glut	up
Prlr	22.3316	0.539294	0.389803	1.3835	0.166511	0.99994	L4/5 IT Glut	up
4931414P19Rik	17.1703	0.538292	0.386417	1.39303	0.16361	0.99994	L4/5 IT Glut	up
Gsto2	7.45758	0.538185	0.604523	0.890263	0.373325	0.99994	L4/5 IT Glut	up
Reep6	2.79117	0.537138	1.17547	0.456957	0.647702	0.99994	L4/5 IT Glut	up
Cplx3	0.832309	0.53707	1.88903	0.28431	0.776173	0.99994	L4/5 IT Glut	up
Trim62	11.5848	0.537035	0.464334	1.15657	0.247448	0.99994	L4/5 IT Glut	up
Gm21976	0.871698	0.536897	1.76773	0.303721	0.76134	0.99994	L4/5 IT Glut	up
Fsbp	3.58885	0.536768	0.972732	0.551815	0.581075	0.99994	L4/5 IT Glut	up
Trim13	7.25041	0.536497	0.621176	0.86368	0.387764	0.99994	L4/5 IT Glut	up
Efnb1	16.7082	0.535923	0.413482	1.29612	0.194934	0.99994	L4/5 IT Glut	up
Ccdc85c	14.8131	0.535213	0.499625	1.07123	0.284066	0.99994	L4/5 IT Glut	up
Ubtd1	54.1126	0.534896	0.234117	2.28474	0.0223281	0.99994	L4/5 IT Glut	up
Klhl38	4.93736	0.534608	0.795419	0.672109	0.501514	0.99994	L4/5 IT Glut	up
Raet1e	0.540458	0.534414	2.2638	0.236069	0.813379	0.99994	L4/5 IT Glut	up
Dqx1	1.32174	0.534088	1.56998	0.340187	0.733716	0.99994	L4/5 IT Glut	up
Ass1	4.36762	0.533889	0.788541	0.677059	0.498368	0.99994	L4/5 IT Glut	up
Adra2c	8.25986	0.533308	0.59086	0.902597	0.36674	0.99994	L4/5 IT Glut	up
Rerg	1.65553	0.533263	1.37097	0.388969	0.697299	0.99994	L4/5 IT Glut	up
1700125H20Rik	1.34488	0.532948	1.44215	0.369552	0.711716	0.99994	L4/5 IT Glut	up
Gm17509	3.88807	0.532187	0.817772	0.650776	0.515191	0.99994	L4/5 IT Glut	up
Gm15319	2.96415	0.532176	0.996903	0.533829	0.59346	0.99994	L4/5 IT Glut	up
Dusp10	3.1353	0.529355	0.979463	0.540454	0.588884	0.99994	L4/5 IT Glut	up
Map10	1.77152	0.529335	1.21011	0.437428	0.661801	0.99994	L4/5 IT Glut	up
Triml2	0.590924	0.529026	2.33101	0.226952	0.820461	0.99994	L4/5 IT Glut	up
Car12	13.6958	0.52846	0.45187	1.16949	0.242205	0.99994	L4/5 IT Glut	up
Cd96	0.716662	0.527623	1.98657	0.265595	0.790551	0.99994	L4/5 IT Glut	up
Cbfa2t3	97.3772	0.527323	0.236082	2.23364	0.0255068	0.99994	L4/5 IT Glut	up
Pnma1	1.33852	0.526938	1.37593	0.382969	0.701743	0.99994	L4/5 IT Glut	up
Rom1	1.03423	0.526897	1.82203	0.289182	0.772442	0.99994	L4/5 IT Glut	up
Gm6592	1.44604	0.526816	1.3748	0.383194	0.701576	0.99994	L4/5 IT Glut	up
Casq2	0.281733	0.526411	3.12616	0.168389	0.866277	0.99994	L4/5 IT Glut	up
Lgr6	1.77423	0.525449	1.20311	0.436741	0.662299	0.99994	L4/5 IT Glut	up
Axdnd1	3.35172	0.525297	0.878532	0.597926	0.54989	0.99994	L4/5 IT Glut	up
Stag3	2.35767	0.52424	1.03843	0.504841	0.613671	0.99994	L4/5 IT Glut	up
Ccdc169	6.32106	0.524216	0.665887	0.787244	0.431139	0.99994	L4/5 IT Glut	up
Luzp2	107.371	0.523802	0.211502	2.47658	0.0132647	0.99994	L4/5 IT Glut	up
Lsp1	0.325028	0.5231	3.12588	0.167345	0.867099	0.99994	L4/5 IT Glut	up
Skint8	0.817019	0.52301	1.75905	0.297325	0.766219	0.99994	L4/5 IT Glut	up
Zfp623	11.9379	0.522949	0.510905	1.02358	0.306036	0.99994	L4/5 IT Glut	up
Ssc4d	5.08393	0.521989	0.718669	0.726327	0.467638	0.99994	L4/5 IT Glut	up
Fzd4	2.5939	0.521805	1.00395	0.519749	0.603238	0.99994	L4/5 IT Glut	up
Gm10762	5.5949313604907696	0.521194	0.739092	0.705182	0.480697	0.99994	L4/5 IT Glut	up
Brca1	5.25354	0.521024	0.697524	0.746962	0.455086	0.99994	L4/5 IT Glut	up
Csnka2ip	5.00425	0.52025	0.799639	0.650607	0.5153	0.99994	L4/5 IT Glut	up
Kcng3	64.283	0.52002	0.217172	2.3945	0.0166429	0.99994	L4/5 IT Glut	up
Glrp1	0.388667	0.519352	2.95994	0.17546	0.860718	0.99994	L4/5 IT Glut	up
Slc38a4	0.846629	0.518579	2.03764	0.254499	0.79911	0.99994	L4/5 IT Glut	up
Figla	0.685118	0.517769	1.93959	0.266948	0.789509	0.99994	L4/5 IT Glut	up
Cacng1	0.948087	0.516683	1.61492	0.319944	0.749011	0.99994	L4/5 IT Glut	up
C1qc	3.57969	0.516506	1.00362	0.514644	0.606802	0.99994	L4/5 IT Glut	up
Pqlc3	5.21833	0.515095	0.770785	0.668273	0.50396	0.99994	L4/5 IT Glut	up
Efhb	4.41078	0.515067	0.78268	0.658081	0.510486	0.99994	L4/5 IT Glut	up
Fes	0.701387	0.51461	2.17573	0.236523	0.813027	0.99994	L4/5 IT Glut	up
A530016L24Rik	3.13911	0.514559	0.910608	0.565073	0.572024	0.99994	L4/5 IT Glut	up
Hpn	22.6133	0.514275	0.350174	1.46863	0.141934	0.99994	L4/5 IT Glut	up
1190007I07Rik	17.59	0.513936	0.385951	1.33161	0.182989	0.99994	L4/5 IT Glut	up
Tnfaip8l1	10.1844	0.51366	0.510474	1.00624	0.3143	0.99994	L4/5 IT Glut	up
Sgcg	1.57239	0.513634	1.30048	0.394956	0.692875	0.99994	L4/5 IT Glut	up
Scin	0.846726	0.513254	2.04751	0.250672	0.802068	0.99994	L4/5 IT Glut	up
Myo3a	1.50504	0.512	1.44979	0.353153	0.723974	0.99994	L4/5 IT Glut	up
Lyzl4	266.758	0.511931	0.131977	3.87893	1.0491672994344e-4	0.251605	L4/5 IT Glut	up
Heyl	0.627828	0.511447	2.23459	0.228877	0.818964	0.99994	L4/5 IT Glut	up
Pfn4	3.62274	0.511175	0.89471	0.57133	0.567776	0.99994	L4/5 IT Glut	up
Mafk	3.59003	0.51083	0.884992	0.577215	0.563795	0.99994	L4/5 IT Glut	up
Gpt	7.65034	0.510373	0.5864	0.87035	0.384109	0.99994	L4/5 IT Glut	up
9030624G23Rik	14.693	0.509422	0.472348	1.07849	0.280816	0.99994	L4/5 IT Glut	up
Myh3	0.931232	0.50874	1.92717	0.263983	0.791793	0.99994	L4/5 IT Glut	up
Zg16	0.969419	0.507829	1.72884	0.29374	0.768956	0.99994	L4/5 IT Glut	up
Foxc1	2.05422	0.50757	1.11792	0.454032	0.649806	0.99994	L4/5 IT Glut	up
Ccdc88c	119.533	0.506513	0.180465	2.8067	0.00500513	0.99994	L4/5 IT Glut	up
Ctf2	2.0002	0.505818	1.14675	0.44109	0.659148	0.99994	L4/5 IT Glut	up
Tmem82	1.08189	0.505738	1.6089	0.314338	0.753264	0.99994	L4/5 IT Glut	up
Hba-a1	16.5666	0.505667	0.480886	1.05153	0.293014	0.99994	L4/5 IT Glut	up
Gm5108	3.31441	0.504232	0.92827	0.543196	0.586995	0.99994	L4/5 IT Glut	up
Ehd2	2.23052	0.50406	1.13393	0.444524	0.656664	0.99994	L4/5 IT Glut	up
Samd15	26.9883	0.504034	0.33361	1.51085	0.130826	0.99994	L4/5 IT Glut	up
Tmc4	40.0199	0.502647	0.275117	1.82703	0.0676955	0.99994	L4/5 IT Glut	up
Nlrc3	17.7037	0.502595	0.45486	1.10495	0.269183	0.99994	L4/5 IT Glut	up
Flt1	8.24657	0.501234	0.804769	0.62283	0.533396	0.99994	L4/5 IT Glut	up
Pkd1l1	0.990029	0.501164	1.73468	0.288908	0.772652	0.99994	L4/5 IT Glut	up
Ulbp1	1.24705	0.501147	1.48816	0.336755	0.736302	0.99994	L4/5 IT Glut	up
Gas2l3	2.04891	0.500714	1.20793	0.414521	0.678493	0.99994	L4/5 IT Glut	up
Bnc2	5.06741	0.500709	0.882031	0.567677	0.570254	0.99994	L4/5 IT Glut	up
Erich6	32.7272	0.500273	0.295867	1.69087	0.090861	0.99994	L4/5 IT Glut	up
Cetn4	18.9131	0.498409	0.386752	1.28871	0.1975	0.99994	L4/5 IT Glut	up
Ciita	12.0189	0.498091	0.512659	0.971583	0.331258	0.99994	L4/5 IT Glut	up
Clec14a	0.79999	0.497954	1.9203	0.25931	0.795396	0.99994	L4/5 IT Glut	up
Pdlim5	9.81956	0.497645	0.630065	0.789831	0.429626	0.99994	L4/5 IT Glut	up
Vill	31.5827	0.497356	0.331707	1.49938	0.133774	0.99994	L4/5 IT Glut	up
Rapgef3	26.8901	0.496616	0.343724	1.44481	0.148512	0.99994	L4/5 IT Glut	up
Zfp366	1.11723	0.496463	1.7209	0.288491	0.772971	0.99994	L4/5 IT Glut	up
Dynlrb2	0.455073	0.496339	2.55006	0.194639	0.845676	0.99994	L4/5 IT Glut	up
Slc22a27	0.404418	0.495638	2.91691	0.169919	0.865074	0.99994	L4/5 IT Glut	up
Lamb2	0.431001	0.49535	3.05545	0.16212	0.871211	0.99994	L4/5 IT Glut	up
Cdk15	1.3983	0.495214	1.43236	0.345732	0.729544	0.99994	L4/5 IT Glut	up
Notch1	1.45772	0.494937	1.34287	0.368566	0.712452	0.99994	L4/5 IT Glut	up
Otx1	1.39038	0.492731	1.62545	0.303135	0.761787	0.99994	L4/5 IT Glut	up
Mob3a	14.265	0.4925	0.441446	1.11565	0.264572	0.99994	L4/5 IT Glut	up
Cdc42ep1	1.52483	0.491975	1.35564	0.36291	0.716672	0.99994	L4/5 IT Glut	up
Prdm5	9.1216	0.491592	0.539664	0.910921	0.362337	0.99994	L4/5 IT Glut	up
Piga	22.3208	0.491487	0.363344	1.35268	0.176158	0.99994	L4/5 IT Glut	up
Npnt	40.6657	0.490721	0.29232	1.67871	0.093208	0.99994	L4/5 IT Glut	up
Mnd1	4.89227	0.490484	0.719664	0.681545	0.495526	0.99994	L4/5 IT Glut	up
Thsd7b	68.2645	0.490457	0.233081	2.10423	0.0353584	0.99994	L4/5 IT Glut	up
Pno1	12.9894	0.490352	0.457949	1.07076	0.284279	0.99994	L4/5 IT Glut	up
D030056L22Rik	16.8898	0.490322	0.413372	1.18615	0.235562	0.99994	L4/5 IT Glut	up
4930562C15Rik	1.6218	0.48931	1.27476	0.383844	0.701094	0.99994	L4/5 IT Glut	up
Hba-a2	13.5096	0.489177	0.526428	0.929239	0.352765	0.99994	L4/5 IT Glut	up
Tacr1	1.82214	0.489167	1.2262	0.398928	0.689946	0.99994	L4/5 IT Glut	up
Snx20	0.956329	0.488794	1.91962	0.254631	0.799008	0.99994	L4/5 IT Glut	up
Pdzd2	1286.36	0.487969	0.11935	4.08855	4.34079244365011e-5	0.145738	L4/5 IT Glut	up
Rpl41	74.1335	0.486953	0.286439	1.70002	0.0891263	0.99994	L4/5 IT Glut	up
Blvrb	5.97879	0.486817	0.710426	0.685246	0.493189	0.99994	L4/5 IT Glut	up
Cd93	1.6847	0.48679	1.30148	0.374028	0.708384	0.99994	L4/5 IT Glut	up
Slc11a1	0.519734	0.486688	2.28924	0.212598	0.83164	0.99994	L4/5 IT Glut	up
Rps19bp1	13.5206	0.486074	0.458797	1.05945	0.289394	0.99994	L4/5 IT Glut	up
Fam83b	4.26202	0.485815	0.911321	0.533088	0.593973	0.99994	L4/5 IT Glut	up
Hgh1	15.4184	0.485809	0.4188	1.16	0.246048	0.99994	L4/5 IT Glut	up
Eid3	3.15058	0.485365	0.95125	0.510239	0.609884	0.99994	L4/5 IT Glut	up
Casp1	3.08482	0.48478	0.935996	0.51793	0.604507	0.99994	L4/5 IT Glut	up
Ankrd53	1.43003	0.483274	1.31182	0.3684	0.712575	0.99994	L4/5 IT Glut	up
Sdk2	107.821	0.483164	0.197398	2.44766	0.0143785	0.99994	L4/5 IT Glut	up
Lrrc3	6.15202	0.483057	0.647211	0.746367	0.455446	0.99994	L4/5 IT Glut	up
Btbd17	1.23267	0.482997	1.78058	0.271259	0.786192	0.99994	L4/5 IT Glut	up
Kcnj12	27.8328	0.482799	0.335358	1.43965	0.149965	0.99994	L4/5 IT Glut	up
Agmo	6.04996	0.48249	0.799845	0.603229	0.546356	0.99994	L4/5 IT Glut	up
Col16a1	54.9554	0.481791	0.241814	1.9924	0.0463269	0.99994	L4/5 IT Glut	up
Ctxn3	6.52637	0.481412	0.671572	0.716844	0.47347	0.99994	L4/5 IT Glut	up
Cdh9	22.5219	0.480933	0.407983	1.1788	0.238476	0.99994	L4/5 IT Glut	up
Urod	8.8778	0.4801	0.583363	0.822986	0.410516	0.99994	L4/5 IT Glut	up
Ptgr1	0.660583	0.479455	2.37396	0.201965	0.839944	0.99994	L4/5 IT Glut	up
Gm3248	10.6629	0.478266	0.513092	0.932125	0.351272	0.99994	L4/5 IT Glut	up
Mxd3	1.1546	0.478102	1.52429	0.313656	0.753783	0.99994	L4/5 IT Glut	up
Gm31371	2.89824	0.47799	0.945522	0.505531	0.613186	0.99994	L4/5 IT Glut	up
Slco1a4	7.42908	0.477989	0.795404	0.600938	0.547881	0.99994	L4/5 IT Glut	up
Nek7	33.7489	0.477856	0.286594	1.66736	0.0954426	0.99994	L4/5 IT Glut	up
Gm4869	4.44527	0.477226	0.796474	0.599173	0.549057	0.99994	L4/5 IT Glut	up
Adamts5	7.39743	0.477059	0.600238	0.794783	0.42674	0.99994	L4/5 IT Glut	up
Cmtm3	0.668055	0.476821	2.3677	0.201386	0.840397	0.99994	L4/5 IT Glut	up
Mien1	8.93407	0.476407	0.668882	0.712243	0.476314	0.99994	L4/5 IT Glut	up
Cd37	0.784729	0.476288	1.83557	0.259477	0.795267	0.99994	L4/5 IT Glut	up
Eif6	12.643	0.476241	0.490657	0.970619	0.331738	0.99994	L4/5 IT Glut	up
Sgsm1	752.637	0.476007	0.476457	0.999057	0.317767	0.99994	L4/5 IT Glut	up
Apoa1	2.89145	0.475565	1.07176	0.443725	0.657241	0.99994	L4/5 IT Glut	up
Perm1	0.501424	0.475502	2.63348	0.18056	0.856713	0.99994	L4/5 IT Glut	up
Trappc3l	1.29755	0.475379	1.33633	0.355735	0.722039	0.99994	L4/5 IT Glut	up
Tns3	4.09944	0.475324	0.895282	0.530921	0.595474	0.99994	L4/5 IT Glut	up
Sh3tc2	2.47305	0.474679	1.18066	0.402044	0.687651	0.99994	L4/5 IT Glut	up
Cpne7	77.8587	0.474654	0.254918	1.86199	0.0626048	0.99994	L4/5 IT Glut	up
Rdh9	5.04123	0.474341	0.711656	0.666531	0.505071	0.99994	L4/5 IT Glut	up
Dsg2	16.3828	0.474227	0.433571	1.09377	0.274055	0.99994	L4/5 IT Glut	up
Rbp1	2.04949	0.473175	1.25112	0.378202	0.70528	0.99994	L4/5 IT Glut	up
Sorcs3	1643.64	0.472863	0.10369	4.56034	5.10707784762409e-6	0.0428663	L4/5 IT Glut	up
Fen1	4.11415	0.472679	0.783596	0.603217	0.546364	0.99994	L4/5 IT Glut	up
Bcan	1.16138	0.471902	1.9103	0.247031	0.804885	0.99994	L4/5 IT Glut	up
Vsx2	0.398622	0.470891	2.90762	0.16195	0.871345	0.99994	L4/5 IT Glut	up
Spata45	2.05644	0.470674	1.18975	0.395608	0.692394	0.99994	L4/5 IT Glut	up
Dctd	20.4032	0.470546	0.393007	1.1973	0.231191	0.99994	L4/5 IT Glut	up
Anapc13	13.3952	0.470308	0.462938	1.01592	0.309668	0.99994	L4/5 IT Glut	up
Arid5a	6.89127	0.470299	0.681354	0.690242	0.490042	0.99994	L4/5 IT Glut	up
Nr2f6	22.724	0.469407	0.365574	1.28403	0.199133	0.99994	L4/5 IT Glut	up
Cysltr1	0.782502	0.468908	2.04062	0.229787	0.818257	0.99994	L4/5 IT Glut	up
Utp3	28.7766	0.468325	0.328666	1.42493	0.154178	0.99994	L4/5 IT Glut	up
Serinc2	60.33	0.46802	0.232898	2.00955	0.044479	0.99994	L4/5 IT Glut	up
Phlda3	2.01463	0.467524	1.2962	0.360687	0.718333	0.99994	L4/5 IT Glut	up
Bpifb5	1.73603	0.467133	1.33692	0.349409	0.726782	0.99994	L4/5 IT Glut	up
Glipr1	9.79545	0.466086	0.52437	0.888851	0.374083	0.99994	L4/5 IT Glut	up
Veph1	0.580638	0.464997	2.16323	0.214955	0.829803	0.99994	L4/5 IT Glut	up
Rpp38	14.7292	0.464645	0.443633	1.04737	0.294931	0.99994	L4/5 IT Glut	up
Xrcc2	13.0057	0.464202	0.440568	1.05364	0.292046	0.99994	L4/5 IT Glut	up
Impg1	13.2786	0.463928	0.460584	1.00726	0.31381	0.99994	L4/5 IT Glut	up
Slco2b1	1.60884	0.462625	1.19369	0.38756	0.698342	0.99994	L4/5 IT Glut	up
Slc22a22	0.771873	0.462246	1.95407	0.236556	0.813001	0.99994	L4/5 IT Glut	up
Igflr1	23.6005	0.462095	0.361005	1.28002	0.200537	0.99994	L4/5 IT Glut	up
Knstrn	9.44936	0.462087	0.533146	0.866719	0.386096	0.99994	L4/5 IT Glut	up
Acsf2	0.696503	0.461914	2.31991	0.199109	0.842178	0.99994	L4/5 IT Glut	up
Kif2c	0.710334	0.46092	2.02885	0.227183	0.820281	0.99994	L4/5 IT Glut	up
Gsn	8.36656	0.460611	0.629753	0.731415	0.464526	0.99994	L4/5 IT Glut	up
Abi3bp	124.087	0.460501	0.227065	2.02805	0.0425549	0.99994	L4/5 IT Glut	up
S100a11	0.60178	0.460144	2.47495	0.18592	0.852507	0.99994	L4/5 IT Glut	up
Pgpep1l	2.60621	0.46002	1.1098	0.414509	0.678502	0.99994	L4/5 IT Glut	up
P3h1	30.7111	0.459273	0.300491	1.52841	0.12641	0.99994	L4/5 IT Glut	up
Nudt16	7.69237	0.458575	0.595482	0.770091	0.441246	0.99994	L4/5 IT Glut	up
Rcan3	2.5955	0.458558	0.997978	0.459487	0.645884	0.99994	L4/5 IT Glut	up
Henmt1	3.2247	0.458502	0.897119	0.511083	0.609293	0.99994	L4/5 IT Glut	up
Gadd45b	19.1998	0.457906	0.397802	1.15109	0.249695	0.99994	L4/5 IT Glut	up
Dlec1	9.23522	0.45736	0.563199	0.812075	0.416749	0.99994	L4/5 IT Glut	up
Slc39a8	6.49029	0.457275	0.657808	0.695151	0.486961	0.99994	L4/5 IT Glut	up
Spidr	4.95253	0.457057	0.738366	0.619011	0.535909	0.99994	L4/5 IT Glut	up
Gdpd5	238.309	0.456952	0.132812	3.44061	5.8040781090466e-4	0.649554	L4/5 IT Glut	up
C2cd4b	12.1635	0.456943	0.490535	0.931521	0.351584	0.99994	L4/5 IT Glut	up
Pheta1	14.3679	0.456542	0.436618	1.04563	0.295731	0.99994	L4/5 IT Glut	up
Klhl4	32.5391	0.456322	0.288148	1.58364	0.113275	0.99994	L4/5 IT Glut	up
Zfp41	4.19592	0.456117	0.796439	0.57269585192652706	0.566851	0.99994	L4/5 IT Glut	up
Ctsw	1.02864	0.455947	1.58868	0.286998	0.774114	0.99994	L4/5 IT Glut	up
Ada	3.31971	0.455755	0.913732	0.498784	0.617931	0.99994	L4/5 IT Glut	up
Pde10a	9049.7	0.453411	0.145738	3.11114	0.00186365	0.99994	L4/5 IT Glut	up
Cenpm	7.26113	0.453354	0.611634	0.741218	0.458562	0.99994	L4/5 IT Glut	up
Esr1	10.3817	0.453135	0.508537	0.891055	0.3729	0.99994	L4/5 IT Glut	up
Asf1b	2.65375	0.453132	1.06735	0.42454	0.671172	0.99994	L4/5 IT Glut	up
Pnldc1	42.282618704734404	0.45282	0.254515	1.77915	0.0752148	0.99994	L4/5 IT Glut	up
Tmppe	0.660099	0.452755	2.36757	0.191231	0.848344	0.99994	L4/5 IT Glut	up
Nr2f2	18.0713	0.452714	0.413493	1.09485	0.273581	0.99994	L4/5 IT Glut	up
Mcm10	7.16369	0.451628	0.601833	0.750421	0.453001	0.99994	L4/5 IT Glut	up
Gm10271	0.573078	0.45086	2.34231	0.192485	0.847362	0.99994	L4/5 IT Glut	up
Prss8	0.880461	0.450597	1.79399	0.251171	0.801682	0.99994	L4/5 IT Glut	up
Tnfrsf4	4.26244	0.450031	0.874046	0.514883	0.606635	0.99994	L4/5 IT Glut	up
Sh2b2	32.9937	0.449565	0.28625	1.57053	0.116291	0.99994	L4/5 IT Glut	up
Akip1	3.87791	0.449402	0.806766	0.557042	0.577499	0.99994	L4/5 IT Glut	up
Prkce	2740.69	0.449261	0.109498	4.1029	4.08001566034889e-5	0.145738	L4/5 IT Glut	up
Tesc	34.8553	0.449232	0.284609	1.57841	0.11447	0.99994	L4/5 IT Glut	up
Acsm3	1.63661	0.449096	1.34929	0.33284	0.739255	0.99994	L4/5 IT Glut	up
Prss36	32.8468	0.448372	0.305062	1.46977	0.141624	0.99994	L4/5 IT Glut	up
Dsc2	4.46091	0.448117	0.78263	0.572579	0.56693	0.99994	L4/5 IT Glut	up
Olfr1431	1.60441	0.447942	1.39188	0.321825	0.747586	0.99994	L4/5 IT Glut	up
Trpc5os	4.47505	0.447883	0.788677	0.567892	0.570108	0.99994	L4/5 IT Glut	up
Sec61b	19.436	0.447807	0.398171	1.12466	0.260733	0.99994	L4/5 IT Glut	up
Glis1	41.1789	0.446279	0.259384	1.72054	0.085335	0.99994	L4/5 IT Glut	up
Tead2	2.01217	0.446043	1.23068	0.362435	0.717027	0.99994	L4/5 IT Glut	up
Sstr2	20.3544	0.445978	0.358686	1.24337	0.213732	0.99994	L4/5 IT Glut	up
Tbc1d4	23.8931	0.445805	0.385731	1.15574	0.247787	0.99994	L4/5 IT Glut	up
Spag4	16.4961	0.445203	0.399823	1.1135	0.265493	0.99994	L4/5 IT Glut	up
Ifitm3	2.89021	0.444856	3.05156	0.14578	0.884095	0.99994	L4/5 IT Glut	up
Nxph1	49.5531	0.444634	0.3461	1.2847	0.198898	0.99994	L4/5 IT Glut	up
Tmod4	0.776773	0.444523	1.87431	0.237166	0.812528	0.99994	L4/5 IT Glut	up
Prss22	2.78873	0.4444	1.03591	0.428994	0.667927	0.99994	L4/5 IT Glut	up
Paqr5	2.45635	0.44391	1.10564	0.40149723278662097	0.688054	0.99994	L4/5 IT Glut	up
Ccdc17	4.8882	0.443694	0.770705	0.575699	0.564818	0.99994	L4/5 IT Glut	up
Antxr2	112.15	0.443681	0.2056	2.15798	0.0309291	0.99994	L4/5 IT Glut	up
Gm13199	3.49874	0.443242	0.911056	0.486515	0.626602	0.99994	L4/5 IT Glut	up
Fhod1	12.3564	0.442183	0.464156	0.952659	0.340763	0.99994	L4/5 IT Glut	up
Mroh5	16.164	0.442041	0.403617	1.0952	0.273429	0.99994	L4/5 IT Glut	up
Taf1c	30.6207	0.441747	0.309312	1.42816	0.153245	0.99994	L4/5 IT Glut	up
C1qa	2.69905	0.441605	1.12618	0.392128	0.694964	0.99994	L4/5 IT Glut	up
Lag3	1.04271	0.440247	1.72777	0.254807	0.798872	0.99994	L4/5 IT Glut	up
Boll	4.19324	0.4399	0.775793	0.567034	0.570691	0.99994	L4/5 IT Glut	up
Ap5z1	40.8301	0.439846	0.271113	1.62237	0.104724	0.99994	L4/5 IT Glut	up
Doc2b	3.98923	0.439648	0.796096	0.552255	0.580774	0.99994	L4/5 IT Glut	up
Nde1	2.12962	0.439518	1.21444	0.361909	0.71742	0.99994	L4/5 IT Glut	up
Kcnh6	4.48539	0.437826	0.794955	0.550756	0.581801	0.99994	L4/5 IT Glut	up
Gm3411	0.742329	0.437449	1.9058	0.229535	0.818453	0.99994	L4/5 IT Glut	up
Ube2t	2.95417	0.437384	0.961783	0.454764	0.649279	0.99994	L4/5 IT Glut	up
Gpr34	12.7445	0.437292	0.466995	0.936397	0.349069	0.99994	L4/5 IT Glut	up
Mreg	30.2595	0.437114	0.316432	1.38138	0.167161	0.99994	L4/5 IT Glut	up
Zfp830	17.2225	0.437049	0.40691	1.07407	0.282793	0.99994	L4/5 IT Glut	up
Rhov	1.49483	0.436593	1.30274	0.335135	0.737524	0.99994	L4/5 IT Glut	up
Prrx2	1.72715	0.436374	1.29831	0.33611	0.736788	0.99994	L4/5 IT Glut	up
Gm10406	16.2987	0.435981	0.417019	1.04547	0.295805	0.99994	L4/5 IT Glut	up
Dpm3	14.83	0.435764	0.462386	0.942426	0.345975	0.99994	L4/5 IT Glut	up
Acad12	17.7807	0.435755	0.387101	1.12569	0.260297	0.99994	L4/5 IT Glut	up
Ssxb5	0.794064	0.435531	1.85709	0.234523	0.814579	0.99994	L4/5 IT Glut	up
Shroom3	39.1392	0.434039	0.270501	1.60457	0.108587	0.99994	L4/5 IT Glut	up
S1pr5	1.53663	0.433897	1.35926	0.319217	0.749562	0.99994	L4/5 IT Glut	up
Prg4	1.58171	0.433803	1.4021	0.309396	0.757021	0.99994	L4/5 IT Glut	up
Scube3	19.6217	0.433743	0.365788	1.18578	0.23571	0.99994	L4/5 IT Glut	up
Kcns2	36.4777	0.433688	0.283417	1.53021	0.125964	0.99994	L4/5 IT Glut	up
Sfn	0.862454	0.433678	1.96935	0.220214	0.825705	0.99994	L4/5 IT Glut	up
Ndufa2	25.7954	0.433428	0.399418	1.08515	0.277857	0.99994	L4/5 IT Glut	up
Trmt112	24.6802	0.433352	0.374225	1.158	0.246866	0.99994	L4/5 IT Glut	up
Xkr9	0.373017	0.432943	2.99071	0.144762	0.884898	0.99994	L4/5 IT Glut	up
Tbx3	0.851489	0.432614	2.01629	0.214559	0.830111	0.99994	L4/5 IT Glut	up
Cpxm1	10.0195	0.432606	0.534905	0.808752	0.418658	0.99994	L4/5 IT Glut	up
Tada2b	15.4896	0.432384	0.414231	1.04382	0.296567	0.99994	L4/5 IT Glut	up
Hscb	23.4241	0.431958	0.367306	1.17602	0.239588	0.99994	L4/5 IT Glut	up
Zfp454	7.4387	0.431919	0.588036	0.734512	0.462637	0.99994	L4/5 IT Glut	up
Slc9a4	0.607702	0.431916	2.16938	0.199096	0.842187	0.99994	L4/5 IT Glut	up
Jmjd6	43.5542	0.431707	0.266338	1.6209	0.10504	0.99994	L4/5 IT Glut	up
Vmn1r183	0.549558	0.430788	2.35855	0.182649	0.855073	0.99994	L4/5 IT Glut	up
Vmac	7.49363	0.429706	0.651149	0.659919	0.509306	0.99994	L4/5 IT Glut	up
Mapk4	1457.09	0.429331	0.150205	2.8583	0.00425912	0.99994	L4/5 IT Glut	up
Rpl3l	1.3556	0.428266	1.60463	0.266894	0.789551	0.99994	L4/5 IT Glut	up
Fgd6	11.207	0.428081	0.52564	0.814399	0.415417	0.99994	L4/5 IT Glut	up
Col11a2	3.5718	0.428073	0.883771	0.484371	0.628123	0.99994	L4/5 IT Glut	up
Myom3	0.734857	0.428017	1.8735	0.228459	0.819289	0.99994	L4/5 IT Glut	up
Gm7697	1.37408	0.427868	1.32345	0.323298	0.746469	0.99994	L4/5 IT Glut	up
Dnpep	12.9725	0.427817	0.462109	0.925792	0.354554	0.99994	L4/5 IT Glut	up
Slc9a5	163.439	0.427294	0.172675	2.47456	0.01334	0.99994	L4/5 IT Glut	up
Olfr558	0.635665	0.426873	2.26849	0.188175	0.850739	0.99994	L4/5 IT Glut	up
Trp53tg5	0.289689	0.426852	3.12132	0.136753	0.891226	0.99994	L4/5 IT Glut	up
Rasl2-9	0.289689	0.426852	3.12132	0.136753	0.891226	0.99994	L4/5 IT Glut	up
Tmem202	7.8053	0.426106	0.574424	0.741798	0.45821	0.99994	L4/5 IT Glut	up
Sdsl	0.416312	0.425155	2.86311	0.148494	0.881953	0.99994	L4/5 IT Glut	up
Nrm	7.65148	0.424996	0.617208	0.688577	0.491089	0.99994	L4/5 IT Glut	up
Slc39a12	6.6784	0.424643	0.696924	0.60931	0.542319	0.99994	L4/5 IT Glut	up
Gpr35	6.5445	0.424538	0.608509	0.697669	0.485384	0.99994	L4/5 IT Glut	up
Teddm1a	0.332984	0.423853	3.121	0.135807	0.891974	0.99994	L4/5 IT Glut	up
Aqp7	0.332984	0.423853	3.121	0.135807	0.891974	0.99994	L4/5 IT Glut	up
Plac1	0.332984	0.423853	3.121	0.135807	0.891974	0.99994	L4/5 IT Glut	up
Rab3b	14.3988	0.423833	0.451179	0.939391	0.34753	0.99994	L4/5 IT Glut	up
Olfr878	1.7792	0.423231	1.27593	0.331704	0.740113	0.99994	L4/5 IT Glut	up
Dll3	0.641362	0.422773	2.23204	0.189411	0.849771	0.99994	L4/5 IT Glut	up
Lemd1	139.947	0.422734	0.194765	2.17048	0.0299705	0.99994	L4/5 IT Glut	up
Ust	106.387	0.422719	0.213312	1.98169	0.0475138	0.99994	L4/5 IT Glut	up
Ppm1h	1709.06	0.422582	0.108852	3.88218	1.0352625820205e-4	0.251605	L4/5 IT Glut	up
Itga9	10.5857	0.421891	0.5176	0.815091	0.41502	0.99994	L4/5 IT Glut	up
Tfeb	11.2386	0.421817	0.48511	0.869529	0.38455812103375703	0.99994	L4/5 IT Glut	up
Mamdc2	243.592	0.421556	0.141922	2.97034	0.00297469	0.99994	L4/5 IT Glut	up
Rcn1	6.27982	0.420473	0.664054	0.633191	0.526609	0.99994	L4/5 IT Glut	up
Pak4	6.23353	0.420367	0.685412	0.613306	0.539674	0.99994	L4/5 IT Glut	up
Aplnr	0.584049	0.419801	2.30539	0.182096	0.855508	0.99994	L4/5 IT Glut	up
Csad	188.928	0.419348	0.14692	2.85425	0.00431381	0.99994	L4/5 IT Glut	up
Vsir	0.846849	0.419107	1.90092	0.220475	0.825501	0.99994	L4/5 IT Glut	up
Rassf5	56.2081	0.418061	0.241353	1.73216	0.0832456	0.99994	L4/5 IT Glut	up
Galnt7	436.71	0.417483	0.164198	2.54255	0.0110046	0.99994	L4/5 IT Glut	up
Sema4a	152.541	0.41747	0.15209	2.74489	0.00605317	0.99994	L4/5 IT Glut	up
Pbld1	5.3463	0.417352	0.685046	0.609232	0.542371	0.99994	L4/5 IT Glut	up
Rdh16	3.02414	0.417083	0.967128	0.431259	0.66628	0.99994	L4/5 IT Glut	up
Igfbp7	78.9226	0.416866	0.237869	1.75251	0.0796867	0.99994	L4/5 IT Glut	up
Il31ra	2.08249	0.416865	1.23166	0.338458	0.735018	0.99994	L4/5 IT Glut	up
Podxl	25.8713	0.41649	0.33083	1.25893	0.208057	0.99994	L4/5 IT Glut	up
Mfsd4b1	5.86612	0.416221	0.707142	0.588596	0.556132	0.99994	L4/5 IT Glut	up
4921536K21Rik	0.781543	0.414827	1.98275	0.209218	0.834278	0.99994	L4/5 IT Glut	up
Pafah1b3	3.8495	0.41443	0.908202	0.45632	0.64816	0.99994	L4/5 IT Glut	up
Sytl1	15.4399	0.413843	0.426808	0.969624	0.332234	0.99994	L4/5 IT Glut	up
Pcdhac1	1.94595	0.41358	1.1497	0.359728	0.71905	0.99994	L4/5 IT Glut	up
Plpp3	45.4946	0.413546	0.265453	1.55789	0.11926	0.99994	L4/5 IT Glut	up
Cst6	3.01539	0.413428	1.1134	0.371321	0.710399	0.99994	L4/5 IT Glut	up
Tmem184c	60.5313	0.413289	0.217788	1.89767	0.0577399	0.99994	L4/5 IT Glut	up
Cdyl2	610.716	0.413154	0.298207	1.38546	0.165911	0.99994	L4/5 IT Glut	up
Ndrg2	28.7284	0.412884	0.436824	0.945196	0.344559	0.99994	L4/5 IT Glut	up
Mrm2	12.0578	0.412482	0.500948	0.823403	0.410279	0.99994	L4/5 IT Glut	up
Gpr157	2.73721	0.412173	1.00943	0.408322	0.683037	0.99994	L4/5 IT Glut	up
Abracl	50.2397	0.411978	0.260619	1.58077	0.113931	0.99994	L4/5 IT Glut	up
Ecm1	11.1013	0.411883	0.477976	0.861724	0.38884	0.99994	L4/5 IT Glut	up
Nek8	1.47885	0.410086	1.41845	0.28911	0.772497	0.99994	L4/5 IT Glut	up
Lrrc47	28.1959	0.409108	0.33222	1.23144	0.218159	0.99994	L4/5 IT Glut	up
Adam19	128.26	0.408788	0.209627	1.95007	0.051168	0.99994	L4/5 IT Glut	up
Cdk9	361.722	0.408675	0.121972	3.35055	8.06511073915e-4	0.752161	L4/5 IT Glut	up
Slc12a7	0.349423	0.408544	3.11892	0.130989	0.895784	0.99994	L4/5 IT Glut	up
Sel1l2	1.66627	0.408297	1.31646	0.310147	0.756449	0.99994	L4/5 IT Glut	up
Pemt	11.5645	0.408061	0.501807	0.813184	0.416113	0.99994	L4/5 IT Glut	up
Exd1	8.83692	0.407911	0.554845	0.73518	0.46223	0.99994	L4/5 IT Glut	up
Enpp3	0.309088	0.407723	3.11884	0.130729	0.89599	0.99994	L4/5 IT Glut	up
Ctdsp1	6.95474	0.407718	0.635035	0.64204	0.520847	0.99994	L4/5 IT Glut	up
BC051019	0.314932	0.407665	3.11697	0.130789	0.895942	0.99994	L4/5 IT Glut	up
Csn3	0.314932	0.407665	3.11697	0.130789	0.895942	0.99994	L4/5 IT Glut	up
Olfr1428	0.314932	0.407665	3.11697	0.130789	0.895942	0.99994	L4/5 IT Glut	up
Gm2115	9.95322	0.407594	0.58137	0.701092	0.483246	0.99994	L4/5 IT Glut	up
Crabp2	0.71371	0.407172	2.16486	0.188083	0.850812	0.99994	L4/5 IT Glut	up
Tubb2b	11.5626	0.407102	0.532859	0.763996	0.44487	0.99994	L4/5 IT Glut	up
Ankrd55	1.50705	0.407097	3.06756	0.13271	0.894422	0.99994	L4/5 IT Glut	up
Taf5	37.9039	0.406621	0.281066	1.44671	0.147978	0.99994	L4/5 IT Glut	up
D930020B18Rik	2.78717	0.406498	1.02851	0.395229	0.692674	0.99994	L4/5 IT Glut	up
Dusp23	4.84804	0.406307	0.748004	0.543187	0.587001	0.99994	L4/5 IT Glut	up
Scd3	3.14127	0.405494	0.990232	0.409494	0.682177	0.99994	L4/5 IT Glut	up
Commd2	29.0307	0.405445	0.351826	1.1524	0.249156	0.99994	L4/5 IT Glut	up
Rpl18	26.605	0.405438	0.422191	0.960319	0.336895	0.99994	L4/5 IT Glut	up
Lrrc10b	0.998311	0.404553	1.89843	0.213099	0.83125	0.99994	L4/5 IT Glut	up
Dhrs13	2.69184	0.404533	0.995674	0.406291	0.684529	0.99994	L4/5 IT Glut	up
Car5a	0.483792	0.404359	2.31708	0.174513	0.861463	0.99994	L4/5 IT Glut	up
Gstt3	0.483792	0.404359	2.31708	0.174513	0.861463	0.99994	L4/5 IT Glut	up
Ripor3	0.939556	0.404255	1.77863	0.227284	0.820203	0.99994	L4/5 IT Glut	up
Gfap	7.49305	0.402634	0.663233	0.607079	0.543799	0.99994	L4/5 IT Glut	up
Pdia5	38.5358	0.402417	0.273095	1.47354	0.140605	0.99994	L4/5 IT Glut	up
Abca9	4.32612	0.402196	0.852718	0.471663	0.637167	0.99994	L4/5 IT Glut	up
Ier5l	40.6726	0.402119	0.281325	1.42938	0.152896	0.99994	L4/5 IT Glut	up
S100a7a	3.26698	0.401942	0.861848	0.466372	0.640949	0.99994	L4/5 IT Glut	up
Txnl4b	5.52126	0.401901	0.757857	0.530313	0.595895	0.99994	L4/5 IT Glut	up
Akt2	134.841	0.401871	0.161932	2.48172	0.013075	0.99994	L4/5 IT Glut	up
Nme6	19.2936	0.401759	0.398175	1.009	0.312974	0.99994	L4/5 IT Glut	up
Gins1	9.31105	0.401015	0.519983	0.771207	0.440584	0.99994	L4/5 IT Glut	up
Hrh2	130.997	0.400923	0.184287	2.17554	0.0295898	0.99994	L4/5 IT Glut	up
Fam161a	3.52365	0.400409	0.895088	0.44734	0.65463	0.99994	L4/5 IT Glut	up
Ckap4	16.7304	0.400092	0.410892	0.973717	0.330197	0.99994	L4/5 IT Glut	up
Mul1	30.9737	0.399935	0.302452	1.32231	0.186066	0.99994	L4/5 IT Glut	up
Wwc1	277.654	0.39989	0.162315	2.46367	0.0137521	0.99994	L4/5 IT Glut	up
Mmgt2	18.8881	0.399434	0.383178	1.04242	0.297215	0.99994	L4/5 IT Glut	up
F8a	9.83913	0.399431	0.546734	0.730577	0.465038	0.99994	L4/5 IT Glut	up
Tmem177	5.04125	0.399187	0.732399	0.545041	0.585726	0.99994	L4/5 IT Glut	up
Ifit3	2.23537	0.398804	1.08853	0.366369	0.71409	0.99994	L4/5 IT Glut	up
Ddx4	19.3171	0.398307	0.381622	1.04372	0.296615	0.99994	L4/5 IT Glut	up
Ccdc163	18.0393	0.397921	0.385522	1.03216	0.301996	0.99994	L4/5 IT Glut	up
Tspan12	9.05491	0.39748	0.566553	0.701576	0.482944	0.99994	L4/5 IT Glut	up
Cmc2	37.6034	0.397219	0.326542	1.21644	0.223816	0.99994	L4/5 IT Glut	up
Ahdc1	307.789	0.396597	0.13691	2.89677	0.00377027	0.99994	L4/5 IT Glut	up
Sdr42e1	9.46572	0.396363	0.558216	0.710053	0.477671	0.99994	L4/5 IT Glut	up
Dock6	3.5908	0.395806	0.882734	0.448387	0.653874	0.99994	L4/5 IT Glut	up
Pcdhb9	4.51294	0.395805	0.796682	0.496816	0.619319	0.99994	L4/5 IT Glut	up
Igf2	0.301132	0.395703	3.11714	0.126944	0.89898475339958706	0.99994	L4/5 IT Glut	up
Pik3cg	0.301132	0.395703	3.11714	0.126944	0.89898475339958706	0.99994	L4/5 IT Glut	up
Dazl	12.4236	0.395311	0.465219	0.849729	0.395476	0.99994	L4/5 IT Glut	up
Smyd1	8.97127	0.395126	0.580503	0.680662	0.496085	0.99994	L4/5 IT Glut	up
Zfp781	11.4855	0.394611	0.478431	0.824802	0.409484	0.99994	L4/5 IT Glut	up
Hhipl1	26.6279	0.394507	0.328947	1.1993	0.23041	0.99994	L4/5 IT Glut	up
Man2b2	6.41712	0.394451	0.669863	0.588854	0.555959	0.99994	L4/5 IT Glut	up
Jagn1	36.2459	0.394076	0.290576	1.35619	0.175039	0.99994	L4/5 IT Glut	up
Clec10a	0.46816	0.394023	2.53929	0.155171	0.876687	0.99994	L4/5 IT Glut	up
Olfr986	1.0719	0.393293	1.93631	0.203115	0.839045	0.99994	L4/5 IT Glut	up
Hyal3	2.93545	0.393235	0.976498	0.402699	0.687169	0.99994	L4/5 IT Glut	up
4930546C10Rik	0.837328	0.392752	1.76456	0.222578	0.823864	0.99994	L4/5 IT Glut	up
Ormdl1	11.9539	0.392663	0.472793	0.830519	0.406246	0.99994	L4/5 IT Glut	up
Cdpf1	7.28231	0.392591	0.663374	0.59181	0.553978	0.99994	L4/5 IT Glut	up
H2-M3	2.76019	0.392185	0.941483	0.416561	0.676999	0.99994	L4/5 IT Glut	up
Pih1d2	7.98568	0.391941	0.607367	0.645311	0.518725	0.99994	L4/5 IT Glut	up
Pdlim1	19.7092	0.391368	0.376343	1.03992	0.298375	0.99994	L4/5 IT Glut	up
Muc13	0.475955	0.391286	2.33264	0.167744	0.866785	0.99994	L4/5 IT Glut	up
Kit	10.9112	0.391142	0.528752	0.739746	0.459454	0.99994	L4/5 IT Glut	up
Fgfbp3	11.5813	0.390928	0.52901	0.73898	0.459919	0.99994	L4/5 IT Glut	up
Aprt	12.3067	0.390664	0.499035	0.782839	0.433722	0.99994	L4/5 IT Glut	up
Syt9	65.1538	0.38998	0.255977	1.52349	0.127635	0.99994	L4/5 IT Glut	up
Mrpl51	19.2966	0.38967	0.405182	0.961717	0.336192	0.99994	L4/5 IT Glut	up
Gm16253	2.17977	0.389524	1.18884	0.32765	0.743177	0.99994	L4/5 IT Glut	up
Ppfibp2	22.1783	0.389471	0.369691	1.0535	0.29211	0.99994	L4/5 IT Glut	up
Colgalt2	5.93756	0.389219	0.655084	0.594151	0.552411	0.99994	L4/5 IT Glut	up
Arhgef40	4.6972	0.388996	0.876881	0.443613	0.657323	0.99994	L4/5 IT Glut	up
Gm42791	1.49725	0.388819	1.28541	0.302487	0.762281	0.99994	L4/5 IT Glut	up
Rgs2	46.7759	0.387966	0.260107	1.49156	0.135814	0.99994	L4/5 IT Glut	up
Alg3	14.6183	0.387856	0.479513	0.808854	0.418599	0.99994	L4/5 IT Glut	up
Gbp6	0.874266	0.387741	1.98264	0.195568	0.844948	0.99994	L4/5 IT Glut	up
Foxp2	51.5125	0.387076	0.289552	1.33681	0.181285	0.99994	L4/5 IT Glut	up
Tmem129	10.4718	0.386794	0.52137	0.74188	0.45816	0.99994	L4/5 IT Glut	up
Zbtb10	63.4354	0.386676	0.226583	1.70655	0.0879048	0.99994	L4/5 IT Glut	up
Gm9970	2.29962	0.385671	1.14059	0.338132	0.735264	0.99994	L4/5 IT Glut	up
Serpinf1	0.99563	0.385375	1.61611	0.238458	0.811526	0.99994	L4/5 IT Glut	up
Plscr3	65.7375	0.384958	0.223793	1.72015	0.085405	0.99994	L4/5 IT Glut	up
Amotl2	13.8676	0.384928	0.440351	0.874138	0.382043	0.99994	L4/5 IT Glut	up
Cyp2j12	1.57044	0.384667	1.38527	0.277683	0.781255	0.99994	L4/5 IT Glut	up
Tlr7	3.27774	0.384639	0.853927	0.450436	0.652396	0.99994	L4/5 IT Glut	up
Ccdc74a	9.65565	0.384288	0.530037	0.725021	0.468439	0.99994	L4/5 IT Glut	up
Pld1	3.24974	0.384257	0.934212	0.411316	0.680841	0.99994	L4/5 IT Glut	up
Zdhhc12	2.62305	0.383948	1.22788	0.312692	0.754515	0.99994	L4/5 IT Glut	up
Nudt18	12.4177	0.38361	0.533077	0.719615	0.471762	0.99994	L4/5 IT Glut	up
Uqcc3	5.67898	0.383578	0.740983	0.517661	0.604695	0.99994	L4/5 IT Glut	up
D11Wsu47e	17.5635	0.383061	0.389525	0.983405	0.325408	0.99994	L4/5 IT Glut	up
Epas1	6.55808	0.382833	0.810414	0.472392	0.636647	0.99994	L4/5 IT Glut	up
Ppm1f	101.417	0.382429	0.182936	2.0905	0.0365728	0.99994	L4/5 IT Glut	up
Tbx21	0.56712	0.38226	2.19974	0.173775	0.862042	0.99994	L4/5 IT Glut	up
Mgst2	0.584227	0.381594	2.37561	0.16063	0.872385	0.99994	L4/5 IT Glut	up
Hjurp	230.955	0.38125	0.134429	2.83607	0.00456731	0.99994	L4/5 IT Glut	up
Mtcp1	22.0801	0.381184	0.357205	1.06713	0.285914	0.99994	L4/5 IT Glut	up
Gm9903	1.22492	0.380999	1.46149	0.260692	0.79433	0.99994	L4/5 IT Glut	up
Slc10a3	6.20851	0.380378	0.643142	0.591437	0.554227	0.99994	L4/5 IT Glut	up
Dbnl	63.4134	0.380364	0.217152	1.7516	0.0798419	0.99994	L4/5 IT Glut	up
Bola2	10.5084	0.379713	0.654396	0.58025	0.561746	0.99994	L4/5 IT Glut	up
Cyp2u1	33.3808	0.379704	0.318855	1.19084	0.233718	0.99994	L4/5 IT Glut	up
Ppp1r37	249.137	0.379257	0.134219	2.82566	0.00471831	0.99994	L4/5 IT Glut	up
Ccdc60	5.90087	0.378863	0.681183	0.556184	0.578085	0.99994	L4/5 IT Glut	up
Snapc2	15.2585	0.378572	0.437167	0.865967	0.386508	0.99994	L4/5 IT Glut	up
Pld6	1.34588	0.378112	1.45068	0.260645	0.794366	0.99994	L4/5 IT Glut	up
Nrsn2	7.03816	0.377859	0.755735	0.499988	0.617083	0.99994	L4/5 IT Glut	up
Vmn1r218	2.42175	0.377697	1.22287	0.308861	0.757427	0.99994	L4/5 IT Glut	up
Dusp13	2.6821	0.377038	1.03797	0.363246	0.716421	0.99994	L4/5 IT Glut	up
Ntn3	31.9359	0.376935	0.293318	1.28507	0.198768	0.99994	L4/5 IT Glut	up
Zfp235	29.7595	0.376307	0.315826	1.1915	0.233457	0.99994	L4/5 IT Glut	up
Smo	1.15117	0.376294	1.58299	0.237711	0.812105	0.99994	L4/5 IT Glut	up
Gsg1l	283.033	0.376157	0.133162	2.82482	0.00473075	0.99994	L4/5 IT Glut	up
Islr	4.60643	0.375508	0.770322	0.487469	0.625926	0.99994	L4/5 IT Glut	up
Hdac10	13.4203	0.37522	0.460189	0.815362	0.414865	0.99994	L4/5 IT Glut	up
Chml	33.8662	0.375017	0.294362	1.274	0.202664	0.99994	L4/5 IT Glut	up
AW011738	4.09801	0.374884	0.827407	0.453082	0.65049	0.99994	L4/5 IT Glut	up
Itpk1	165.401	0.37473	0.160429	2.3358	0.0195016	0.99994	L4/5 IT Glut	up
Sh3bgr	1.73191	0.374715	1.23265	0.30399	0.761135	0.99994	L4/5 IT Glut	up
Uqcr10	29.7421	0.374339	0.418051	0.895439	0.370552	0.99994	L4/5 IT Glut	up
Ntng2	362.777	0.374277	0.155867	2.40125	0.0163392	0.99994	L4/5 IT Glut	up
Slco3a1	357.63	0.374198	0.12749	2.93511	0.00333431	0.99994	L4/5 IT Glut	up
Unc13d	5.18963	0.374187	0.782119	0.478427	0.632346	0.99994	L4/5 IT Glut	up
Oprd1	58.9932	0.374153	0.25749	1.45308	0.146202	0.99994	L4/5 IT Glut	up
Tapbpl	6.99333	0.374126	0.657049	0.569403	0.569082	0.99994	L4/5 IT Glut	up
Pcdhga7	9.10641	0.37399	0.547969	0.682502	0.494921	0.99994	L4/5 IT Glut	up
Ogfr	19.8359	0.373441	0.369973	1.00937	0.312796	0.99994	L4/5 IT Glut	up
Map3k1	5.38702	0.372898	0.714328	0.522026	0.601652	0.99994	L4/5 IT Glut	up
Psma8	0.76403	0.372873	2.01092	0.185424	0.852896	0.99994	L4/5 IT Glut	up
Shisa6	760.625	0.372313	0.149454	2.49116	0.0127327	0.99994	L4/5 IT Glut	up
Zcwpw1	30.1929	0.372181	0.302579	1.23003	0.218686	0.99994	L4/5 IT Glut	up
Aifm2	1.45297	0.372134	1.42051	0.261972	0.793343	0.99994	L4/5 IT Glut	up
Slc26a4	23.725	0.372133	0.372511	0.998984	0.317802	0.99994	L4/5 IT Glut	up
Smim26	15.257971076462301	0.372003	0.444354	0.837176	0.402493	0.99994	L4/5 IT Glut	up
Arsi	4.47136	0.371696	0.755249	0.492151	0.622613	0.99994	L4/5 IT Glut	up
Lrrtm3	1262.96	0.371374	0.121805	3.04893	0.00229655	0.99994	L4/5 IT Glut	up
Carmil2	20.502	0.371301	0.37731	0.984073	0.32508	0.99994	L4/5 IT Glut	up
Agpat1	33.3014	0.371213	0.29924	1.24052	0.214782	0.99994	L4/5 IT Glut	up
Nqo1	4.06119	0.370546	0.789804	0.469162	0.638953	0.99994	L4/5 IT Glut	up
Dhx58	6.40305	0.370272	0.631471	0.586365	0.55763	0.99994	L4/5 IT Glut	up
2610001J05Rik	13.3799	0.370221	0.467872	0.791287	0.428777	0.99994	L4/5 IT Glut	up
Insc	1.20339	0.370042	1.55148	0.238509	0.811486	0.99994	L4/5 IT Glut	up
Tmem240	58.0241	0.369876	0.239054	1.54724	0.121804	0.99994	L4/5 IT Glut	up
Tnfrsf11a	207.316	0.369796	0.176737	2.09235	0.0364068	0.99994	L4/5 IT Glut	up
Wfdc18	0.757912	0.369774	2.00896	0.184063	0.853964	0.99994	L4/5 IT Glut	up
Cdc34	12.17	0.369664	0.494053	0.748227	0.454323	0.99994	L4/5 IT Glut	up
Tgfbr3l	3.62819	0.369118	0.869299	0.424616	0.671117	0.99994	L4/5 IT Glut	up
Phf21b	275.681	0.368673	0.348297	1.0585	0.289827	0.99994	L4/5 IT Glut	up
Coro2a	188.433	0.368545	0.142764	2.58149	0.00983757	0.99994	L4/5 IT Glut	up
Grb7	2.65916	0.368321	1.01223	0.363872	0.715954	0.99994	L4/5 IT Glut	up
3110009E18Rik	17.7325	0.368214	0.389995	0.94415	0.345093	0.99994	L4/5 IT Glut	up
Col2a1	0.499935	0.368214	2.32134	0.158621	0.873967	0.99994	L4/5 IT Glut	up
Tpm4	30.1709	0.368098	0.316309	1.16373	0.244534	0.99994	L4/5 IT Glut	up
Dph7	94.2433	0.367985	0.180748	2.03589	0.041761	0.99994	L4/5 IT Glut	up
Plcd1	26.0172	0.367624	0.343308	1.07083	0.284247	0.99994	L4/5 IT Glut	up
Cdh13	284.551	0.367539	0.159731	2.30099	0.0213921	0.99994	L4/5 IT Glut	up
Nrp2	51.9317	0.366923	0.253182	1.44924	0.14727	0.99994	L4/5 IT Glut	up
Ascl1	9.12729	0.366644	0.533017	0.687866	0.491537	0.99994	L4/5 IT Glut	up
Mal	18.1182	0.366077	0.412414	0.887645	0.374732	0.99994	L4/5 IT Glut	up
Surf2	27.6911	0.366066	0.340677	1.07453	0.282587	0.99994	L4/5 IT Glut	up
E2f7	1.88216	0.365988	1.34214	0.27269	0.785092	0.99994	L4/5 IT Glut	up
Ccdc81	6.89155	0.365877	0.622365	0.587882	0.556611	0.99994	L4/5 IT Glut	up
Dand5	52.7721	0.365774	0.229796	1.59173	0.111445	0.99994	L4/5 IT Glut	up
Lsm11	58.3121	0.365422	0.229398	1.59296	0.11117	0.99994	L4/5 IT Glut	up
Col8a2	2.45394	0.365069	1.03009	0.354406	0.723035	0.99994	L4/5 IT Glut	up
Scube1	1061.35	0.364961	0.115687	3.15474	0.00160643	0.99994	L4/5 IT Glut	up
Evpl	8.00219	0.364596	0.578138	0.630639	0.528277	0.99994	L4/5 IT Glut	up
Cyp19a1	0.596665	0.364561	2.31219	0.157669	0.874717	0.99994	L4/5 IT Glut	up
4930430A15Rik	0.883318	0.364316	1.76827	0.20603	0.836767	0.99994	L4/5 IT Glut	up
B3gnt4	0.599396	0.363736	2.14968	0.169205	0.865636	0.99994	L4/5 IT Glut	up
Ctsk	9.00122	0.363711	0.546018	0.666115	0.505338	0.99994	L4/5 IT Glut	up
Tomm6	38.9182	0.362915	0.299302	1.21254	0.225307	0.99994	L4/5 IT Glut	up
Slc35e3	19.4521	0.36286	0.388999	0.932806	0.35092	0.99994	L4/5 IT Glut	up
Morc1	2.24446	0.362815	1.205	0.301091	0.763345	0.99994	L4/5 IT Glut	up
Lrfn2	689.782	0.362696	0.130004	2.78988	0.00527278	0.99994	L4/5 IT Glut	up
Kbtbd12	2.4717	0.362522	1.07233	0.33807	0.735311	0.99994	L4/5 IT Glut	up
Eno4	15.1941	0.362502	0.472061	0.767914	0.442538	0.99994	L4/5 IT Glut	up
Tmem109	56.8153	0.362372	0.22834	1.58699	0.112516	0.99994	L4/5 IT Glut	up
Slc29a1	2.89185	0.362005	1.0503	0.344668	0.730344	0.99994	L4/5 IT Glut	up
Serpinb8	43.5459	0.361856	0.290172	1.24704	0.212382	0.99994	L4/5 IT Glut	up
Xrcc3	3.10578	0.361413	0.885864	0.407977	0.68329	0.99994	L4/5 IT Glut	up
Xkrx	1.57439	0.361263	1.25749	0.287288	0.773891	0.99994	L4/5 IT Glut	up
Atp10a	27.324	0.361127	0.326727	1.10529	0.269036	0.99994	L4/5 IT Glut	up
Etv6	743.768	0.361075	0.106331	3.39577	6.8434980117228e-4	0.714034	L4/5 IT Glut	up
Tcea3	0.701692	0.360609	2.19821	0.164047	0.869694	0.99994	L4/5 IT Glut	up
Tdrd12	2.02591	0.360368	1.16988	0.30804	0.758052	0.99994	L4/5 IT Glut	up
Rprm	8.68156	0.360247	0.628903	0.572817	0.566768	0.99994	L4/5 IT Glut	up
Adam1a	22.7743	0.359386	0.345539	1.04008	0.298305	0.99994	L4/5 IT Glut	up
Zfp119b	5.98024	0.359315	0.65915	0.545118	0.585672	0.99994	L4/5 IT Glut	up
Nek6	40.7459	0.359308	0.272937	1.31645	0.188022	0.99994	L4/5 IT Glut	up
Dr1	41.5937	0.359205	0.271767	1.32174	0.186255	0.99994	L4/5 IT Glut	up
Ssna1	19.8489	0.359182	0.397839	0.902833	0.366615	0.99994	L4/5 IT Glut	up
Dnaic2	1.23017	0.359117	1.60246	0.224104	0.822677	0.99994	L4/5 IT Glut	up
Drd3	2.21571	0.359107	1.14841	0.312698	0.75451	0.99994	L4/5 IT Glut	up
Vmn2r53	1.2523	0.359099	1.4709	0.244136	0.807125	0.99994	L4/5 IT Glut	up
Prr18	9.34608	0.358444	0.582504	0.61535	0.538324	0.99994	L4/5 IT Glut	up
Ttc9b	20.3852	0.357813	0.475346	0.752742	0.451605	0.99994	L4/5 IT Glut	up
Fcgrt	1.84636	0.357518	1.46619	0.243842	0.807353	0.99994	L4/5 IT Glut	up
Sap30	6.73839	0.357392	0.649542	0.550222	0.582167	0.99994	L4/5 IT Glut	up
Rrp36	37.41	0.357348	0.274235	1.30307	0.19255	0.99994	L4/5 IT Glut	up
Ftl1-ps1	11.9558	0.357025	0.522325	0.68353	0.494272	0.99994	L4/5 IT Glut	up
Gm3550	4.11159	0.356997	0.79361	0.449839	0.652826	0.99994	L4/5 IT Glut	up
Tmem107	18.0893	0.356699	0.404594	0.881621	0.377982	0.99994	L4/5 IT Glut	up
Bcam	1.36845	0.356491	1.42444	0.250267	0.802381	0.99994	L4/5 IT Glut	up
Ccdc190	1.63182	0.356453	1.54934	0.230068	0.818039	0.99994	L4/5 IT Glut	up
Acta1	16.1083	0.356243	0.468322	0.760679	0.446849	0.99994	L4/5 IT Glut	up
Fam78a	9.77703	0.356015	0.51747	0.68799	0.491459	0.99994	L4/5 IT Glut	up
Tgfb1i1	37.1134	0.355852	0.284924	1.24894	0.211688	0.99994	L4/5 IT Glut	up
Thrb	3416.35	0.355758	0.112111	3.17326	0.00150737	0.99994	L4/5 IT Glut	up
Ttll3	48.4215	0.355658	0.246282	1.44411	0.148708	0.99994	L4/5 IT Glut	up
Diras2	147.402	0.355531	0.207784	1.71106	0.0870701	0.99994	L4/5 IT Glut	up
Dbndd1	17.4509	0.354925	0.398469	0.890722	0.373078	0.99994	L4/5 IT Glut	up
Cisd3	20.4399	0.354803	0.381602	0.929774	0.352488	0.99994	L4/5 IT Glut	up
Nlrc4	5.14005	0.354792	0.723135	0.49063	0.623688	0.99994	L4/5 IT Glut	up
Myh15	1.27267	0.354442	1.4867	0.238409	0.811564	0.99994	L4/5 IT Glut	up
Pnp	7.30704	0.354313	0.596671	0.593816	0.552635	0.99994	L4/5 IT Glut	up
Egfl6	17.2336	0.354181	0.475023	0.74560761034604806	0.455904	0.99994	L4/5 IT Glut	up
Saal1	27.2511	0.35369	0.320807	1.1025	0.270243	0.99994	L4/5 IT Glut	up
Slc52a2	11.3994	0.353599	0.506064	0.698725	0.484724	0.99994	L4/5 IT Glut	up
Grm4	150.77	0.353505	0.160096	2.20809	0.0272383	0.99994	L4/5 IT Glut	up
Pdzph1	1.59497	0.353375	1.53384	0.230385	0.817792	0.99994	L4/5 IT Glut	up
Tmem86b	35.7696	0.353152	0.281111	1.25627	0.209017	0.99994	L4/5 IT Glut	up
Rpp25l	8.49856	0.353116	0.580197	0.608613	0.542781	0.99994	L4/5 IT Glut	up
Cdkn2c	0.981499	0.353078	1.5973	0.221047	0.825056	0.99994	L4/5 IT Glut	up
Aebp1	0.859963	0.353034	1.88393	0.187393	0.851353	0.99994	L4/5 IT Glut	up
Mt1	39.9952	0.352524	0.364796	0.966359	0.333865	0.99994	L4/5 IT Glut	up
9130409I23Rik	0.7157	0.352452	1.81701	0.193974	0.846197	0.99994	L4/5 IT Glut	up
Slc12a3	1.21949	0.352412	1.50828	0.233652	0.815255	0.99994	L4/5 IT Glut	up
Mrps26	53.9126	0.352285	0.260688	1.35136	0.176579	0.99994	L4/5 IT Glut	up
Midn	90.6519	0.352136	0.191166	1.84204	0.0654692	0.99994	L4/5 IT Glut	up
Txnrd3	5.47575	0.351838	0.707862	0.497043	0.619159	0.99994	L4/5 IT Glut	up
Ndufa3	9.72262	0.351417	0.76118	0.461674	0.644315	0.99994	L4/5 IT Glut	up
Trim36	5.00561	0.35126	0.721847	0.486613	0.626533	0.99994	L4/5 IT Glut	up
Ccdc36	3.06719	0.351259	0.995886	0.35271	0.724306	0.99994	L4/5 IT Glut	up
Zbtb40	94.0006	0.351074	0.180192	1.94833	0.0513751	0.99994	L4/5 IT Glut	up
Slc41a3	5.48317	0.350062	0.710876	0.492437	0.62241	0.99994	L4/5 IT Glut	up
Cc2d2b	4.3063	0.349521	0.792935	0.440794	0.659362	0.99994	L4/5 IT Glut	up
Flcn	45.5842	0.349149	0.252704	1.38165	0.167078	0.99994	L4/5 IT Glut	up
Zfp964	13.1351	0.348995	0.446276	0.782016	0.434205	0.99994	L4/5 IT Glut	up
Sema3f	50.0928	0.347873	0.260561	1.33509	0.181846	0.99994	L4/5 IT Glut	up
Cnn2	0.846142	0.347744	1.87382	0.18558	0.852774	0.99994	L4/5 IT Glut	up
Oxnad1	28.0338	0.347652	0.31925	1.08897	0.276169	0.99994	L4/5 IT Glut	up
A430005L14Rik	25.0509	0.347176	0.363479	0.95514742544101106	0.339503	0.99994	L4/5 IT Glut	up
Vstm4	4.46457	0.347109	0.789201	0.439824	0.660065	0.99994	L4/5 IT Glut	up
Slc6a11	39.355	0.347018	0.265534	1.30687	0.191258	0.99994	L4/5 IT Glut	up
1700020D05Rik	6.6506897446216096	0.346429	0.622041	0.556923	0.57758	0.99994	L4/5 IT Glut	up
Spata6	23.8871	0.346371	0.341007	1.01573	0.309759	0.99994	L4/5 IT Glut	up
Mgam	0.70769	0.34637	2.0408	0.169723	0.865228	0.99994	L4/5 IT Glut	up
Prkcq	2.26893	0.34634	1.36862	0.253058	0.800223	0.99994	L4/5 IT Glut	up
Wee1	61.678	0.34629	0.232364	1.49029	0.136148	0.99994	L4/5 IT Glut	up
Tmem205	32.8573	0.345717	0.30295	1.14117	0.253799	0.99994	L4/5 IT Glut	up
Ripply3	0.618678	0.345586	2.33383	0.148077	0.882282	0.99994	L4/5 IT Glut	up
Irf8	7.4786	0.345168	0.6125	0.563539	0.573068	0.99994	L4/5 IT Glut	up
Cep41	13.126	0.345146	0.446535	0.772942	0.439557	0.99994	L4/5 IT Glut	up
Chil1	3.59439	0.344671	0.908832	0.379246	0.704506	0.99994	L4/5 IT Glut	up
Rilpl1	266.444	0.344297	0.15742	2.18713	0.0287329	0.99994	L4/5 IT Glut	up
Galm	2.27575	0.34411	1.10735	0.310751	0.75599	0.99994	L4/5 IT Glut	up
Acvr1c	167.836	0.34398	0.150871	2.27997	0.0226096	0.99994	L4/5 IT Glut	up
Zbtb1	79.6803	0.343974	0.196363	1.75173	0.0798202	0.99994	L4/5 IT Glut	up
Mrps12	28.6617	0.343896	0.334825	1.02709	0.304378	0.99994	L4/5 IT Glut	up
Ankrd23	11.8105	0.34388	0.484664	0.709523	0.478	0.99994	L4/5 IT Glut	up
Pcdhgb5	13.1263	0.343656	0.441152	0.778997	0.435982	0.99994	L4/5 IT Glut	up
Lrrc1	8.14668	0.343585	0.559524	0.614066	0.539172	0.99994	L4/5 IT Glut	up
Mettl18	4.76336	0.343549	0.779132	0.440938	0.659258	0.99994	L4/5 IT Glut	up
Ndufaf3	14.1319	0.34314	0.461729	0.743163	0.457383	0.99994	L4/5 IT Glut	up
Wdr46	17.7189	0.342851	0.388279	0.883002	0.377235	0.99994	L4/5 IT Glut	up
Ankrd13b	174.529	0.342831	0.147769	2.32005	0.0203383	0.99994	L4/5 IT Glut	up
Bahd1	40.9593	0.34255	0.263155	1.3017	0.193018	0.99994	L4/5 IT Glut	up
P2rx6	10.3811	0.342216	0.504705	0.678052	0.497739	0.99994	L4/5 IT Glut	up
Trnp1	69.1872	0.341989	0.222708	1.53559	0.124638	0.99994	L4/5 IT Glut	up
Vps28	22.5133	0.341797	0.387417	0.882246	0.377644	0.99994	L4/5 IT Glut	up
Mycbpap	23.5222	0.341785	0.353841	0.965929	0.33408	0.99994	L4/5 IT Glut	up
Plxnb2	33.451	0.341714	0.319944	1.06804	0.285501	0.99994	L4/5 IT Glut	up
Rab3c	649.683	0.341703	0.150603	2.2689	0.0232745	0.99994	L4/5 IT Glut	up
Znrd1as	3.70056	0.34117	0.826467	0.412805	0.67975	0.99994	L4/5 IT Glut	up
Klhl6	0.485478	0.341149	2.53708	0.134465	0.893035	0.99994	L4/5 IT Glut	up
Acacb	1.70739	0.341047	1.29535	0.263285	0.792331	0.99994	L4/5 IT Glut	up
Tefm	8.21454	0.340832	0.576243	0.591472	0.554204	0.99994	L4/5 IT Glut	up
Pyroxd2	0.571906	0.340679	2.52429	0.134961	0.892643	0.99994	L4/5 IT Glut	up
Amotl1	9.38744	0.34054	0.546477	0.623155	0.533183	0.99994	L4/5 IT Glut	up
Rarres1	2.66042	0.340334	1.03852	0.32771	0.743131	0.99994	L4/5 IT Glut	up
Mtnr1b	0.543702	0.340191	2.40567	0.141412	0.887545	0.99994	L4/5 IT Glut	up
Rps15a	85.7638	0.340119	0.227692	1.49377	0.135236	0.99994	L4/5 IT Glut	up
Nhp2	5.65239	0.340058	0.798657	0.425787	0.670263	0.99994	L4/5 IT Glut	up
Tex43	3.40782	0.339852	0.903448	0.376172	0.706789	0.99994	L4/5 IT Glut	up
Mrpl18	27.5552	0.339845	0.329158	1.03247	0.301854	0.99994	L4/5 IT Glut	up
Grem2	53.2482	0.339818	0.253066	1.3428	0.179336	0.99994	L4/5 IT Glut	up
Inf2	139.05	0.339386	0.189424	1.79167	0.0731852	0.99994	L4/5 IT Glut	up
Nmnat3	7.9513	0.339318	0.571293	0.593946	0.552548	0.99994	L4/5 IT Glut	up
Rnf113a2	4.88963	0.339157	0.829316	0.40896	0.682569	0.99994	L4/5 IT Glut	up
Rimbp2	1772.96	0.339085	0.094623	3.58354	3.389743373229e-4	0.557778	L4/5 IT Glut	up
S100b	63.1841	0.338908	0.228788	1.48132	0.138522	0.99994	L4/5 IT Glut	up
Ccdc141	15.5101	0.33885	0.416645	0.813282	0.416056	0.99994	L4/5 IT Glut	up
Rubcnl	12.55	0.338785	0.515557	0.657123	0.511102	0.99994	L4/5 IT Glut	up
Gpr83	77.8381	0.338542	0.226196	1.49668	0.134477	0.99994	L4/5 IT Glut	up
Atp5e	30.5485	0.338492	0.392979	0.861347	0.389047	0.99994	L4/5 IT Glut	up
Gpr68	62.9265	0.338422	0.226269	1.49566	0.134742	0.99994	L4/5 IT Glut	up
Mbp	221.382	0.338163	0.188557	1.79343	0.0729043	0.99994	L4/5 IT Glut	up
Arhgap11a	2.09596	0.338007	1.23849	0.272919	0.784916	0.99994	L4/5 IT Glut	up
Pter	5.18161	0.337785	0.76046	0.444185	0.656909	0.99994	L4/5 IT Glut	up
Itgb7	1.00716	0.337747	1.71088	0.197412	0.843505	0.99994	L4/5 IT Glut	up
Rfx4	8.01044	0.337539	0.622732	0.542029	0.587798	0.99994	L4/5 IT Glut	up
Slpi	1.76298	0.337481	1.26305	0.267196	0.789318	0.99994	L4/5 IT Glut	up
Flywch2	14.8103	0.337418	0.430473	0.783831	0.433139	0.99994	L4/5 IT Glut	up
Ehd3	53.7426	0.336872	0.233332	1.44375	0.14881	0.99994	L4/5 IT Glut	up
Snn	49.6064	0.336564	0.282394	1.19183	0.23333	0.99994	L4/5 IT Glut	up
Grip2	18.7047	0.336319	0.395957	0.849383	0.395668	0.99994	L4/5 IT Glut	up
Chmp2a	37.0368	0.336136	0.301505	1.11486	0.26491	0.99994	L4/5 IT Glut	up
Nudt16l1	24.4675	0.335941	0.342359	0.981253	0.326468	0.99994	L4/5 IT Glut	up
Palld	4.70433	0.335809	0.788954	0.425638	0.670372	0.99994	L4/5 IT Glut	up
Dhrs4	4.28135	0.335804	0.801383	0.419031	0.675194	0.99994	L4/5 IT Glut	up
Xylt2	43.5159	0.335758	0.261465	1.28414	0.199092	0.99994	L4/5 IT Glut	up
Grik1	1736.28	0.335644	0.126032	2.66317	0.00774091	0.99994	L4/5 IT Glut	up
AY074887	1.17962	0.33509	1.55728	0.215177	0.82963	0.99994	L4/5 IT Glut	up
Mrpl27	40.1368	0.335046	0.274899	1.21879	0.222922	0.99994	L4/5 IT Glut	up
Tsnaxip1	6.55657	0.334691	0.621942	0.538139	0.590481	0.99994	L4/5 IT Glut	up
Slc31a1	56.8221	0.334337	0.227312	1.47082	0.141338	0.99994	L4/5 IT Glut	up
Fbxw9	48.2118	0.334148	0.244763	1.36519	0.172192	0.99994	L4/5 IT Glut	up
Zfp146	31.072	0.33404	0.300976	1.10986	0.267061	0.99994	L4/5 IT Glut	up
Tchh	10.5262	0.333961	0.557984	0.598514	0.549497	0.99994	L4/5 IT Glut	up
Fam13c	407.499	0.333784	0.148145	2.25309	0.0242538	0.99994	L4/5 IT Glut	up
Rce1	33.401	0.333551	0.299432	1.11394	0.265303	0.99994	L4/5 IT Glut	up
Tuba8	10.6073	0.333092	0.556517	0.59853	0.549487	0.99994	L4/5 IT Glut	up
Arhgap45	1.72458	0.332888	1.42086	0.234287	0.814762	0.99994	L4/5 IT Glut	up
Pip5k1b	249.357	0.332874	0.129753	2.56545	0.0103042	0.99994	L4/5 IT Glut	up
1700102P08Rik	12.2312	0.332604	0.468521	0.709902	0.477765	0.99994	L4/5 IT Glut	up
Rbm15b	18.4013	0.332555	0.406196	0.818707	0.412954	0.99994	L4/5 IT Glut	up
Spry4	7.30535	0.332509	0.617691	0.53831	0.590363	0.99994	L4/5 IT Glut	up
Adgre1	2.46657	0.332479	1.26227	0.263397	0.792244	0.99994	L4/5 IT Glut	up
Gli2	1.81199	0.3324	1.56182	0.212829	0.83146	0.99994	L4/5 IT Glut	up
[truncated: 309,473+ more rows]

## Sheet: Table S7
gene	baseMean	log2FoldChange	lfcSE	stat	pvalue	padj	Cell_Type_3	DE
Cdca3	1.5667	3.00114	1.482	2.02506	0.0428608	0.999963	Glutamatergic	up
Cd36	3.0501	2.78885	1.11124	2.50967	0.0120845	0.999963	Glutamatergic	up
Trim6	0.608498	2.74694	2.17403	1.26352	0.206401	0.999963	Glutamatergic	up
Epn3	1.16057	2.72134	1.65045	1.64885	0.0991782	0.999963	Glutamatergic	up
Chrna9	1.17155	2.43089	1.77936	1.36616	0.171889	0.999963	Glutamatergic	up
Slfn8	2.26858	2.39154	1.29618	1.84507	0.0650273	0.999963	Glutamatergic	up
Unc5cl	2.68142	2.36859	1.28818	1.83871	0.0659575	0.999963	Glutamatergic	up
Ip6k3	0.947567	2.35896	1.75462	1.34443	0.17881	0.999963	Glutamatergic	up
BC035044	1.74057	2.28958	1.36439	1.6781	0.093328	0.999963	Glutamatergic	up
Fam180a	1.44434	2.25253	1.50871	1.49302	0.135433	0.999963	Glutamatergic	up
Kctd11	1.12653	2.18691	1.70654	1.28149	0.200023	0.999963	Glutamatergic	up
Syngr4	1.61163	2.10079	1.49611	1.40417	0.160268	0.999963	Glutamatergic	up
Fcrl5	1.46024	2.07569	1.47636	1.40595	0.15974	0.999963	Glutamatergic	up
Thbs1	1.85972	2.05905	1.32848	1.54993	0.121158	0.999963	Glutamatergic	up
Eif2s3y	892.168	1.99365	1.34813	1.47882	0.139187	0.999963	Glutamatergic	up
Scgn	0.457536	1.97256	2.94152	0.67059	0.502482	0.999963	Glutamatergic	up
Icosl	0.970769	1.92708	1.96726	0.979578	0.327294	0.999963	Glutamatergic	up
Capg	0.870759	1.88464	1.91965	0.981762	0.326217	0.999963	Glutamatergic	up
Grin2c	0.639573	1.86867	2.86101	0.653152	0.513659	0.999963	Glutamatergic	up
Uty	1255.05	1.86731	1.30922	1.42628	0.153788	0.999963	Glutamatergic	up
Vmn2r26	1.86796	1.84846	1.33957	1.37989	0.167621	0.999963	Glutamatergic	up
6030468B19Rik	0.432724	1.84361	3.0025	0.614026	0.539198	0.999963	Glutamatergic	up
Slamf9	0.782432	1.81772	1.99569	0.910822	0.362389	0.999963	Glutamatergic	up
Sctr	1.10898	1.75509	1.76678	0.993381	0.320524	0.999963	Glutamatergic	up
Clic6	2.60654	1.74756	1.1449	1.52638	0.126914	0.999963	Glutamatergic	up
Agbl2	4.69539	1.72043	0.867059	1.98421	0.0472321	0.999963	Glutamatergic	up
Kcne4	1.55892	1.71788	1.41437	1.21459	0.224522	0.999963	Glutamatergic	up
Hpx	1.94433	1.71646	1.2155	1.41215	0.157907	0.999963	Glutamatergic	up
Kdm5d	390.123	1.71509	1.24726	1.37509	0.169105	0.999963	Glutamatergic	up
Frk	1.53763	1.70781	1.5252	1.11973	0.262829	0.999963	Glutamatergic	up
Dsg3	0.85478082912642706	1.70471	2.12051	0.803914	0.421447	0.999963	Glutamatergic	up
Fcgbp	0.689006	1.70412	2.26436	0.75258348501819206	0.4517	0.999963	Glutamatergic	up
En2	1.30277	1.6694	1.8052	0.924773	0.355084	0.999963	Glutamatergic	up
9130213A22Rik	1.29656	1.64214	1.81574	0.904391	0.365788	0.999963	Glutamatergic	up
Lyz2	2.29709	1.63564	1.24953	1.309	0.190535	0.999963	Glutamatergic	up
Hmcn2	7.09883	1.62472	0.655027	2.48039	0.0131238	0.999963	Glutamatergic	up
Gm7271	5.24464	1.62383	0.809452	2.00609	0.0448467	0.999963	Glutamatergic	up
Cryba2	0.934417	1.6092	1.93632	0.831057	0.405941	0.999963	Glutamatergic	up
Arhgap28	7.05448	1.60902	0.703522	2.28709	0.0221905	0.999963	Glutamatergic	up
Ifi209	0.300574	1.60784	3.13515	0.512842	0.608062	0.999963	Glutamatergic	up
Catsper4	1.01385	1.60251	1.734	0.924169	0.355399	0.999963	Glutamatergic	up
Ugt1a7c	0.588292	1.59944	2.23676	0.715068	0.474567	0.999963	Glutamatergic	up
Tshb	0.59455	1.59733	2.40465	0.664268	0.506519	0.999963	Glutamatergic	up
Rspo4	0.469269	1.59673	2.60945	0.611901	0.540603	0.999963	Glutamatergic	up
Trim54	1.86292	1.57571	1.40308	1.12304	0.261421	0.999963	Glutamatergic	up
Mrvi1	2.7214	1.57304	1.09249	1.43987	0.149903	0.999963	Glutamatergic	up
Pkn3	0.576607	1.56488	2.41024	0.649262	0.516169	0.999963	Glutamatergic	up
Snai2	0.914189	1.56357	1.7404	0.898396	0.368974	0.999963	Glutamatergic	up
Terb2	1.03196	1.55585	2.02024	0.770128	0.441224	0.999963	Glutamatergic	up
Gpr65	0.483694	1.54904	2.57905	0.600622	0.548092	0.999963	Glutamatergic	up
Ddx3y	354.575	1.53702	1.19272	1.28867	0.197514	0.999963	Glutamatergic	up
Fgfr4	1.04838	1.53429	1.71795	0.893095	0.371806	0.999963	Glutamatergic	up
Kcna5	0.632767	1.51372	2.1556	0.702224	0.482539	0.999963	Glutamatergic	up
Gm3591	0.331117	1.51164	3.13557	0.482094	0.629739	0.999963	Glutamatergic	up
Olfr889	4.46234	1.50558	0.82953	1.81498	0.0695273	0.999963	Glutamatergic	up
Dlx4	1.39225	1.50048	1.53808	0.975559	0.329283	0.999963	Glutamatergic	up
Fcrls	4.00148	1.48706	0.916327	1.62285	0.104622	0.999963	Glutamatergic	up
Vsig4	0.685418	1.48056	2.29995	0.643734	0.519748	0.999963	Glutamatergic	up
Ano7	0.477083	1.47272	3.13015	0.470493	0.638003	0.999963	Glutamatergic	up
Il18r1	2.19427	1.46704	3.06656	0.478399	0.632366	0.999963	Glutamatergic	up
Ccl12	0.903338	1.46471	1.91502	0.764852	0.44436	0.999963	Glutamatergic	up
Ppp3r2	3.22848	1.46255	0.971113	1.50605	0.132054	0.999963	Glutamatergic	up
Gm3752	1.31787	1.45294	1.65809	0.876278	0.380879	0.999963	Glutamatergic	up
Gbp5	2.79336	1.44907	0.994507	1.45708	0.145095	0.999963	Glutamatergic	up
Aire	0.541543	1.44856	2.47389	0.585541	0.558184	0.999963	Glutamatergic	up
Fam240b	0.70093	1.43227	1.93156	0.741507	0.458386	0.999963	Glutamatergic	up
Kif18b	0.522323	1.43182	2.50384	0.57185	0.567424	0.999963	Glutamatergic	up
Ccr10	0.933858	1.42928	2.08342	0.686026	0.492697	0.999963	Glutamatergic	up
Oasl2	2.15545	1.42581	1.251	1.13973	0.254398	0.999963	Glutamatergic	up
Fscn3	2.58625	1.41862	1.12592	1.25996	0.207682	0.999963	Glutamatergic	up
Rbpjl	1.01203	1.41791	1.55113	0.914115	0.360656	0.999963	Glutamatergic	up
Ocstamp	0.751517	1.40932	2.45066	0.575076	0.56524	0.999963	Glutamatergic	up
H2-DMb2	2.28916	1.40393	1.11859	1.25509	0.209448	0.999963	Glutamatergic	up
Zic4	1.06253	1.40359	1.53223	0.916043	0.359644	0.999963	Glutamatergic	up
Gm36028	1.20458	1.40202	1.76013	0.796542	0.425717	0.999963	Glutamatergic	up
Tnfsf11	0.445465	1.39607	2.68585	0.519787	0.603212	0.999963	Glutamatergic	up
P2ry10b	0.86054	1.39368	1.82101	0.765332	0.444074	0.999963	Glutamatergic	up
Lrrc26	1.11317	1.3873	2.07296	0.669236	0.503345	0.999963	Glutamatergic	up
Rab7b	1.12399	1.38524	1.72296	0.803985	0.421406	0.999963	Glutamatergic	up
Tnfrsf17	0.714066	1.38197	2.24157	0.616522	0.53755	0.999963	Glutamatergic	up
Il21r	1.14022	1.3778	1.63255	0.843955	0.398695	0.999963	Glutamatergic	up
Gm8206	0.922207	1.37708	1.92677	0.714711	0.474788	0.999963	Glutamatergic	up
3425401B19Rik	0.249872	1.37666	3.14062	0.438339	0.66114	0.999963	Glutamatergic	up
Glt6d1	0.959438	1.36883	2.18403	0.626744	0.530827	0.999963	Glutamatergic	up
Trim16	3.89877	1.36079	0.957841	1.42068	0.155409	0.999963	Glutamatergic	up
Lenep	0.343393	1.35513	3.11988	0.434354	0.664032	0.999963	Glutamatergic	up
Ppp1r17	0.294436	1.35156	3.13699	0.430848	0.666579	0.999963	Glutamatergic	up
Krt73	0.294436	1.35156	3.13699	0.430848	0.666579	0.999963	Glutamatergic	up
Esco2	2.55644	1.34845	1.08547	1.24228	0.214134	0.999963	Glutamatergic	up
Hhex	1.18723	1.34506	1.80563	0.744924	0.456318	0.999963	Glutamatergic	up
Plekhg6	0.40892	1.34473	3.13532	0.428897	0.667998	0.999963	Glutamatergic	up
Gm13212	0.675586	1.34163	2.2591	0.59388	0.552592	0.999963	Glutamatergic	up
Psmb11	1.79549	1.34027	1.19273	1.1237	0.261139	0.999963	Glutamatergic	up
Car1	0.688578	1.3399	2.2508	0.5953	0.551643	0.999963	Glutamatergic	up
Dpep2	0.422001	1.33558	3.13622	0.425858	0.670212	0.999963	Glutamatergic	up
Adad2	4.80078	1.32409	0.837368	1.58125	0.113821	0.999963	Glutamatergic	up
3110082J24Rik	1.45254	1.3215	1.39657	0.946242	0.344025	0.999963	Glutamatergic	up
Trim5	2.76055	1.31655	1.22228	1.07712	0.281425	0.999963	Glutamatergic	up
Rpl10-ps3	3.36812	1.31282	0.939891	1.39678	0.162479	0.999963	Glutamatergic	up
Knl1	8.76326	1.30339	0.603689	2.15903	0.0308475	0.999963	Glutamatergic	up
Lhx4	2.001	1.30207	1.14178	1.14038	0.254128	0.999963	Glutamatergic	up
Ptafr	1.44207	1.30174	1.509	0.862656	0.388327	0.999963	Glutamatergic	up
Lime1	2.67306	1.30116	1.0177	1.27854	0.20106	0.999963	Glutamatergic	up
Ltb4r1	2.21081	1.29856	1.1262	1.15305	0.248889	0.999963	Glutamatergic	up
Sp8	1.6468	1.2977	1.30435	0.994906	0.319782	0.999963	Glutamatergic	up
Itgal	2.41792	1.29493	1.12996	1.146	0.251796	0.999963	Glutamatergic	up
Slamf6	1.34537	1.29428	1.51178	0.856133	0.391924	0.999963	Glutamatergic	up
Stk31	11.349	1.28872	0.493247	2.61272	0.00898246	0.999963	Glutamatergic	up
Cytl1	0.627382	1.28243	2.35113	0.545452	0.585442	0.999963	Glutamatergic	up
Vwde	1.44853	1.27971	1.59705	0.801296	0.42296	0.999963	Glutamatergic	up
Dyrk4	0.387293	1.27942	2.84283	0.45005	0.652674	0.999963	Glutamatergic	up
Cd109	6.30285	1.2786	0.70328	1.81805	0.0690569	0.999963	Glutamatergic	up
Ttc29	1.45448	1.27744	1.55049	0.823893	0.41	0.999963	Glutamatergic	up
2610528A11Rik	1.84496	1.24484	1.25627	0.990907	0.321731	0.999963	Glutamatergic	up
Sod3	0.869151	1.24386	1.7903	0.694775	0.487196	0.999963	Glutamatergic	up
Pla2r1	1.98819	1.24235	1.42069	0.874471	0.381862	0.999963	Glutamatergic	up
Dsc3	1.08054	1.23784	1.79937	0.687929	0.491497	0.999963	Glutamatergic	up
Atp12a	3.96417	1.23438	0.847875	1.45585	0.145434	0.999963	Glutamatergic	up
B430218F22Rik	3.8678	1.23127	0.862352	1.42781	0.153347	0.999963	Glutamatergic	up
Cldn1	2.33645	1.22624	1.12967	1.08549	0.277706	0.999963	Glutamatergic	up
Scarf2	3.60941	1.22265	0.868839	1.40722	0.159362	0.999963	Glutamatergic	up
Ppp1r3a	3.86245	1.22065	0.847581	1.44016	0.149824	0.999963	Glutamatergic	up
Kdr	5.1212	1.22047	0.908493	1.34341	0.179141	0.999963	Glutamatergic	up
Cdh26	0.681017	1.21971	2.34219	0.520756	0.602537	0.999963	Glutamatergic	up
Foxr1	0.637489	1.21161	2.56798	0.471815	0.637059	0.999963	Glutamatergic	up
Lrrc46	3.21776	1.20683	0.955464	1.26309	0.206558	0.999963	Glutamatergic	up
Foxj1	3.33324	1.19328	0.967606	1.23323	0.217491	0.999963	Glutamatergic	up
Scin	1.50054	1.19288	1.45656	0.818969	0.412804	0.999963	Glutamatergic	up
Mettl11b	1.45929	1.19059	1.35946	0.875779	0.38115	0.999963	Glutamatergic	up
Hist1h1d	0.672344	1.18125	2.07258	0.569942	0.568717	0.999963	Glutamatergic	up
Sost	0.627577	1.17375	2.12174	0.5532	0.580126	0.999963	Glutamatergic	up
Crispld2	3.0072	1.17352	1.1757	0.998147	0.318208	0.999963	Glutamatergic	up
Hsd17b1	2.0517	1.17022	1.15861	1.01002	0.312486	0.999963	Glutamatergic	up
Tmem125	2.95859	1.1673	0.969102	1.20452	0.22839	0.999963	Glutamatergic	up
Serpinb1b	1.76597	1.16634	1.24665	0.935577	0.349491	0.999963	Glutamatergic	up
Stbd1	1.82899	1.16253	1.28924	0.901719	0.367206	0.999963	Glutamatergic	up
Ikzf3	2.1028	1.16248	1.32816	0.875251	0.381437	0.999963	Glutamatergic	up
Itpripl2	3.33086	1.16061	0.919107	1.26276	0.206677	0.999963	Glutamatergic	up
Mgarp	2.50705	1.15732	1.04499	1.1075	0.26808	0.999963	Glutamatergic	up
Pspn	0.505458	1.15345	2.55164	0.452042	0.651239	0.999963	Glutamatergic	up
Mageb3	1.58851	1.15341	1.47861	0.780068	0.435351	0.999963	Glutamatergic	up
Ntsr2	6.08248	1.15231	0.889404	1.2956	0.195115	0.999963	Glutamatergic	up
Cdc42ep4	5.66119	1.14868	0.758535	1.51434	0.129939	0.999963	Glutamatergic	up
Clec4n	0.219329	1.14322	3.15031	0.362892	0.716685	0.999963	Glutamatergic	up
Rrm2	2.64583	1.14295	1.11368	1.02628	0.30476	0.999963	Glutamatergic	up
Hsd17b3	0.91155	1.13955	1.6541	0.688924	0.490871	0.999963	Glutamatergic	up
Gata1	1.50446	1.13765	1.35873	0.837287	0.402431	0.999963	Glutamatergic	up
Vsir	2.69308	1.13649	1.16315	0.97708	0.32853	0.999963	Glutamatergic	up
Gm4788	2.40654	1.13522	1.25233	0.906481	0.364681	0.999963	Glutamatergic	up
4933402J07Rik	0.213395	1.12997	3.14868	0.358871	0.719691	0.999963	Glutamatergic	up
Gm10521	0.213395	1.12997	3.14868	0.358871	0.719691	0.999963	Glutamatergic	up
C2cd4d	1.18228	1.12891	1.55463	0.726156	0.467743	0.999963	Glutamatergic	up
Slc6a19	0.162693	1.12814	3.14841	0.35832	0.720104	0.999963	Glutamatergic	up
Vmn1r88	0.444524	1.12649	2.67453	0.42119	0.673616	0.999963	Glutamatergic	up
Apobec2	2.71243	1.12492	0.987093	1.13963	0.254442	0.999963	Glutamatergic	up
Ifi47	0.650114	1.12385	2.60202	0.431916	0.665803	0.999963	Glutamatergic	up
Chst3	5.71364	1.12359	0.664277	1.69145	0.0907504	0.999963	Glutamatergic	up
A530032D15Rik	0.357278	1.1224	2.90446	0.38644	0.699171	0.999963	Glutamatergic	up
Krt28	2.39988	1.12219	1.08553	1.03377	0.301243	0.999963	Glutamatergic	up
Rufy4	0.559412	1.12214	2.70647	0.414613	0.678425	0.999963	Glutamatergic	up
Prokr2	2.85923	1.11951	1.00397	1.11508	0.264816	0.999963	Glutamatergic	up
Olfr552	3.05745	1.11773	1.01932	1.09654	0.272841	0.999963	Glutamatergic	up
Hist2h2aa1	0.382282	1.11682	2.83624	0.393768	0.693752	0.999963	Glutamatergic	up
Nhlh2	0.213191	1.11304	3.14636	0.353754	0.723523	0.999963	Glutamatergic	up
S1pr4	0.213191	1.11304	3.14636	0.353754	0.723523	0.999963	Glutamatergic	up
Pim1	63.2677	1.11249	0.213996	5.19864	2.00752092884614e-7	0.00346117	Glutamatergic	up
Kir3dl2	2.51673	1.10475	1.05315	1.049	0.294177	0.999963	Glutamatergic	up
Syndig1l	6.45099	1.10445	0.674926	1.6364	0.101757	0.999963	Glutamatergic	up
Lpar2	6.12571	1.10372	0.658371	1.67644	0.0936517	0.999963	Glutamatergic	up
Olfr1328	0.276974	1.10328	3.14481	0.350825	0.72572	0.999963	Glutamatergic	up
4930486L24Rik	0.276974	1.10328	3.14481	0.350825	0.72572	0.999963	Glutamatergic	up
BC024139	0.276974	1.10328	3.14481	0.350825	0.72572	0.999963	Glutamatergic	up
Gm9918	0.276974	1.10328	3.14481	0.350825	0.72572	0.999963	Glutamatergic	up
Hist1h2ac	1.46794	1.10287	1.35036	0.816721	0.414088	0.999963	Glutamatergic	up
Dntt	0.880083	1.10214	1.70281	0.64725	0.51747	0.999963	Glutamatergic	up
Dnase1l3	41.3631	1.10158	0.378803	2.90806	0.00363678	0.999963	Glutamatergic	up
Oasl1	0.226272	1.10139	3.14453	0.350256	0.726147	0.999963	Glutamatergic	up
A730009L09Rik	0.226272	1.10139	3.14453	0.350256	0.726147	0.999963	Glutamatergic	up
Hlx	0.495639	1.10137	2.58084	0.42675	0.669561	0.999963	Glutamatergic	up
Hist1h4c	1.4961	1.09744	1.35639	0.809093	0.418462	0.999963	Glutamatergic	up
Itgad	2.68784	1.09743	1.03437	1.06096	0.288706	0.999963	Glutamatergic	up
Shisal2a	1.05461	1.09448	1.67788	0.652301	0.514207	0.999963	Glutamatergic	up
Cldn14	1.11072	1.0922	2.20987	0.494238	0.621138	0.999963	Glutamatergic	up
Gprc5c	2.53259	1.09154	1.03077	1.05896	0.289618	0.999963	Glutamatergic	up
Socs1	8.43592	1.08602	0.605717	1.79295	0.0729807	0.999963	Glutamatergic	up
Gm14597	2.50491	1.08471	1.0821	1.00241	0.316144	0.999963	Glutamatergic	up
Ttll10	0.495436	1.08455	2.57824	0.420653	0.674008	0.999963	Glutamatergic	up
Barhl2	0.495436	1.08455	2.57824	0.420653	0.674008	0.999963	Glutamatergic	up
Flt4	2.89336	1.08328	0.983936	1.10096	0.270913	0.999963	Glutamatergic	up
Adap2	5.22119	1.07755	0.7933	1.35831	0.174366	0.999963	Glutamatergic	up
Fndc7	1.01416	1.07392	1.69876	0.632178	0.527271	0.999963	Glutamatergic	up
Gm9573	6.91765	1.07253	0.693698	1.54611	0.122078	0.999963	Glutamatergic	up
Fn1	46.6211	1.0703	0.807347	1.32569	0.184941	0.999963	Glutamatergic	up
Tbx18	1.38874	1.07002	1.61949	0.660714	0.508796	0.999963	Glutamatergic	up
Depp1	0.964709	1.06774	2.17305	0.491355	0.623176	0.999963	Glutamatergic	up
Tfpi2	1.51955	1.06348	1.82861	0.581578	0.560851	0.999963	Glutamatergic	up
Six2	0.614748	1.06286	2.35496	0.451329	0.651752	0.999963	Glutamatergic	up
Tmem200b	0.715676	1.05731	2.26694	0.466404	0.640926	0.999963	Glutamatergic	up
Lctl	0.747136	1.05604	2.42689	0.435141	0.66346	0.999963	Glutamatergic	up
Styk1	3.89427	1.05392	0.837479	1.25845	0.20823	0.999963	Glutamatergic	up
Slc22a6	1.70785	1.05359	1.30732	0.805912	0.420294	0.999963	Glutamatergic	up
Treh	0.66641	1.05186	2.0989	0.501148	0.616267	0.999963	Glutamatergic	up
Raet1e	13.0908	1.04871	0.483756	2.16784	0.0301705	0.999963	Glutamatergic	up
Slc25a45	1.91491	1.03637	1.23143	0.841601	0.400011	0.999963	Glutamatergic	up
Psapl1	2.94705	1.03414	0.996078	1.03822	0.299169	0.999963	Glutamatergic	up
Dnaaf3	2.53665	1.03354	1.18713	0.870623	0.38396	0.999963	Glutamatergic	up
Amelx	4.23695	1.03097	0.857716	1.20199	0.229366	0.999963	Glutamatergic	up
Gm3411	2.89545	1.0283	0.946806	1.08607	0.277446	0.999963	Glutamatergic	up
Fgfbp1	0.690803	1.02758	2.07489	0.495245	0.620427	0.999963	Glutamatergic	up
Olfr692	0.764092	1.02379	2.36721	0.432488	0.665387	0.999963	Glutamatergic	up
Pgf	6.6583	1.02244	0.645132	1.58486	0.112998	0.999963	Glutamatergic	up
Pcdhac1	5.21258	1.01653	0.753886	1.34839	0.177532	0.999963	Glutamatergic	up
Car8	12.4947	1.01551	0.525949	1.93082	0.0535055	0.999963	Glutamatergic	up
L1td1	0.888657	1.01435	1.88886	0.537016	0.591257	0.999963	Glutamatergic	up
Erich6b	1.85496	1.00266	1.37192	0.730845	0.464874	0.999963	Glutamatergic	up
Duox1	8.19753	1.00211	0.624634	1.60431	0.108645	0.999963	Glutamatergic	up
Lamc3	1.84466	1.00081	1.30198	0.768687	0.442079	0.999963	Glutamatergic	up
Ifi27l2a	1.18011	1.00036	1.50805	0.66335	0.507106	0.999963	Glutamatergic	up
4833427G06Rik	2.64949	0.999602	1.08858	0.918262	0.358482	0.999963	Glutamatergic	up
BC107364	0.818653	0.997482	2.08952	0.477373	0.633096	0.999963	Glutamatergic	up
Clcnkb	0.630133	0.997046	2.56195	0.389174	0.697148	0.999963	Glutamatergic	up
Spem1	2.34466	0.99672	1.08713	0.916834	0.35923	0.999963	Glutamatergic	up
Ccdc102a	0.432983	0.995317	3.03334	0.328126	0.742816	0.999963	Glutamatergic	up
Lama1	5.49881	0.993382	0.717612	1.38429	0.16627	0.999963	Glutamatergic	up
Olfr1431	3.16314	0.990965	0.914888	1.08315	0.27874	0.999963	Glutamatergic	up
Ccdc146	5.3458	0.989855	0.722077	1.37084	0.170423	0.999963	Glutamatergic	up
Slc22a7	3.3008	0.988833	0.890423	1.11052	0.266775	0.999963	Glutamatergic	up
Cd200r3	1.36038	0.98259	1.62719	0.603856	0.545939	0.999963	Glutamatergic	up
Snx20	6.41233	0.98215	0.673594	1.45807	0.14482	0.999963	Glutamatergic	up
Galnt6	3.51576	0.980407	0.878516	1.11598	0.26443	0.999963	Glutamatergic	up
Gfy	3.9175	0.978872	0.904561	1.08215	0.279185	0.999963	Glutamatergic	up
Smim5	2.00821	0.978687	1.25686	0.778678	0.436169	0.999963	Glutamatergic	up
Ccr4	2.04293	0.978111	1.18392	0.826163	0.408712	0.999963	Glutamatergic	up
Cd4	3.92341	0.978059	0.854243	1.14494	0.252233	0.999963	Glutamatergic	up
Gpr3	21.1854	0.976961	0.364175	2.68267	0.00730367	0.999963	Glutamatergic	up
Slc25a48	1.31002	0.972542	1.53736	0.632605	0.526991	0.999963	Glutamatergic	up
Castor1	3.7464	0.971443	0.825946	1.17616	0.239531	0.999963	Glutamatergic	up
Ftcd	3.91467	0.96945	0.855484	1.13322	0.257123	0.999963	Glutamatergic	up
Gp9	0.40245	0.968008	3.07945	0.314344	0.75326	0.999963	Glutamatergic	up
Ttc21a	9.1823	0.964842	0.549711	1.75518	0.0792286	0.999963	Glutamatergic	up
Nod1	2.05925	0.963058	1.28345	0.750365	0.453035	0.999963	Glutamatergic	up
A730049H05Rik	0.769984	0.962112	1.88337	0.510844	0.60946	0.999963	Glutamatergic	up
Jag1	4.47915	0.961951	0.774719	1.24168	0.214356	0.999963	Glutamatergic	up
Garem2	1.16179	0.961834	1.68805	0.569791	0.56882	0.999963	Glutamatergic	up
Smpd5	1.39908	0.961832	1.40612	0.684032	0.493955	0.999963	Glutamatergic	up
Pheta2	1.02012	0.960313	1.61229	0.59562	0.551429	0.999963	Glutamatergic	up
Tm4sf5	1.27019	0.960265	1.52192	0.630956	0.528069	0.999963	Glutamatergic	up
Ccdc87	3.12738	0.958015	1.04933	0.912979	0.361254	0.999963	Glutamatergic	up
Klrd1	0.614504	0.957731	2.6118	0.366694	0.713848	0.999963	Glutamatergic	up
Gm9887	7.84668	0.955597	0.587025	1.62786	0.103554	0.999963	Glutamatergic	up
C1qa	9.00264	0.955592	0.678099	1.40922	0.15877	0.999963	Glutamatergic	up
Cd33	2.21133	0.952014	1.31528	0.723813	0.46918	0.999963	Glutamatergic	up
Chst5	2.1436	0.947504	1.19502	0.79288	0.427848	0.999963	Glutamatergic	up
Crtam	1.04609	0.947386	1.73736	0.545303	0.585545	0.999963	Glutamatergic	up
Tmem252	0.475859	0.946286	2.61761	0.361508	0.71772	0.999963	Glutamatergic	up
Ldoc1	0.7517	0.943365	2.03172	0.464318	0.64242	0.999963	Glutamatergic	up
Kcne3	0.698694	0.937431	2.47915	0.378125	0.705337	0.999963	Glutamatergic	up
Sstr4	7.43626	0.937052	0.656571	1.42719	0.153525	0.999963	Glutamatergic	up
Cd24a	5.31061	0.936528	0.784154	1.19432	0.232354	0.999963	Glutamatergic	up
St8sia2	57.5827	0.933129	0.265676	3.51228	4.4427142473612e-4	0.403141	Glutamatergic	up
Trp53i13	3.7948	0.932525	0.897806	1.03867	0.298958	0.999963	Glutamatergic	up
Ccdc180	0.704246	0.930761	2.49801	0.372601	0.709446	0.999963	Glutamatergic	up
F830016B08Rik	0.700033	0.929503	2.28997	0.405902	0.684815	0.999963	Glutamatergic	up
Fxyd2	8.5627	0.92904	0.565514	1.64282	0.10042	0.999963	Glutamatergic	up
Cps1	0.742935	0.928492	2.10625	0.440828	0.659338	0.999963	Glutamatergic	up
Sgo2b	1.03048	0.926445	1.90187	0.487122	0.626172	0.999963	Glutamatergic	up
Catsperg2	1.31666	0.925351	1.49281	0.61987	0.535343	0.999963	Glutamatergic	up
Gm13420	3.95904	0.922703	0.833978	1.10639	0.268559	0.999963	Glutamatergic	up
A4galt	13.8682	0.922513	0.502753	1.83492	0.0665172	0.999963	Glutamatergic	up
Nfkbie	4.61559	0.917723	0.765785	1.19841	0.230758	0.999963	Glutamatergic	up
Vsig8	3.20093	0.917198	1.04864	0.874654	0.381762	0.999963	Glutamatergic	up
Slc38a5	0.85456	0.915531	1.8317	0.499826	0.617198	0.999963	Glutamatergic	up
Hcn4	10.003	0.913845	0.521979	1.75073	0.0799922	0.999963	Glutamatergic	up
Gimap6	1.47479	0.912286	1.32288	0.68962	0.490433	0.999963	Glutamatergic	up
Mroh2b	0.796464	0.912031	1.79239	0.508836	0.610867	0.999963	Glutamatergic	up
Hcar1	0.729312	0.90995	2.49093	0.365306	0.714883	0.999963	Glutamatergic	up
Wbp2nl	0.324979	0.909937	3.12429	0.291246	0.770863	0.999963	Glutamatergic	up
Tmed6	3.24142	0.908179	0.882738	1.02882	0.303564	0.999963	Glutamatergic	up
Cib4	3.09685	0.906502	0.947738	0.95649	0.338825	0.999963	Glutamatergic	up
Lamb2	1.40787	0.905291	1.71553	0.527703	0.597705	0.999963	Glutamatergic	up
Mc2r	1.60352	0.903237	1.53006	0.590327	0.554972	0.999963	Glutamatergic	up
Cnpy1	0.499901	0.903168	2.87552	0.314088	0.753454	0.999963	Glutamatergic	up
Psca	0.527785	0.899558	3.12366	0.287982	0.77336	0.999963	Glutamatergic	up
Slc39a5	1.99117	0.899406	1.28213	0.701493	0.482995	0.999963	Glutamatergic	up
Mst1	3.8456	0.899326	0.949613	0.947044	0.343616	0.999963	Glutamatergic	up
Gstt3	1.41278	0.897632	1.29166	0.694947	0.487089	0.999963	Glutamatergic	up
Edn1	1.73753	0.897023	1.25404	0.715307	0.47442	0.999963	Glutamatergic	up
Sapcd2	1.11038	0.89676	1.79199	0.500427	0.616774	0.999963	Glutamatergic	up
Galnt5	1.26759	0.896236	1.58452	0.565621	0.571651	0.999963	Glutamatergic	up
Cyp2b13	1.73072	0.895407	1.36728	0.654883	0.512543	0.999963	Glutamatergic	up
Klrb1c	1.51385	0.889752	1.34462	0.661715	0.508154	0.999963	Glutamatergic	up
Tmem26	0.243734	0.888777	3.1315	0.283818	0.77655	0.999963	Glutamatergic	up
Il17c	1.68769	0.8837	1.31461	0.672213	0.501448	0.999963	Glutamatergic	up
Ces2b	0.387617	0.883426	3.10388	0.28462	0.775936	0.999963	Glutamatergic	up
Fam83e	3.14505	0.882839	0.979323	0.901479	0.367334	0.999963	Glutamatergic	up
Tnfrsf13b	2.20205	0.881926	1.04864	0.841017	0.400338	0.999963	Glutamatergic	up
Bmp7	5.44456	0.880909	0.748812	1.17641	0.239432	0.999963	Glutamatergic	up
Kbtbd13	0.512898	0.880079	2.81892	0.312205	0.754885	0.999963	Glutamatergic	up
Serpinf2	1.01359	0.879453	1.72265	0.510523	0.609685	0.999963	Glutamatergic	up
Renbp	2.35671	0.879254	1.17172	0.750398	0.453015	0.999963	Glutamatergic	up
Emp1	3.12295	0.879165	0.982833	0.894521	0.371043	0.999963	Glutamatergic	up
Gm14434	0.395839	0.879067	3.13072	0.280787	0.778874	0.999963	Glutamatergic	up
Phf11a	0.395839	0.879067	3.13072	0.280787	0.778874	0.999963	Glutamatergic	up
Gm136	0.536205	0.878774	2.74263	0.320412	0.748656	0.999963	Glutamatergic	up
Lilrb4a	0.409924	0.878599	3.09354	0.284011	0.776402	0.999963	Glutamatergic	up
Sun3	0.955185	0.875172	1.62687	0.537948	0.590613	0.999963	Glutamatergic	up
Dthd1	3.11582	0.873449	1.03716	0.842157	0.3997	0.999963	Glutamatergic	up
Tnni3	2.17624	0.872817	1.09056	0.800335	0.423517	0.999963	Glutamatergic	up
Vmn1r168	1.77755	0.872558	1.42062	0.614209	0.539077	0.999963	Glutamatergic	up
Mboat4	3.79682	0.87199	0.956174	0.911957	0.361791	0.999963	Glutamatergic	up
Myof	9.31796	0.871213	0.537796	1.61997	0.105239	0.999963	Glutamatergic	up
Zfp456	7.08815	0.870774	0.665632	1.30819	0.190808	0.999963	Glutamatergic	up
Exoc3l4	2.58811	0.868955	1.03037	0.843339	0.399039	0.999963	Glutamatergic	up
C1qtnf7	5.33107	0.867734	0.826894	1.04939	0.293999	0.999963	Glutamatergic	up
Rgs21	1.90255	0.86741	1.42301	0.60956	0.542153	0.999963	Glutamatergic	up
Gper1	4.67255	0.866002	0.757288	1.14356	0.252807	0.999963	Glutamatergic	up
Mcidas	1.80909	0.863452	1.33482	0.646866	0.517719	0.999963	Glutamatergic	up
Tead4	6.28175	0.860333	0.794184	1.08329	0.278679	0.999963	Glutamatergic	up
Ifi207	0.48061	0.858342	2.92046	0.293906	0.768829	0.999963	Glutamatergic	up
Pdpn	4.0588	0.857696	1.08776	0.788497	0.430406	0.999963	Glutamatergic	up
Has2	0.917364	0.857485	1.67995	0.510424	0.609754	0.999963	Glutamatergic	up
Ngb	10.3622	0.85608	0.537201	1.59359	0.111027	0.999963	Glutamatergic	up
Odf3l2	1.04561	0.854752	1.77616	0.481235	0.630349	0.999963	Glutamatergic	up
Foxd2	0.290055	0.852632	3.14585	0.271034	0.786365	0.999963	Glutamatergic	up
Slc6a2	0.290055	0.852632	3.14585	0.271034	0.786365	0.999963	Glutamatergic	up
Fitm1	1.14712	0.851961	1.73289	0.491643	0.622972	0.999963	Glutamatergic	up
Phgr1	0.162489	0.851425	3.14472	0.270747	0.78658538473347706	0.999963	Glutamatergic	up
Tas1r2	0.162489	0.851425	3.14472	0.270747	0.78658538473347706	0.999963	Glutamatergic	up
Gm9008	0.162489	0.851425	3.14472	0.270747	0.78658538473347706	0.999963	Glutamatergic	up
Mgat4d	0.162489	0.851425	3.14472	0.270747	0.78658538473347706	0.999963	Glutamatergic	up
Ooep	0.162489	0.851425	3.14472	0.270747	0.78658538473347706	0.999963	Glutamatergic	up
Ush1g	0.162489	0.851425	3.14472	0.270747	0.78658538473347706	0.999963	Glutamatergic	up
Gzma	0.162489	0.851425	3.14472	0.270747	0.78658538473347706	0.999963	Glutamatergic	up
Slc6a14	0.162489	0.851425	3.14472	0.270747	0.78658538473347706	0.999963	Glutamatergic	up
Klc3	4.34205	0.848053	0.769723	1.10176	0.270564	0.999963	Glutamatergic	up
Acsbg2	0.776739	0.845292	1.88361	0.448763	0.653603	0.999963	Glutamatergic	up
Uox	4.69375	0.842961	0.798056	1.05627	0.290846	0.999963	Glutamatergic	up
Slc26a9	0.263892	0.842677	3.14372	0.268051	0.78866	0.999963	Glutamatergic	up
S100a8	0.263892	0.842677	3.14372	0.268051	0.78866	0.999963	Glutamatergic	up
Clec4b1	0.263892	0.842677	3.14372	0.268051	0.78866	0.999963	Glutamatergic	up
Kctd19	0.263892	0.842677	3.14372	0.268051	0.78866	0.999963	Glutamatergic	up
1700025F22Rik	0.263892	0.842677	3.14372	0.268051	0.78866	0.999963	Glutamatergic	up
Cblc	2.2666	0.842659	1.15117	0.732001	0.464168	0.999963	Glutamatergic	up
Thbd	4.48124	0.841638	0.917512	0.917305	0.358983	0.999963	Glutamatergic	up
Rab20	0.677386	0.841535	1.95633	0.430159	0.66708	0.999963	Glutamatergic	up
Dio3	0.458942	0.841282	2.9381	0.286336	0.774621	0.999963	Glutamatergic	up
Rab32	4.85556	0.841231	0.706316	1.19101	0.233649	0.999963	Glutamatergic	up
Jmjd7	14.9327	0.840409	0.464306	1.81003	0.0702906	0.999963	Glutamatergic	up
H2-Oa	0.312714	0.839999	3.11939	0.269283	0.787712	0.999963	Glutamatergic	up
Galntl5	0.312714	0.839999	3.11939	0.269283	0.787712	0.999963	Glutamatergic	up
Ecel1	5.19731	0.839492	0.737894	1.13769	0.255251	0.999963	Glutamatergic	up
Ttll6	2.20325	0.837699	1.29622	0.646263	0.518109	0.999963	Glutamatergic	up
Duxbl3	0.483954	0.836358	2.35264	0.355498	0.722217	0.999963	Glutamatergic	up
Tekt1	10.3512	0.836215	0.585805	1.42746	0.153447	0.999963	Glutamatergic	up
Dok1	0.452608	0.835848	2.41007	0.346816	0.72873	0.999963	Glutamatergic	up
Olfr678	0.703295	0.835615	2.21745	0.376837	0.706295	0.999963	Glutamatergic	up
Eomes	0.500706	0.835562	2.84874	0.293309	0.769286	0.999963	Glutamatergic	up
Tspan1	3.03115	0.831666	0.907622	0.916313	0.359503	0.999963	Glutamatergic	up
Ncf4	0.482558	0.829349	2.87279	0.288691	0.772818	0.999963	Glutamatergic	up
Spata18	0.43278	0.828485	3.01098	0.275155	0.783197	0.999963	Glutamatergic	up
Gpsm3	1.65563	0.827324	1.30011	0.63635	0.524548	0.999963	Glutamatergic	up
Ppic	1.65938	0.82484	1.27938	0.644721	0.519108	0.999963	Glutamatergic	up
Ctrl	6.06581	0.824302	0.694709	1.18654	0.235408	0.999963	Glutamatergic	up
Fam209	1.5214	0.824194	1.3421	0.614108	0.539144	0.999963	Glutamatergic	up
Gsg1l2	0.72155	0.824112	2.19635	0.375218	0.707498	0.999963	Glutamatergic	up
Gm8113	0.598843	0.82362	2.16136	0.381065	0.703155	0.999963	Glutamatergic	up
Unc45b	1.38135	0.82341	1.36683	0.602424	0.546892	0.999963	Glutamatergic	up
Gucy2d	0.325794	0.821641	3.11968	0.263374	0.792263	0.999963	Glutamatergic	up
Prss56	0.325794	0.821641	3.11968	0.263374	0.792263	0.999963	Glutamatergic	up
C2cd4a	0.325794	0.821641	3.11968	0.263374	0.792263	0.999963	Glutamatergic	up
Olfr164	0.325794	0.821641	3.11968	0.263374	0.792263	0.999963	Glutamatergic	up
Dsp	0.393228	0.821308	3.1179	0.263417	0.792229	0.999963	Glutamatergic	up
Gabrr2	4.54768	0.821147	0.749769	1.0952	0.273429	0.999963	Glutamatergic	up
Epcam	0.31251	0.820451	3.11693	0.263224	0.792378	0.999963	Glutamatergic	up
Slc2a4	0.647388	0.8199	2.17023	0.377794	0.705584	0.999963	Glutamatergic	up
Bsph1	1.27923	0.819392	1.69981	0.482048	0.629772	0.999963	Glutamatergic	up
Magel2	1.05836	0.818001	1.97785	0.413581	0.679181	0.999963	Glutamatergic	up
Gm3264	2.74383	0.816141	0.970953	0.840557	0.400596	0.999963	Glutamatergic	up
Syce1	4.5689	0.815475	0.766934	1.06329	0.287649	0.999963	Glutamatergic	up
Pcdh18	3.41894	0.815422	0.922188	0.884225	0.376575	0.999963	Glutamatergic	up
Apold1	10.0531	0.815071	0.538681	1.51309	0.130258	0.999963	Glutamatergic	up
Acsm4	1.21386	0.814159	1.72829	0.471076	0.637586	0.999963	Glutamatergic	up
Glycam1	3.43302	0.81176	1.0469	0.775393	0.438107	0.999963	Glutamatergic	up
Acoxl	3.52178	0.808717	0.968712	0.834838	0.403809	0.999963	Glutamatergic	up
Ano1	1.52282	0.808377	1.52643	0.529587	0.596399	0.999963	Glutamatergic	up
Ankrd22	1.12961	0.808097	1.71349	0.471608	0.637206	0.999963	Glutamatergic	up
Myh8	1.64561	0.80587658743314206	1.28243	0.628396	0.529744	0.999963	Glutamatergic	up
Layn	30.9678	0.805575	0.4583	1.75775	0.0787908	0.999963	Glutamatergic	up
Gja3	0.244345	0.805366	3.1258	0.257651	0.796677	0.999963	Glutamatergic	up
Pdgfd	5.6176	0.805156	0.817719	0.984637	0.324803	0.999963	Glutamatergic	up
Slc4a5	3.23535	0.803344	0.920112	0.873094	0.382612	0.999963	Glutamatergic	up
Trpm8	2.02859	0.803046	1.16718	0.688025	0.491437	0.999963	Glutamatergic	up
Mndal	15.6407	0.802901	0.511418	1.56995	0.116427	0.999963	Glutamatergic	up
Fam216b	0.564489	0.800973	2.7018	0.296459	0.76688	0.999963	Glutamatergic	up
Hapln3	1.03308	0.800749	1.59599	0.501725	0.615861	0.999963	Glutamatergic	up
Hist1h4n	0.750765	0.799727	1.77476	0.450611	0.65227	0.999963	Glutamatergic	up
Casq2	0.764837	0.799512	1.87013	0.427517	0.669003	0.999963	Glutamatergic	up
Sebox	0.928092	0.799315	2.10068	0.380503	0.703572	0.999963	Glutamatergic	up
Myom3	1.89846	0.798908	1.2778	0.625224	0.531824	0.999963	Glutamatergic	up
Zfp36	3.42976	0.798601	0.890868	0.89643	0.370023	0.999963	Glutamatergic	up
Isg20	2.35005	0.797464	1.10016	0.72486	0.468538	0.999963	Glutamatergic	up
Lpin3	1.57346	0.796821	1.36484	0.583821	0.559341	0.999963	Glutamatergic	up
Omp	1.38127	0.796083	1.39955	0.568812	0.569484	0.999963	Glutamatergic	up
Olfr967	1.16133	0.795947	1.83164	0.434555	0.663886	0.999963	Glutamatergic	up
Fhl3	0.925088	0.793579	1.83074	0.433474	0.66467	0.999963	Glutamatergic	up
Accsl	5.95304	0.793495	0.664642	1.19387	0.232529	0.999963	Glutamatergic	up
Plaur	4.32102	0.79335	0.795817	0.9969	0.318813	0.999963	Glutamatergic	up
Sdsl	2.03539	0.792951	1.3652	0.580831	0.561354	0.999963	Glutamatergic	up
Ccnb1ip1	5.07642	0.791797	0.733337	1.07972	0.280268	0.999963	Glutamatergic	up
Plekhg4	30.8088	0.789704	0.293495	2.69069	0.00713041	0.999963	Glutamatergic	up
Cyp2c55	2.1498	0.789651	1.15372	0.684438	0.493699	0.999963	Glutamatergic	up
Deup1	1.16013	0.789555	1.62287	0.486518	0.6266	0.999963	Glutamatergic	up
D630044L22Rik	5.70931	0.788128	0.720502	1.09386	0.274017	0.999963	Glutamatergic	up
Uba1y	0.677547	0.788015	2.11537	0.372518	0.709507	0.999963	Glutamatergic	up
Gstp2	1.86372	0.787826	1.3639	0.577627	0.563516	0.999963	Glutamatergic	up
Ska1	1.00338	0.786976	1.66438	0.472834	0.636332	0.999963	Glutamatergic	up
Hoga1	13.341	0.786449	0.472173	1.66559	0.0957945	0.999963	Glutamatergic	up
Gm11808	5.15411	0.784979	0.854602	0.918531	0.358341	0.999963	Glutamatergic	up
Enpep	3.0369	0.78306	1.05655	0.74115	0.458602	0.999963	Glutamatergic	up
Hist4h4	8.16196	0.780893	0.569206	1.3719	0.170095	0.999963	Glutamatergic	up
Calr4	0.751442	0.780017	2.38671	0.326817	0.743806	0.999963	Glutamatergic	up
Myzap	6.06973	0.77986	0.765565	1.01867	0.308358	0.999963	Glutamatergic	up
Bmp4	1.57115	0.777915	1.44477	0.538435	0.590277	0.999963	Glutamatergic	up
Tmprss11c	0.948634	0.777763	1.68229	0.462323	0.643849	0.999963	Glutamatergic	up
Tex45	3.51378	0.777475	0.861475	0.902492	0.366795	0.999963	Glutamatergic	up
Il27	9.27938	0.776358	0.56653	1.37037	0.17057	0.999963	Glutamatergic	up
Lyg2	0.162897	0.775674	3.13729	0.247243	0.80472	0.999963	Glutamatergic	up
Vmn1r83	0.162897	0.775674	3.13729	0.247243	0.80472	0.999963	Glutamatergic	up
Gm10322	0.162897	0.775674	3.13729	0.247243	0.80472	0.999963	Glutamatergic	up
Csf3	0.162897	0.775674	3.13729	0.247243	0.80472	0.999963	Glutamatergic	up
Uts2b	0.162897	0.775674	3.13729	0.247243	0.80472	0.999963	Glutamatergic	up
Gm7102	0.162897	0.775674	3.13729	0.247243	0.80472	0.999963	Glutamatergic	up
1700018G05Rik	0.162897	0.775674	3.13729	0.247243	0.80472	0.999963	Glutamatergic	up
Aplnr	1.16527	0.774733	1.82423	0.42469	0.671062	0.999963	Glutamatergic	up
Ifi44	0.700199	0.774593	2.09687	0.369404	0.711827	0.999963	Glutamatergic	up
Pde11a	28.1553	0.774235	0.457364	1.69282	0.0904898	0.999963	Glutamatergic	up
Rnase4	4.7499	0.773977	0.782454	0.989166	0.322582	0.999963	Glutamatergic	up
Gypc	10.0282	0.773617	0.533581	1.44986	0.147097	0.999963	Glutamatergic	up
Ang	0.974827	0.773326	1.98771	0.389055	0.697235	0.999963	Glutamatergic	up
Lrrc31	0.524297	0.772579	3.11154	0.248295	0.803906	0.999963	Glutamatergic	up
Slc5a7	1.30697	0.772304	1.6768	0.460583	0.645098	0.999963	Glutamatergic	up
Fam181a	0.952003	0.771315	2.03827	0.378416	0.705122	0.999963	Glutamatergic	up
Gja4	3.15972	0.769232	0.998866	0.770105	0.441237	0.999963	Glutamatergic	up
Fam50b	0.436914	0.766846	3.11386	0.246269	0.805474	0.999963	Glutamatergic	up
Myl2	0.355882	0.765187	3.13868	0.243792	0.807392	0.999963	Glutamatergic	up
Slc22a18	0.355882	0.765187	3.13868	0.243792	0.807392	0.999963	Glutamatergic	up
Slc27a6	1.05878	0.765026	1.67749	0.456055	0.64835	0.999963	Glutamatergic	up
Cox7a1	3.65435	0.763353	0.926174	0.824201	0.409826	0.999963	Glutamatergic	up
Defb42	2.39475	0.762312	1.04735	0.727848	0.466707	0.999963	Glutamatergic	up
Six1	0.331784	0.761976	3.10964	0.245037	0.806428	0.999963	Glutamatergic	up
Pdzph1	5.10343	0.761915	0.776874	0.980744	0.326719	0.999963	Glutamatergic	up
Kcnj14	3.34117	0.761633	0.995556	0.765033	0.444252	0.999963	Glutamatergic	up
Fcgr1	0.808206	0.761402	1.73053	0.439982	0.65995	0.999963	Glutamatergic	up
Vmn2r91	0.349531	0.758473	3.11727	0.243313	0.807763	0.999963	Glutamatergic	up
8030474K03Rik	0.349531	0.758473	3.11727	0.243313	0.807763	0.999963	Glutamatergic	up
Kif4	3.41796	0.75781	0.860983	0.880168	0.378768	0.999963	Glutamatergic	up
Vmn1r183	2.49263	0.754637	1.06227	0.710403	0.477455	0.999963	Glutamatergic	up
Cyp2c23	4.01412	0.754257	0.864208	0.872772	0.382787	0.999963	Glutamatergic	up
Apod	25.5449	0.752581	0.407432	1.84713	0.0647281	0.999963	Glutamatergic	up
Vmn1r224	0.825662	0.751485	2.17199	0.34599	0.72935	0.999963	Glutamatergic	up
Pdgfrb	7.53763	0.750778	0.635671	1.18108	0.237571	0.999963	Glutamatergic	up
Gpx8	2.38915	0.749268	1.27721	0.586644	0.557443	0.999963	Glutamatergic	up
Gjd2	3.25751	0.748898	1.09258	0.685439	0.493067	0.999963	Glutamatergic	up
Sec14l4	1.48193	0.74752	1.54453	0.483977	0.628402	0.999963	Glutamatergic	up
Il1a	1.07201	0.746858	1.69809	0.439822	0.660066	0.999963	Glutamatergic	up
Elfn1	30.2228	0.746578	0.366254	2.03842	0.0415083	0.999963	Glutamatergic	up
Nox4	5.13671	0.745265	0.697611	1.06831	0.285381	0.999963	Glutamatergic	up
Mettl21e	2.29451	0.744515	1.28621	0.578843	0.562695	0.999963	Glutamatergic	up
H2-Eb1	1.66605	0.74428	1.20998	0.615115	0.538479	0.999963	Glutamatergic	up
Sgsh	4.88055	0.744139	0.74673	0.996529	0.318993	0.999963	Glutamatergic	up
P2rx5	6.83834	0.743216	0.645542	1.1513	0.249607	0.999963	Glutamatergic	up
Irs4	0.300642	0.742671	3.13007	0.237269	0.812448	0.999963	Glutamatergic	up
Gucy2f	2.51048	0.740035	1.00521	0.736202	0.461608	0.999963	Glutamatergic	up
Gm4969	2.2793	0.734496	1.12637	0.652092	0.514342	0.999963	Glutamatergic	up
Cdca7	4.86681	0.734237	0.875129	0.839004	0.401467	0.999963	Glutamatergic	up
Hspb8	2.45773	0.734014	1.09414	0.670861	0.502309	0.999963	Glutamatergic	up
Cnr2	1.20733	0.733246	1.4834	0.4943	0.621094	0.999963	Glutamatergic	up
Pcolce	2.29598	0.730099	1.17965	0.618912	0.535974	0.999963	Glutamatergic	up
Tmem100	5.61793	0.729336	0.70082	1.04069	0.29802	0.999963	Glutamatergic	up
Ifi204	0.989212	0.729265	1.53658	0.474602	0.635071	0.999963	Glutamatergic	up
Vwa7	1.81311	0.72897	1.35158	0.539348	0.589647	0.999963	Glutamatergic	up
Slfn9	0.64435	0.728651	2.10972	0.345378	0.72981	0.999963	Glutamatergic	up
D930007J09Rik	1.17527	0.728387	1.62796	0.447423	0.65457	0.999963	Glutamatergic	up
Kcnip1	23.6782	0.727119	0.522049	1.39282	0.163675	0.999963	Glutamatergic	up
Tpbgl	1.29973	0.726925	1.40356	0.517916	0.604517	0.999963	Glutamatergic	up
Pdia2	5.61518	0.726515	0.731486	0.993204	0.320611	0.999963	Glutamatergic	up
AW551984	2.91612	0.726264	0.947575	0.766445	0.443412	0.999963	Glutamatergic	up
Ccdc170	6.40736	0.724981	0.633755	1.14395	0.252646	0.999963	Glutamatergic	up
Prok2	1.964	0.724231	1.22894	0.589314	0.555651	0.999963	Glutamatergic	up
Glipr1l3	2.40005	0.724041	1.05709	0.684935	0.493385	0.999963	Glutamatergic	up
Rab39	26.0177	0.723259	0.337349	2.14395	0.032037	0.999963	Glutamatergic	up
Zbtb32	3.54408	0.723246	0.815053	0.887362	0.374884	0.999963	Glutamatergic	up
Gm21962	0.174766	0.720155	3.1333	0.229839	0.818217	0.999963	Glutamatergic	up
Rnase6	0.174766	0.720155	3.1333	0.229839	0.818217	0.999963	Glutamatergic	up
Olfr1140	0.174766	0.720155	3.1333	0.229839	0.818217	0.999963	Glutamatergic	up
Astl	0.174766	0.720155	3.1333	0.229839	0.818217	0.999963	Glutamatergic	up
Olfr1351	0.174766	0.720155	3.1333	0.229839	0.818217	0.999963	Glutamatergic	up
Olfr30	0.174766	0.720155	3.1333	0.229839	0.818217	0.999963	Glutamatergic	up
Lnp1	0.174766	0.720155	3.1333	0.229839	0.818217	0.999963	Glutamatergic	up
Gm18336	0.174766	0.720155	3.1333	0.229839	0.818217	0.999963	Glutamatergic	up
Cdca2	3.53268	0.719552	0.863575	0.833225	0.404718	0.999963	Glutamatergic	up
Ckap2l	7.67057	0.717569	0.591574	1.21298	0.225137	0.999963	Glutamatergic	up
Plod1	11.0167	0.717501	0.499812	1.43554	0.151133	0.999963	Glutamatergic	up
Lcat	3.35229	0.714783	0.971977	0.735391	0.462101	0.999963	Glutamatergic	up
Tm4sf1	5.36486	0.713927	0.721609	0.989354	0.32249	0.999963	Glutamatergic	up
Opn1mw	6.81129	0.711811	0.649385	1.09613	0.273022	0.999963	Glutamatergic	up
Hist1h1e	10.5458	0.709501	0.534017	1.32861	0.183976	0.999963	Glutamatergic	up
Sec14l3	0.343653	0.706643	3.10575	0.227527	0.820014	0.999963	Glutamatergic	up
Lrg1	4.29454	0.706475	0.836297	0.844765	0.398242	0.999963	Glutamatergic	up
Slc15a5	1.08444	0.70567	1.66452	0.423947	0.671604	0.999963	Glutamatergic	up
Tll2	9.52517	0.704774	0.543059	1.29779	0.194361	0.999963	Glutamatergic	up
Gm11444	1.95079	0.704491	1.1955	0.589286	0.555669	0.999963	Glutamatergic	up
Anxa2	1.8178	0.704296	1.23275	0.57132	0.567783	0.999963	Glutamatergic	up
Caps2	1.28631	0.704133	1.3483833643782701	0.522205	0.601527	0.999963	Glutamatergic	up
Olfr986	5.59261	0.702175	0.689557	1.0183	0.308536	0.999963	Glutamatergic	up
Dusp27	0.544328	0.698719	2.33146	0.299691	0.764413	0.999963	Glutamatergic	up
Slc12a7	3.72383	0.697831	0.832361	0.838375	0.40182	0.999963	Glutamatergic	up
Dcn	11.2088	0.697421	0.5385	1.29512	0.19528	0.999963	Glutamatergic	up
Zbtb3	4.91392	0.696796	0.798894	0.8722	0.383099	0.999963	Glutamatergic	up
Slc26a7	18.6568	0.696576	0.385781	1.80562	0.0709771	0.999963	Glutamatergic	up
Rnf17	110.816	0.696163	0.218592	3.18476	0.00144876	0.860411	Glutamatergic	up
S100a3	1.5124	0.695961	1.56925	0.443498	0.657406	0.999963	Glutamatergic	up
Tssk4	4.74677	0.695337	0.729589	0.953052	0.340563	0.999963	Glutamatergic	up
S100a2	6.2226	0.694929	0.69266	1.00328	0.315728	0.999963	Glutamatergic	up
Gm5901	3.33162	0.694474	0.933071	0.744289	0.456702	0.999963	Glutamatergic	up
Glrp1	0.759447	0.694003	1.91099	0.363164	0.716482	0.999963	Glutamatergic	up
Nxph1	229.415	0.693372	0.473734	1.46363	0.143294	0.999963	Glutamatergic	up
Bin2	2.0099	0.693084	1.27114	0.545246	0.585585	0.999963	Glutamatergic	up
Kdf1	4.19432	0.691217	0.846512	0.816546	0.414188	0.999963	Glutamatergic	up
Popdc3	6.23052	0.690523	0.648267	1.06518	0.286794	0.999963	Glutamatergic	up
Misp	12.1451	0.689094	0.517416	1.3318	0.182926	0.999963	Glutamatergic	up
Zfp993	6.21255	0.688836	0.626544	1.09942	0.271584	0.999963	Glutamatergic	up
Zfp296	4.12393	0.686761	0.804955	0.853167	0.393566	0.999963	Glutamatergic	up
Ankub1	10.1709	0.685912	0.522715	1.31221	0.189449	0.999963	Glutamatergic	up
Prss16	6.23472	0.685342	0.706399	0.970191	0.331951	0.999963	Glutamatergic	up
Neu4	2.82482	0.685192	1.10475	0.620222	0.535112	0.999963	Glutamatergic	up
Plekhs1	5.9491	0.685151	0.674624	1.0156	0.309818	0.999963	Glutamatergic	up
Psma8	2.105	0.684949	1.09273	0.626826	0.530773	0.999963	Glutamatergic	up
Adamtsl5	7.07138	0.684658	0.649148	1.0547	0.291561	0.999963	Glutamatergic	up
Trim30c	1.25672	0.683434	1.37766	0.496082	0.619837	0.999963	Glutamatergic	up
Arid3c	3.89692	0.683021	0.844032	0.809235	0.41838	0.999963	Glutamatergic	up
Lrrc10	1.52671	0.682124	1.46914	0.464301	0.642432	0.999963	Glutamatergic	up
Batf2	5.46941	0.681616	0.724957	0.940216	0.347107	0.999963	Glutamatergic	up
Gm5678	1.6977	0.679685	1.3249	0.513008	0.607946	0.999963	Glutamatergic	up
Mc4r	6.42041	0.679464	0.810186	0.838652	0.401665	0.999963	Glutamatergic	up
Cd79a	5.39914	0.678698	0.681402	0.996033	0.319234	0.999963	Glutamatergic	up
Lipk	7.12129	0.67846	0.789576	0.859271	0.390191	0.999963	Glutamatergic	up
Olfr365	0.719853	0.678413	2.432	0.278952	0.780281	0.999963	Glutamatergic	up
Gm11361	0.407695	0.676011	3.11559	0.216977	0.828226	0.999963	Glutamatergic	up
Ttc36	4.32563	0.675623	0.789605	0.855647	0.392193	0.999963	Glutamatergic	up
Etv4	74.0727	0.674468	0.219545	3.07212	0.00212546	0.999963	Glutamatergic	up
4930546C10Rik	3.29405	0.673894	0.960487	0.701616	0.482918	0.999963	Glutamatergic	up
Zan	5.71792	0.67375	0.734429	0.917378	0.358944	0.999963	Glutamatergic	up
Gpr139	12.9108	0.67308	0.57061	1.17958	0.238168	0.999963	Glutamatergic	up
Olfr535	1.35728	0.672034	1.48349	0.45301	0.650541	0.999963	Glutamatergic	up
Pkp3	1.93409	0.671451	1.19031	0.564098	0.572688	0.999963	Glutamatergic	up
Cdhr4	2.56667	0.670141	1.18015	0.567842	0.570142	0.999963	Glutamatergic	up
Slc22a20	1.05349	0.669223	1.87954	0.356056	0.721798	0.999963	Glutamatergic	up
Crhr2	5.06183	0.668201	0.727762	0.91816	0.358535	0.999963	Glutamatergic	up
Mea1	13.5768	0.666475	0.46728	1.42628	0.153786	0.999963	Glutamatergic	up
Tcn2	1.03879	0.666385	1.76804	0.376906	0.706243	0.999963	Glutamatergic	up
Tarm1	2.66029	0.665548	1.09242	0.609243	0.542363	0.999963	Glutamatergic	up
Cyp3a13	1.13792	0.665188	1.93092	0.344493	0.730475	0.999963	Glutamatergic	up
Prr5	1.30978	0.663521	1.93857	0.342274	0.732145	0.999963	Glutamatergic	up
Muc13	2.46492	0.660469	1.05235	0.627615	0.530256	0.999963	Glutamatergic	up
Vmn2r10	5.26136	0.6598	0.809732	0.814839	0.415165	0.999963	Glutamatergic	up
Ndufa4l2	1.99365	0.659157	1.31476	0.50135	0.616125	0.999963	Glutamatergic	up
Wdr49	14.5329	0.658319	0.43424	1.51603	0.129512	0.999963	Glutamatergic	up
Olfr1425	1.80069	0.65754	1.32127	0.497657	0.618726	0.999963	Glutamatergic	up
Fgf17	4.74387	0.654253	0.815506	0.802267	0.422399	0.999963	Glutamatergic	up
Zfp600	0.83916	0.65413	2.13561	0.306297	0.759378	0.999963	Glutamatergic	up
Tnfrsf25	208.229	0.653603	0.204765	3.19197	0.00141308	0.860411	Glutamatergic	up
Tigit	0.0873829	0.651681	3.1606	0.206189	0.836643	0.999963	Glutamatergic	up
Capn8	0.0873829	0.651681	3.1606	0.206189	0.836643	0.999963	Glutamatergic	up
Ghsr	0.0873829	0.651681	3.1606	0.206189	0.836643	0.999963	Glutamatergic	up
Atp6v1fnb	0.0873829	0.651681	3.1606	0.206189	0.836643	0.999963	Glutamatergic	up
Gm20594	0.0873829	0.651681	3.1606	0.206189	0.836643	0.999963	Glutamatergic	up
Igbp1b	0.0873829	0.651681	3.1606	0.206189	0.836643	0.999963	Glutamatergic	up
Trim29	0.0873829	0.651681	3.1606	0.206189	0.836643	0.999963	Glutamatergic	up
Rtl3	0.0873829	0.651681	3.1606	0.206189	0.836643	0.999963	Glutamatergic	up
Sftpb	3.43468	0.650759	0.843906	0.771128	0.440631	0.999963	Glutamatergic	up
Wnt7b	27.1689	0.650354	0.350064	1.85782	0.0631952	0.999963	Glutamatergic	up
Baz1a	326.202	0.64992	0.175852	3.69583	2.1916863189679e-4	0.264595	Glutamatergic	up
Vpreb1	1.89774	0.649826	1.22305	0.531317	0.595199	0.999963	Glutamatergic	up
Ush1c	0.950433	0.649615	1.76831	0.367365	0.713347	0.999963	Glutamatergic	up
Smagp	1.95724	0.64909	1.25363	0.517769	0.604619	0.999963	Glutamatergic	up
Uaca	8.25494	0.648041	0.555384	1.16683	0.243277	0.999963	Glutamatergic	up
Bcan	21.1369	0.647139	0.39872540475192503	1.62302	0.104585	0.999963	Glutamatergic	up
4930524B15Rik	3.13739	0.647097	0.887522	0.729106	0.465937	0.999963	Glutamatergic	up
Vmn2r114	1.14558	0.646982	1.79781	0.359873	0.718942	0.999963	Glutamatergic	up
Slc22a12	4.16246	0.646915	0.821061	0.787901	0.430755	0.999963	Glutamatergic	up
Mgat4e	1.47108	0.646508	1.39004	0.4651	0.64186	0.999963	Glutamatergic	up
Daam2	6.63375	0.646033	0.721288	0.895665	0.370432	0.999963	Glutamatergic	up
Amigo3	7.63522	0.645773	0.586171	1.10168	0.270601	0.999963	Glutamatergic	up
Dusp4	43.5961	0.644929	0.275599	2.3401	0.0192786	0.999963	Glutamatergic	up
Gm11273	2.2279	0.642642	1.08072	0.594645	0.552081	0.999963	Glutamatergic	up
Tlr12	0.25627	0.641369	3.13251	0.204746	0.83777	0.999963	Glutamatergic	up
Cav3	0.25627	0.641369	3.13251	0.204746	0.83777	0.999963	Glutamatergic	up
Olfr1156	3.77701	0.641094	0.887196	0.722606	0.469922	0.999963	Glutamatergic	up
1700014D04Rik	3.6842	0.63906	0.868878	0.735501	0.462034	0.999963	Glutamatergic	up
Adprhl1	5.4418	0.638718	0.687467	0.929089	0.352843	0.999963	Glutamatergic	up
Akap3	1.76638	0.638159	1.25884	0.50694	0.612197	0.999963	Glutamatergic	up
Fbln7	7.07642	0.637733	0.664422	0.959831	0.33714	0.999963	Glutamatergic	up
Rarres2	2.09022	0.637134	1.19444	0.533415	0.593746	0.999963	Glutamatergic	up
Sp100	4.36683	0.636205	0.86808	0.732888	0.463627	0.999963	Glutamatergic	up
Lif	0.0814485	0.635745	3.15881	0.201261	0.840495	0.999963	Glutamatergic	up
Defb30	0.0814485	0.635745	3.15881	0.201261	0.840495	0.999963	Glutamatergic	up
Ccl3	0.0814485	0.635745	3.15881	0.201261	0.840495	0.999963	Glutamatergic	up
Scp2d1	0.0814485	0.635745	3.15881	0.201261	0.840495	0.999963	Glutamatergic	up
Bglap	0.0814485	0.635745	3.15881	0.201261	0.840495	0.999963	Glutamatergic	up
Gm10300	0.0814485	0.635745	3.15881	0.201261	0.840495	0.999963	Glutamatergic	up
Esrp2	0.0814485	0.635745	3.15881	0.201261	0.840495	0.999963	Glutamatergic	up
Gcm1	0.0814485	0.635745	3.15881	0.201261	0.840495	0.999963	Glutamatergic	up
Vnn3	0.0814485	0.635745	3.15881	0.201261	0.840495	0.999963	Glutamatergic	up
Fbp2	0.0814485	0.635745	3.15881	0.201261	0.840495	0.999963	Glutamatergic	up
Gm8108	0.0814485	0.635745	3.15881	0.201261	0.840495	0.999963	Glutamatergic	up
Eras	0.0814485	0.635745	3.15881	0.201261	0.840495	0.999963	Glutamatergic	up
Slc16a8	0.454756	0.635153	2.94903	0.215377	0.829473	0.999963	Glutamatergic	up
Gm10800	0.71328	0.634942	2.06147	0.308004	0.758079	0.999963	Glutamatergic	up
Mgst2	2.58244	0.634755	1.01889	0.622985	0.533294	0.999963	Glutamatergic	up
Ccdc36	14.9423	0.632309	0.434709	1.45456	0.145792	0.999963	Glutamatergic	up
Trim71	91.284	0.63206	0.222961	2.83485	0.00458477	0.999963	Glutamatergic	up
Tac1	4.68435	0.631286	0.780418	0.808908	0.418568	0.999963	Glutamatergic	up
Wdr86	0.985935	0.630747	1.7269	0.365249	0.714926	0.999963	Glutamatergic	up
Gm13306	2.98904	0.630655	0.967502	0.651838	0.514505	0.999963	Glutamatergic	up
Klk8	0.790037	0.630631	1.97133	0.319901	0.749044	0.999963	Glutamatergic	up
Rnd3	206.929	0.630315	0.134686	4.67989	2.87032086699055e-6	0.0123718	Glutamatergic	up
Casp4	1.75207	0.630185	1.26297	0.49897	0.617801	0.999963	Glutamatergic	up
Sapcd1	3.24981	0.629356	0.916695	0.686549	0.492367	0.999963	Glutamatergic	up
Pnoc	2.49079	0.629349	1.13998	0.552069	0.580901	0.999963	Glutamatergic	up
Unc5b	13.1332	0.628923	0.47459	1.32519	0.185108	0.999963	Glutamatergic	up
Paqr6	4.3165	0.628374	0.871552	0.720983	0.47092	0.999963	Glutamatergic	up
Gpat2	4.42563	0.628298	0.937119	0.670457	0.502566	0.999963	Glutamatergic	up
Bcl3	1.26059	0.627483	1.5225	0.41214	0.680237	0.999963	Glutamatergic	up
1810062G17Rik	1.87897	0.627393	1.20837	0.519208	0.603616	0.999963	Glutamatergic	up
Il22	0.699962	0.626991	1.93021	0.32483	0.74531	0.999963	Glutamatergic	up
Clec10a	1.73553	0.626435	1.20823	0.518473	0.604128	0.999963	Glutamatergic	up
Tmem37	2.6219	0.626104	1.00262	0.624466	0.532322	0.999963	Glutamatergic	up
Rem1	0.350612	0.625925	3.13073	0.19993	0.841536	0.999963	Glutamatergic	up
Ptx3	0.350612	0.625925	3.13073	0.19993	0.841536	0.999963	Glutamatergic	up
Lrr1	0.350612	0.625925	3.13073	0.19993	0.841536	0.999963	Glutamatergic	up
Onecut1	0.402505	0.625898	2.52219	0.248157	0.804013	0.999963	Glutamatergic	up
Gja10	0.507163	0.623977	2.80408	0.222525	0.823905	0.999963	Glutamatergic	up
Ifnlr1	2.55991	0.623828	0.992692	0.62842	0.529729	0.999963	Glutamatergic	up
Tlr13	0.715716	0.622244	2.26409	0.274832	0.783445	0.999963	Glutamatergic	up
Cntnap3	85.7705	0.622169	0.206861	3.00767	0.00263263	0.999963	Glutamatergic	up
Olfr374	2.55037	0.621453	1.05815	0.587304	0.557	0.999963	Glutamatergic	up
Aym1	0.594044	0.620843	2.6366	0.235471	0.813843	0.999963	Glutamatergic	up
Sspo	0.277978	0.620384	3.14782	0.197084	0.843762	0.999963	Glutamatergic	up
Htra3	1.80254	0.620348	1.25745	0.493337	0.621774	0.999963	Glutamatergic	up
Cyp27a1	2.52175	0.618631	1.2955	0.477523	0.63299	0.999963	Glutamatergic	up
Colec11	10.4466	0.618036	0.492646	1.25452	0.209652	0.999963	Glutamatergic	up
Gpc2	1.46115	0.617942	1.7294	0.357317	0.720855	0.999963	Glutamatergic	up
Gpr101	0.656776	0.617295	2.51668	0.245281	0.806239	0.999963	Glutamatergic	up
Gm21671	0.131946	0.61697	3.15656	0.195456	0.845036	0.999963	Glutamatergic	up
Lgals2	0.131946	0.61697	3.15656	0.195456	0.845036	0.999963	Glutamatergic	up
Angptl4	0.131946	0.61697	3.15656	0.195456	0.845036	0.999963	Glutamatergic	up
Oas1g	0.131946	0.61697	3.15656	0.195456	0.845036	0.999963	Glutamatergic	up
Spp2	0.131946	0.61697	3.15656	0.195456	0.845036	0.999963	Glutamatergic	up
Serpinb2	0.131946	0.61697	3.15656	0.195456	0.845036	0.999963	Glutamatergic	up
Tacstd2	0.131946	0.61697	3.15656	0.195456	0.845036	0.999963	Glutamatergic	up
Hist1h4k	0.131946	0.61697	3.15656	0.195456	0.845036	0.999963	Glutamatergic	up
F2rl1	0.131946	0.61697	3.15656	0.195456	0.845036	0.999963	Glutamatergic	up
Gm10338	0.131946	0.61697	3.15656	0.195456	0.845036	0.999963	Glutamatergic	up
Gata6	0.131946	0.61697	3.15656	0.195456	0.845036	0.999963	Glutamatergic	up
AC132444.5	0.131946	0.61697	3.15656	0.195456	0.845036	0.999963	Glutamatergic	up
Rnf151	0.538101	0.615776	2.25015	0.27366	0.784346	0.999963	Glutamatergic	up
Stkld1	6.24905	0.615714	0.674502	0.912843	0.361325	0.999963	Glutamatergic	up
Olfr550	3.04981	0.615487	0.98796	0.622988	0.533292	0.999963	Glutamatergic	up
Ggt1	2.15425	0.614855	1.1132	0.552333	0.58072	0.999963	Glutamatergic	up
Il18rap	0.0812447	0.614584	3.15626	0.194719	0.845613	0.999963	Glutamatergic	up
Cyp24a1	0.0812447	0.614584	3.15626	0.194719	0.845613	0.999963	Glutamatergic	up
B230104I21Rik	0.0812447	0.614584	3.15626	0.194719	0.845613	0.999963	Glutamatergic	up
Inmt	0.0812447	0.614584	3.15626	0.194719	0.845613	0.999963	Glutamatergic	up
Six5	0.0812447	0.614584	3.15626	0.194719	0.845613	0.999963	Glutamatergic	up
Art1	0.0812447	0.614584	3.15626	0.194719	0.845613	0.999963	Glutamatergic	up
Trim30b	0.0812447	0.614584	3.15626	0.194719	0.845613	0.999963	Glutamatergic	up
Cd209b	0.0812447	0.614584	3.15626	0.194719	0.845613	0.999963	Glutamatergic	up
Tex24	0.0812447	0.614584	3.15626	0.194719	0.845613	0.999963	Glutamatergic	up
Tdgf1	0.0812447	0.614584	3.15626	0.194719	0.845613	0.999963	Glutamatergic	up
Otx2	0.0812447	0.614584	3.15626	0.194719	0.845613	0.999963	Glutamatergic	up
A1bg	0.0812447	0.614584	3.15626	0.194719	0.845613	0.999963	Glutamatergic	up
Cldn6	0.0812447	0.614584	3.15626	0.194719	0.845613	0.999963	Glutamatergic	up
Prr32	0.0812447	0.614584	3.15626	0.194719	0.845613	0.999963	Glutamatergic	up
Gpr174	0.0812447	0.614584	3.15626	0.194719	0.845613	0.999963	Glutamatergic	up
Poteg	2.40364	0.614388	1.0279	0.597714	0.550031	0.999963	Glutamatergic	up
Ccdc63	7.3986	0.611799	0.594041	1.02989	0.30306	0.999963	Glutamatergic	up
Nlrp1b	1.8055	0.610009	1.19238	0.511588	0.608939	0.999963	Glutamatergic	up
Gm10762	23.4534	0.609985	0.341118	1.78819	0.073745	0.999963	Glutamatergic	up
Anxa8	0.300833	0.606814	3.12855	0.19396	0.846207	0.999963	Glutamatergic	up
Fcrl1	0.644027	0.606092	2.17841	0.278226	0.780838	0.999963	Glutamatergic	up
Vtn	7.51449	0.605571	0.865598	0.699598	0.484178	0.999963	Glutamatergic	up
Arhgef5	0.900332	0.605533	1.97313	0.30689	0.758927	0.999963	Glutamatergic	up
Baiap3	3.75801	0.604961	0.878497	0.688633	0.491055	0.999963	Glutamatergic	up
Gabra6	0.350408	0.604886	3.12823	0.193364	0.846674	0.999963	Glutamatergic	up
Tmprss9	19.9899	0.604414	0.394505	1.53208	0.125502	0.999963	Glutamatergic	up
Igsf1	2.06012	0.604368	1.06724	0.56629	0.571197	0.999963	Glutamatergic	up
Zfp474	0.470163	0.60323	2.91745	0.206767	0.836192	0.999963	Glutamatergic	up
Gas2l2	4.65438	0.602732	0.750948	0.802628	0.42219	0.999963	Glutamatergic	up
Olfr1271	0.145027	0.601666	3.15456	0.190729	0.848738	0.999963	Glutamatergic	up
Prrxl1	0.145027	0.601666	3.15456	0.190729	0.848738	0.999963	Glutamatergic	up
Apol10b	0.145027	0.601666	3.15456	0.190729	0.848738	0.999963	Glutamatergic	up
Sst	5.82197	0.597659	0.949139	0.629685	0.528901	0.999963	Glutamatergic	up
Zpbp2	1.99086	0.597322	1.26687	0.471496	0.637287	0.999963	Glutamatergic	up
Nr5a2	0.291263	0.597125	3.12642	0.190993	0.848531	0.999963	Glutamatergic	up
Tmem203	22.5026	0.595788	0.407891	1.46065	0.144111	0.999963	Glutamatergic	up
Lrrc72	2.36826	0.594737	1.14167	0.520935	0.602412	0.999963	Glutamatergic	up
Nudt22	6.56647	0.594551	0.673922	0.882226	0.377654	0.999963	Glutamatergic	up
Mmp11	2.45535	0.593825	1.01728	0.58374	0.559396	0.999963	Glutamatergic	up
Kcnv2	5.11018	0.592986	0.787218	0.753268	0.451289	0.999963	Glutamatergic	up
Smim6	2.94257	0.592663	0.935295	0.633664	0.5263	0.999963	Glutamatergic	up
Tshz2	1376.07	0.592647	0.545502	1.08642	0.277292	0.999963	Glutamatergic	up
Ttc34	5.54203	0.592568	0.734778	0.806459	0.419978	0.999963	Glutamatergic	up
Gm10999	4.47143	0.592388	0.819297	0.723044	0.469653	0.999963	Glutamatergic	up
Ninj1	7.86389	0.592018	0.683098	0.866665	0.386126	0.999963	Glutamatergic	up
Hist1h2ap	1.0515	0.591191	1.60506	0.368329	0.712628	0.999963	Glutamatergic	up
Pih1h3b	1.12238	0.590782	1.73321	0.340861	0.733209	0.999963	Glutamatergic	up
Mmp28	3.18625	0.590738	0.955625	0.618169	0.536464	0.999963	Glutamatergic	up
Ticam2	0.464275	0.589735	2.92039	0.201937	0.839966	0.999963	Glutamatergic	up
Eno1b	2.46459	0.589596	1.00586	0.58616	0.557768	0.999963	Glutamatergic	up
Cd209f	0.474915	0.588831	2.89787	0.203194	0.838983	0.999963	Glutamatergic	up
Gm10226	1.20776	0.586191	1.6209	0.361646	0.717617	0.999963	Glutamatergic	up
Folr2	4.29532	0.586081	0.739797	0.792218	0.428233	0.999963	Glutamatergic	up
Ttll9	21.3182	0.584999	0.358556	1.63154	0.102776	0.999963	Glutamatergic	up
Catsperb	2.03812	0.584804	1.20937	0.48356	0.628698	0.999963	Glutamatergic	up
Gm7324	1.68112	0.584364	1.19961	0.487128	0.626168	0.999963	Glutamatergic	up
Ccl22	0.269691	0.58419	3.15218	0.185329	0.852971	0.999963	Glutamatergic	up
Pcdhgb7	9.17456	0.583781	0.594435	0.982078	0.326062	0.999963	Glutamatergic	up
Lbhd2	0.482802	0.582054	2.8552	0.203858	0.838465	0.999963	Glutamatergic	up
Ropn1l	16.5358	0.581973	0.395659	1.4709	0.141319	0.999963	Glutamatergic	up
Cyp4f15	2.39704	0.580022	1.07012	0.542015	0.58780836033847506	0.999963	Glutamatergic	up
Vmn1r12	5.29411	0.579985	0.791369	0.732889	0.463626	0.999963	Glutamatergic	up
Mab21l1	3.98922	0.578951	0.830034	0.697503	0.485488	0.999963	Glutamatergic	up
Srms	2.15875	0.577806	1.11703	0.517271	0.604967	0.999963	Glutamatergic	up
Rspo2	716.49	0.577769	0.133757	4.31955	1.56348981309708e-5	0.0269561	Glutamatergic	up
Ptrh1	8.51088	0.576896	0.575835	1.00184	0.31642	0.999963	Glutamatergic	up
Tnfsf13	5.8413502193438704	0.576419	0.745793	0.772894	0.439585	0.999963	Glutamatergic	up
Vmn2r53	9.60688	0.57575	0.530708	1.08487	0.277979	0.999963	Glutamatergic	up
C2cd6	11.3881	0.575329	0.493682	1.16538	0.243864	0.999963	Glutamatergic	up
Palm3	6.48665	0.575256	0.644222	0.892947	0.371886	0.999963	Glutamatergic	up
6330409D20Rik	7.6843	0.575022	0.597817	0.96187	0.336115	0.999963	Glutamatergic	up
Asap3	18.1475	0.574404	0.417392	1.37617	0.168768	0.999963	Glutamatergic	up
Dmac1	23.8726	0.574259	0.357273	1.60734	0.10798	0.999963	Glutamatergic	up
Casr	0.775986	0.573362	2.03736	0.281424	0.778386	0.999963	Glutamatergic	up
Trpm5	0.863641	0.571467	2.04093	0.280003	0.779475	0.999963	Glutamatergic	up
Rilp	6.76536	0.571164	0.623484	0.916086	0.359622	0.999963	Glutamatergic	up
Rapgef3	30.0575	0.570353	0.338023	1.68732	0.0915421	0.999963	Glutamatergic	up
Mgl2	0.282772	0.570115	3.15016	0.180979	0.856384	0.999963	Glutamatergic	up
Gsdmc4	0.955631	0.567886	1.93586	0.293351	0.769254	0.999963	Glutamatergic	up
Id3	4.01695	0.566406	0.847364	0.668432	0.503858	0.999963	Glutamatergic	up
Abca9	20.529790206295502	0.566404	0.448615	1.26256	0.206747	0.999963	Glutamatergic	up
Dock11	38.4683	0.566215	0.312821	1.81003	0.0702913	0.999963	Glutamatergic	up
Snai1	1.00165	0.565529	1.93369	0.292461	0.769934	0.999963	Glutamatergic	up
Copz2	5.27612	0.563259	0.690182	0.816102	0.414442	0.999963	Glutamatergic	up
D930048N14Rik	33.5002	0.562919	0.283851	1.98315	0.0473508	0.999963	Glutamatergic	up
Dkk2	36.2859	0.562828	0.466829	1.20564	0.227956	0.999963	Glutamatergic	up
Vmn1r4	5.48873	0.561657	0.674641	0.832526	0.405112	0.999963	Glutamatergic	up
Gm45194	7.29153	0.561625	0.6697	0.838622	0.401681	0.999963	Glutamatergic	up
Gm11077	1.12805	0.560521	1.55703	0.359993	0.718852	0.999963	Glutamatergic	up
Vwa1	36.797	0.560455	0.290058	1.93222	0.0533329	0.999963	Glutamatergic	up
Eya2	11.9206	0.559858	0.48519	1.15389	0.248544	0.999963	Glutamatergic	up
Fes	1.05027	0.559707	1.65865	0.337447	0.73578	0.999963	Glutamatergic	up
Ddr2	2.49323	0.559382	1.14276	0.489502	0.624487	0.999963	Glutamatergic	up
Gm10271	2.27388	0.559034	1.21106	0.461608	0.644363	0.999963	Glutamatergic	up
Entpd2	2.103	0.558825	1.29812	0.430487	0.666841	0.999963	Glutamatergic	up
Isg15	6.04978	0.558628	0.72789	0.767463	0.442806	0.999963	Glutamatergic	up
Syne4	35.9293	0.558492	0.280616	1.99023	0.0465653	0.999963	Glutamatergic	up
Cd164l2	26.2897	0.558386	0.326111	1.71226	0.0868496	0.999963	Glutamatergic	up
Adig	10.3417	0.558385	0.544321	1.02584	0.304967	0.999963	Glutamatergic	up
Fscn2	6.88998	0.55699	0.631343	0.882231	0.377652	0.999963	Glutamatergic	up
AU021092	2.34388	0.556471	1.04107	0.534517	0.592984	0.999963	Glutamatergic	up
C2cd4c	42.4477	0.556141	0.26742	2.07965	0.0375573	0.999963	Glutamatergic	up
Edaradd	2.06101	0.555729	1.1459	0.484971	0.627697	0.999963	Glutamatergic	up
Maml3	6596.04	0.555493	0.112702	4.92887	8.27072279513042e-7	0.00475318	Glutamatergic	up
Ifitm1	2.81093	0.555156	1.08169	0.513232	0.607789	0.999963	Glutamatergic	up
Brca1	16.1036	0.55492	0.412844	1.34414	0.178904	0.999963	Glutamatergic	up
Exoc3l	1.91286	0.554293	1.16404	0.476178	0.633947	0.999963	Glutamatergic	up
Rarres1	11.4381	0.553928	0.515439	1.07467	0.282522	0.999963	Glutamatergic	up
Ccdc83	0.931282	0.553854	1.82658	0.30322	0.761722	0.999963	Glutamatergic	up
Tekt3	3.20185	0.553746	1.13155	0.489368	0.624581	0.999963	Glutamatergic	up
Olfr25	2.18053	0.552741	1.14285	0.483652	0.628633	0.999963	Glutamatergic	up
Lhcgr	4.12588	0.551844	0.802531	0.687629	0.491687	0.999963	Glutamatergic	up
C2cd4b	19.8999	0.551768	0.382489	1.44257	0.14914	0.999963	Glutamatergic	up
Tlr7	7.60565	0.551396	0.572404	0.9633	0.335397	0.999963	Glutamatergic	up
1700017D01Rik	4.91006	0.55117	0.799013	0.689813	0.490312	0.999963	Glutamatergic	up
Gm5751	9.04968	0.551016	0.549135	1.00343	0.315656	0.999963	Glutamatergic	up
Gm19935	0.649961	0.550347	2.17121	0.253474	0.799902	0.999963	Glutamatergic	up
Ercc6l	0.682033	0.550182	2.53776	0.216798	0.828366	0.999963	Glutamatergic	up
Gas1	10.8515	0.549643	0.510097	1.07753	0.281246	0.999963	Glutamatergic	up
Cobll1	49.6934	0.54928	0.653501	0.840519	0.400617	0.999963	Glutamatergic	up
Gm5592	1.63733	0.548645	1.29117	0.424921	0.670894	0.999963	Glutamatergic	up
Ntn1	15.9349	0.548498	0.412772	1.32882	0.183909	0.999963	Glutamatergic	up
Sema4g	20.8941	0.547799	0.385467	1.42113	0.155279	0.999963	Glutamatergic	up
Serpinb6c	7.40415	0.547613	0.607053	0.902084	0.367012	0.999963	Glutamatergic	up
Nmu	1.9876	0.546609	1.25294	0.436261	0.662647	0.999963	Glutamatergic	up
Spp1	4.14101	0.546157	0.862444	0.633266	0.52656	0.999963	Glutamatergic	up
Pik3cg	1.24383	0.545527	1.52244	0.358324	0.720101	0.999963	Glutamatergic	up
Wt1	0.621699	0.545225	1.96178	0.277924	0.781071	0.999963	Glutamatergic	up
Tnnc1	99.3706	0.544116	0.20366	2.67169	0.00754695	0.999963	Glutamatergic	up
Runx1	4.17923	0.5435	0.889799	0.610812	0.541324	0.999963	Glutamatergic	up
Pipox	5.24061	0.542718	0.727674	0.745825	0.455773	0.999963	Glutamatergic	up
Sdcbp2	18.6987	0.541062	0.37051	1.46032	0.144203	0.999963	Glutamatergic	up
Rpl41	214.685	0.540956	0.213824	2.52991	0.0114091	0.999963	Glutamatergic	up
Gm6408	0.893538	0.54071	1.76283	0.306729	0.75905	0.999963	Glutamatergic	up
Mag	3.60618	0.538683	0.98309	0.547949	0.583727	0.999963	Glutamatergic	up
Olfr1191-ps1	0.678346	0.53803	2.23619	0.240601	0.809865	0.999963	Glutamatergic	up
Cdkn1a	82.0378	0.537438	0.247588	2.17069	0.0299546	0.999963	Glutamatergic	up
Cacng4	92.8297	0.537272	0.189924	2.82888	0.00467114	0.999963	Glutamatergic	up
Bend7	86.6342	0.536036	0.196289	2.73086	0.00631702	0.999963	Glutamatergic	up
Nxph4	4.88419	0.535091	0.792126	0.675512	0.49935	0.999963	Glutamatergic	up
Tslp	1.84697	0.534954	1.19527	0.44756	0.654471	0.999963	Glutamatergic	up
Olfr1428	0.472029	0.53469	3.11151	0.171843	0.863561	0.999963	Glutamatergic	up
Pm20d1	0.926769	0.534115	1.89002	0.282598	0.777485	0.999963	Glutamatergic	up
Msc	13.8481	0.534094	0.44443	1.20175	0.22946	0.999963	Glutamatergic	up
Fam187b	1.65463	0.533982	1.30673	0.408641	0.682803	0.999963	Glutamatergic	up
Ndst4	84.7741	0.533975	0.777396	0.686876	0.492161	0.999963	Glutamatergic	up
Atg9b	10.5306	0.533821	0.52758	1.01183	0.31162	0.999963	Glutamatergic	up
Nod2	4.93676	0.533555	0.721366	0.739645	0.459515	0.999963	Glutamatergic	up
Lrrc63	3.16558	0.533485	0.97802	0.545474	0.585427	0.999963	Glutamatergic	up
Ppara	9.45498	0.532517	0.560971	0.949278	0.342479	0.999963	Glutamatergic	up
Wif1	1.01362	0.532408	1.76043	0.30243	0.762324	0.999963	Glutamatergic	up
Creb3l1	7.05915	0.532257	0.630094	0.844728	0.398263	0.999963	Glutamatergic	up
Sdc4	12.2826	0.532134	0.517815	1.02765	0.304113	0.999963	Glutamatergic	up
Gpnmb	2.24212	0.531856	1.03582	0.513462	0.607628	0.999963	Glutamatergic	up
Pif1	1.57372	0.531624	1.4574	0.364777	0.715278	0.999963	Glutamatergic	up
Wdr72	2.98821	0.531296	0.911102	0.583136	0.559802	0.999963	Glutamatergic	up
Chrna2	3.02808	0.530778	0.956857	0.55471	0.579093	0.999963	Glutamatergic	up
Itih2	3.26893	0.5306	0.950742	0.558091	0.576782	0.999963	Glutamatergic	up
H2afj	45.6524	0.529658	0.355649	1.48927	0.136416	0.999963	Glutamatergic	up
Abca14	2.56574	0.529376	1.03201	0.512958	0.607981	0.999963	Glutamatergic	up
Siglech	8.70326	0.52936	0.611514	0.865655	0.38668	0.999963	Glutamatergic	up
Ildr1	3.74395	0.529241	0.958909	0.551921	0.581003	0.999963	Glutamatergic	up
Apoa2	1.405	0.528544	1.43981	0.367092	0.71355	0.999963	Glutamatergic	up
Vmn1r39	0.803594	0.528031	2.38156	0.221716	0.824535	0.999963	Glutamatergic	up
Pear1	1.3777	0.527677	1.42471	0.370375	0.711103	0.999963	Glutamatergic	up
Clec2d	2.10708	0.527194	1.35183	0.389986	0.696547	0.999963	Glutamatergic	up
Crabp2	4.23629	0.527183	0.83468	0.631599	0.527649	0.999963	Glutamatergic	up
Klk9	0.940832	0.526616	1.65192	0.31879	0.749886	0.999963	Glutamatergic	up
Stac	127.214	0.526594	0.47781	1.1021	0.270418	0.999963	Glutamatergic	up
Emilin1	3.2043	0.526159	0.917069	0.57374	0.566144	0.999963	Glutamatergic	up
Cpt2	5.52923	0.525943	0.674984	0.779194	0.435866	0.999963	Glutamatergic	up
Myo1a	14.086	0.525233	0.465401	1.12856	0.259083	0.999963	Glutamatergic	up
Fmo1	1.34538	0.524794	1.63858	0.320273	0.748762	0.999963	Glutamatergic	up
Gm10309	35.7525	0.524384	0.337185	1.55518	0.119902	0.999963	Glutamatergic	up
Lama5	6.78264	0.524101	0.639136	0.820015	0.412208	0.999963	Glutamatergic	up
Zc2hc1b	2.39583	0.522916	1.01587	0.51474521013363606	0.606731	0.999963	Glutamatergic	up
Ccdc154	0.705092	0.521726	2.20348	0.236774	0.812832	0.999963	Glutamatergic	up
C87499	0.832869	0.521333	2.05917	0.253176	0.800132	0.999963	Glutamatergic	up
Pla2g10	12.5905	0.521164	0.482955	1.07912	0.280536	0.999963	Glutamatergic	up
Flnc	1.02495	0.520815	1.60588	0.324318	0.745697	0.999963	Glutamatergic	up
Ung	15.3336	0.519141	0.470188	1.10411	0.26954416290884903	0.999963	Glutamatergic	up
H2-Q2	0.481398	0.518464	2.56014	0.202514	0.839515	0.999963	Glutamatergic	up
Prg4	8.59523	0.516717	0.647918	0.797504	0.425158	0.999963	Glutamatergic	up
Gfra1	98.6839	0.516562	0.219701	2.35121	0.0187127	0.999963	Glutamatergic	up
AU022751	2.79621	0.516137	0.966349	0.53411	0.593265	0.999963	Glutamatergic	up
Ttc32	17.8634	0.514736	0.383233	1.34314	0.179227	0.999963	Glutamatergic	up
Tspan18	3.26644	0.513139	0.963185	0.532752	0.594205	0.999963	Glutamatergic	up
Bst2	2.26491	0.512849	1.07517	0.476992	0.633368	0.999963	Glutamatergic	up
Tns1	71.2263	0.512587	0.237283	2.16024	0.0307545	0.999963	Glutamatergic	up
Gja5	7.62018	0.51256	0.590572	0.867904	0.385447	0.999963	Glutamatergic	up
Pcdha8	15.3145	0.512255	0.423475	1.20965	0.226415	0.999963	Glutamatergic	up
Def6	4.1286	0.512231	0.815431	0.628173	0.529891	0.999963	Glutamatergic	up
Gamt	4.30839	0.512099	0.890848	0.574845	0.565396	0.999963	Glutamatergic	up
Tbx1	0.861056	0.511711	1.81034	0.28266	0.777437	0.999963	Glutamatergic	up
Aspdh	5.96804	0.511615	0.680179	0.752177	0.451945	0.999963	Glutamatergic	up
Arl9	9.26507	0.511447	0.534294	0.957239	0.338447	0.999963	Glutamatergic	up
Mslnl	20.89	0.511392	0.376908	1.35681	0.174841	0.999963	Glutamatergic	up
Lpar1	192.537	0.511356	0.161045	3.17524	0.00149715	0.860411	Glutamatergic	up
Cspg4	5.41176	0.511155	0.707032	0.722959	0.469705	0.999963	Glutamatergic	up
Ccl21a	0.999729	0.510317	1.8293	0.278969	0.780269	0.999963	Glutamatergic	up
Cpt1b	16.913027489444602	0.509702	0.397641	1.28181	0.199908	0.999963	Glutamatergic	up
S100a16	13.6078	0.509311	0.48934	1.04081	0.297963	0.999963	Glutamatergic	up
Prss41	0.565864	0.509019	2.70974	0.187848	0.850996	0.999963	Glutamatergic	up
Cdh23	8.98537	0.50807	0.659276	0.770649	0.440915	0.999963	Glutamatergic	up
Lcn2	0.773299	0.507488	2.64975	0.191523	0.848116	0.999963	Glutamatergic	up
Col1a2	5.09105	0.507465	0.842621	0.602246	0.54701	0.999963	Glutamatergic	up
Awat2	5.70077	0.506775	0.661598	0.765987	0.443684	0.999963	Glutamatergic	up
Foxc1	9.20882	0.50635	0.537949	0.941259	0.346572	0.999963	Glutamatergic	up
Card11	1.55134	0.505851	1.45122	0.34857	0.727412	0.999963	Glutamatergic	up
Actl9	2.8647	0.505149	0.896972	0.563171	0.573318	0.999963	Glutamatergic	up
Tmem119	5.66486	0.504718	0.777054	0.649527	0.515998	0.999963	Glutamatergic	up
Taf9	8.4864	0.504532	0.563002	0.896147	0.370174	0.999963	Glutamatergic	up
Gins1	32.7287	0.504051	0.294139	1.71365	0.0865931	0.999963	Glutamatergic	up
Ffar4	0.439395	0.503245	3.03233	0.16596	0.868189	0.999963	Glutamatergic	up
Arid5a	34.2156	0.502517	0.287572	1.74744	0.0805602	0.999963	Glutamatergic	up
Dnd1	17.6491	0.502345	0.458563	1.09548	0.273308	0.999963	Glutamatergic	up
Fmo2	2.48237	0.501116	1.13279	0.442372	0.65822	0.999963	Glutamatergic	up
AA467197	1.4722	0.500469	1.30242	0.384261	0.700785	0.999963	Glutamatergic	up
Tnfaip6	154.5	0.500406	0.73165	0.683941	0.494012	0.999963	Glutamatergic	up
Crocc2	1.22833	0.500351	1.52608	0.327866	0.743013	0.999963	Glutamatergic	up
Bcl2l12	3.63844	0.499564	0.8354	0.597994	0.549844	0.999963	Glutamatergic	up
Igsf3	174.311	0.499475	0.166118	3.00674	0.00264062	0.999963	Glutamatergic	up
Cdc20	4.66265	0.497509	0.808399	0.615424	0.538274	0.999963	Glutamatergic	up
Notch4	4.05132	0.497216	0.812418	0.61202	0.540525	0.999963	Glutamatergic	up
Bnipl	44.0162	0.497172	0.261026	1.90468	0.0568214	0.999963	Glutamatergic	up
Smim27	2.05748	0.497049	1.24198	0.400208	0.689004	0.999963	Glutamatergic	up
Lpar4	2.78738	0.496753	1.0402	0.477557	0.632966	0.999963	Glutamatergic	up
Cysltr2	1.11074	0.496071	1.63904	0.30266	0.762149	0.999963	Glutamatergic	up
Chek2	27.9274	0.495907	0.306337	1.61883	0.105484	0.999963	Glutamatergic	up
Sec31b	2.33878	0.495821	1.12163	0.442054	0.65845	0.999963	Glutamatergic	up
C1qc	7.97565	0.495268	0.630868	0.785057	0.43242	0.999963	Glutamatergic	up
Heyl	2.08188	0.494904	1.15896	0.427025	0.669361	0.999963	Glutamatergic	up
Slc5a5	19.4541	0.494268	0.466358	1.05985	0.289215	0.999963	Glutamatergic	up
Shc4	53.9317	0.49376	0.336262	1.46838	0.142002	0.999963	Glutamatergic	up
Gm36210	2.64477	0.493288	1.08552	0.454424	0.649524	0.999963	Glutamatergic	up
Alkal1	12.6833	0.49303	0.528081	0.933627	0.350496	0.999963	Glutamatergic	up
Ccdc190	4.44156	0.492863	0.960722	0.513014	0.607942	0.999963	Glutamatergic	up
Myrfl	19.9842	0.491414	0.400145	1.22809	0.219413	0.999963	Glutamatergic	up
Vav2	55.3682	0.490996	0.245166	2.00271	0.0452086	0.999963	Glutamatergic	up
Ccnq	12.9631	0.489898	0.467648	1.04758	0.294833	0.999963	Glutamatergic	up
Cpne2	20.0034	0.489845	0.375874	1.30322	0.192501	0.999963	Glutamatergic	up
Tmcc3	116.313	0.48969	0.187868	2.60656	0.00914568	0.999963	Glutamatergic	up
Ubash3b	346.7	0.489635	0.430751	1.1367	0.255664	0.999963	Glutamatergic	up
Sqor	3.78815	0.489304	0.799143	0.612286	0.540349	0.999963	Glutamatergic	up
Cdk15	7.02495	0.489157	0.648607	0.754165	0.45075	0.999963	Glutamatergic	up
Dchs2	77.3272	0.488463	0.255181	1.91418	0.0555971	0.999963	Glutamatergic	up
Gpr143	1.13435	0.488412	1.5362063691191301	0.317934	0.750535	0.999963	Glutamatergic	up
Lef1	6.39455	0.487724	0.870668	0.560172	0.575362	0.999963	Glutamatergic	up
Fam163a	8.15077	0.486481	0.613537	0.792912	0.427829	0.999963	Glutamatergic	up
Col7a1	21.2467	0.486354	0.358904	1.35511	0.175383	0.999963	Glutamatergic	up
Fgf11	15.8033	0.486317	0.463644	1.0489	0.294224	0.999963	Glutamatergic	up
Nepn	0.882096	0.48603	2.31354	0.21008	0.833605	0.999963	Glutamatergic	up
Gm26558	1.07835	0.485524	1.5743	0.308407	0.757773	0.999963	Glutamatergic	up
Hmga2	5.3658	0.4851	0.706058	0.687054	0.492049	0.999963	Glutamatergic	up
Efnb3	59.1431	0.4849	0.256676	1.88915	0.0588717	0.999963	Glutamatergic	up
Alk	128.494	0.48421	0.179245	2.70139	0.0069051	0.999963	Glutamatergic	up
Fbxo48	3.44931	0.483602	0.911767	0.530401	0.595834	0.999963	Glutamatergic	up
Cep112	1107.21	0.482844	0.110771	4.35894	1.30696427600429e-5	0.0250371	Glutamatergic	up
Cnga2	11.6855	0.482593	0.495467	0.974017	0.330048	0.999963	Glutamatergic	up
D930020B18Rik	14.7616	0.482561	0.426236	1.13215	0.257573	0.999963	Glutamatergic	up
Vmn2r38	0.438502	0.48255	2.96351	0.162831	0.870652	0.999963	Glutamatergic	up
Gm3164	10.2998	0.482493	0.578779	0.83364	0.404484	0.999963	Glutamatergic	up
Mfap5	0.932589	0.482345	1.65194	0.291987	0.770297	0.999963	Glutamatergic	up
Sox18	4.57882	0.482114	0.867218	0.555932	0.578257	0.999963	Glutamatergic	up
Lrig3	8.05242	0.481942	0.602125	0.800401	0.423478	0.999963	Glutamatergic	up
Gm3435	56.7368	0.481	0.238844	2.01387	0.0440234	0.999963	Glutamatergic	up
Kif2c	2.33193	0.478825	1.03909	0.460813	0.644933	0.999963	Glutamatergic	up
Xrcc2	38.2262	0.478688	0.274124	1.74625	0.0807678	0.999963	Glutamatergic	up
Gm16253	6.02319	0.478296	0.725033	0.659689	0.509453	0.999963	Glutamatergic	up
Cst3	237.341	0.477444	0.201941	2.36427	0.0180656	0.999963	Glutamatergic	up
Podnl1	1.90552	0.477004	1.09696	0.43484	0.663678	0.999963	Glutamatergic	up
Tex29	12.5416	0.476567	0.468221	1.01783	0.308761	0.999963	Glutamatergic	up
Ttc12	2.53628	0.47644	1.06586	0.446999	0.654876	0.999963	Glutamatergic	up
Rrad	6.1106	0.475301	0.655909	0.724644	0.468671	0.999963	Glutamatergic	up
Rerg	6.85593	0.475158	0.673943	0.705042	0.480784	0.999963	Glutamatergic	up
Nodal	1.63921	0.474864	1.41688	0.335148	0.737514	0.999963	Glutamatergic	up
Clcnka	1.05518	0.47463	2.01947	0.235027	0.814188	0.999963	Glutamatergic	up
Tbc1d10c	10.766	0.473019	0.511906	0.924035	0.355468	0.999963	Glutamatergic	up
Acp7	7.40129	0.472987	0.585922	0.807253	0.419521	0.999963	Glutamatergic	up
Rhbdf1	56.5197	0.472573	0.220441	2.14377	0.0320516	0.999963	Glutamatergic	up
Fzd7	2.06358	0.472353	1.13938	0.41457	0.678457	0.999963	Glutamatergic	up
Hdc	0.624392	0.472333	2.17741	0.216924	0.828268	0.999963	Glutamatergic	up
Mcts2	30.5709	0.47193	0.332588	1.41896	0.155911	0.999963	Glutamatergic	up
Cd300lf	10.35	0.471881	0.509753	0.925705	0.354599	0.999963	Glutamatergic	up
Olfr287	2.05478	0.471428	1.10342	0.427244	0.669202	0.999963	Glutamatergic	up
Triml2	3.31148	0.470958	0.90854	0.518368	0.604202	0.999963	Glutamatergic	up
Nptx2	399.522	0.469801	0.107467	4.37159	1.23344825279707e-5	0.0250371	Glutamatergic	up
Olfr1513	2.04834	0.468551	1.16354	0.402693	0.687174	0.999963	Glutamatergic	up
Eif3j2	2.99633	0.468303	0.972634	0.481479	0.630176	0.999963	Glutamatergic	up
Myl3	3.23296	0.467467	0.970376	0.481738	0.629992	0.999963	Glutamatergic	up
Fam177a	5.18376	0.467157	0.729399	0.640468	0.521869	0.999963	Glutamatergic	up
Actn3	7.42934	0.466928	0.58304372866407606	0.800845	0.423221	0.999963	Glutamatergic	up
Hist1h3d	0.773665	0.465405	1.81662	0.256193	0.797802	0.999963	Glutamatergic	up
Gm7276	46.8184	0.465317	0.249131	1.86776	0.0617952	0.999963	Glutamatergic	up
Gdpd5	764.111	0.463844	0.101574	4.56655	4.95808420789241e-6	0.0131492	Glutamatergic	up
Nid1	4.27155	0.463601	0.910081	0.509406	0.610468	0.999963	Glutamatergic	up
1110008P14Rik	241.423	0.463579	0.137946	3.36058	7.7780356723146e-4	0.609551	Glutamatergic	up
Olfr545	12.3817	0.463105	0.494892	0.935771	0.349391	0.999963	Glutamatergic	up
Akain1	40.9286	0.462642	0.280291	1.65058	0.0988247	0.999963	Glutamatergic	up
Adgrf1	0.76773	0.462197	1.81317	0.25491	0.798792	0.999963	Glutamatergic	up
Gm14569	2.07747	0.462029	1.0738	0.430274	0.666997	0.999963	Glutamatergic	up
Ddah1	438.179	0.461752	0.192262	2.40168	0.0163202	0.999963	Glutamatergic	up
Cby3	4.9143554990014104	0.461246	0.752504	0.612949	0.53991	0.999963	Glutamatergic	up
Helz2	21.2109	0.460986	0.388374	1.18696	0.235242	0.999963	Glutamatergic	up
Mgst1	3.20551	0.460357	1.00935	0.456095	0.648322	0.999963	Glutamatergic	up
Thap8	3.05411	0.460274	0.978203	0.47053	0.637977	0.999963	Glutamatergic	up
Zfp986	11.3162	0.459889	0.525734	0.874756	0.381707	0.999963	Glutamatergic	up
Pde1c	147.777	0.459386	0.190346	2.41343	0.0158032	0.999963	Glutamatergic	up
1700007K13Rik	8.01481	0.458936	0.571066	0.803649	0.4216	0.999963	Glutamatergic	up
Icam4	3.67951	0.458793	0.912577	0.502745	0.615144	0.999963	Glutamatergic	up
Gpr39	9.12283	0.458644	0.517756	0.88583	0.375709	0.999963	Glutamatergic	up
Cped1	56.4554	0.458578	0.315859	1.45185	0.146544	0.999963	Glutamatergic	up
Serpinb5	2.25218	0.457879	1.12569	0.406753	0.684189	0.999963	Glutamatergic	up
Zfp383	37.2974	0.457858	0.321783	1.42288	0.154771	0.999963	Glutamatergic	up
Tgfbr2	40.7322	0.457445	0.281534	1.62483	0.104199	0.999963	Glutamatergic	up
Nudt8	8.89593	0.457383	0.599523	0.762912	0.445516	0.999963	Glutamatergic	up
Olfr675	0.756788	0.45734785934454403	2.39861	0.190672	0.848783	0.999963	Glutamatergic	up
Clec4g	3.14556	0.45723	0.928046	0.49268	0.622238	0.999963	Glutamatergic	up
Egfr	27.2753	0.457177	0.332996	1.37292	0.169776	0.999963	Glutamatergic	up
Il31ra	7.33536	0.457077	0.615959	0.742057	0.458053	0.999963	Glutamatergic	up
Egln3	19.8122	0.456354	0.414716	1.1004	0.271158	0.999963	Glutamatergic	up
Kif26a	29.8348	0.454628	0.300559	1.51261	0.130379	0.999963	Glutamatergic	up
B430305J03Rik	1.01045	0.453682	1.75348	0.258733	0.795842	0.999963	Glutamatergic	up
Megf6	3.81108	0.45365	0.838277	0.541169	0.588391	0.999963	Glutamatergic	up
Sertad1	77.9345	0.453555	0.245624	1.84654	0.0648136	0.999963	Glutamatergic	up
Tdrd1	7.52736	0.452909	0.720219	0.628849	0.529448	0.999963	Glutamatergic	up
Ttc41	32.928	0.452673	0.286519	1.57991	0.114128	0.999963	Glutamatergic	up
Gm6034	5.33115	0.452647	0.703078	0.643807	0.519701	0.999963	Glutamatergic	up
Ltb4r2	0.62528	0.452353	2.30081	0.196606	0.844136	0.999963	Glutamatergic	up
Themis2	3.04247	0.452352	0.936221	0.483168	0.628976	0.999963	Glutamatergic	up
Cgnl1	4.01508	0.452277	0.926903	0.487945	0.625589	0.999963	Glutamatergic	up
Rpe65	3.26333	0.452035	1.09174	0.414052	0.678836	0.999963	Glutamatergic	up
Sema5b	459.093	0.451481	0.139008	3.24788	0.00116267	0.742431	Glutamatergic	up
Hcn3	78.9739	0.451303	0.188605	2.39285	0.016718	0.999963	Glutamatergic	up
Lrrc66	0.726064	0.451291	2.01425	0.224049	0.822719	0.999963	Glutamatergic	up
Celsr1	2.4724	0.450853	1.20172	0.375174	0.707531	0.999963	Glutamatergic	up
2210011C24Rik	0.871588	0.450776	1.78529	0.252494	0.800659	0.999963	Glutamatergic	up
4930469K13Rik	3.58324	0.450407	0.895765	0.502819	0.615092	0.999963	Glutamatergic	up
Olfr556	3.29177	0.449877	0.927284	0.485155	0.627566	0.999963	Glutamatergic	up
Kif11	22.9513	0.449699	0.339737	1.32367	0.185613	0.999963	Glutamatergic	up
Rps27l	38.6369	0.449315	0.290163	1.54849	0.121503	0.999963	Glutamatergic	up
Crh	9.44541	0.449308	0.569215	0.789348	0.429909	0.999963	Glutamatergic	up
Trim12a	2.72839	0.448023	1.20626	0.371416	0.710327	0.999963	Glutamatergic	up
Tcf19	10.3484	0.44685	0.522186	0.85573	0.392147	0.999963	Glutamatergic	up
Pafah1b3	10.9544	0.446505	0.533914	0.836286	0.402994	0.999963	Glutamatergic	up
Ormdl1	36.2029	0.446051	0.271963	1.64012	0.100981	0.999963	Glutamatergic	up
Tbx2	8.83853	0.446037	0.560669	0.795544	0.426297	0.999963	Glutamatergic	up
Skor1	0.933567	0.445345	1.79636	0.247915	0.8042	0.999963	Glutamatergic	up
Mt3	60.134	0.445297	0.378059	1.17785	0.238856	0.999963	Glutamatergic	up
Cldn11	29.2077	0.444586	0.352736	1.2604	0.207527	0.999963	Glutamatergic	up
Insl6	4.90715	0.443878	0.73983	0.599973	0.548525	0.999963	Glutamatergic	up
Kank2	39.1702	0.443565	0.284953	1.55662	0.11956	0.999963	Glutamatergic	up
B4galnt3	217.119	0.443236	0.135717	3.26589	0.00109119	0.742431	Glutamatergic	up
Aqp1	3.36967	0.443161	0.846254	0.523673	0.600506	0.999963	Glutamatergic	up
Acot1	9.30421	0.442568	0.515152	0.859102	0.390284	0.999963	Glutamatergic	up
Cmtm1	1.12501	0.441888	1.61895	0.272946	0.784894	0.999963	Glutamatergic	up
Tmem82	1.45521	0.441886	1.46167	0.302316	0.762411	0.999963	Glutamatergic	up
Card19	13.7332	0.44043	0.484249	0.909512	0.36308	0.999963	Glutamatergic	up
Pdzd3	2.18935	0.439934	1.16855	0.376479	0.706561	0.999963	Glutamatergic	up
Anapc13	45.6326	0.439854	0.294722	1.49244	0.135584	0.999963	Glutamatergic	up
Csf2rb	1.46384	0.439598	1.40297	0.313333	0.754028	0.999963	Glutamatergic	up
Ripk4	0.669048	0.43926	2.14937	0.204367	0.838067	0.999963	Glutamatergic	up
Ccdc74a	45.0115	0.439211	0.266648	1.64716	0.0995259	0.999963	Glutamatergic	up
Ttpa	3.20809	0.438568	0.925344	0.473952	0.635534	0.999963	Glutamatergic	up
Tnfrsf4	20.9494	0.438516	0.349077	1.25621	0.209039	0.999963	Glutamatergic	up
Bdkrb2	6.94104	0.438293	0.615992	0.711524	0.476759	0.999963	Glutamatergic	up
Sp9	11.7676	0.438259	0.595964	0.735379	0.462108	0.999963	Glutamatergic	up
Emp3	5.74315	0.438205	0.71623	0.611821	0.540656	0.999963	Glutamatergic	up
Nuggc	3.36256	0.437805	0.93716	0.467161	0.640384	0.999963	Glutamatergic	up
Pnmt	0.649524	0.43715	2.53202	0.172649	0.862927	0.999963	Glutamatergic	up
Aass	3.2342	0.436911	0.910814	0.479693	0.631445	0.999963	Glutamatergic	up
Myl9	1.35108	0.436557	1.46426	0.298142	0.765595	0.999963	Glutamatergic	up
Ctu1	17.3135	0.436294	0.401081	1.0878	0.276685	0.999963	Glutamatergic	up
Edn2	0.582677	0.43576	2.69105	0.161929	0.871362	0.999963	Glutamatergic	up
Fcgr2b	0.928594	0.43485279803988097	1.79892	0.241731	0.808989	0.999963	Glutamatergic	up
Dlgap5	1.02693	0.434786	1.88369	0.230816	0.817458	0.999963	Glutamatergic	up
Bloc1s3	12.6324	0.434024	0.47294	0.917714	0.358769	0.999963	Glutamatergic	up
Gm5129	0.611119	0.433927	2.32858	0.186348	0.852172	0.999963	Glutamatergic	up
Rftn1	88.6241	0.433766	0.20196	2.14777	0.0317316	0.999963	Glutamatergic	up
Hpgd	33.5802	0.433036	0.355327	1.2187	0.222958	0.999963	Glutamatergic	up
N4bp3	23.0021	0.432914	0.386103	1.12124	0.262186	0.999963	Glutamatergic	up
Htr4	303.124	0.432398	0.177176	2.44049	0.0146672	0.999963	Glutamatergic	up
Smoc1	15.0105	0.432383	0.439165	0.984557	0.324842	0.999963	Glutamatergic	up
Clec11a	22.1918	0.432322	0.374564	1.1542	0.248417	0.999963	Glutamatergic	up
Tmem211	0.281831	0.431993	3.12181	0.138379	0.889941	0.999963	Glutamatergic	up
Atp7b	32.4538	0.431331	0.288701	1.49404	0.135165	0.999963	Glutamatergic	up
D6Ertd527e	0.646703	0.431306	2.27413	0.189658	0.849577	0.999963	Glutamatergic	up
Fhod1	34.0548	0.431116	0.277212	1.55519	0.119902	0.999963	Glutamatergic	up
Clec3b	15.3502	0.430765	0.407247	1.05775	0.290169	0.999963	Glutamatergic	up
Csf2ra	763.327	0.430759	0.0946512	4.55102	5.3387064947076e-6	0.0131492	Glutamatergic	up
Stag3	14.813	0.430463	0.427304	1.00739	0.313746	0.999963	Glutamatergic	up
Prps1l3	11.5815	0.430444	0.474729	0.906715	0.364557	0.999963	Glutamatergic	up
Gnrh1	11.7494	0.430321	0.49179	0.87501	0.381569	0.999963	Glutamatergic	up
Tcf7l2	11.1301	0.430301	0.513077	0.838669	0.401655	0.999963	Glutamatergic	up
4930579G24Rik	3.53135	0.430061	0.896927	0.479482	0.631595	0.999963	Glutamatergic	up
Slc1a3	114.608	0.430059	0.194012	2.21666	0.0266462	0.999963	Glutamatergic	up
Tacr1	6.3732	0.429847	0.679732	0.632378	0.52714	0.999963	Glutamatergic	up
Plk1	15.586	0.429012	0.454843	0.943208	0.345575	0.999963	Glutamatergic	up
Casq1	72.1044	0.428282	0.21887	1.95679	0.0503725	0.999963	Glutamatergic	up
Lbhd1	13.373	0.427982	0.43777	0.977641	0.328252	0.999963	Glutamatergic	up
Cyp1b1	1.79967	0.427364	1.17737	0.362983	0.716618	0.999963	Glutamatergic	up
Abcc9	4.97218	0.427152	0.699926	0.610282	0.541675	0.999963	Glutamatergic	up
Gtsf1	14.5189	0.42678	0.420383	1.01522	0.310002	0.999963	Glutamatergic	up
Slc22a3	45.6137	0.425785	0.257067	1.65632	0.0976573	0.999963	Glutamatergic	up
Reep6	13.0952	0.425722	0.45424	0.937217	0.348647	0.999963	Glutamatergic	up
Cntf	18.2285	0.425707	0.392305	1.08514	0.277859	0.999963	Glutamatergic	up
Ssc4d	13.2878	0.425694	0.479658	0.887495	0.374812	0.999963	Glutamatergic	up
Prss23	26.3481	0.425507	0.386647	1.10051	0.271111	0.999963	Glutamatergic	up
Gm6525	8.77361	0.42533	0.636499	0.668233	0.503985	0.999963	Glutamatergic	up
Rgs5	34.5684	0.425284	0.355067	1.19776	0.231012	0.999963	Glutamatergic	up
Glipr1l1	1.272	0.42502	1.56971	0.270762	0.786574	0.999963	Glutamatergic	up
Hmgb2	18.312	0.424452	0.376825	1.12639	0.26	0.999963	Glutamatergic	up
Slc41a3	13.4524	0.42413	0.47425	0.894318	0.371152	0.999963	Glutamatergic	up
Tnfsf9	1.15779	0.423836	1.45396	0.291504	0.770666	0.999963	Glutamatergic	up
Alx1	0.768197	0.42213	2.05865	0.205052	0.837532	0.999963	Glutamatergic	up
Ankrd1	1.16157	0.421879	1.51803	0.277911	0.781081	0.999963	Glutamatergic	up
Pdgfra	13.6205	0.421638	0.527934	0.798655	0.42449	0.999963	Glutamatergic	up
Sftpc	2.15697	0.421179	1.11706	0.377043	0.706141	0.999963	Glutamatergic	up
Sccpdh	102.295	0.420931	0.171775	2.45047	0.0142669	0.999963	Glutamatergic	up
H1fx	17.359	0.420641	0.40693	1.03369	0.30128	0.999963	Glutamatergic	up
Slco1a4	20.5533	0.420371	0.452626	0.928737	0.353025	0.999963	Glutamatergic	up
Tril	16.2794	0.420108	0.448474	0.93675	0.348887	0.999963	Glutamatergic	up
Sash3	1.64366	0.41991	1.24706	0.336719	0.736329	0.999963	Glutamatergic	up
Gprc5d	3.90575	0.419014	0.883001	0.474534	0.635119	0.999963	Glutamatergic	up
Tmem255b	1.1421	0.418923	1.67997	0.249363	0.80308	0.999963	Glutamatergic	up
Cdkn2c	3.58531	0.418878	0.873924	0.479308	0.63172	0.999963	Glutamatergic	up
Icam1	2.42316	0.418557	0.995196	0.420578	0.674063	0.999963	Glutamatergic	up
Atoh7	32.943	0.41807	0.314847	1.32785	0.184227	0.999963	Glutamatergic	up
Rsad2	1.86463	0.417546	1.23581	0.337873	0.735459	0.999963	Glutamatergic	up
Nbl1	54.3528	0.417449	0.274862	1.51876	0.128823	0.999963	Glutamatergic	up
Cd274	6.73959	0.416798	0.639578	0.651677	0.51461	0.999963	Glutamatergic	up
1110012L19Rik	6.2961	0.416566	0.652904	0.638021	0.52346	0.999963	Glutamatergic	up
9130230L23Rik	1.07762	0.415756	2.0049	0.20737	0.835721	0.999963	Glutamatergic	up
Fezf2	178.799	0.414241	0.159429	2.59828	0.00936923	0.999963	Glutamatergic	up
Plscr1	1.87103	0.414092	1.28724	0.321689	0.747688	0.999963	Glutamatergic	up
Kit	57.0546	0.414043	0.298971	1.38489	0.166085	0.999963	Glutamatergic	up
Spef2	13.5047	0.413449	0.483741	0.854689	0.392723	0.999963	Glutamatergic	up
Hspb7	0.797159	0.413279	2.14607	0.192575	0.847292	0.999963	Glutamatergic	up
C1s2	3.6004	0.412731	0.847835	0.486806	0.626396	0.999963	Glutamatergic	up
Olfr1220	0.628271	0.412431	2.88536	0.142939	0.886338	0.999963	Glutamatergic	up
Epha2	0.332329	0.412239	3.11965	0.132143	0.894871	0.999963	Glutamatergic	up
Aox1	4.62389	0.41222	0.773899	0.532654	0.594273	0.999963	Glutamatergic	up
Soat2	11.6826	0.412214	0.460921	0.894326	0.371148	0.999963	Glutamatergic	up
Postn	6.09464	0.412132	0.736764	0.559381	0.575902	0.999963	Glutamatergic	up
Mcoln2	0.533056	0.411732	3.0874	0.133359	0.89391	0.999963	Glutamatergic	up
Vmn2r89	0.533056	0.411732	3.0874	0.133359	0.89391	0.999963	Glutamatergic	up
Adgre5	6.50869	0.41168	0.713777	0.576763	0.5641	0.999963	Glutamatergic	up
0610012G03Rik	29.0588	0.411659	0.406963	1.01154	0.311759	0.999963	Glutamatergic	up
Rnf148	1.57351	0.411558	1.39373	0.295294	0.76777	0.999963	Glutamatergic	up
Ctxn2	27.0568	0.411274	0.314327	1.30843	0.190728	0.999963	Glutamatergic	up
Pdcd1	0.331377	0.411105	3.11809	0.131845	0.895107	0.999963	Glutamatergic	up
Rab25	0.331377	0.411105	3.11809	0.131845	0.895107	0.999963	Glutamatergic	up
Npw	0.331377	0.411105	3.11809	0.131845	0.895107	0.999963	Glutamatergic	up
Gpha2	0.331377	0.411105	3.11809	0.131845	0.895107	0.999963	Glutamatergic	up
Ms4a4d	0.331377	0.411105	3.11809	0.131845	0.895107	0.999963	Glutamatergic	up
Fam83b	6.76626	0.410772	0.723811	0.567513	0.570366	0.999963	Glutamatergic	up
Htr3a	1.22747	0.410671	1.51029	0.271915	0.785687	0.999963	Glutamatergic	up
Rho	3.69576	0.410613	0.846584	0.485023	0.62766	0.999963	Glutamatergic	up
Acan	5.01087	0.410031	0.83514	0.490973	0.623446	0.999963	Glutamatergic	up
Skint6	8.11829	0.409942	0.567868	0.721897	0.470358	0.999963	Glutamatergic	up
Ern2	1.25914	0.408523	1.37942	0.296155	0.767111	0.999963	Glutamatergic	up
Cfap161	4.71823	0.408284	0.762566	0.535408	0.592367	0.999963	Glutamatergic	up
Hyal4	0.309132	0.407333	3.11675	0.130691	0.89602	0.999963	Glutamatergic	up
Sult2a7	0.309132	0.407333	3.11675	0.130691	0.89602	0.999963	Glutamatergic	up
F10	0.309132	0.407333	3.11675	0.130691	0.89602	0.999963	Glutamatergic	up
Ccdc42	0.309132	0.407333	3.11675	0.130691	0.89602	0.999963	Glutamatergic	up
Dnaic2	6.1388	0.40702	0.699493	0.581878	0.560649	0.999963	Glutamatergic	up
Dpysl5	197.53	0.40663	0.170944	2.37873	0.0173725	0.999963	Glutamatergic	up
Gng13	48.4604	0.406317	0.305012	1.33213	0.182816	0.999963	Glutamatergic	up
Trim13	27.6658	0.405922	0.335838	1.20868	0.226785	0.999963	Glutamatergic	up
Fcgrt	4.55783	0.405168	0.83956	0.482596	0.629383	0.999963	Glutamatergic	up
Aoc3	2.52377	0.40497	1.11333	0.363748	0.716046	0.999963	Glutamatergic	up
Sytl5	6.54722	0.404869	0.649876	0.622994	0.533288	0.999963	Glutamatergic	up
Fndc10	31.8252	0.404792	0.332437	1.21765	0.223357	0.999963	Glutamatergic	up
Pqlc3	31.687	0.404456	0.329668	1.22686	0.219877	0.999963	Glutamatergic	up
Mavs	8.8877200452597709	0.40397	0.570114	0.708577	0.478587	0.999963	Glutamatergic	up
Avpr1a	0.29840505141678503	0.403809	3.11857	0.129485	0.896974	0.999963	Glutamatergic	up
Megf11	736.059	0.40362795702432003	0.0885167	4.55991	5.11763797609728e-6	0.0131492	Glutamatergic	up
Tmem212	1.19716	0.403605	1.46715	0.275094	0.783244	0.999963	Glutamatergic	up
Myc	3.55779	0.403549	0.828213	0.487253	0.626079	0.999963	Glutamatergic	up
Tmem45a2	2.21181	0.403464	1.13155	0.35656	0.721421	0.999963	Glutamatergic	up
Fkbp10	6.62106	0.402331	0.633054	0.635539	0.525077	0.999963	Glutamatergic	up
Pigr	0.839057	0.401868	2.37388	0.169287	0.865571	0.999963	Glutamatergic	up
Arsj	171.999	0.401719	0.179575	2.23706	0.0252827	0.999963	Glutamatergic	up
Eng	8.73423	0.401319	0.602905	0.665642	0.50564	0.999963	Glutamatergic	up
Fhdc1	31.3858	0.401213	0.295398	1.35821	0.174396	0.999963	Glutamatergic	up
Tsga10ip	3.21053	0.401125	0.894038	0.448666	0.653672	0.999963	Glutamatergic	up
Mettl18	22.7252	0.400967	0.379454	1.05669	0.290651	0.999963	Glutamatergic	up
Fibcd1	14.4277	0.400952	0.44136	0.908446	0.363643	0.999963	Glutamatergic	up
Il10ra	9.68399	0.400932	0.503877	0.795694	0.42621	0.999963	Glutamatergic	up
Ap1m2	22.5872	0.400689	0.367361	1.09072	0.275395	0.999963	Glutamatergic	up
Agtrap	4.23967	0.400641	0.89255	0.448872	0.653524	0.999963	Glutamatergic	up
Reep4	21.031	0.399246	0.400626	0.996557	0.318979	0.999963	Glutamatergic	up
Skint1	0.318649	0.398918	3.11594	0.128025	0.898129	0.999963	Glutamatergic	up
Igsf23	0.318649	0.398918	3.11594	0.128025	0.898129	0.999963	Glutamatergic	up
Gm364	0.318649	0.398918	3.11594	0.128025	0.898129	0.999963	Glutamatergic	up
Dll4	6.41061	0.398813	0.639199	0.623926	0.532676	0.999963	Glutamatergic	up
Birc5	8.59118	0.398528	0.541536	0.73592	0.461779	0.999963	Glutamatergic	up
Ear1	0.858992	0.39839	1.94192	0.205152	0.837453	0.999963	Glutamatergic	up
Slc25a13	33.9137	0.398323	0.290607	1.37066	0.170481	0.999963	Glutamatergic	up
H2-Aa	0.427863	0.398163	2.44734	0.162692	0.870761	0.999963	Glutamatergic	up
Lad1	0.940407	0.397611	1.86984	0.212644	0.831604	0.999963	Glutamatergic	up
Gm3248	29.3482	0.397512	0.30282	1.3127	0.189284	0.999963	Glutamatergic	up
Fchsd1	27.7335	0.39739	0.314655	1.26294	0.206611	0.999963	Glutamatergic	up
Fcna	3.58958	0.397386	0.883707	0.449681	0.652941	0.999963	Glutamatergic	up
Dnah3	35.7793	0.397307	0.300404	1.32258	0.185976	0.999963	Glutamatergic	up
Pde10a	29826.4	0.396938	0.236176	1.68069	0.092823	0.999963	Glutamatergic	up
Ssx9	0.749068	0.396338	2.12777	0.186269	0.852234	0.999963	Glutamatergic	up
Sds	3.34818	0.396227	0.871734	0.454528	0.649449	0.999963	Glutamatergic	up
Drc7	7.58412	0.395944	0.564568	0.701322	0.483102	0.999963	Glutamatergic	up
Gm9970	7.56515	0.395748	0.637764	0.620524	0.534913	0.999963	Glutamatergic	up
Klhl6	1.26934	0.395524	1.55847	0.253791	0.799657	0.999963	Glutamatergic	up
Foxc2	1.41271	0.395512	1.28004	0.308983	0.757334	0.999963	Glutamatergic	up
Gm2237	34.74	0.395352	0.28544	1.38506	0.166035	0.999963	Glutamatergic	up
Krt7	4.70412	0.395098	0.737737	0.535554	0.592267	0.999963	Glutamatergic	up
Fam83c	0.50328910396525794	0.39375	2.80648	0.1403	0.888423	0.999963	Glutamatergic	up
Cyb5d1	18.4365	0.393564	0.408505	0.963426	0.335334	0.999963	Glutamatergic	up
Vangl1	10.7493	0.393555	0.485964	0.809844	0.41803	0.999963	Glutamatergic	up
Ptpro	188.394	0.393143	0.154914	2.53781	0.0111549	0.999963	Glutamatergic	up
1810009A15Rik	5.60603	0.392944	0.68072	0.577247	0.563772	0.999963	Glutamatergic	up
Fmo4	1.12208	0.39272	1.63439	0.240285	0.810109	0.999963	Glutamatergic	up
Slc12a4	31.0741	0.392517	0.321703	1.22012	0.222418	0.999963	Glutamatergic	up
Cenpf	13.6357	0.392482	0.485316	0.808714	0.41868	0.999963	Glutamatergic	up
1700123L14Rik	3.31051	0.392061	0.974247	0.402425	0.687371	0.999963	Glutamatergic	up
Gm13547	4.65777	0.391572	0.743317	0.52679	0.598339	0.999963	Glutamatergic	up
Cyp19a1	2.02411	0.390928	1.26448	0.30916	0.7572	0.999963	Glutamatergic	up
Ndufa2	84.8936	0.390767	0.262478	1.48876	0.13655	0.999963	Glutamatergic	up
Atp2a1	3.55837	0.390636	0.858857	0.454833	0.64923	0.999963	Glutamatergic	up
Pwwp2b	33.0123	0.390413	0.281236	1.3882	0.165075	0.999963	Glutamatergic	up
Tns2	10.4465	0.389881	0.537907	0.724811	0.468568	0.999963	Glutamatergic	up
Dnah12	36.715	0.389359	0.323691	1.20287	0.229025	0.999963	Glutamatergic	up
Bmp6	13.4285	0.388882	0.522168	0.744744	0.456427	0.999963	Glutamatergic	up
Cd52	19.9873	0.388662	0.395152	0.983577	0.325324	0.999963	Glutamatergic	up
Mab21l2	2.3076	0.387495	1.15109	0.336632	0.736394	0.999963	Glutamatergic	up
Arg1	5.33551	0.387224	0.715614	0.541107	0.588434	0.999963	Glutamatergic	up
Gm36864	1.36142	0.387106	1.69383	0.228539	0.819228	0.999963	Glutamatergic	up
Vmn1r16	1.64439	0.386809	1.36395	0.283594	0.776721	0.999963	Glutamatergic	up
Gp1bb	24.4821	0.386451	0.327772	1.17902	0.238389	0.999963	Glutamatergic	up
Socs3	32.8692	0.385592	0.30182	1.27755	0.201407	0.999963	Glutamatergic	up
Tnni3k	9.75101	0.384911	0.525063	0.733077	0.463512	0.999963	Glutamatergic	up
Amotl2	29.1028	0.384901	0.305881	1.25833	0.208271	0.999963	Glutamatergic	up
B020004J07Rik	1.0309	0.384371	1.87217	0.205308	0.837331	0.999963	Glutamatergic	up
Acot4	25.4619	0.383994	0.317045	1.21117	0.225832	0.999963	Glutamatergic	up
Cyp2d22	4.6646	0.383918	0.927602	0.413883	0.67896	0.999963	Glutamatergic	up
Dbil5	5.47486	0.38344	0.72778	0.526863	0.598289	0.999963	Glutamatergic	up
Nudt15	7.26112	0.383277	0.744979	0.51448	0.606916	0.999963	Glutamatergic	up
Cacng5	10.7247	0.383138	0.582053	0.658252	0.510376	0.999963	Glutamatergic	up
BC030867	0.619606	0.382813	2.13229	0.179531	0.857521	0.999963	Glutamatergic	up
Dusp10	10.9939	0.382333	0.500907	0.763283	0.445295	0.999963	Glutamatergic	up
Gm8267	10.0887	0.381857	0.521313	0.732491	0.463869	0.999963	Glutamatergic	up
F2r	2.63867	0.381632	1.04482	0.365261	0.714916	0.999963	Glutamatergic	up
Vat1	5.34838	0.380939	0.760747	0.500744	0.616551	0.999963	Glutamatergic	up
[truncated: 85,298 more rows]

## Sheet: Table S8
gene_name	module	color	kME_Glut-M1	kME_grey	kME_Glut-M2	kME_Glut-M3	kME_Glut-M4	kME_Glut-M5	kME_Glut-M6	kME_Glut-M7	kME_Glut-M8	kME_Glut-M9	kME_Glut-M10
[truncated: 10,113 more rows]

[truncated: 8 more sheets: Table S9, Table S10, Table S11, Table S12, Table S13, Table S14, Table S15, Table S16]
